# Supplementary material for: Descriptive study and evaluation of shrink hoods with recycled content for regulatory compliance
Source: Research Square preprint supplement (doi:10.21203/rs.3.rs-6261320/v1), 2025-06-25
Supplement: Supplementary file 1 [file 51aff29fad780cce867021fb.xlsx]

## Sheet: Sample Details
Administrative Information
Export date	10 December 2024 09:42:24
Culture name	en-GB
Decimal separator	.
Workspace name	November 2024
Workspace path	C:\ProgramData\Agilent Technologies\GPC\Workspaces\2024\November 2024\
File name	ICF_04_12_2024-0007.sample
Creation date	06 December 2024 12:01:14
Created by	OBPC
Comments	Collected by Agilent GPC/SEC Software Version 2.1.9.34851
Software version	Agilent SEC Software - 2.1.9.34851
Sample Information
Sample name	E bis
Information
Sample type	Sample
Injection date	06 December 2024
Vial number	None
Injection number	1
Injection volume (µL)	200
Concentration (mg/mL)	1
dn/dc (mL/g)	0.1
UV extinction coefficient [(mg/mL)-¹][cm-¹]	1
Mp (g/mol)	100000
IV (dL/g)	0.5
Mark-Houwink K ((10e-5) dL/g)	14.1
Mark-Houwink Alpha	0.7
Analysed	Yes
Sample Instrument Conditions
Eluent
Eluent refractive index	1
Set flow rate (mL/min)	1
LS wavelength (nm)	650
Laser power (%)	0
Set detector temperature (°C)	0
Actual detector temperature (°C)	0
Actual flow rate (mL/min)	0
Column information
Data origin	Collected by Agilent GPC/SEC Software Version 2.1.9.34851
Instrument name	Agilent DataStream
Sample Collection Parameters
Collected by	OBPC
Number of channels	1
Run length (mins)	30.0167
Delay time (secs)	0
Sampling interval (secs)	1
Number of data points	1801
Sample DLS Parameters
Eluent refractive index	1
Eluent viscosity (P)	0.0089
DLS correlator run time (secs)	5
DLS Clip Time (µs)	100
DLS R²	0.4
Sample Channel Information
Channel ID	Detector type	Detector name	Detector units	Channel Information
1	RI	Trace0	mV

## Sheet: Raw Data
Sample Collection Parameters
Collected by	OBPC
Number of channels	1
Run length (mins)	30.0167
Delay time (secs)	0
Sampling interval (secs)	1
Number of data points	1801
Sample DLS Parameters
Eluent refractive index	1
Eluent viscosity (P)	0.0089
DLS correlator run time (secs)	5
DLS Clip Time (µs)	100
DLS R²	0.4
Sample Channel Information
Channel ID	Detector type	Detector name	Detector units	Channel Information
1	RI	Trace0	mV
Raw Data
RT (mins)	Response Trace 1
0	-2.19239
0.0166667	-2.21016
0.0333333	-2.23946
0.05	-2.23518
0.0666667	-2.22176
0.0833333	-2.20497
0.1	-2.20299
0.116667	-2.19078
0.133333	-2.19658
0.15	-2.19994
0.166667	-2.19048
0.183333	-2.21519
0.2	-2.20604
0.216667	-2.20558
0.233333	-2.20741
0.25	-2.20161
0.266667	-2.18925
0.283333	-2.20284
0.3	-2.18498
0.316667	-2.19063
0.333333	-2.18941
0.35	-2.1769
0.366667	-2.18971
0.383333	-2.18071
0.4	-2.19124
0.416667	-2.1801
0.433333	-2.16759
0.45	-2.17537
0.466667	-2.17232
0.483333	-2.16728
0.5	-2.16469
0.516667	-2.16866
0.533333	-2.17308
0.55	-2.17659
0.566667	-2.16042
0.583333	-2.18346
0.6	-2.1833
0.616667	-2.19078
0.633333	-2.19643
0.65	-2.22298
0.666667	-2.22298
0.683333	-2.22343
0.7	-2.22618
0.716667	-2.21718
0.733333	-2.21886
0.75	-2.2213
0.766667	-2.2303
0.783333	-2.21275
0.8	-2.22008
0.816667	-2.21901
0.833333	-2.22755
0.85	-2.22038
0.866667	-2.20161
0.883333	-2.19063
0.9	-2.17735
0.916667	-2.19521
0.933333	-2.19688
0.95	-2.19353
0.966667	-2.19643
0.983333	-2.19826
1	-2.19215
1.01667	-2.19261
1.03333	-2.18422
1.05	-2.18239
1.06667	-2.18987
1.08333	-2.18575
1.1	-2.18941
1.11667	-2.18925
1.13333	-2.19353
1.15	-2.19261
1.16667	-2.192
1.18333	-2.19856
1.2	-2.18666
1.21667	-2.19368
1.23333	-2.18269
1.25	-2.19704
1.26667	-2.1946
1.28333	-2.19475
1.3	-2.18819
1.31667	-2.18224
1.33333	-2.17445
1.35	-2.18575
1.36667	-2.19276
1.38333	-2.19383
1.4	-2.201
1.41667	-2.20039
1.43333	-2.20222
1.45	-2.18712
1.46667	-2.17537
1.48333	-2.17186
1.5	-2.18117
1.51667	-2.1891
1.53333	-2.19139
1.55	-2.17415
1.56667	-2.1743
1.58333	-2.17598
1.6	-2.18727
1.61667	-2.18651
1.63333	-2.1891
1.65	-2.19902
1.66667	-2.20284
1.68333	-2.18742
1.7	-2.16896
1.71667	-2.16835
1.73333	-2.1653
1.75	-2.18132
1.76667	-2.17766
1.78333	-2.16469
1.8	-2.17201
1.81667	-2.18346
1.83333	-2.18193
1.85	-2.19994
1.86667	-2.20421
1.88333	-2.20451
1.9	-2.20497
1.91667	-2.19917
1.93333	-2.1859
1.95	-2.18971
1.96667	-2.192
1.98333	-2.18178
2	-2.18941
2.01667	-2.18819
2.03333	-2.19765
2.05	-2.19765
2.06667	-2.16682
2.08333	-2.16789
2.1	-2.16087
2.11667	-2.16576
2.13333	-2.17308
2.15	-2.17369
2.16667	-2.17384
2.18333	-2.15034
2.2	-2.16255
2.21667	-2.1656
2.23333	-2.14943
2.25	-2.13905
2.26667	-2.13326
2.28333	-2.13387
2.3	-2.14333
2.31667	-2.17628
2.33333	-2.16545
2.35	-2.16545
2.36667	-2.16835
2.38333	-2.1534
2.4	-2.16042
2.41667	-2.15523
2.43333	-2.15233
2.45	-2.15416
2.46667	-2.16057
2.48333	-2.16576
2.5	-2.15675
2.51667	-2.16103
2.53333	-2.15492
2.55	-2.15874
2.56667	-2.17018
2.58333	-2.1772
2.6	-2.16942
2.61667	-2.16515
2.63333	-2.16652
2.65	-2.17384
2.66667	-2.1534
2.68333	-2.16316
2.7	-2.17964
2.71667	-2.18559
2.73333	-2.16957
2.75	-2.16072
2.76667	-2.15874
2.78333	-2.15797
2.8	-2.18681
2.81667	-2.17796
2.83333	-2.16362
2.85	-2.16499
2.86667	-2.17155
2.88333	-2.17888
2.9	-2.18224
2.91667	-2.18193
2.93333	-2.18056
2.95	-2.18147
2.96667	-2.19231
2.98333	-2.18437
3	-2.16682
3.01667	-2.16423
3.03333	-2.17918
3.05	-2.15706
3.06667	-2.15446
3.08333	-2.15157
3.1	-2.14256
3.11667	-2.15004
3.13333	-2.15248
3.15	-2.1389
3.16667	-2.16377
3.18333	-2.13982
3.2	-2.14684
3.21667	-2.15477
3.23333	-2.15431
3.25	-2.15431
3.26667	-2.13615
3.28333	-2.13081
3.3	-2.14073
3.31667	-2.14928
3.33333	-2.14394
3.35	-2.13905
3.36667	-2.13264
3.38333	-2.13707
3.4	-2.1476
3.41667	-2.14684
3.43333	-2.16652
3.45	-2.15828
3.46667	-2.14836
3.48333	-2.15584
3.5	-2.13554
3.51667	-2.11815
3.53333	-2.11052
3.55	-2.13448
3.56667	-2.11784
3.58333	-2.13005
3.6	-2.1328
3.61667	-2.12807
3.63333	-2.11983
3.65	-2.10915
3.66667	-2.12334
3.68333	-2.127
3.7	-2.12852
3.71667	-2.12914
3.73333	-2.12425
3.75	-2.1183
3.76667	-2.10487
3.78333	-2.10625
3.8	-2.11739
3.81667	-2.13203
3.83333	-2.11555
3.85	-2.12654
3.86667	-2.13264
3.88333	-2.11067
3.9	-2.10884
3.91667	-2.10747
3.93333	-2.11144
3.95	-2.11617
3.96667	-2.11647
3.98333	-2.10701
4	-2.10899
4.01667	-2.11098
4.03333	-2.12914
4.05	-2.12166
4.06667	-2.10167
4.08333	-2.0977
4.1	-2.08702
4.11667	-2.09236
4.13333	-2.10197
4.15	-2.09557
4.16667	-2.09801
4.18333	-2.10304
4.2	-2.10487
4.21667	-2.10503
4.23333	-2.11128
4.25	-2.10838
4.26667	-2.10381
4.28333	-2.10793
4.3	-2.11388
4.31667	-2.11708
4.33333	-2.12837
4.35	-2.12852
4.36667	-2.11433
4.38333	-2.11861
4.4	-2.1003
4.41667	-2.10228
4.43333	-2.09785
4.45	-2.10884
4.46667	-2.10014
4.48333	-2.10854
4.5	-2.11189
4.51667	-2.10808
4.53333	-2.10091
4.55	-2.11647
4.56667	-2.11555
4.58333	-2.11662
4.6	-2.12135
4.61667	-2.10945
4.63333	-2.1003
4.65	-2.09129
4.66667	-2.09618
4.68333	-2.09892
4.7	-2.10564
4.71667	-2.11174
4.73333	-2.1093
4.75	-2.09587
4.76667	-2.1003
4.78333	-2.10106
4.8	-2.09282
4.81667	-2.1032
4.83333	-2.11296
4.85	-2.09068
4.86667	-2.08672
4.88333	-2.11281
4.9	-2.09419
4.91667	-2.09312
4.93333	-2.10213
4.95	-2.09648
4.96667	-2.1096
4.98333	-2.11632
5	-2.12746
5.01667	-2.11906
5.03333	-2.11098
5.05	-2.12502
5.06667	-2.11296
5.08333	-2.10976
5.1	-2.11739
5.11667	-2.11342
5.13333	-2.09984
5.15	-2.10274
5.16667	-2.10411
5.18333	-2.1006
5.2	-2.10075
5.21667	-2.1067
5.23333	-2.1125
5.25	-2.10625
5.26667	-2.12227
5.28333	-2.11418
5.3	-2.13326
5.31667	-2.13036
5.33333	-2.11937
5.35	-2.11098
5.36667	-2.10335
5.38333	-2.10472
5.4	-2.10625
5.41667	-2.10136
5.43333	-2.10167
5.45	-2.10182
5.46667	-2.11876
5.48333	-2.11906
5.5	-2.09938
5.51667	-2.09633
5.53333	-2.08855
5.55	-2.08153
5.56667	-2.09541
5.58333	-2.09587
5.6	-2.09663
5.61667	-2.08519
5.63333	-2.09267
5.65	-2.09801
5.66667	-2.0887
5.68333	-2.0826
5.7	-2.08138
5.71667	-2.09633
5.73333	-2.11372
5.75	-2.10426
5.76667	-2.09724
5.78333	-2.0948
5.8	-2.0887
5.81667	-2.08977
5.83333	-2.09648
5.85	-2.10304
5.86667	-2.10167
5.88333	-2.09755
5.9	-2.09389
5.91667	-2.08763
5.93333	-2.05894
5.95	-2.07573
5.96667	-2.07283
5.98333	-2.06978
6	-2.07741
6.01667	-2.08458
6.03333	-2.08138
6.05	-2.08626
6.06667	-2.10335
6.08333	-2.09694
6.1	-2.09969
6.11667	-2.1093
6.13333	-2.10411
6.15	-2.09618
6.16667	-2.09801
6.18333	-2.12029
6.2	-2.08748
6.21667	-2.09312
6.23333	-2.10976
6.25	-2.1067
6.26667	-2.10594
6.28333	-2.10579
6.3	-2.09267
6.31667	-2.09328
6.33333	-2.10564
6.35	-2.10045
6.36667	-2.1093
6.38333	-2.11494
6.4	-2.1125
6.41667	-2.11754
6.43333	-2.12181
6.45	-2.11113
6.46667	-2.10121
6.48333	-2.10121
6.5	-2.09557
6.51667	-2.09312
6.53333	-2.1035
6.55	-2.09114
6.56667	-2.08931
6.58333	-2.09236
6.6	-2.10762
6.61667	-2.10793
6.63333	-2.10625
6.65	-2.08122
6.66667	-2.07817
6.68333	-2.09984
6.7	-2.10335
6.71667	-2.10365
6.73333	-2.0858
6.75	-2.08611
6.76667	-2.09129
6.78333	-2.09129
6.8	-2.10304
6.81667	-2.09694
6.83333	-2.09023
6.85	-2.09267
6.86667	-2.09801
6.88333	-2.08977
6.9	-2.09419
6.91667	-2.09343
6.93333	-2.09877
6.95	-2.10182
6.96667	-2.09831
6.98333	-2.11311
7	-2.1003
7.01667	-2.09526
7.03333	-2.0977
7.05	-2.10777
7.06667	-2.10701
7.08333	-2.1183
7.1	-2.10442
7.11667	-2.10045
7.13333	-2.11235
7.15	-2.1003
7.16667	-2.09206
7.18333	-2.07695
7.2	-2.08092
7.21667	-2.07787
7.23333	-2.08046
7.25	-2.08351
7.26667	-2.06474
7.28333	-2.09526
7.3	-2.08473
7.31667	-2.09053
7.33333	-2.08061
7.35	-2.08473
7.36667	-2.07985
7.38333	-2.08534
7.4	-2.07848
7.41667	-2.07863
7.43333	-2.08107
7.45	-2.06978
7.46667	-2.07039
7.48333	-2.08183
7.5	-2.0797
7.51667	-2.0739
7.53333	-2.07756
7.55	-2.07848
7.56667	-2.08946
7.58333	-2.08488
7.6	-2.08733
7.61667	-2.07924
7.63333	-2.06993
7.65	-2.05971
7.66667	-2.06779
7.68333	-2.06352
7.7	-2.07359
7.71667	-2.09694
7.73333	-2.09648
7.75	-2.089
7.76667	-2.07603
7.78333	-2.07558
7.8	-2.07603
7.81667	-2.08153
7.83333	-2.07726
7.85	-2.10075
7.86667	-2.09572
7.88333	-2.08595
7.9	-2.08153
7.91667	-2.07756
7.93333	-2.0652
7.95	-2.07298
7.96667	-2.06474
7.98333	-2.08427
8	-2.0681
8.01667	-2.06917
8.03333	-2.07634
8.05	-2.07359
8.06667	-2.07527
8.08333	-2.06505
8.1	-2.06368
8.11667	-2.0742
8.13333	-2.08427
8.15	-2.08351
8.16667	-2.08763
8.18333	-2.07069
8.2	-2.07695
8.21667	-2.07817
8.23333	-2.07588
8.25	-2.06551
8.26667	-2.07985
8.28333	-2.06368
8.3	-2.05742
8.31667	-2.08244
8.33333	-2.06993
8.35	-2.06856
8.36667	-2.08092
8.38333	-2.09465
8.4	-2.07817
8.41667	-2.07314
8.43333	-2.089
8.45	-2.07726
8.46667	-2.08336
8.48333	-2.09251
8.5	-2.08565
8.51667	-2.08488
8.53333	-2.09068
8.55	-2.09267
8.56667	-2.09953
8.58333	-2.089
8.6	-2.08138
8.61667	-2.1032
8.63333	-2.08946
8.65	-2.09297
8.66667	-2.07802
8.68333	-2.08382
8.7	-2.09221
8.71667	-2.10747
8.73333	-2.09847
8.75	-2.08061
8.76667	-2.10014
8.78333	-2.10701
8.8	-2.09114
8.81667	-2.07024
8.83333	-2.07542
8.85	-2.09862
8.86667	-2.10976
8.88333	-2.09068
8.9	-2.07665
8.91667	-2.08504
8.93333	-2.07405
8.95	-2.06841
8.96667	-2.06795
8.98333	-2.06749
9	-2.06444
9.01667	-2.06779
9.03333	-2.07191
9.05	-2.07161
9.06667	-2.06093
9.08333	-2.06123
9.1	-2.07253
9.11667	-2.06993
9.13333	-2.07237
9.15	-2.07481
9.16667	-2.07787
9.18333	-2.08229
9.2	-2.07069
9.21667	-2.09572
9.23333	-2.0858
9.25	-2.08778
9.26667	-2.08199
9.28333	-2.08183
9.3	-2.089
9.31667	-2.0797
9.33333	-2.06291
9.35	-2.06566
9.36667	-2.0536
9.38333	-2.05528
9.4	-2.06352
9.41667	-2.06963
9.43333	-2.08565
9.45	-2.07558
9.46667	-2.08046
9.48333	-2.08702
9.5	-2.08351
9.51667	-2.07756
9.53333	-2.07619
9.55	-2.07512
9.56667	-2.08687
9.58333	-2.0826
9.6	-2.07039
9.61667	-2.07039
9.63333	-2.07222
9.65	-2.07939
9.66667	-2.05406
9.68333	-2.07603
9.7	-2.0713
9.71667	-2.06413
9.73333	-2.07985
9.75	-2.07222
9.76667	-2.07115
9.78333	-2.08702
9.8	-2.0826
9.81667	-2.07085
9.83333	-2.0713
9.85	-2.07802
9.86667	-2.08611
9.88333	-2.07863
9.9	-2.07573
9.91667	-2.09343
9.93333	-2.09221
9.95	-2.08824
9.96667	-2.09663
9.98333	-2.10258
10	-2.08168
10.0167	-2.06841
10.0333	-2.07268
10.05	-2.09099
10.0667	-2.09541
10.0833	-2.08122
10.1	-2.08427
10.1167	-2.08931
10.1333	-2.09709
10.15	-2.09923
10.1667	-2.12059
10.1833	-2.12517
10.2	-2.13203
10.2167	-2.11861
10.2333	-2.11601
10.25	-2.1183
10.2667	-2.11937
10.2833	-2.11815
10.3	-2.14088
10.3167	-2.13158
10.3333	-2.10609
10.35	-2.11113
10.3667	-2.13661
10.3833	-2.12273
10.4	-2.12379
10.4167	-2.14775
10.4333	-2.14729
10.45	-2.13051
10.4667	-2.14333
10.4833	-2.15431
10.5	-2.14943
10.5167	-2.15263
10.5333	-2.14928
10.55	-2.13615
10.5667	-2.13768
10.5833	-2.1508
10.6	-2.14653
10.6167	-2.13951
10.6333	-2.16118
10.65	-2.16591
10.6667	-2.17323
10.6833	-2.18819
10.7	-2.18117
10.7167	-2.18132
10.7333	-2.19322
10.75	-2.19231
10.7667	-2.17949
10.7833	-2.18605
10.8	-2.19002
10.8167	-2.21092
10.8333	-2.19963
10.85	-2.19582
10.8667	-2.21001
10.8833	-2.21779
10.9	-2.22481
10.9167	-2.239
10.9333	-2.25273
10.95	-2.2599
10.9667	-2.26769
10.9833	-2.27379
11	-2.28966
11.0167	-2.30141
11.0333	-2.31056
11.05	-2.31117
11.0667	-2.32674
11.0833	-2.32353
11.1	-2.33162
11.1167	-2.34322
11.1333	-2.34627
11.15	-2.35756
11.1667	-2.36458
11.1833	-2.38029
11.2	-2.38945
11.2167	-2.38777
11.2333	-2.39922
11.25	-2.39922
11.2667	-2.42485
11.2833	-2.44804
11.3	-2.44911
11.3167	-2.45934
11.3333	-2.48817
11.35	-2.50496
11.3667	-2.49809
11.3833	-2.519
11.4	-2.53609
11.4167	-2.5573
11.4333	-2.57774
11.45	-2.60292
11.4667	-2.64839
11.4833	-2.63924
11.5	-2.6783
11.5167	-2.73537
11.5333	-2.73964
11.55	-2.76466
11.5667	-2.79701
11.5833	-2.82799
11.6	-2.84355
11.6167	-2.89589
11.6333	-2.9464
11.65	-2.97966
11.6667	-3.00224
11.6833	-3.04863
11.7	-3.09105
11.7167	-3.13545
11.7333	-3.1768
11.75	-3.22197
11.7667	-3.27232
11.7833	-3.32588
11.8	-3.36464
11.8167	-3.39317
11.8333	-3.44505
11.85	-3.50136
11.8667	-3.55598
11.8833	-3.61092
11.9	-3.65288
11.9167	-3.69667
11.9333	-3.7487
11.95	-3.79936
11.9667	-3.843
11.9833	-3.87795
12	-3.93639
12.0167	-3.9695
12.0333	-4.01985
12.05	-4.07188
12.0667	-4.11705
12.0833	-4.16222
12.1	-4.22997
12.1167	-4.27254
12.1333	-4.31206
12.15	-4.38255
12.1667	-4.44664
12.1833	-4.48494
12.2	-4.53972
12.2167	-4.61739
12.2333	-4.66438
12.25	-4.73198
12.2667	-4.7921
12.2833	-4.84322
12.3	-4.89433
12.3167	-4.95033
12.3333	-5.0074
12.35	-5.05867
12.3667	-5.10033
12.3833	-5.18028
12.4	-5.23018
12.4167	-5.28069
12.4333	-5.32982
12.45	-5.364
12.4667	-5.4229
12.4833	-5.48912
12.5	-5.52666
12.5167	-5.57411
12.5333	-5.63988
12.55	-5.68703
12.5667	-5.71999
12.5833	-5.76622
12.6	-5.80833
12.6167	-5.84374
12.6333	-5.87212
12.65	-5.92201
12.6667	-5.9832
12.6833	-6.00594
12.7	-6.04271
12.7167	-6.0601
12.7333	-6.0923
12.75	-6.14723
12.7667	-6.1631
12.7833	-6.16859
12.8	-6.2011
12.8167	-6.23146
12.8333	-6.26167
12.85	-6.26869
12.8667	-6.27068
12.8833	-6.28777
12.9	-6.29463
12.9167	-6.31279
12.9333	-6.31828
12.95	-6.32042
12.9667	-6.33492
12.9833	-6.34468
13	-6.35292
13.0167	-6.34728
13.0333	-6.34605
13.05	-6.34575
13.0667	-6.34422
13.0833	-6.33614
13.1	-6.32652
13.1167	-6.3015
13.1333	-6.30318
13.15	-6.2925
13.1667	-6.27449
13.1833	-6.26915
13.2	-6.22932
13.2167	-6.22398
13.2333	-6.19881
13.25	-6.18019
13.2667	-6.15379
13.2833	-6.13838
13.3	-6.1158
13.3167	-6.08604
13.3333	-6.05461
13.35	-6.03279
13.3667	-6.00304
13.3833	-5.99541
13.4	-5.96214
13.4167	-5.92827
13.4333	-5.8979
13.45	-5.86647
13.4667	-5.85884
13.4833	-5.83382
13.5	-5.81718
13.5167	-5.79201
13.5333	-5.75462
13.55	-5.73463
13.5667	-5.70763
13.5833	-5.67207
13.6	-5.6411
13.6167	-5.61073
13.6333	-5.579
13.65	-5.54253
13.6667	-5.51933
13.6833	-5.49416
13.7	-5.46394
13.7167	-5.42564
13.7333	-5.39009
13.75	-5.36125
13.7667	-5.32845
13.7833	-5.29564
13.8	-5.26741
13.8167	-5.22728
13.8333	-5.18318
13.85	-5.15907
13.8667	-5.12657
13.8833	-5.09682
13.9	-5.06355
13.9167	-5.02602
13.9333	-4.97231
13.95	-4.93538
13.9667	-4.90715
13.9833	-4.87984
14	-4.84901
14.0167	-4.82323
14.0333	-4.77547
14.05	-4.73564
14.0667	-4.69978
14.0833	-4.68102
14.1	-4.63539
14.1167	-4.58473
14.1333	-4.56734
14.15	-4.52461
14.1667	-4.48799
14.1833	-4.47044
14.2	-4.45045
14.2167	-4.41032
14.2333	-4.394
14.25	-4.36501
14.2667	-4.32243
14.2833	-4.27834
14.3	-4.24767
14.3167	-4.21608
14.3333	-4.18083
14.35	-4.14406
14.3667	-4.11858
14.3833	-4.07738
14.4	-4.04045
14.4167	-4.0136
14.4333	-3.99376
14.45	-3.97621
14.4667	-3.92647
14.4833	-3.90251
14.5	-3.85201
14.5167	-3.82744
14.5333	-3.8044
14.55	-3.76122
14.5667	-3.73329
14.5833	-3.69972
14.6	-3.67775
14.6167	-3.65196
14.6333	-3.60542
14.65	-3.58986
14.6667	-3.57414
14.6833	-3.55507
14.7	-3.52608
14.7167	-3.507
14.7333	-3.49052
14.75	-3.44704
14.7667	-3.43727
14.7833	-3.42125
14.8	-3.39912
14.8167	-3.37105
14.8333	-3.35838
14.85	-3.34465
14.8667	-3.3242
14.8833	-3.3036
14.9	-3.28407
14.9167	-3.27126
14.9333	-3.25371
14.95	-3.22823
14.9667	-3.18474
14.9833	-3.18474
15	-3.16994
15.0167	-3.15178
15.0333	-3.11485
15.05	-3.11211
15.0667	-3.11668
15.0833	-3.09395
15.1	-3.07503
15.1167	-3.07961
15.1333	-3.0584
15.15	-3.0262
15.1667	-3.01323
15.1833	-2.98134
15.2	-2.9493
15.2167	-2.95982
15.2333	-2.94121
15.25	-2.92595
15.2667	-2.91267
15.2833	-2.89513
15.3	-2.88811
15.3167	-2.86446
15.3333	-2.86263
15.35	-2.84767
15.3667	-2.8289
15.3833	-2.83211
15.4	-2.8196
15.4167	-2.79594
15.4333	-2.76894
15.45	-2.76009
15.4667	-2.75856
15.4833	-2.73857
15.5	-2.71858
15.5167	-2.70256
15.5333	-2.72591
15.55	-2.68669
15.5667	-2.67052
15.5833	-2.67174
15.6	-2.67708
15.6167	-2.66914
15.6333	-2.65312
15.65	-2.64366
15.6667	-2.62932
15.6833	-2.62947
15.7	-2.62108
15.7167	-2.62428
15.7333	-2.6075
15.75	-2.59834
15.7667	-2.5782
15.7833	-2.59499
15.8	-2.60353
15.8167	-2.59895
15.8333	-2.59071
15.85	-2.57271
15.8667	-2.58598
15.8833	-2.5872
15.9	-2.57164
15.9167	-2.55928
15.9333	-2.55089
15.95	-2.5367
15.9667	-2.53471
15.9833	-2.54051
16	-2.52464
16.0167	-2.51778
16.0333	-2.50587
16.05	-2.51656
16.0667	-2.52113
16.0833	-2.5071
16.1	-2.50298
16.1167	-2.49367
16.1333	-2.47612
16.15	-2.48619
16.1667	-2.48528
16.1833	-2.48772
16.2	-2.4807
16.2167	-2.45735
16.2333	-2.46193
16.25	-2.4543
16.2667	-2.44514
16.2833	-2.43309
16.3	-2.43294
16.3167	-2.43416
16.3333	-2.43126
16.35	-2.43187
16.3667	-2.42729
16.3833	-2.41325
16.4	-2.40135
16.4167	-2.4189
16.4333	-2.42317
16.45	-2.40257
16.4667	-2.39738
16.4833	-2.39494
16.5	-2.39403
16.5167	-2.39372
16.5333	-2.39189
16.55	-2.39616
16.5667	-2.40791
16.5833	-2.40379
16.6	-2.41386
16.6167	-2.39967
16.6333	-2.40578
16.65	-2.40227
16.6667	-2.4102
16.6833	-2.39403
16.7	-2.39098
16.7167	-2.38289
16.7333	-2.37007
16.75	-2.37877
16.7667	-2.38441
16.7833	-2.3867
16.8	-2.39098
16.8167	-2.3777
16.8333	-2.36961
16.85	-2.36961
16.8667	-2.3774
16.8833	-2.38182
16.9	-2.39265
16.9167	-2.40166
16.9333	-2.38136
16.95	-2.39738
16.9667	-2.3745
16.9833	-2.38228
17	-2.38426
17.0167	-2.38564
17.0333	-2.37389
17.05	-2.36488
17.0667	-2.35985
17.0833	-2.36443
17.1	-2.35664
17.1167	-2.35176
17.1333	-2.35359
17.15	-2.34673
17.1667	-2.37724
17.1833	-2.36336
17.2	-2.36168
17.2167	-2.37846
17.2333	-2.40257
17.25	-2.38945
17.2667	-2.37877
17.2833	-2.37099
17.3	-2.37968
17.3167	-2.37083
17.3333	-2.38518
17.35	-2.38518
17.3667	-2.40593
17.3833	-2.3983
17.4	-2.39174
17.4167	-2.39677
17.4333	-2.40715
17.45	-2.40044
17.4667	-2.39021
17.4833	-2.38228
17.5	-2.38579
17.5167	-2.37434
17.5333	-2.38091
17.55	-2.38716
17.5667	-2.37251
17.5833	-2.35634
17.6	-2.3748
17.6167	-2.37007
17.6333	-2.36443
17.65	-2.36092
17.6667	-2.35283
17.6833	-2.35085
17.7	-2.35817
17.7167	-2.34886
17.7333	-2.34337
17.75	-2.34428
17.7667	-2.33681
17.7833	-2.35039
17.8	-2.34673
17.8167	-2.33681
17.8333	-2.33818
17.85	-2.34154
17.8667	-2.35725
17.8833	-2.36534
17.9	-2.36107
17.9167	-2.35954
17.9333	-2.36015
17.95	-2.3867
17.9667	-2.37526
17.9833	-2.37862
18	-2.39128
18.0167	-2.39342
18.0333	-2.37877
18.05	-2.38945
18.0667	-2.39555
18.0833	-2.39479
18.1	-2.41951
18.1167	-2.42104
18.1333	-2.41707
18.15	-2.42867
18.1667	-2.4334
18.1833	-2.44179
18.2	-2.45445
18.2167	-2.44392
18.2333	-2.43401
18.25	-2.44164
18.2667	-2.45003
18.2833	-2.44087
18.3	-2.44896
18.3167	-2.44362
18.3333	-2.43019
18.35	-2.42592
18.3667	-2.40517
18.3833	-2.40639
18.4	-2.41081
18.4167	-2.41173
18.4333	-2.40974
18.45	-2.40547
18.4667	-2.42027
18.4833	-2.42821
18.5	-2.44011
18.5167	-2.41814
18.5333	-2.38762
18.55	-2.37434
18.5667	-2.36702
18.5833	-2.38106
18.6	-2.38213
18.6167	-2.38716
18.6333	-2.38121
18.65	-2.38686
18.6667	-2.38762
18.6833	-2.37114
18.7	-2.36244
18.7167	-2.35329
18.7333	-2.35588
18.75	-2.35298
18.7667	-2.34627
18.7833	-2.34459
18.8	-2.32445
18.8167	-2.31041
18.8333	-2.32048
18.85	-2.30461
18.8667	-2.29286
18.8833	-2.2776
18.9	-2.27272
18.9167	-2.2654
18.9333	-2.24587
18.95	-2.2274
18.9667	-2.21031
18.9833	-2.18346
19	-2.17812
19.0167	-2.17125
19.0333	-2.14989
19.05	-2.13356
19.0667	-2.12425
19.0833	-2.11388
19.1	-2.11082
19.1167	-2.09099
19.1333	-2.08977
19.15	-2.1093
19.1667	-2.10167
19.1833	-2.09282
19.2	-2.09007
19.2167	-2.08397
19.2333	-2.09099
19.25	-2.09328
19.2667	-2.06581
19.2833	-2.0649
19.3	-2.0594
19.3167	-2.03743
19.3333	-2.02431
19.35	-2.015
19.3667	-1.99699
19.3833	-1.97151
19.4	-1.9352
19.4167	-1.90437
19.4333	-1.8679
19.45	-1.86668
19.4667	-1.79222
19.4833	-1.73943
19.5	-1.66069
19.5167	-1.58134
19.5333	-1.50398
19.55	-1.3987
19.5667	-1.3105
19.5833	-1.20003
19.6	-1.07475
19.6167	-0.959549
19.6333	-0.815048
19.65	-0.6884
19.6667	-0.55687
19.6833	-0.399551
19.7	-0.286636
19.7167	-0.182419
19.7333	-0.0849152
19.75	-0.016098
19.7667	0.044632
19.7833	0.0684357
19.8	0.0673676
19.8167	0.042038
19.8333	0.000534058
19.85	-0.0441742
19.8667	-0.107803
19.8833	-0.202103
19.9	-0.309677
19.9167	-0.386429
19.9333	-0.512466
19.95	-0.622177
19.9667	-0.723343
19.9833	-0.847702
20	-0.959549
20.0167	-1.06651
20.0333	-1.16539
20.05	-1.25511
20.0667	-1.35536
20.0833	-1.4193
20.1	-1.48674
20.1167	-1.57784
20.1333	-1.65901
20.15	-1.735
20.1667	-1.81404
20.1833	-1.90331
20.2	-2.01347
20.2167	-2.11693
20.2333	-2.24464
20.25	-2.3806
20.2667	-2.54707
20.2833	-2.73186
20.3	-2.94045
20.3167	-3.18245
20.3333	-3.47343
20.35	-3.80211
20.3667	-4.19487
20.3833	-4.59908
20.4	-5.04036
20.4167	-5.52834
20.4333	-6.05965
20.45	-6.63124
20.4667	-7.22099
20.4833	-7.82738
20.5	-8.45573
20.5167	-9.06654
20.5333	-9.67369
20.55	-10.2618
20.5667	-10.8295
20.5833	-11.352
20.6	-11.8153
20.6167	-12.2272
20.6333	-12.5762
20.65	-12.8388
20.6667	-13.0573
20.6833	-13.1933
20.7	-13.2584
20.7167	-13.251
20.7333	-13.1847
20.75	-13.0929
20.7667	-12.9078
20.7833	-12.678
20.8	-12.4366
20.8167	-12.1865
20.8333	-11.8963
20.85	-11.5992
20.8667	-11.3075
20.8833	-11.0171
20.9	-10.7145
20.9167	-10.4624
20.9333	-10.1797
20.95	-9.91585
20.9667	-9.67354
20.9833	-9.44405
21	-9.20876
21.0167	-9.02077
21.0333	-8.80333
21.05	-8.6042
21.0667	-8.40416
21.0833	-8.22777
21.1	-8.01811
21.1167	-7.81014
21.1333	-7.6075
21.15	-7.39128
21.1667	-7.20299
21.1833	-6.99913
21.2	-6.80077
21.2167	-6.60103
21.2333	-6.41029
21.25	-6.22856
21.2667	-6.04637
21.2833	-5.86372
21.3	-5.70168
21.3167	-5.53703
21.3333	-5.36476
21.35	-5.22392
21.3667	-5.06874
21.3833	-4.93492
21.4	-4.80721
21.4167	-4.70879
21.4333	-4.59694
21.45	-4.49944
21.4667	-4.39064
21.4833	-4.29146
21.5	-4.21364
21.5167	-4.1465
21.5333	-4.07402
21.55	-4.01268
21.5667	-3.95485
21.5833	-3.86513
21.6	-3.82225
21.6167	-3.76717
21.6333	-3.72765
21.65	-3.67943
21.6667	-3.64006
21.6833	-3.58665
21.7	-3.52974
21.7167	-3.49571
21.7333	-3.46336
21.75	-3.43269
21.7667	-3.40523
21.7833	-3.37425
21.8	-3.34724
21.8167	-3.29826
21.8333	-3.26653
21.85	-3.24455
21.8667	-3.23463
21.8833	-3.18733
21.9	-3.17833
21.9167	-3.16765
21.9333	-3.14552
21.95	-3.12355
21.9667	-3.10631
21.9833	-3.06709
22	-3.03459
22.0167	-3.03337
22.0333	-3.01796
22.05	-3.01231
22.0667	-3.00453
22.0833	-2.98729
22.1	-2.97951
22.1167	-2.96669
22.1333	-2.9821
22.15	-2.94762
22.1667	-2.93373
22.1833	-2.91466
22.2	-2.89131
22.2167	-2.88841
22.2333	-2.87987
22.25	-2.86201
22.2667	-2.84645
22.2833	-2.84599
22.3	-2.84447
22.3167	-2.84477
22.3333	-2.83821
22.35	-2.8196
22.3667	-2.81364
22.3833	-2.79579
22.4	-2.79793
22.4167	-2.7813
22.4333	-2.77458
22.45	-2.76772
22.4667	-2.76955
22.4833	-2.7639
22.5	-2.77245
22.5167	-2.77321
22.5333	-2.7758
22.55	-2.7552
22.5667	-2.74681
22.5833	-2.72728
22.6	-2.73872
22.6167	-2.74025
22.6333	-2.72148
22.65	-2.70973
22.6667	-2.70592
22.6833	-2.71065
22.7	-2.69829
22.7167	-2.6963
22.7333	-2.71797
22.75	-2.71462
22.7667	-2.69112
22.7833	-2.69051
22.8	-2.68257
22.8167	-2.68471
22.8333	-2.68623
22.85	-2.68959
22.8667	-2.67235
22.8833	-2.65923
22.9	-2.65755
22.9167	-2.66243
22.9333	-2.66655
22.95	-2.6548
22.9667	-2.63481
22.9833	-2.63588
23	-2.6223
23.0167	-2.62703
23.0333	-2.62291
23.05	-2.62367
23.0667	-2.61375
23.0833	-2.62398
23.1	-2.61696
23.1167	-2.6226
23.1333	-2.61391
23.15	-2.61498
23.1667	-2.60231
23.1833	-2.59804
23.2	-2.58797
23.2167	-2.57042
23.2333	-2.58522
23.25	-2.60262
23.2667	-2.5901
23.2833	-2.575
23.3	-2.58034
23.3167	-2.5843
23.3333	-2.58385
23.35	-2.58263
23.3667	-2.57225
23.3833	-2.575
23.4	-2.57118
23.4167	-2.57347
23.4333	-2.57469
23.45	-2.58308
23.4667	-2.56447
23.4833	-2.57378
23.5	-2.55898
23.5167	-2.56218
23.5333	-2.56996
23.55	-2.55379
23.5667	-2.53868
23.5833	-2.52968
23.6	-2.53685
23.6167	-2.53792
23.6333	-2.55394
23.65	-2.54555
23.6667	-2.54128
23.6833	-2.53563
23.7	-2.52678
23.7167	-2.52174
23.7333	-2.52342
23.75	-2.51762
23.7667	-2.53258
23.7833	-2.52007
23.8	-2.53944
23.8167	-2.52937
23.8333	-2.50313
23.85	-2.52098
23.8667	-2.5161
23.8833	-2.52876
23.9	-2.52235
23.9167	-2.50725
23.9333	-2.49977
23.95	-2.48543
23.9667	-2.50359
23.9833	-2.50679
24	-2.53517
24.0167	-2.54143
24.0333	-2.54387
24.05	-2.52663
24.0667	-2.51701
24.0833	-2.51381
24.1	-2.51625
24.1167	-2.51015
24.1333	-2.51472
24.15	-2.51381
24.1667	-2.52815
24.1833	-2.54036
24.2	-2.54753
24.2167	-2.51884
24.2333	-2.51457
24.25	-2.50175
24.2667	-2.50862
24.2833	-2.50649
24.3	-2.51442
24.3167	-2.52892
24.3333	-2.52617
24.35	-2.52464
24.3667	-2.5219
24.3833	-2.52815
24.4	-2.52769
24.4167	-2.50832
24.4333	-2.52251
24.45	-2.54631
24.4667	-2.52754
24.4833	-2.52022
24.5	-2.51366
24.5167	-2.51122
24.5333	-2.52373
24.55	-2.51961
24.5667	-2.52357
24.5833	-2.52052
24.6	-2.51335
24.6167	-2.51305
24.6333	-2.50908
24.65	-2.50221
24.6667	-2.52144
24.6833	-2.5135
24.7	-2.51305
24.7167	-2.51198
24.7333	-2.5103
24.75	-2.51015
24.7667	-2.52052
24.7833	-2.51991
24.8	-2.51076
24.8167	-2.52693
24.8333	-2.53075
24.85	-2.51442
24.8667	-2.5164
24.8833	-2.52083
24.9	-2.5045
24.9167	-2.49901
24.9333	-2.49764
24.95	-2.49397
24.9667	-2.50023
24.9833	-2.519
25	-2.51961
25.0167	-2.51518
25.0333	-2.51061
25.05	-2.51656
25.0667	-2.51671
25.0833	-2.4987
25.1	-2.49001
25.1167	-2.48589
25.1333	-2.48512
25.15	-2.48756
25.1667	-2.49764
25.1833	-2.5071
25.2	-2.5132
25.2167	-2.49458
25.2333	-2.49733
25.25	-2.50206
25.2667	-2.50679
25.2833	-2.50999
25.3	-2.49886
25.3167	-2.50847
25.3333	-2.49672
25.35	-2.49794
25.3667	-2.48329
25.3833	-2.50664
25.4	-2.5013
25.4167	-2.51061
25.4333	-2.51976
25.45	-2.49367
25.4667	-2.47383
25.4833	-2.48863
25.5	-2.47444
25.5167	-2.46727
25.5333	-2.48482
25.55	-2.46574
25.5667	-2.45598
25.5833	-2.47856
25.6	-2.49001
25.6167	-2.48756
25.6333	-2.47353
25.65	-2.47032
25.6667	-2.46941
25.6833	-2.4662
25.7	-2.47429
25.7167	-2.47093
25.7333	-2.47948
25.75	-2.48833
25.7667	-2.47108
25.7833	-2.46147
25.8	-2.47856
25.8167	-2.46071
25.8333	-2.48405
25.85	-2.49031
25.8667	-2.48695
25.8833	-2.4839
25.9	-2.50175
25.9167	-2.50237
25.9333	-2.50969
25.95	-2.49947
25.9667	-2.51152
25.9833	-2.51289
26	-2.49275
26.0167	-2.48772
26.0333	-2.48314
26.05	-2.48665
26.0667	-2.4955
26.0833	-2.48878
26.1	-2.48619
26.1167	-2.48177
26.1333	-2.4839
26.15	-2.4894
26.1667	-2.49611
26.1833	-2.49916
26.2	-2.50069
26.2167	-2.49199
26.2333	-2.48024
26.25	-2.48222
26.2667	-2.48878
26.2833	-2.47261
26.3	-2.48253
26.3167	-2.48344
26.3333	-2.48955
26.35	-2.47993
26.3667	-2.48695
26.3833	-2.49809
26.4	-2.48756
26.4167	-2.47627
26.4333	-2.4717
26.45	-2.47856
26.4667	-2.46574
26.4833	-2.46254
26.5	-2.45918
26.5167	-2.45995
26.5333	-2.46239
26.55	-2.4868
26.5667	-2.48741
26.5833	-2.46086
26.6	-2.4482
26.6167	-2.45613
26.6333	-2.48024
26.65	-2.48772
26.6667	-2.48863
26.6833	-2.4688
26.7	-2.47856
26.7167	-2.46391
26.7333	-2.44881
26.75	-2.45049
26.7667	-2.44789
26.7833	-2.42943
26.8	-2.42165
26.8167	-2.41402
26.8333	-2.41936
26.85	-2.41631
26.8667	-2.41035
26.8833	-2.39815
26.9	-2.41447
26.9167	-2.38808
26.9333	-2.37602
26.95	-2.37373
26.9667	-2.35786
26.9833	-2.34306
27	-2.32277
27.0167	-2.30461
27.0333	-2.27455
27.05	-2.2303
27.0667	-2.2245
27.0833	-2.18788
27.1	-2.13951
27.1167	-2.09953
27.1333	-2.0533
27.15	-2.01088
27.1667	-1.95885
27.1833	-1.9236
27.2	-1.84746
27.2167	-1.79222
27.2333	-1.74049
27.25	-1.6555
27.2667	-1.58943
27.2833	-1.50993
27.3	-1.42082
27.3167	-1.32866
27.3333	-1.23772
27.35	-1.15456
27.3667	-1.06712
27.3833	-0.981674
27.4	-0.885849
27.4167	-0.799942
27.4333	-0.699692
27.45	-0.617294
27.4667	-0.548019
27.4833	-0.441818
27.5	-0.354843
27.5167	-0.292282
27.5333	-0.201187
27.55	-0.131302
27.5667	-0.0632477
27.5833	-0.00679016
27.6	0.0415802
27.6167	0.0841522
27.6333	0.115891
27.65	0.13649
27.6667	0.16243
27.6833	0.20256
27.7	0.205307
27.7167	0.219955
27.7333	0.216446
27.75	0.189896
27.7667	0.148087
27.7833	0.150986
27.8	0.116043
27.8167	0.0762177
27.8333	0.0261688
27.85	-0.0313568
27.8667	-0.0896454
27.8833	-0.128708
27.9	-0.186234
27.9167	-0.261917
27.9333	-0.319901
27.95	-0.380173
27.9667	-0.437241
27.9833	-0.503616
28	-0.557785
28.0167	-0.631943
28.0333	-0.690994
28.05	-0.760727
28.0667	-0.835495
28.0833	-0.862351
28.1	-0.929337
28.1167	-0.994644
28.1333	-1.03233
28.15	-1.08665
28.1667	-1.14647
28.1833	-1.18782
28.2	-1.23573
28.2167	-1.29051
28.2333	-1.33492
28.25	-1.37428
28.2667	-1.41228
28.2833	-1.43623
28.3	-1.47713
28.3167	-1.51192
28.3333	-1.53725
28.35	-1.57906
28.3667	-1.58424
28.3833	-1.60698
28.4	-1.63475
28.4167	-1.66222
28.4333	-1.68922
28.45	-1.70998
28.4667	-1.71364
28.4833	-1.72386
28.5	-1.75316
28.5167	-1.77559
28.5333	-1.78825
28.55	-1.79649
28.5667	-1.81404
28.5833	-1.84181
28.6	-1.85982
28.6167	-1.86119
28.6333	-1.87828
28.65	-1.88377
28.6667	-1.9146
28.6833	-1.90727
28.7	-1.91902
28.7167	-1.93001
28.7333	-1.92619
28.75	-1.93932
28.7667	-1.96434
28.7833	-1.98555
28.8	-1.97655
28.8167	-1.98631
28.8333	-1.99898
28.85	-2.00096
28.8667	-2.00401
28.8833	-2.01592
28.9	-2.02263
28.9167	-2.02248
28.9333	-2.03545
28.95	-2.04262
28.9667	-2.07985
28.9833	-2.07329
29	-2.07359
29.0167	-2.07817
29.0333	-2.09847
29.05	-2.10701
29.0667	-2.0887
29.0833	-2.10777
29.1	-2.12288
29.1167	-2.14211
29.1333	-2.12746
29.15	-2.13768
29.1667	-2.14256
29.1833	-2.14119
29.2	-2.13844
29.2167	-2.15874
29.2333	-2.1772
29.25	-2.18239
29.2667	-2.1804
29.2833	-2.17918
29.3	-2.18941
29.3167	-2.19734
29.3333	-2.20985
29.35	-2.21703
29.3667	-2.21062
29.3833	-2.21504
29.4	-2.23183
29.4167	-2.24342
29.4333	-2.24602
29.45	-2.28172
29.4667	-2.27318
29.4833	-2.26295
29.5	-2.27852
29.5167	-2.2654
29.5333	-2.26311
29.55	-2.26738
29.5667	-2.26097
29.5833	-2.26845
29.6	-2.26967
29.6167	-2.26555
29.6333	-2.28096
29.65	-2.27791
29.6667	-2.27913
29.6833	-2.28691
29.7	-2.29424
29.7167	-2.29088
29.7333	-2.30049
29.75	-2.29805
29.7667	-2.28523
29.7833	-2.30598
29.8	-2.31285
29.8167	-2.31239
29.8333	-2.31056
29.85	-2.30812
29.8667	-2.30461
29.8833	-2.29149
29.9	-2.30492
29.9167	-2.29179
29.9333	-2.31499
29.95	-2.30232
29.9667	-2.30751
29.9833	-2.31895
30	-2.31545

## Sheet: MW Results
Administrative Information
File name	ICF_04_12_2024-0007.sample
Analysed by	OBPC
Date of analysis	06 December 2024 14:01:07
Analysis comments
Analysis Module	GPC Analysis
MW Averages
Peaks	Mp (g/mol)	Mn (g/mol)	Mw (g/mol)	Mz (g/mol)	Mz+1 (g/mol)	Mv (g/mol)	PD
Peak 1	168052	34185	235165	706223	1350898	626823	6.87919
Sample Parameters
Injection volume (µL)	200
Concentration options	Undefined
Concentration (mg/mL)	1
dn/dc (mL/g)	0.1
UV extinction coefficient [(mg/mL)-¹][cm-¹]	1
Mark-Houwink K ((10e-5) dL/g)	14.1
Mark-Houwink Alpha	0.7
Concentration Detector Used in Analysis	RI
Baseline regions	Start (mins)	End (mins)
Baseline region 1	6.68333	8.18333
Baseline region 2	24.8	25.7167
Peaks	Start (mins)	End (mins)
Peak 1	10.3667	16.7833
	Trace	Peak Max RT (mins)	Peak Area (mV.s)	Peak Height (mV)
	RI	13	580.511	-4.13909
Flowrate region	Start (mins)	End (mins)
IDD
Reference detector	Undefined
IDD Undefined (secs)	0
Last modified by	OBPC
Last modified date	06 December 2024 14:01:07
Comments
System Calibration
Detector Constants
Entered Parameters For Concentration
Concentration (mg/mL)	0
Injection volume (µL)	0
dn/dc (mL/g)	0
UV extinction coefficient [(mg/mL)-¹][cm-¹]	0
Eluent refractive index	0
Flow rate (mL/min)	0
Comments
Entered Parameters For LS
Mp	0
LS wavelength (nm)	0
Comments
Entered Parameters For Viscometer
Known IV (dL/g)	0
Use Constant Inlet Pressure	No
Comments
System Calibration Information
Created by	OBPC
Creation date	29 October 2024 11:18:00
Last modified by	OBPC
Last modified date	29 October 2024 11:18:00
Information
Sample file used for calibration
Concentration Regions
Baseline regions	Start (mins)	End (mins)
Peaks	Start (mins)	End (mins)
Flowrate region	Start (mins)	End (mins)
LS Regions
Baseline regions	Start (mins)	End (mins)
Peaks	Start (mins)	End (mins)
Flowrate region	Start (mins)	End (mins)
VS Regions
Baseline regions	Start (mins)	End (mins)
Peaks	Start (mins)	End (mins)
Flowrate region	Start (mins)	End (mins)
System Calibration Peak Information
Channel	Peak Max RT (mins)	Peak Height (mV)	Peak Area (mV.s)
Flowrate Information
FRM Name
FRM RT (mins)	0
FRCF	1
Column Calibration
Name	2024-10-29-001
Created By	OBPC
Creation Date	29/10/2024 16:43:21
Last Modified By	OBPC
Last Modified	29/10/2024 16:46:00
High Limit RT (mins)	10.3167
Low Limit RT (mins)	17.05
High Limit MW	6542896
Low Limit MW	585
K (Input) ((10e-5) dL/g)	14.1
Alpha (Input)	0.7
Calibration Flow Marker Name
Calibration Flow Marker RT (mins)	0
Calibration Comments	GPC Column Calibration created 29 October 2024 by OBPC GPC Column Calibration amended 29 October 2024 by OBPC GPC Column Calibration amended 29 October 2024 by OBPC
Calibration Type	GPC Narrow Standard
Curve Fit Type	Polynomial
Order Of Curve Fit	5
Number Of Points	11
Curve Fit Equation	y = - 0.0006266x^5 + 0.04142x^4 - 1.085x^3 + 14.06x^2 - 90.8x + 242.2
Coeff a	242.186
Coeff b	-90.7983
Coeff c	14.0588
Coeff d	-1.08465
Coeff e	0.0414232
Coeff f	-0.000626569
Residual Sum Of Squares	0.000581819
Corrected Sum Of Squares	18.6999
Coefficient Of Determination	0.999969
Standard Y Error Estimate	0.0107872
Linear Correlation Coefficient	-0.999868

## Sheet: Slice Table
Slice Table
RT (mins)	RI	Norm Ht	Cum Ht	Mw (g/mol)	logM	dwdlogM	Outside Calib	Peak
10.3667	0.016741	-2.88477e-05	1	6109137	6.78598	0	No	1
10.3833	0.0310093	-5.34345e-05	1	5971910	6.77611	0	No	1
10.4	0.030324	-5.22535e-05	1	5838166	6.76628	0	No	1
10.4167	0.00675044	-1.16322e-05	1	5707795	6.75647	0	No	1
10.4333	0.00759099	-1.30806e-05	1	5580692	6.74669	0	No	1
10.45	0.0247584	-4.26632e-05	1	5456753	6.73693	0	No	1
10.4667	0.0123238	-2.12362e-05	1	5335880	6.72721	0	No	1
10.4833	0.0017203	-2.96438e-06	1	5217980	6.7175	0	No	1
10.5	0.0069859	-1.20379e-05	1	5102961	6.70782	0	No	1
10.5167	0.00416433	-7.17588e-06	1	4990736	6.69816	0	No	1
10.5333	0.00790405	-1.36201e-05	1	4881221	6.68853	0	No	1
10.55	0.0214094	-3.68922e-05	1	4774335	6.67891	0	No	1
10.5667	0.0202663	-3.49224e-05	1	4670001	6.66932	0	No	1
10.5833	0.00752653	-1.29695e-05	1	4568143	6.65974	0	No	1
10.6	0.0121818	-2.09913e-05	1	4468690	6.65018	0	No	1
10.6167	0.0195836	-3.3746e-05	1	4371571	6.64064	0	No	1
10.6333	-0.0017011	2.93129e-06	0.999997	4276720	6.63111	0.000701212	No	1
10.65	-0.00604854	1.04227e-05	0.999985	4184073	6.6216	0.00172532	No	1
10.6667	-0.01299	2.2384e-05	0.999959	4093567	6.6121	0.00368017	No	1
10.6833	-0.0275608	4.74921e-05	0.999921	4005142	6.60262	0.00433671	No	1
10.7	-0.020159	3.47375e-05	0.999884	3918740	6.59315	0.00364779	No	1
10.7167	-0.0199288	3.43408e-05	0.999844	3834305	6.58369	0.00468063	No	1
10.7333	-0.0314479	5.41902e-05	0.999796	3751785	6.57424	0.00561805	No	1
10.75	-0.0301495	5.1953e-05	0.999749	3671126	6.5648	0.00430014	No	1
10.7667	-0.0169494	2.92068e-05	0.999711	3592279	6.55537	0.00366256	No	1
10.7833	-0.0231279	3.98534e-05	0.999673	3515195	6.54595	0.00455876	No	1
10.8	-0.0267124	4.60301e-05	0.999619	3439827	6.53654	0.00676909	No	1
10.8167	-0.0472341	8.13927e-05	0.999552	3366131	6.52713	0.00758447	No	1
10.8333	-0.0355598	6.12759e-05	0.999487	3294063	6.51773	0.00613447	No	1
10.85	-0.0313624	5.40429e-05	0.999425	3223580	6.50834	0.00701944	No	1
10.8667	-0.0451702	7.78363e-05	0.99935	3154641	6.49895	0.00896901	No	1
10.8833	-0.0525694	9.05864e-05	0.99926	3087208	6.48957	0.0102614	No	1
10.9	-0.0592057	0.000102022	0.999155	3021243	6.48019	0.0121426	No	1
10.9167	-0.0730136	0.000125815	0.99903	2956707	6.47081	0.014641	No	1
10.9333	-0.0863637	0.00014882	0.998884	2893567	6.46143	0.0164948	No	1
10.95	-0.0931526	0.000160518	0.998723	2831786	6.45206	0.0178013	No	1
10.9667	-0.100552	0.000173268	0.99855	2771333	6.44269	0.0190088	No	1
10.9833	-0.106273	0.000183126	0.998363	2712173	6.43332	0.0209586	No	1
11	-0.121759	0.000209812	0.998155	2654277	6.42395	0.0234261	No	1
11.0167	-0.133125	0.000229398	0.997927	2597613	6.41457	0.0252748	No	1
11.0333	-0.141898	0.000244515	0.997686	2542153	6.4052	0.0260982	No	1
11.05	-0.142125	0.000244907	0.997435	2487868	6.39583	0.0275085	No	1
11.0667	-0.157307	0.000271067	0.997172	2434729	6.38645	0.0285662	No	1
11.0833	-0.153719	0.000264886	0.996902	2382711	6.37707	0.0289353	No	1
11.1	-0.161424	0.000278162	0.996623	2331787	6.36769	0.0306611	No	1
11.1167	-0.172638	0.000297485	0.996329	2281933	6.3583	0.031922	No	1
11.1333	-0.175307	0.000302084	0.996023	2233122	6.34891	0.0331522	No	1
11.15	-0.186215	0.000320882	0.995705	2185333	6.33952	0.0347432	No	1
11.1667	-0.192852	0.000332317	0.995369	2138541	6.33012	0.0367362	No	1
11.1833	-0.208185	0.00035874	0.995013	2092725	6.32071	0.0389207	No	1
11.2	-0.216958	0.000373857	0.994644	2047862	6.3113	0.0395092	No	1
11.2167	-0.214897	0.000370305	0.994268	2003932	6.30188	0.0403045	No	1
11.2333	-0.225958	0.000389365	0.993884	1960914	6.29246	0.0412503	No	1
11.25	-0.225575	0.000388706	0.993484	1918787	6.28303	0.0434883	No	1
11.2667	-0.250827	0.000432219	0.993053	1877533	6.27359	0.0478365	No	1
11.2833	-0.273638	0.000471526	0.992591	1837132	6.26414	0.0499367	No	1
11.3	-0.274323	0.000472707	0.992115	1797566	6.25468	0.0508504	No	1
11.3167	-0.284164	0.000489664	0.991617	1758818	6.24522	0.0542869	No	1
11.3333	-0.31262	0.000538699	0.991084	1720869	6.23575	0.0583112	No	1
11.35	-0.329022	0.000566963	0.990527	1683703	6.22627	0.059084	No	1
11.3667	-0.321773	0.000554471	0.989961	1647303	6.21677	0.060227	No	1
11.3833	-0.342294	0.000589834	0.989373	1611653	6.20727	0.0635361	No	1
11.4	-0.359001	0.000618623	0.988753	1576738	6.19776	0.0668637	No	1
11.4167	-0.379828	0.000654511	0.988099	1542542	6.18824	0.0704856	No	1
11.4333	-0.399892	0.000689085	0.987408	1509050	6.1787	0.0744555	No	1
11.45	-0.424687	0.00073181	0.986667	1476247	6.16916	0.0806711	No	1
11.4667	-0.469775	0.000809505	0.985882	1444121	6.1596	0.0837773	No	1
11.4833	-0.460237	0.00079307	0.985068	1412655	6.15004	0.0862973	No	1
11.5	-0.498917	0.000859721	0.984201	1381838	6.14046	0.09476	No	1
11.5167	-0.555602	0.0009574	0.983267	1351656	6.13087	0.100077	No	1
11.5333	-0.559491	0.000964102	0.982294	1322097	6.12126	0.102506	No	1
11.55	-0.584133	0.00100656	0.981285	1293146	6.11165	0.10744	No	1
11.5667	-0.616099	0.00106165	0.980224	1264793	6.10202	0.112892	No	1
11.5833	-0.646692	0.00111436	0.979116	1237025	6.09238	0.116828	No	1
11.6	-0.661873	0.00114052	0.97796	1209831	6.08272	0.122656	No	1
11.6167	-0.713828	0.00123005	0.976732	1183199	6.07306	0.131578	No	1
11.6333	-0.763951	0.00131642	0.975423	1157118	6.06338	0.138777	No	1
11.65	-0.796833	0.00137308	0.974055	1131576	6.05368	0.143475	No	1
11.6667	-0.819033	0.00141134	0.972634	1106564	6.04398	0.149321	No	1
11.6833	-0.865037	0.00149061	0.971145	1082071	6.03426	0.156906	No	1
11.7	-0.907074	0.00156305	0.969582	1058087	6.02452	0.164291	No	1
11.7167	-0.951094	0.0016389	0.967945	1034600	6.01477	0.17156	No	1
11.7333	-0.992062	0.0017095	0.966234	1011603	6.00501	0.178874	No	1
11.75	-1.03685	0.00178667	0.964446	989085	5.99523	0.186957	No	1
11.7667	-1.08682	0.00187278	0.962572	967036	5.98544	0.195753	No	1
11.7833	-1.13999	0.00196441	0.960615	945448	5.97564	0.203504	No	1
11.8	-1.17837	0.00203053	0.95859	924311	5.96582	0.209038	No	1
11.8167	-1.20652	0.00207904	0.956501	903617	5.95598	0.215704	No	1
11.8333	-1.25802	0.00216778	0.954332	883357	5.94614	0.224776	No	1
11.85	-1.31394	0.00226415	0.95207	863523	5.93627	0.23406	No	1
11.8667	-1.36818	0.00235762	0.949713	844105	5.9264	0.243196	No	1
11.8833	-1.42273	0.00245161	0.947267	825097	5.91651	0.251204	No	1
11.9	-1.46431	0.00252326	0.944744	806490	5.9066	0.258219	No	1
11.9167	-1.50772	0.00259807	0.942143	788276	5.89668	0.266088	No	1
11.9333	-1.55937	0.00268707	0.939458	770447	5.88674	0.274529	No	1
11.95	-1.60964	0.0027737	0.936688	752997	5.87679	0.282219	No	1
11.9667	-1.6529	0.00284824	0.933844	735917	5.86683	0.28853	No	1
11.9833	-1.68746	0.00290779	0.930927	719201	5.85685	0.2961	No	1
12	-1.74552	0.00300784	0.927931	702841	5.84686	0.303491	No	1
12.0167	-1.77825	0.00306424	0.924861	686830	5.83685	0.310166	No	1
12.0333	-1.82822	0.00315035	0.921711	671161	5.82683	0.318449	No	1
12.05	-1.87987	0.00323935	0.918475	655829	5.81679	0.326265	No	1
12.0667	-1.92465	0.00331652	0.91516	640825	5.80674	0.333472	No	1
12.0833	-1.96944	0.00339369	0.911758	626145	5.79667	0.342593	No	1
12.1	-2.0368	0.00350977	0.90826	611781	5.7866	0.351468	No	1
12.1167	-2.07899	0.00358247	0.90468	597726	5.7765	0.357915	No	1
12.1333	-2.11813	0.00364991	0.901018	583976	5.76639	0.366725	No	1
12.15	-2.18824	0.00377073	0.897251	570524	5.75627	0.377603	No	1
12.1667	-2.25195	0.0038805	0.893383	557364	5.74614	0.385721	No	1
12.1833	-2.28986	0.00394584	0.889431	544491	5.73599	0.393032	No	1
12.2	-2.34426	0.00403957	0.885383	531898	5.72583	0.403661	No	1
12.2167	-2.42154	0.00417275	0.881225	519580	5.71565	0.413609	No	1
12.2333	-2.46816	0.00425307	0.876964	507532	5.70546	0.422686	No	1
12.25	-2.53537	0.00436889	0.8726	495748	5.69526	0.432851	No	1
12.2667	-2.59511	0.00447183	0.868133	484223	5.68505	0.441607	No	1
12.2833	-2.64584	0.00455925	0.863576	472952	5.67482	0.449589	No	1
12.3	-2.69658	0.00464668	0.858928	461930	5.66458	0.457968	No	1
12.3167	-2.75219	0.00474252	0.854187	451151	5.65432	0.466833	No	1
12.3333	-2.80888	0.00484019	0.849351	440611	5.64406	0.475286	No	1
12.35	-2.85977	0.00492788	0.844429	430305	5.63378	0.482436	No	1
12.3667	-2.90104	0.004999	0.839415	420229	5.62349	0.491977	No	1
12.3833	-2.98061	0.00513612	0.834293	410377	5.61318	0.502192	No	1
12.4	-3.03013	0.00522144	0.829073	400745	5.60287	0.509934	No	1
12.4167	-3.08025	0.00530781	0.823768	391328	5.59254	0.517604	No	1
12.4333	-3.129	0.00539182	0.818384	382123	5.5822	0.523907	No	1
12.45	-3.1628	0.00545006	0.812925	373124	5.57185	0.531018	No	1
12.4667	-3.22131	0.00555089	0.807373	364328	5.56149	0.540786	No	1
12.4833	-3.28715	0.00566435	0.801723	355731	5.55112	0.548771	No	1
12.5	-3.32431	0.00572837	0.795992	347328	5.54074	0.555194	No	1
12.5167	-3.37138	0.00580948	0.790176	339115	5.53035	0.563954	No	1
12.5333	-3.43676	0.00592215	0.784264	331088	5.51994	0.572682	No	1
12.55	-3.48353	0.00600274	0.77827	323244	5.50953	0.578693	No	1
12.5667	-3.51611	0.00605887	0.772207	315579	5.49911	0.584629	No	1
12.5833	-3.56196	0.00613788	0.766073	308088	5.48867	0.591323	No	1
12.6	-3.60369	0.00620979	0.759868	300769	5.47823	0.597124	No	1
12.6167	-3.63871	0.00627013	0.753603	293617	5.46778	0.601797	No	1
12.6333	-3.6667	0.00631838	0.747277	286630	5.45732	0.607668	No	1
12.65	-3.71622	0.0064037	0.740871	279803	5.44685	0.616242	No	1
12.6667	-3.77702	0.00650848	0.734381	273134	5.43638	0.622584	No	1
12.6833	-3.79938	0.00654699	0.72783	266618	5.42589	0.626926	No	1
12.7	-3.83577	0.0066097	0.721231	260253	5.4154	0.630838	No	1
12.7167	-3.85278	0.00663902	0.714587	254036	5.4049	0.634383	No	1
12.7333	-3.88459	0.00669384	0.707886	247963	5.39439	0.641015	No	1
12.75	-3.93914	0.00678784	0.701117	242030	5.38387	0.646317	No	1
12.7667	-3.95463	0.00681452	0.694309	236237	5.37335	0.647582	No	1
12.7833	-3.95974	0.00682333	0.687477	230578	5.36282	0.650222	No	1
12.8	-3.99186	0.00687867	0.680601	225051	5.35228	0.654907	No	1
12.8167	-4.02184	0.00693034	0.673673	219654	5.34174	0.659417	No	1
12.8333	-4.05167	0.00698174	0.666704	214383	5.33119	0.662033	No	1
12.85	-4.0583	0.00699317	0.659715	209236	5.32064	0.66236	No	1
12.8667	-4.05991	0.00699593	0.652715	204210	5.31008	0.663525	No	1
12.8833	-4.07661	0.00702472	0.645697	199303	5.29951	0.665105	No	1
12.9	-4.0831	0.00703589	0.638658	194511	5.28894	0.666787	No	1
12.9167	-4.10087	0.00706652	0.631599	189832	5.27837	0.668374	No	1
12.9333	-4.10598	0.00707533	0.624528	185264	5.26779	0.668674	No	1
12.95	-4.10774	0.00707835	0.617446	180805	5.25721	0.669723	No	1
12.9667	-4.12185	0.00710267	0.610348	176451	5.24662	0.671411	No	1
12.9833	-4.13123	0.00711884	0.603232	172201	5.23604	0.672607	No	1
13	-4.13909	0.00713238	0.596108	168052	5.22544	0.672568	No	1
13.0167	-4.13306	0.00712199	0.588986	164002	5.21485	0.671778	No	1
13.0333	-4.13146	0.00711923	0.581869	160048	5.20425	0.671441	No	1
13.05	-4.13077	0.00711804	0.574754	156189	5.19365	0.671098	No	1
13.0667	-4.12886	0.00711475	0.567644	152423	5.18305	0.670142	No	1
13.0833	-4.12039	0.00710016	0.560547	148746	5.17245	0.668547	No	1
13.1	-4.11039	0.00708293	0.553473	145158	5.16184	0.665596	No	1
13.1167	-4.08499	0.00703915	0.546425	141656	5.15123	0.663581	No	1
13.1333	-4.08628	0.00704138	0.539391	138239	5.14063	0.66275	No	1
13.15	-4.07522	0.00702232	0.532374	134903	5.13002	0.660339	No	1
13.1667	-4.05683	0.00699063	0.52538	131649	5.11942	0.658381	No	1
13.1833	-4.05111	0.00698077	0.518416	128472	5.10881	0.654669	No	1
13.2	-4.0109	0.00691149	0.511492	125373	5.0982	0.650975	No	1
13.2167	-4.00517	0.00690162	0.504601	122348	5.0876	0.648488	No	1
13.2333	-3.97962	0.00685758	0.497743	119397	5.07699	0.644942	No	1
13.25	-3.96062	0.00682484	0.490924	116517	5.06639	0.641313	No	1
13.2667	-3.93384	0.00677869	0.484143	113707	5.05579	0.637962	No	1
13.2833	-3.91804	0.00675148	0.477397	110965	5.04519	0.634937	No	1
13.3	-3.89508	0.0067119	0.47069	108290	5.03459	0.630763	No	1
13.3167	-3.86494	0.00665997	0.464033	105681	5.024	0.625885	No	1
13.3333	-3.83312	0.00660515	0.457426	103134	5.0134	0.621668	No	1
13.35	-3.81092	0.00656689	0.450864	100650	5.00281	0.617602	No	1
13.3667	-3.78078	0.00651496	0.444342	98226	4.99223	0.614706	No	1
13.3833	-3.77277	0.00650115	0.437854	95862	4.98165	0.611539	No	1
13.4	-3.73912	0.00644317	0.431413	93555	4.97107	0.606249	No	1
13.4167	-3.70487	0.00638414	0.425029	91305	4.96049	0.601208	No	1
13.4333	-3.67412	0.00633115	0.418701	89110	4.94993	0.596378	No	1
13.45	-3.6423	0.00627633	0.412416	86968	4.93936	0.593414	No	1
13.4667	-3.63429	0.00626252	0.406163	84879	4.9288	0.590987	No	1
13.4833	-3.60888	0.00621874	0.399943	82842	4.91825	0.587838	No	1
13.5	-3.59187	0.00618942	0.393759	80854	4.9077	0.584689	No	1
13.5167	-3.56631	0.00614538	0.387621	78915	4.89716	0.579857	No	1
13.5333	-3.52854	0.0060803	0.381535	77024	4.88663	0.575458	No	1
13.55	-3.50817	0.0060452	0.375495	75179	4.8761	0.571919	No	1
13.5667	-3.48078	0.005998	0.369503	73379	4.86557	0.567116	No	1
13.5833	-3.44484	0.00593607	0.363566	71624	4.85506	0.561996	No	1
13.6	-3.41349	0.00588204	0.357686	69912	4.84455	0.557309	No	1
13.6167	-3.38274	0.00582905	0.351859	68242	4.83405	0.552567	No	1
13.6333	-3.35062	0.0057737	0.34609	66613	4.82356	0.547331	No	1
13.65	-3.31377	0.0057102	0.340376	65025	4.81308	0.542803	No	1
13.6667	-3.29019	0.00566958	0.334709	63475	4.8026	0.539211	No	1
13.6833	-3.26463	0.00562553	0.329087	61964	4.79214	0.535048	No	1
13.7	-3.23403	0.00557281	0.32352	60489	4.78168	0.52981	No	1
13.7167	-3.19535	0.00550615	0.318014	59052	4.77123	0.524135	No	1
13.7333	-3.15942	0.00544423	0.312569	57649	4.76079	0.519244	No	1
13.75	-3.13019	0.00539388	0.307178	56282	4.75037	0.514583	No	1
13.7667	-3.097	0.00533669	0.301843	54948	4.73995	0.509597	No	1
13.7833	-3.06382	0.00527949	0.296564	53646	4.72954	0.504993	No	1
13.8	-3.0352	0.00523019	0.29134	52377	4.71914	0.499784	No	1
13.8167	-2.99469	0.00516038	0.286183	51140	4.70876	0.493259	No	1
13.8333	-2.95021	0.00508373	0.281092	49932	4.69838	0.488062	No	1
13.85	-2.92572	0.00504153	0.276056	48755	4.68802	0.483829	No	1
13.8667	-2.89283	0.00498486	0.271072	47606	4.67766	0.479128	No	1
13.8833	-2.8627	0.00493293	0.266142	46486	4.66732	0.474363	No	1
13.9	-2.82905	0.00487495	0.26127	45394	4.657	0.468947	No	1
13.9167	-2.79113	0.00480961	0.256469	44328	4.64668	0.461821	No	1
13.9333	-2.73704	0.0047164	0.251747	43289	4.63638	0.454738	No	1
13.95	-2.69973	0.00465211	0.247093	42275	4.62608	0.449781	No	1
13.9667	-2.67112	0.0046028	0.242491	41286	4.6158	0.445627	No	1
13.9833	-2.64342	0.00455508	0.237939	40322	4.60554	0.441253	No	1
14	-2.61221	0.00450131	0.233437	39381	4.59529	0.437004	No	1
14.0167	-2.58604	0.00445621	0.228992	38464	4.58505	0.431327	No	1
14.0333	-2.5379	0.00437325	0.224616	37569	4.57483	0.42446	No	1
14.05	-2.49769	0.00430397	0.220312	36696	4.56462	0.418586	No	1
14.0667	-2.46145	0.00424152	0.216065	35844	4.55442	0.414484	No	1
14.0833	-2.4423	0.00420852	0.211869	35013	4.54423	0.40955	No	1
14.1	-2.39629	0.00412924	0.207743	34203	4.53406	0.401906	No	1
14.1167	-2.34525	0.00404128	0.203689	33413	4.52392	0.396643	No	1
14.1333	-2.32748	0.00401065	0.199691	32642	4.51378	0.392045	No	1
14.15	-2.28437	0.00393637	0.195753	31889	4.50364	0.385804	No	1
14.1667	-2.24736	0.0038726	0.191873	31156	4.49354	0.381696	No	1
14.1833	-2.22943	0.00384171	0.188034	30440	4.48344	0.379001	No	1
14.2	-2.20906	0.0038066	0.184237	29742	4.47337	0.374372	No	1
14.2167	-2.16855	0.00373679	0.180491	29060	4.4633	0.370047	No	1
14.2333	-2.15184	0.003708	0.17679	28396	4.45326	0.366669	No	1
14.25	-2.12246	0.00365738	0.17314	27747	4.44322	0.36103	No	1
14.2667	-2.07951	0.00358336	0.169558	27115	4.43321	0.354078	No	1
14.2833	-2.03503	0.00350671	0.166047	26497	4.4232	0.348133	No	1
14.3	-2.00398	0.0034532	0.162595	25895	4.41322	0.343253	No	1
14.3167	-1.97201	0.00339812	0.1592	25307	4.40324	0.337964	No	1
14.3333	-1.93638	0.00333672	0.155865	24734	4.39329	0.332212	No	1
14.35	-1.89922	0.00327269	0.152588	24175	4.38337	0.327292	No	1
14.3667	-1.87336	0.00322812	0.149368	23629	4.37345	0.321972	No	1
14.3833	-1.83177	0.00315647	0.146211	23096	4.36354	0.315642	No	1
14.4	-1.79446	0.00309218	0.143115	22576	4.35365	0.310543	No	1
14.4167	-1.76723	0.00304524	0.140068	22069	4.34378	0.306921	No	1
14.4333	-1.74701	0.0030104	0.137057	21574	4.33393	0.304103	No	1
14.45	-1.72908	0.0029795	0.134093	21091	4.3241	0.298655	No	1
14.4667	-1.67895	0.00289313	0.131189	20619	4.31427	0.292628	No	1
14.4833	-1.65461	0.00285119	0.12835	20159	4.30447	0.286514	No	1
14.5	-1.60372	0.0027635	0.125577	19710	4.29469	0.280326	No	1
14.5167	-1.57877	0.0027205	0.122856	19271	4.2849	0.27654	No	1
14.5333	-1.55535	0.00268014	0.120186	18843	4.27515	0.271096	No	1
14.55	-1.51178	0.00260507	0.117575	18425	4.26541	0.265201	No	1
14.5667	-1.48348	0.00255629	0.115022	18018	4.25571	0.260138	No	1
14.5833	-1.44953	0.00249779	0.11252	17620	4.24601	0.255586	No	1
14.6	-1.42717	0.00245926	0.110063	17231	4.23631	0.25171	No	1
14.6167	-1.401	0.00241417	0.107659	16852	4.22665	0.245629	No	1
14.6333	-1.35408	0.00233331	0.105313	16481	4.21698	0.24044	No	1
14.65	-1.33813	0.00230584	0.103008	16120	4.20737	0.237988	No	1
14.6667	-1.32203	0.00227809	0.100732	15766	4.19772	0.235213	No	1
14.6833	-1.30257	0.00224457	0.0984923	15422	4.18814	0.231234	No	1
14.7	-1.2732	0.00219395	0.0962948	15085	4.17855	0.22724	No	1
14.7167	-1.25374	0.00216042	0.094134	14756	4.16897	0.224358	No	1
14.7333	-1.23688	0.00213137	0.0920149	14435	4.15942	0.21926	No	1
14.75	-1.19301	0.00205577	0.0899453	14122	4.1499	0.21475	No	1
14.7667	-1.18286	0.00203828	0.0879104	13815	4.14035	0.212709	No	1
14.7833	-1.16646	0.00201001	0.0859036	13516	4.13085	0.209537	No	1
14.8	-1.14395	0.00197123	0.0839356	13224	4.12136	0.205257	No	1
14.8167	-1.11549	0.00192219	0.0820074	12939	4.1119	0.201821	No	1
14.8333	-1.10244	0.00189971	0.0801088	12660	4.10243	0.199677	No	1
14.85	-1.08833	0.00187538	0.0782369	12388	4.093	0.196813	No	1
14.8667	-1.0675	0.00183949	0.0763981	12122	4.08357	0.193308	No	1
14.8833	-1.04652	0.00180333	0.0745949	11862	4.07416	0.189873	No	1
14.9	-1.0266	0.00176902	0.0728235	11608	4.06476	0.187136	No	1
14.9167	-1.0134	0.00174627	0.0710798	11360	4.05538	0.184569	No	1
14.9333	-0.995472	0.00171537	0.0693684	11118	4.04603	0.180825	No	1
14.95	-0.969607	0.0016708	0.0677059	10881	4.03667	0.174675	No	1
14.9667	-0.925737	0.00159521	0.0660925	10649	4.02731	0.170854	No	1
14.9833	-0.925354	0.00159455	0.0645048	10423	4.01799	0.169668	No	1
15	-0.91017	0.00156838	0.0629384	10202	4.00869	0.166794	No	1
15.0167	-0.891629	0.00153643	0.0614106	9986	3.99939	0.161856	No	1
15.0333	-0.85432	0.00147214	0.0599242	9775	3.99012	0.158331	No	1
15.05	-0.851191	0.00146675	0.0584547	9568	3.98082	0.158649	No	1
15.0667	-0.855386	0.00147398	0.056993	9366	3.97155	0.157102	No	1
15.0833	-0.832268	0.00143414	0.0555577	9169	3.96232	0.153356	No	1
15.1	-0.812964	0.00140088	0.0541471	8976	3.95308	0.152144	No	1
15.1167	-0.817159	0.00140811	0.0527506	8788	3.94389	0.15071	No	1
15.1333	-0.795566	0.0013709	0.0513848	8603	3.93465	0.145826	No	1
15.15	-0.762987	0.00131476	0.0500622	8423	3.92547	0.141697	No	1
15.1667	-0.749635	0.00129175	0.048779	8246	3.91624	0.137582	No	1
15.1833	-0.717361	0.00123614	0.0475434	8074	3.90709	0.131661	No	1
15.2	-0.684935	0.00118026	0.0463452	7905	3.8979	0.129709	No	1
15.2167	-0.695081	0.00119775	0.0451603	7740	3.88874	0.12901	No	1
15.2333	-0.676082	0.00116501	0.0439943	7579	3.87961	0.125876	No	1
15.25	-0.66044	0.00113806	0.0428557	7421	3.87046	0.123234	No	1
15.2667	-0.646782	0.00111452	0.0417434	7267	3.86136	0.120365	No	1
15.2833	-0.628852	0.00108362	0.0406556	7116	3.85224	0.118077	No	1
15.3	-0.62145	0.00107087	0.0395922	6968	3.84311	0.115201	No	1
15.3167	-0.597416	0.00102945	0.0385537	6823	3.83398	0.112807	No	1
15.3333	-0.595203	0.00102564	0.0375341	6682	3.82491	0.111226	No	1
15.35	-0.579866	0.000999212	0.0365368	6543	3.81578	0.108033	No	1
15.3667	-0.560715	0.000966211	0.0355615	6408	3.80672	0.106551	No	1
15.3833	-0.563537	0.000971073	0.0345975	6275	3.79761	0.105655	No	1
15.4	-0.550642	0.000948853	0.0336537	6145	3.78852	0.102204	No	1
15.4167	-0.526608	0.000907438	0.032748	6018	3.77945	0.0973678	No	1
15.4333	-0.499217	0.000860239	0.0318802	5894	3.77041	0.0939273	No	1
15.45	-0.489984	0.000844329	0.031033	5772	3.76133	0.0928991	No	1
15.4667	-0.488075	0.00084104	0.0302002	5653	3.75228	0.0908062	No	1
15.4833	-0.467704	0.000805936	0.0293945	5536	3.7432	0.0869521	No	1
15.5	-0.447332	0.000770831	0.0286222	5422	3.73416	0.0834681	No	1
15.5167	-0.430927	0.000742564	0.027863	5310	3.72509	0.0840966	No	1
15.5333	-0.45389	0.000782133	0.027108	5200	3.716	0.0825151	No	1
15.55	-0.414292	0.000713899	0.0263844	5093	3.70697	0.0771721	No	1
15.5667	-0.397735	0.000685368	0.0256918	4987	3.69784	0.0756671	No	1
15.5833	-0.398573	0.000686812	0.0250034	4884	3.68878	0.0762011	No	1
15.6	-0.403531	0.000695355	0.024314	4783	3.6797	0.0758597	No	1
15.6167	-0.395214	0.000681023	0.0236367	4685	3.67071	0.0734846	No	1
15.6333	-0.378809	0.000652755	0.0229813	4588	3.66162	0.0709611	No	1
15.65	-0.368966	0.000635793	0.0223478	4493	3.65254	0.0685936	No	1
15.6667	-0.35424	0.000610418	0.0217314	4400	3.64345	0.0671345	No	1
15.6833	-0.35401	0.000610021	0.0211252	4309	3.63438	0.0662355	No	1
15.7	-0.345235	0.0005949	0.0205255	4219	3.62521	0.0656212	No	1
15.7167	-0.348056	0.000599762	0.0199346	4132	3.61616	0.0642087	No	1
15.7333	-0.330889	0.00057018	0.0193613	4046	3.60703	0.0616254	No	1
15.75	-0.321351	0.000553744	0.0188125	3962	3.59791	0.0587249	No	1
15.7667	-0.300826	0.000518377	0.0182783	3880	3.58883	0.058271	No	1
15.7833	-0.317228	0.00054664	0.0177354	3799	3.57967	0.0605142	No	1
15.8	-0.32539	0.000560705	0.0171806	3719	3.57043	0.0607373	No	1
15.8167	-0.32043	0.000552157	0.0166302	3642	3.56134	0.0593777	No	1
15.8333	-0.311807	0.000537299	0.0160972	3566	3.55218	0.0567571	No	1
15.85	-0.293419	0.000505613	0.0155783	3491	3.54295	0.0561535	No	1
15.8667	-0.306312	0.000527829	0.0150558	3418	3.53377	0.0573435	No	1
15.8833	-0.307149	0.000529273	0.014534	3346	3.52453	0.0558327	No	1
15.9	-0.291203	0.000501794	0.014031	3276	3.51534	0.0530569	No	1
15.9167	-0.27846	0.000479836	0.0135496	3206	3.50596	0.0509529	No	1
15.9333	-0.269685	0.000464715	0.0130875	3139	3.49679	0.0486822	No	1
15.95	-0.255112	0.000439603	0.0126428	3072	3.48742	0.0470091	No	1
15.9667	-0.252745	0.000435525	0.012204	3007	3.47813	0.0471844	No	1
15.9833	-0.258161	0.000444857	0.0117687	2943	3.46879	0.0460745	No	1
16	-0.241909	0.000416852	0.0113481	2880	3.45939	0.0438009	No	1
16.0167	-0.23466	0.00040436	0.010946	2819	3.4501	0.0418976	No	1
16.0333	-0.222375	0.000383191	0.0105532	2758	3.44059	0.0416038	No	1
16.05	-0.232673	0.000400937	0.010155	2699	3.4312	0.0428094	No	1
16.0667	-0.236868	0.000408166	0.00975502	2641	3.42177	0.041756	No	1
16.0833	-0.222447	0.000383316	0.00936756	2584	3.41229	0.0399156	No	1
16.1	-0.217945	0.000375557	0.00899436	2528	3.40278	0.0385091	No	1
16.1167	-0.208254	0.000358859	0.00863916	2473	3.39322	0.0358976	No	1
16.1333	-0.190324	0.000327961	0.00829941	2419	3.38364	0.0350383	No	1
16.15	-0.200012	0.000344656	0.0079596	2366	3.37401	0.0356683	No	1
16.1667	-0.198713	0.000342418	0.00761585	2314	3.36436	0.0356095	No	1
16.1833	-0.200772	0.000345966	0.00727407	2263	3.35468	0.0350046	No	1
16.2	-0.19337	0.000333211	0.00694799	2213	3.34498	0.0321182	No	1
16.2167	-0.169642	0.000292322	0.00664374	2164	3.33526	0.0302718	No	1
16.2333	-0.173836	0.000299551	0.00634954	2116	3.32552	0.0298156	No	1
16.25	-0.165824	0.000285744	0.00606455	2068	3.31555	0.0281588	No	1
16.2667	-0.156286	0.000269309	0.00579658	2022	3.30578	0.0261268	No	1
16.2833	-0.143849	0.000247877	0.00554365	1976	3.29579	0.0248891	No	1
16.3	-0.143314	0.000246954	0.00529619	1931	3.28578	0.0248043	No	1
16.3167	-0.144151	0.000248398	0.00504964	1887	3.27577	0.0244811	No	1
16.3333	-0.140869	0.000242743	0.00480547	1844	3.26576	0.0241053	No	1
16.35	-0.141097	0.000243135	0.00456464	1802	3.25575	0.023587	No	1
16.3667	-0.136137	0.000234587	0.00433421	1760	3.24551	0.0218303	No	1
16.3833	-0.121716	0.000209738	0.00412362	1719	3.23528	0.019471	No	1
16.4	-0.109431	0.000188569	0.00392243	1679	3.22505	0.0197799	No	1
16.4167	-0.126596	0.000218147	0.00371007	1640	3.21484	0.0214312	No	1
16.4333	-0.130486	0.00022485	0.003496	1601	3.20439	0.0198989	No	1
16.45	-0.109503	0.000188694	0.00330073	1563	3.19396	0.0176002	No	1
16.4667	-0.103933	0.000179094	0.00312051	1526	3.18355	0.0168134	No	1
16.4833	-0.101109	0.000174228	0.00294568	1489	3.17289	0.0163813	No	1
16.5	-0.0998102	0.000171991	0.00277348	1453	3.16227	0.0161249	No	1
16.5167	-0.0991222	0.000170805	0.00260339	1418	3.15168	0.0157954	No	1
16.5333	-0.0969084	0.00016699	0.00243383	1384	3.14114	0.0158341	No	1
16.55	-0.100798	0.000173693	0.00225697	1350	3.13033	0.016951	No	1
16.5667	-0.112165	0.000193279	0.00207059	1316	3.11926	0.0173876	No	1
16.5833	-0.107662	0.00018552	0.00187902	1284	3.10857	0.0176842	No	1
16.6	-0.11735	0.000202215	0.00168731	1252	3.0976	0.017188	No	1
16.6167	-0.102776	0.000177102	0.00150153	1220	3.08636	0.0163879	No	1
16.6333	-0.108497	0.00018696	0.00131877	1189	3.07518	0.0164189	No	1
16.65	-0.104605	0.000180253	0.00113365	1159	3.06408	0.0165871	No	1
16.6667	-0.112157	0.000193266	0.000950827	1129	3.05269	0.015788	No	1
16.6833	-0.0955996	0.000164735	0.000780494	1100	3.04139	0.0141685	No	1
16.7	-0.092165	0.000158817	0.000623897	1071	3.02979	0.0131755	No	1
16.7167	-0.0836951	0.000144221	0.000481759	1043	3.01828	0.0114684	No	1
16.7333	-0.0704949	0.000121475	0.000351058	1016	3.00689	0.0110235	No	1
16.75	-0.0788096	0.000135803	0.000216613	989	2.9952	0.0119365	No	1
16.7667	-0.0840726	0.000144872	7.32334e-05	962	2.98318	0.0123679	No	1
