# Supplementary material for: Descriptive study and evaluation of shrink hoods with recycled content for regulatory compliance
Source: Research Square preprint supplement (doi:10.21203/rs.3.rs-6261320/v1), 2025-06-25
Supplement: Supplementary file 2 [file 8ff096db2d03edc392290cfb.xlsx]

## Sheet: Sample Details
Administrative Information
Export date	10 December 2024 09:43:04
Culture name	en-GB
Decimal separator	.
Workspace name	November 2024
Workspace path	C:\ProgramData\Agilent Technologies\GPC\Workspaces\2024\November 2024\
File name	ICF_04_12_2024-0009.sample
Creation date	09 December 2024 11:34:04
Created by	OBPC
Comments	Collected by Agilent GPC/SEC Software Version 2.1.9.34851
Software version	Agilent SEC Software - 2.1.9.34851
Sample Information
Sample name	F bis
Information
Sample type	Sample
Injection date	09 December 2024
Vial number	None
Injection number	1
Injection volume (µL)	200
Concentration (mg/mL)	1
dn/dc (mL/g)	0.1
UV extinction coefficient [(mg/mL)-¹][cm-¹]	1
Mp (g/mol)	100000
IV (dL/g)	0.5
Mark-Houwink K ((10e-5) dL/g)	14.1
Mark-Houwink Alpha	0.7
Analysed	Yes
Sample Instrument Conditions
Eluent
Eluent refractive index	1
Set flow rate (mL/min)	1
LS wavelength (nm)	650
Laser power (%)	0
Set detector temperature (°C)	0
Actual detector temperature (°C)	0
Actual flow rate (mL/min)	0
Column information
Data origin	Collected by Agilent GPC/SEC Software Version 2.1.9.34851
Instrument name	Agilent DataStream
Sample Collection Parameters
Collected by	OBPC
Number of channels	1
Run length (mins)	30.0167
Delay time (secs)	0
Sampling interval (secs)	1
Number of data points	1801
Sample DLS Parameters
Eluent refractive index	1
Eluent viscosity (P)	0.0089
DLS correlator run time (secs)	5
DLS Clip Time (µs)	100
DLS R²	0.4
Sample Channel Information
Channel ID	Detector type	Detector name	Detector units	Channel Information
1	RI	Trace0	mV

## Sheet: Raw Data
Sample Collection Parameters
Collected by	OBPC
Number of channels	1
Run length (mins)	30.0167
Delay time (secs)	0
Sampling interval (secs)	1
Number of data points	1801
Sample DLS Parameters
Eluent refractive index	1
Eluent viscosity (P)	0.0089
DLS correlator run time (secs)	5
DLS Clip Time (µs)	100
DLS R²	0.4
Sample Channel Information
Channel ID	Detector type	Detector name	Detector units	Channel Information
1	RI	Trace0	mV
Raw Data
RT (mins)	Response Trace 1
0	-2.02908
0.0166667	-2.03697
0.0333333	-2.04384
0.05	-2.03789
0.0666667	-2.03102
0.0833333	-2.03896
0.1	-2.03133
0.116667	-2.01012
0.133333	-2.01088
0.15	-2.01897
0.166667	-2.00279
0.183333	-2.00172
0.2	-2.00432
0.216667	-2.00218
0.233333	-1.98555
0.25	-1.99089
0.266667	-1.98845
0.283333	-1.99776
0.3	-1.99348
0.316667	-2.00539
0.333333	-2.0089
0.35	-2.01408
0.366667	-2.00218
0.383333	-2.01195
0.4	-2.01347
0.416667	-1.99989
0.433333	-2.00523
0.45	-2.00417
0.466667	-2.00371
0.483333	-1.99181
0.5	-1.99257
0.516667	-1.98479
0.533333	-1.99196
0.55	-2.0002
0.566667	-1.97945
0.583333	-1.97868
0.6	-1.98341
0.616667	-1.96602
0.633333	-1.98677
0.65	-2.00188
0.666667	-2.01912
0.683333	-2.03209
0.7	-2.0446
0.716667	-2.04002
0.733333	-2.05879
0.75	-2.04811
0.766667	-2.0356
0.783333	-2.04781
0.8	-2.0475
0.816667	-2.033
0.833333	-2.03987
0.85	-2.03133
0.866667	-2.01912
0.883333	-2.02278
0.9	-2.015
0.916667	-2.01408
0.933333	-2.02568
0.95	-2.03117
0.966667	-2.04231
0.983333	-2.03209
1	-2.0443
1.01667	-2.03606
1.03333	-2.03056
1.05	-2.03117
1.06667	-2.03041
1.08333	-2.0298
1.1	-2.01912
1.11667	-2.033
1.13333	-2.02232
1.15	-2.03285
1.16667	-2.03194
1.18333	-2.04018
1.2	-2.04109
1.21667	-2.02782
1.23333	-2.03072
1.25	-2.00554
1.26667	-2.0005
1.28333	-2.0031
1.3	-2.01134
1.31667	-2.02614
1.33333	-2.02324
1.35	-2.02583
1.36667	-2.02705
1.38333	-2.04063
1.4	-2.02919
1.41667	-2.01576
1.43333	-2.01927
1.45	-2.0063
1.46667	-1.99364
1.48333	-1.9854
1.5	-2.00844
1.51667	-2.00569
1.53333	-2.00722
1.55	-2.00905
1.56667	-2.00615
1.58333	-1.9915
1.6	-1.99913
1.61667	-1.9883
1.63333	-1.98296
1.65	-1.97319
1.66667	-1.98311
1.68333	-1.96938
1.7	-1.96861
1.71667	-1.98357
1.73333	-1.9709
1.75	-1.96266
1.76667	-1.97578
1.78333	-1.9738
1.8	-1.96907
1.81667	-1.9622
1.83333	-1.9622
1.85	-1.97502
1.86667	-1.97334
1.88333	-1.98387
1.9	-1.97395
1.91667	-1.96465
1.93333	-1.9619
1.95	-1.97868
1.96667	-1.97121
1.98333	-1.99196
2	-1.97868
2.01667	-1.96999
2.03333	-1.97899
2.05	-1.98723
2.06667	-1.98357
2.08333	-1.9709
2.1	-1.97517
2.11667	-1.97609
2.13333	-1.98158
2.15	-1.97243
2.16667	-1.96404
2.18333	-1.98448
2.2	-1.98036
2.21667	-1.97487
2.23333	-1.96587
2.25	-1.96022
2.26667	-1.95381
2.28333	-1.95976
2.3	-1.94359
2.31667	-1.94679
2.33333	-1.93596
2.35	-1.92848
2.36667	-1.92802
2.38333	-1.94099
2.4	-1.93565
2.41667	-1.9294
2.43333	-1.92558
2.45	-1.91689
2.46667	-1.9352
2.48333	-1.94878
2.5	-1.94649
2.51667	-1.93504
2.53333	-1.92894
2.55	-1.92833
2.56667	-1.9323
2.58333	-1.95107
2.6	-1.93703
2.61667	-1.92543
2.63333	-1.92543
2.65	-1.94069
2.66667	-1.93901
2.68333	-1.94756
2.7	-1.93977
2.71667	-1.95473
2.73333	-1.95839
2.75	-1.95824
2.76667	-1.94771
2.78333	-1.95457
2.8	-1.97105
2.81667	-1.97289
2.83333	-1.96175
2.85	-1.94923
2.86667	-1.95641
2.88333	-1.96007
2.9	-1.95656
2.91667	-1.96648
2.93333	-1.95808
2.95	-1.97151
2.96667	-1.97441
2.98333	-1.96754
3	-1.96022
3.01667	-1.95381
3.03333	-1.98387
3.05	-1.96495
3.06667	-1.9532
3.08333	-1.97289
3.1	-1.98158
3.11667	-1.98357
3.13333	-1.97136
3.15	-1.98143
3.16667	-1.99806
3.18333	-1.98967
3.2	-1.9648
3.21667	-1.97868
3.23333	-1.97395
3.25	-1.9651
3.26667	-1.95717
3.28333	-1.95976
3.3	-1.95229
3.31667	-1.95015
3.33333	-1.95839
3.35	-1.96907
3.36667	-1.98494
3.38333	-1.97212
3.4	-1.96861
3.41667	-1.97853
3.43333	-1.96312
3.45	-1.96571
3.46667	-1.9529
3.48333	-1.9384
3.5	-1.96495
3.51667	-1.95976
3.53333	-1.95198
3.55	-1.94496
3.56667	-1.93703
3.58333	-1.94893
3.6	-1.94679
3.61667	-1.95335
3.63333	-1.95778
3.65	-1.96358
3.66667	-1.96053
3.68333	-1.96342
3.7	-1.94237
3.71667	-1.94222
3.73333	-1.9384
3.75	-1.92223
3.76667	-1.91704
3.78333	-1.94084
3.8	-1.94527
3.81667	-1.9445
3.83333	-1.94084
3.85	-1.91902
3.86667	-1.92787
3.88333	-1.95137
3.9	-1.95244
3.91667	-1.94984
3.93333	-1.95534
3.95	-1.96358
3.96667	-1.96358
3.98333	-1.96175
4	-1.94405
4.01667	-1.96281
4.03333	-1.9593
4.05	-1.96297
4.06667	-1.95061
4.08333	-1.94038
4.1	-1.93352
4.11667	-1.95534
4.13333	-1.95366
4.15	-1.95854
4.16667	-1.95671
4.18333	-1.95015
4.2	-1.95274
4.21667	-1.95534
4.23333	-1.95305
4.25	-1.94695
4.26667	-1.94145
4.28333	-1.94267
4.3	-1.93153
4.31667	-1.9352
4.33333	-1.94145
4.35	-1.9413
4.36667	-1.959
4.38333	-1.95
4.4	-1.95503
4.41667	-1.96342
4.43333	-1.96083
4.45	-1.95961
4.46667	-1.95625
4.48333	-1.95442
4.5	-1.96434
4.51667	-1.96007
4.53333	-1.96114
4.55	-1.96114
4.56667	-1.95854
4.58333	-1.97441
4.6	-1.95473
4.61667	-1.95473
4.63333	-1.94542
4.65	-1.95915
4.66667	-1.97426
4.68333	-1.95183
4.7	-1.9622
4.71667	-1.96404
4.73333	-1.95244
4.75	-1.95702
4.76667	-1.95992
4.78333	-1.96968
4.8	-1.95488
4.81667	-1.95335
4.83333	-1.95351
4.85	-1.9558
4.86667	-1.96114
4.88333	-1.95244
4.9	-1.95625
4.91667	-1.96037
4.93333	-1.95808
4.95	-1.95137
4.96667	-1.93657
4.98333	-1.94618
5	-1.96938
5.01667	-1.96663
5.03333	-1.96129
5.05	-1.97166
5.06667	-1.96938
5.08333	-1.98692
5.1	-1.97319
5.11667	-1.98128
5.13333	-1.98341
5.15	-1.99791
5.16667	-2.00661
5.18333	-1.98555
5.2	-1.98509
5.21667	-1.99013
5.23333	-1.97533
5.25	-1.96556
5.26667	-1.97014
5.28333	-1.98021
5.3	-1.97441
5.31667	-1.98524
5.33333	-1.96785
5.35	-1.96358
5.36667	-1.97289
5.38333	-1.97075
5.4	-1.97762
5.41667	-1.98387
5.43333	-1.96373
5.45	-1.96953
5.46667	-1.97685
5.48333	-1.96877
5.5	-1.96587
5.51667	-1.95519
5.53333	-1.95061
5.55	-1.96205
5.56667	-1.95045
5.58333	-1.93825
5.6	-1.92848
5.61667	-1.94862
5.63333	-1.95335
5.65	-1.9413
5.66667	-1.95564
5.68333	-1.94649
5.7	-1.95519
5.71667	-1.9651
5.73333	-1.96388
5.75	-1.9561
5.76667	-1.95305
5.78333	-1.94115
5.8	-1.92558
5.81667	-1.9297
5.83333	-1.93428
5.85	-1.93962
5.86667	-1.94222
5.88333	-1.9294
5.9	-1.93489
5.91667	-1.94817
5.93333	-1.96571
5.95	-1.95595
5.96667	-1.95717
5.98333	-1.96816
6	-1.95442
6.01667	-1.96266
6.03333	-1.968
6.05	-1.95152
6.06667	-1.94923
6.08333	-1.95839
6.1	-1.95229
6.11667	-1.95427
6.13333	-1.95503
6.15	-1.95808
6.16667	-1.95717
6.18333	-1.96693
6.2	-1.9593
6.21667	-1.96114
6.23333	-1.96617
6.25	-1.95915
6.26667	-1.96251
6.28333	-1.97289
6.3	-1.9648
6.31667	-1.95869
6.33333	-1.96785
6.35	-1.95869
6.36667	-1.95641
6.38333	-1.96236
6.4	-1.93977
6.41667	-1.96312
6.43333	-1.96312
6.45	-1.98174
6.46667	-1.9709
6.48333	-1.968
6.5	-1.96205
6.51667	-1.96617
6.53333	-1.96083
6.55	-1.94984
6.56667	-1.98174
6.58333	-1.97975
6.6	-1.98204
6.61667	-1.9825
6.63333	-1.98143
6.65	-1.98051
6.66667	-1.97563
6.68333	-1.98723
6.7	-1.99272
6.71667	-1.99104
6.73333	-1.9883
6.75	-1.97762
6.76667	-1.99577
6.78333	-1.98631
6.8	-1.98158
6.81667	-1.98845
6.83333	-1.98448
6.85	-1.96785
6.86667	-1.95091
6.88333	-1.97975
6.9	-1.97945
6.91667	-1.98524
6.93333	-1.97533
6.95	-1.9828
6.96667	-1.97578
6.98333	-1.97823
7	-1.98494
7.01667	-1.99333
7.03333	-1.9912
7.05	-1.99089
7.06667	-2.0153
7.08333	-2.00447
7.1	-1.99715
7.11667	-1.98097
7.13333	-1.99379
7.15	-2.00203
7.16667	-1.99547
7.18333	-2.00584
7.2	-2.00356
7.21667	-1.99806
7.23333	-1.99013
7.25	-1.99089
7.26667	-1.99974
7.28333	-2.00462
7.3	-2.01057
7.31667	-2.00356
7.33333	-2.0063
7.35	-1.99623
7.36667	-2.00295
7.38333	-2.0031
7.4	-2.00142
7.41667	-2.00829
7.43333	-2.01057
7.45	-1.99989
7.46667	-2.00722
7.48333	-2.0118
7.5	-2.01775
7.51667	-2.01256
7.53333	-2.02599
7.55	-2.03545
7.56667	-2.006
7.58333	-2.02873
7.6	-2.01668
7.61667	-2.00035
7.63333	-2.00706
7.65	-2.01851
7.66667	-2.03606
7.68333	-2.02171
7.7	-2.00462
7.71667	-2.00905
7.73333	-2.02766
7.75	-2.02019
7.76667	-2.01347
7.78333	-2.01592
7.8	-2.01317
7.81667	-2.01256
7.83333	-2.0182
7.85	-2.0118
7.86667	-2.01881
7.88333	-2.01988
7.9	-2.02019
7.91667	-1.99593
7.93333	-2.00035
7.95	-2.01866
7.96667	-2.0179
7.98333	-2.00462
8	-1.98967
8.01667	-1.99837
8.03333	-2.00432
8.05	-2.01805
8.06667	-2.01454
8.08333	-2.00142
8.1	-1.99989
8.11667	-2.01424
8.13333	-2.00691
8.15	-2.0182
8.16667	-2.0388
8.18333	-2.04094
8.2	-2.0327
8.21667	-2.03026
8.23333	-2.01225
8.25	-2.00981
8.26667	-2.01912
8.28333	-2.0208
8.3	-2.01683
8.31667	-2.01958
8.33333	-2.01103
8.35	-2.00554
8.36667	-1.99852
8.38333	-2.00508
8.4	-2.02324
8.41667	-2.03148
8.43333	-2.04048
8.45	-2.01393
8.46667	-2.02843
8.48333	-2.02278
8.5	-2.02736
8.51667	-2.01698
8.53333	-2.03636
8.55	-2.0208
8.56667	-2.03011
8.58333	-2.04979
8.6	-2.04643
8.61667	-2.04338
8.63333	-2.03697
8.65	-2.03957
8.66667	-2.03789
8.68333	-2.03606
8.7	-2.04338
8.71667	-2.04979
8.73333	-2.06825
8.75	-2.05223
8.76667	-2.05223
8.78333	-2.06383
8.8	-2.03819
8.81667	-2.03362
8.83333	-2.04735
8.85	-2.02782
8.86667	-2.06047
8.88333	-2.06413
8.9	-2.04948
8.91667	-2.06215
8.93333	-2.07268
8.95	-2.07039
8.96667	-2.06383
8.98333	-2.06505
9	-2.0652
9.01667	-2.06047
9.03333	-2.04674
9.05	-2.05376
9.06667	-2.05269
9.08333	-2.06306
9.1	-2.06017
9.11667	-2.06902
9.13333	-2.07146
9.15	-2.06123
9.16667	-2.05757
9.18333	-2.07603
9.2	-2.07649
9.21667	-2.05147
9.23333	-2.0472
9.25	-2.05894
9.26667	-2.05528
9.28333	-2.04308
9.3	-2.06322
9.31667	-2.06505
9.33333	-2.05559
9.35	-2.05772
9.36667	-2.06596
9.38333	-2.05269
9.4	-2.05559
9.41667	-2.04369
9.43333	-2.0536
9.45	-2.07832
9.46667	-2.08626
9.48333	-2.08534
9.5	-2.09129
9.51667	-2.07558
9.53333	-2.07573
9.55	-2.07924
9.56667	-2.09938
9.58333	-2.09221
9.6	-2.09755
9.61667	-2.09129
9.63333	-2.08824
9.65	-2.07939
9.66667	-2.09572
9.68333	-2.08534
9.7	-2.09251
9.71667	-2.09282
9.73333	-2.09465
9.75	-2.09282
9.76667	-2.0919
9.78333	-2.08305
9.8	-2.09053
9.81667	-2.09663
9.83333	-2.09312
9.85	-2.10426
9.86667	-2.10854
9.88333	-2.08794
9.9	-2.08138
9.91667	-2.08519
9.93333	-2.07573
9.95	-2.07817
9.96667	-2.08138
9.98333	-2.09068
10	-2.09877
10.0167	-2.10548
10.0333	-2.10121
10.05	-2.10808
10.0667	-2.12242
10.0833	-2.10777
10.1	-2.12059
10.1167	-2.11403
10.1333	-2.10381
10.15	-2.09587
10.1667	-2.10487
10.1833	-2.10808
10.2	-2.12791
10.2167	-2.11067
10.2333	-2.11006
10.25	-2.11983
10.2667	-2.13585
10.2833	-2.14333
10.3	-2.1331
10.3167	-2.12593
10.3333	-2.14027
10.35	-2.15553
10.3667	-2.16393
10.3833	-2.15431
10.4	-2.14302
10.4167	-2.14897
10.4333	-2.15141
10.45	-2.16316
10.4667	-2.1624
10.4833	-2.16469
10.5	-2.16393
10.5167	-2.16393
10.5333	-2.17262
10.55	-2.16393
10.5667	-2.17247
10.5833	-2.17415
10.6	-2.17018
10.6167	-2.15538
10.6333	-2.15462
10.65	-2.16026
10.6667	-2.1627
10.6833	-2.16454
10.7	-2.17781
10.7167	-2.18178
10.7333	-2.19612
10.75	-2.21153
10.7667	-2.19353
10.7833	-2.18605
10.8	-2.19261
10.8167	-2.20177
10.8333	-2.20924
10.85	-2.22404
10.8667	-2.21321
10.8833	-2.20207
10.9	-2.23396
10.9167	-2.24922
10.9333	-2.25349
10.95	-2.24785
10.9667	-2.26372
10.9833	-2.257
11	-2.26784
11.0167	-2.26952
11.0333	-2.27837
11.05	-2.3069
11.0667	-2.3217
11.0833	-2.32582
11.1	-2.32231
11.1167	-2.31514
11.1333	-2.32323
11.15	-2.33696
11.1667	-2.35222
11.1833	-2.34032
11.2	-2.33604
11.2167	-2.34596
11.2333	-2.37282
11.25	-2.38029
11.2667	-2.39128
11.2833	-2.39418
11.3	-2.42256
11.3167	-2.41142
11.3333	-2.41966
11.35	-2.43492
11.3667	-2.43279
11.3833	-2.44988
11.4	-2.46864
11.4167	-2.5042
11.4333	-2.5222
11.45	-2.52617
11.4667	-2.53777
11.4833	-2.54143
11.5	-2.54906
11.5167	-2.5724
11.5333	-2.59819
11.55	-2.61955
11.5667	-2.63329
11.5833	-2.67235
11.6	-2.68394
11.6167	-2.7018
11.6333	-2.71248
11.65	-2.74605
11.6667	-2.77596
11.6833	-2.79091
11.7	-2.82997
11.7167	-2.85683
11.7333	-2.89528
11.75	-2.92793
11.7667	-2.97874
11.7833	-2.99614
11.8	-3.01079
11.8167	-3.0143
11.8333	-3.04054
11.85	-3.07625
11.8667	-3.10341
11.8833	-3.13972
11.9	-3.18016
11.9167	-3.19359
11.9333	-3.22212
11.95	-3.24821
11.9667	-3.29323
11.9833	-3.33336
12	-3.36922
12.0167	-3.40065
12.0333	-3.41042
12.05	-3.45955
12.0667	-3.4951
12.0833	-3.50685
12.1	-3.53691
12.1167	-3.56361
12.1333	-3.60863
12.15	-3.65013
12.1667	-3.68294
12.1833	-3.72566
12.2	-3.7693
12.2167	-3.83949
12.2333	-3.86223
12.25	-3.90068
12.2667	-3.94508
12.2833	-3.97514
12.3	-3.99788
12.3167	-4.06166
12.3333	-4.07311
12.35	-4.10561
12.3667	-4.14375
12.3833	-4.17046
12.4	-4.21654
12.4167	-4.24812
12.4333	-4.26781
12.45	-4.31038
12.4667	-4.35234
12.4833	-4.36867
12.5	-4.41063
12.5167	-4.44649
12.5333	-4.4915
12.55	-4.49944
12.5667	-4.51332
12.5833	-4.55376
12.6	-4.57924
12.6167	-4.61037
12.6333	-4.62456
12.65	-4.64668
12.6667	-4.66576
12.6833	-4.68452
12.7	-4.70268
12.7167	-4.71611
12.7333	-4.73091
12.75	-4.74464
12.7667	-4.77486
12.7833	-4.78447
12.8	-4.80217
12.8167	-4.81926
12.8333	-4.83925
12.85	-4.85008
12.8667	-4.84383
12.8833	-4.85069
12.9	-4.85573
12.9167	-4.87846
12.9333	-4.87114
12.95	-4.87404
12.9667	-4.88731
12.9833	-4.8893
13	-4.88731
13.0167	-4.87816
13.0333	-4.89632
13.05	-4.88213
13.0667	-4.86717
13.0833	-4.8719
13.1	-4.85344
13.1167	-4.85481
13.1333	-4.83696
13.15	-4.83086
13.1667	-4.8304
13.1833	-4.79637
13.2	-4.78722
13.2167	-4.78386
13.2333	-4.77364
13.25	-4.74052
13.2667	-4.74358
13.2833	-4.71947
13.3	-4.70314
13.3167	-4.68452
13.3333	-4.6714
13.35	-4.67262
13.3667	-4.66499
13.3833	-4.63158
13.4	-4.61586
13.4167	-4.61571
13.4333	-4.59755
13.45	-4.57146
13.4667	-4.55406
13.4833	-4.54094
13.5	-4.54048
13.5167	-4.5179
13.5333	-4.50356
13.55	-4.50127
13.5667	-4.48235
13.5833	-4.46495
13.6	-4.42497
13.6167	-4.42543
13.6333	-4.3972
13.65	-4.3792
13.6667	-4.36668
13.6833	-4.35417
13.7	-4.33693
13.7167	-4.30412
13.7333	-4.28246
13.75	-4.27376
13.7667	-4.24461
13.7833	-4.22737
13.8	-4.1996
13.8167	-4.17488
13.8333	-4.1552
13.85	-4.12621
13.8667	-4.10851
13.8833	-4.07387
13.9	-4.05388
13.9167	-4.0255
13.9333	-4.02031
13.95	-3.99422
13.9667	-3.97331
13.9833	-3.95012
14	-3.91136
14.0167	-3.88374
14.0333	-3.8575
14.05	-3.83705
14.0667	-3.83461
14.0833	-3.80302
14.1	-3.78868
14.1167	-3.77007
14.1333	-3.76564
14.15	-3.73558
14.1667	-3.68767
14.1833	-3.66707
14.2	-3.64067
14.2167	-3.63335
14.2333	-3.60237
14.25	-3.57292
14.2667	-3.55553
14.2833	-3.52104
14.3	-3.51463
14.3167	-3.49709
14.3333	-3.46489
14.35	-3.45116
14.3667	-3.42613
14.3833	-3.40538
14.4	-3.38768
14.4167	-3.35976
14.4333	-3.35365
14.45	-3.34114
14.4667	-3.31108
14.4833	-3.2943
14.5	-3.28621
14.5167	-3.26408
14.5333	-3.22899
14.55	-3.20396
14.5667	-3.1884
14.5833	-3.16399
14.6	-3.15788
14.6167	-3.13377
14.6333	-3.12492
14.65	-3.10478
14.6667	-3.07228
14.6833	-3.06786
14.7	-3.05779
14.7167	-3.04054
14.7333	-3.03123
14.75	-3.00072
14.7667	-2.98088
14.7833	-2.98256
14.8	-2.98103
14.8167	-2.96196
14.8333	-2.94304
14.85	-2.93831
14.8667	-2.91405
14.8833	-2.89757
14.9	-2.88597
14.9167	-2.87254
14.9333	-2.87987
14.95	-2.87468
14.9667	-2.85561
14.9833	-2.82707
15	-2.81502
15.0167	-2.81136
15.0333	-2.83119
15.05	-2.82997
15.0667	-2.80708
15.0833	-2.76207
15.1	-2.76772
15.1167	-2.77702
15.1333	-2.74925
15.15	-2.72804
15.1667	-2.70165
15.1833	-2.69905
15.2	-2.69936
15.2167	-2.67799
15.2333	-2.67509
15.25	-2.6609
15.2667	-2.65373
15.2833	-2.64641
15.3	-2.64046
15.3167	-2.63084
15.3333	-2.60628
15.35	-2.60628
15.3667	-2.61482
15.3833	-2.59377
15.4	-2.58019
15.4167	-2.5808
15.4333	-2.57286
15.45	-2.56126
15.4667	-2.55928
15.4833	-2.54921
15.5	-2.55333
15.5167	-2.55592
15.5333	-2.56371
15.55	-2.53639
15.5667	-2.5309
15.5833	-2.52861
15.6	-2.51289
15.6167	-2.51854
15.6333	-2.50542
15.65	-2.50267
15.6667	-2.48985
15.6833	-2.48375
15.7	-2.48177
15.7167	-2.49641
15.7333	-2.49565
15.75	-2.4781
15.7667	-2.48924
15.7833	-2.47749
15.8	-2.47307
15.8167	-2.46727
15.8333	-2.45796
15.85	-2.43614
15.8667	-2.44423
15.8833	-2.44911
15.9	-2.44621
15.9167	-2.44347
15.9333	-2.44209
15.95	-2.4305
15.9667	-2.42668
15.9833	-2.42622
16	-2.43126
16.0167	-2.43797
16.0333	-2.41646
16.05	-2.41661
16.0667	-2.40028
16.0833	-2.41386
16.1	-2.4157
16.1167	-2.39769
16.1333	-2.38899
16.15	-2.40486
16.1667	-2.38915
16.1833	-2.39128
16.2	-2.38945
16.2167	-2.38091
16.2333	-2.38655
16.25	-2.38396
16.2667	-2.37831
16.2833	-2.38472
16.3	-2.37206
16.3167	-2.36549
16.3333	-2.36595
16.35	-2.34016
16.3667	-2.34566
16.3833	-2.33986
16.4	-2.3333
16.4167	-2.32384
16.4333	-2.34337
16.45	-2.32704
16.4667	-2.32994
16.4833	-2.33299
16.5	-2.33192
16.5167	-2.35771
16.5333	-2.36717
16.55	-2.34688
16.5667	-2.33482
16.5833	-2.3394
16.6	-2.33742
16.6167	-2.34932
16.6333	-2.33971
16.65	-2.34016
16.6667	-2.3455
16.6833	-2.34154
16.7	-2.35115
16.7167	-2.33589
16.7333	-2.32414
16.75	-2.33299
16.7667	-2.33192
16.7833	-2.32185
16.8	-2.33299
16.8167	-2.34459
16.8333	-2.34993
16.85	-2.33864
16.8667	-2.34734
16.8833	-2.33849
16.9	-2.34123
16.9167	-2.33772
16.9333	-2.3336
16.95	-2.32872
16.9667	-2.33437
16.9833	-2.33955
17	-2.35115
17.0167	-2.33681
17.0333	-2.33101
17.05	-2.31972
17.0667	-2.32765
17.0833	-2.31255
17.1	-2.31773
17.1167	-2.32567
17.1333	-2.33604
17.15	-2.32979
17.1667	-2.33101
17.1833	-2.34413
17.2	-2.36488
17.2167	-2.35664
17.2333	-2.3481
17.25	-2.34947
17.2667	-2.34123
17.2833	-2.34901
17.3	-2.36458
17.3167	-2.35268
17.3333	-2.34276
17.35	-2.34139
17.3667	-2.33376
17.3833	-2.33925
17.4	-2.34688
17.4167	-2.32887
17.4333	-2.32079
17.45	-2.32552
17.4667	-2.3484
17.4833	-2.33788
17.5	-2.32765
17.5167	-2.3307
17.5333	-2.32735
17.55	-2.33315
17.5667	-2.30644
17.5833	-2.32002
17.6	-2.32628
17.6167	-2.33131
17.6333	-2.31972
17.65	-2.31163
17.6667	-2.31941
17.6833	-2.31789
17.7	-2.3278
17.7167	-2.34718
17.7333	-2.34703
17.75	-2.34169
17.7667	-2.32414
17.7833	-2.33849
17.8	-2.33391
17.8167	-2.31331
17.8333	-2.30446
17.85	-2.31239
17.8667	-2.32216
17.8833	-2.32842
17.9	-2.33391
17.9167	-2.3307
17.9333	-2.34306
17.95	-2.34291
17.9667	-2.35191
17.9833	-2.3661
18	-2.39418
18.0167	-2.40212
18.0333	-2.40929
18.05	-2.41356
18.0667	-2.41508
18.0833	-2.41524
18.1	-2.4305
18.1167	-2.44896
18.1333	-2.42805
18.15	-2.43599
18.1667	-2.43813
18.1833	-2.44713
18.2	-2.45399
18.2167	-2.45216
18.2333	-2.44164
18.25	-2.43095
18.2667	-2.43675
18.2833	-2.43217
18.3	-2.40974
18.3167	-2.38609
18.3333	-2.38548
18.35	-2.40135
18.3667	-2.38365
18.3833	-2.38701
18.4	-2.39082
18.4167	-2.39403
18.4333	-2.38335
18.45	-2.36488
18.4667	-2.35527
18.4833	-2.35497
18.5	-2.34795
18.5167	-2.34215
18.5333	-2.33727
18.55	-2.3278
18.5667	-2.32979
18.5833	-2.3333
18.6	-2.31499
18.6167	-2.31224
18.6333	-2.31087
18.65	-2.30492
18.6667	-2.3069
18.6833	-2.2979
18.7	-2.28996
18.7167	-2.27821
18.7333	-2.27516
18.75	-2.2683
18.7667	-2.25243
18.7833	-2.24953
18.8	-2.2274
18.8167	-2.22191
18.8333	-2.20161
18.85	-2.20222
18.8667	-2.17888
18.8833	-2.1505
18.9	-2.1302
18.9167	-2.09709
18.9333	-2.06108
18.95	-2.06062
18.9667	-2.0327
18.9833	-1.99409
19	-1.97807
19.0167	-1.95
19.0333	-1.94725
19.05	-1.92116
19.0667	-1.90437
19.0833	-1.89522
19.1	-1.88393
19.1167	-1.8647
19.1333	-1.86363
19.15	-1.85631
19.1667	-1.84776
19.1833	-1.82869
19.2	-1.84059
19.2167	-1.85524
19.2333	-1.86394
19.25	-1.85768
19.2667	-1.85799
19.2833	-1.82777
19.3	-1.81618
19.3167	-1.80061
19.3333	-1.78429
19.35	-1.78139
19.3667	-1.76048
19.3833	-1.73363
19.4	-1.7086
19.4167	-1.67534
19.4333	-1.65001
19.45	-1.60011
19.4667	-1.51634
19.4833	-1.43776
19.5	-1.35994
19.5167	-1.25084
19.5333	-1.14357
19.55	-1.02776
19.5667	-0.88356
19.5833	-0.714188
19.6	-0.572891
19.6167	-0.413895
19.6333	-0.240555
19.65	-0.0754547
19.6667	0.0978851
19.6833	0.247726
19.7	0.377121
19.7167	0.489578
19.7333	0.574875
19.75	0.641403
19.7667	0.678635
19.7833	0.689774
19.8	0.660324
19.8167	0.60936
19.8333	0.54924
19.85	0.465317
19.8667	0.364914
19.8833	0.244217
19.9	0.135269
19.9167	-0.00267029
19.9333	-0.140915
19.95	-0.273209
19.9667	-0.40535
19.9833	-0.524521
20	-0.651474
20.0167	-0.752945
20.0333	-0.871048
20.05	-0.972214
20.0667	-1.07597
20.0833	-1.14906
20.1	-1.24046
20.1167	-1.34438
20.1333	-1.42708
20.15	-1.5078
20.1667	-1.60088
20.1833	-1.69655
20.2	-1.79878
20.2167	-1.92238
20.2333	-2.04674
20.25	-2.21764
20.2667	-2.40654
20.2833	-2.61559
20.3	-2.85881
20.3167	-3.14171
20.3333	-3.46916
20.35	-3.84087
20.3667	-4.25499
20.3833	-4.73427
20.4	-5.25093
20.4167	-5.80101
20.4333	-6.38786
20.45	-7.02339
20.4667	-7.68044
20.4833	-8.33473
20.5	-8.99849
20.5167	-9.65141
20.5333	-10.2915
20.55	-10.8826
20.5667	-11.4436
20.5833	-11.9642
20.6	-12.4165
20.6167	-12.801
20.6333	-13.1239
20.65	-13.3564
20.6667	-13.5183
20.6833	-13.6039
20.7	-13.6131
20.7167	-13.5456
20.7333	-13.4403
20.75	-13.2522
20.7667	-13.0453
20.7833	-12.7995
20.8	-12.5312
20.8167	-12.2323
20.8333	-11.9224
20.85	-11.6256
20.8667	-11.336
20.8833	-11.052
20.9	-10.7558
20.9167	-10.4911
20.9333	-10.2383
20.95	-9.97826
20.9667	-9.73
20.9833	-9.50066
21	-9.28062
21.0167	-9.0638
21.0333	-8.84865
21.05	-8.64372
21.0667	-8.45238
21.0833	-8.23631
21.1	-8.01277
21.1167	-7.80815
21.1333	-7.61101
21.15	-7.40288
21.1667	-7.18697
21.1833	-6.97914
21.2	-6.77437
21.2167	-6.59111
21.2333	-6.37413
21.25	-6.1898
21.2667	-5.99281
21.2833	-5.81093
21.3	-5.61317
21.3167	-5.46196
21.3333	-5.30754
21.35	-5.15938
21.3667	-5.00359
21.3833	-4.86259
21.4	-4.74159
21.4167	-4.61601
21.4333	-4.52309
21.45	-4.40117
21.4667	-4.30794
21.4833	-4.22249
21.5	-4.13612
21.5167	-4.06075
21.5333	-3.97408
21.55	-3.90358
21.5667	-3.84865
21.5833	-3.77617
21.6	-3.72047
21.6167	-3.67851
21.6333	-3.6071
21.65	-3.56133
21.6667	-3.50945
21.6833	-3.47801
21.7	-3.43391
21.7167	-3.38905
21.7333	-3.35381
21.75	-3.31032
21.7667	-3.27705
21.7833	-3.25874
21.8	-3.2328
21.8167	-3.20839
21.8333	-3.17894
21.85	-3.13011
21.8667	-3.10951
21.8833	-3.0822
21.9	-3.04405
21.9167	-3.03505
21.9333	-3.00758
21.95	-2.97768
21.9667	-2.9641
21.9833	-2.94258
22	-2.92961
22.0167	-2.91451
22.0333	-2.90794
22.05	-2.88246
22.0667	-2.86293
22.0833	-2.86842
22.1	-2.86476
22.1167	-2.84233
22.1333	-2.82143
22.15	-2.82616
22.1667	-2.80449
22.1833	-2.78618
22.2	-2.78618
22.2167	-2.77519
22.2333	-2.75932
22.25	-2.72804
22.2667	-2.72926
22.2833	-2.7285
22.3	-2.71126
22.3167	-2.69432
22.3333	-2.6902
22.35	-2.68074
22.3667	-2.68227
22.3833	-2.67845
22.4	-2.67296
22.4167	-2.66319
22.4333	-2.65526
22.45	-2.65541
22.4667	-2.64839
22.4833	-2.63374
22.5	-2.61253
22.5167	-2.61299
22.5333	-2.58842
22.55	-2.5724
22.5667	-2.57637
22.5833	-2.58171
22.6	-2.56767
22.6167	-2.57423
22.6333	-2.56752
22.65	-2.54158
22.6667	-2.55775
22.6833	-2.55943
22.7	-2.54112
22.7167	-2.5309
22.7333	-2.52663
22.75	-2.52296
22.7667	-2.52434
22.7833	-2.52693
22.8	-2.50053
22.8167	-2.50282
22.8333	-2.50923
22.85	-2.50832
22.8667	-2.48009
22.8833	-2.46071
22.9	-2.4601
22.9167	-2.47566
22.9333	-2.48634
22.95	-2.47063
22.9667	-2.45995
22.9833	-2.44804
23	-2.44225
23.0167	-2.46269
23.0333	-2.45537
23.05	-2.45216
23.0667	-2.43065
23.0833	-2.43858
23.1	-2.43217
23.1167	-2.43599
23.1333	-2.43294
23.15	-2.4308
23.1667	-2.42912
23.1833	-2.43889
23.2	-2.42867
23.2167	-2.42241
23.2333	-2.41814
23.25	-2.42363
23.2667	-2.4337
23.2833	-2.44423
23.3	-2.42531
23.3167	-2.42226
23.3333	-2.43065
23.35	-2.41722
23.3667	-2.40547
23.3833	-2.3925
23.4	-2.4015
23.4167	-2.416
23.4333	-2.39983
23.45	-2.40227
23.4667	-2.40242
23.4833	-2.38701
23.5	-2.37785
23.5167	-2.37434
23.5333	-2.37831
23.55	-2.3806
23.5667	-2.36916
23.5833	-2.35863
23.6	-2.35054
23.6167	-2.36992
23.6333	-2.36153
23.65	-2.3568
23.6667	-2.35603
23.6833	-2.36
23.7	-2.36916
23.7167	-2.36885
23.7333	-2.36458
23.75	-2.36366
23.7667	-2.36153
23.7833	-2.36458
23.8	-2.36168
23.8167	-2.34947
23.8333	-2.33498
23.85	-2.35039
23.8667	-2.36076
23.8833	-2.34627
23.9	-2.33757
23.9167	-2.32597
23.9333	-2.31956
23.95	-2.33055
23.9667	-2.34367
23.9833	-2.33711
24	-2.36198
24.0167	-2.36153
24.0333	-2.35771
24.05	-2.34108
24.0667	-2.32445
24.0833	-2.32491
24.1	-2.30186
24.1167	-2.31483
24.1333	-2.31926
24.15	-2.28722
24.1667	-2.29363
24.1833	-2.32033
24.2	-2.30614
24.2167	-2.30827
24.2333	-2.30568
24.25	-2.30492
24.2667	-2.3008
24.2833	-2.29515
24.3	-2.28935
24.3167	-2.28859
24.3333	-2.295
24.35	-2.29851
24.3667	-2.30904
24.3833	-2.28874
24.4	-2.27989
24.4167	-2.28752
24.4333	-2.28706
24.45	-2.29088
24.4667	-2.29774
24.4833	-2.29179
24.5	-2.29256
24.5167	-2.28859
24.5333	-2.2715
24.55	-2.28874
24.5667	-2.28813
24.5833	-2.28493
24.6	-2.28264
24.6167	-2.28554
24.6333	-2.28096
24.65	-2.28081
24.6667	-2.28798
24.6833	-2.28981
24.7	-2.30049
24.7167	-2.28249
24.7333	-2.26662
24.75	-2.28264
24.7667	-2.26753
24.7833	-2.26799
24.8	-2.26723
24.8167	-2.28096
24.8333	-2.26814
24.85	-2.27608
24.8667	-2.26326
24.8833	-2.27592
24.9	-2.27684
24.9167	-2.27867
24.9333	-2.26433
24.95	-2.26936
24.9667	-2.27943
24.9833	-2.28889
25	-2.27074
25.0167	-2.29134
25.0333	-2.29317
25.05	-2.28645
25.0667	-2.27959
25.0833	-2.26982
25.1	-2.28218
25.1167	-2.2805
25.1333	-2.27196
25.15	-2.28966
25.1667	-2.27974
25.1833	-2.28325
25.2	-2.26479
25.2167	-2.26448
25.2333	-2.27226
25.25	-2.27089
25.2667	-2.25822
25.2833	-2.26204
25.3	-2.26128
25.3167	-2.27867
25.3333	-2.26967
25.35	-2.27028
25.3667	-2.28432
25.3833	-2.28737
25.4	-2.28111
25.4167	-2.29179
25.4333	-2.27669
25.45	-2.27455
25.4667	-2.28371
25.4833	-2.2834
25.5	-2.27699
25.5167	-2.27654
25.5333	-2.28249
25.55	-2.26433
25.5667	-2.27104
25.5833	-2.28676
25.6	-2.27547
25.6167	-2.2831
25.6333	-2.29363
25.65	-2.29256
25.6667	-2.29744
25.6833	-2.29454
25.7	-2.28966
25.7167	-2.28615
25.7333	-2.29256
25.75	-2.31117
25.7667	-2.29958
25.7833	-2.30034
25.8	-2.30293
25.8167	-2.29759
25.8333	-2.28355
25.85	-2.2863
25.8667	-2.28706
25.8833	-2.29195
25.9	-2.27165
25.9167	-2.26769
25.9333	-2.27043
25.95	-2.26082
25.9667	-2.27348
25.9833	-2.27913
26	-2.28859
26.0167	-2.28249
26.0333	-2.29408
26.05	-2.27226
26.0667	-2.27943
26.0833	-2.27608
26.1	-2.27974
26.1167	-2.28294
26.1333	-2.27806
26.15	-2.26418
26.1667	-2.25685
26.1833	-2.27104
26.2	-2.25349
26.2167	-2.24861
26.2333	-2.27562
26.25	-2.26173
26.2667	-2.24464
26.2833	-2.24297
26.3	-2.25395
26.3167	-2.26234
26.3333	-2.26128
26.35	-2.26738
26.3667	-2.26128
26.3833	-2.2567
26.4	-2.24236
26.4167	-2.25227
26.4333	-2.2509
26.45	-2.25426
26.4667	-2.25914
26.4833	-2.25441
26.5	-2.26082
26.5167	-2.25807
26.5333	-2.25899
26.55	-2.26357
26.5667	-2.25914
26.5833	-2.26784
26.6	-2.25609
26.6167	-2.25624
26.6333	-2.24312
26.65	-2.24663
26.6667	-2.22908
26.6833	-2.22908
26.7	-2.22832
26.7167	-2.23564
26.7333	-2.22435
26.75	-2.22389
26.7667	-2.21519
26.7833	-2.21886
26.8	-2.22557
26.8167	-2.22313
26.8333	-2.22527
26.85	-2.22542
26.8667	-2.20467
26.8833	-2.19704
26.9	-2.18834
26.9167	-2.16087
26.9333	-2.16393
26.95	-2.16042
26.9667	-2.14195
26.9833	-2.1032
27	-2.09068
27.0167	-2.04842
27.0333	-2.00233
27.05	-1.9796
27.0667	-1.94115
27.0833	-1.90041
27.1	-1.83586
27.1167	-1.78734
27.1333	-1.75575
27.15	-1.68571
27.1667	-1.61247
27.1833	-1.54884
27.2	-1.45973
27.2167	-1.37505
27.2333	-1.28288
27.25	-1.20705
27.2667	-1.10466
27.2833	-0.994186
27.3	-0.88234
27.3167	-0.784531
27.3333	-0.681534
27.35	-0.56282
27.3667	-0.45784
27.3833	-0.336533
27.4	-0.225906
27.4167	-0.112228
27.4333	-0.00465393
27.45	0.10231
27.4667	0.20607
27.4833	0.295792
27.5	0.387497
27.5167	0.481186
27.5333	0.559921
27.55	0.615616
27.5667	0.674057
27.5833	0.747757
27.6	0.785599
27.6167	0.814896
27.6333	0.85289
27.65	0.881119
27.6667	0.896835
27.6833	0.900955
27.7	0.896988
27.7167	0.867996
27.7333	0.832443
27.75	0.812607
27.7667	0.775833
27.7833	0.755386
27.8	0.715256
27.8167	0.679092
27.8333	0.62233
27.85	0.537033
27.8667	0.475388
27.8833	0.3965
27.9	0.350723
27.9167	0.271378
27.9333	0.173874
27.95	0.0972748
27.9667	0.0373077
27.9833	-0.0255585
28	-0.105209
28.0167	-0.168076
28.0333	-0.236588
28.05	-0.297318
28.0667	-0.35881
28.0833	-0.432358
28.1	-0.485764
28.1167	-0.548782
28.1333	-0.610123
28.15	-0.656204
28.1667	-0.721817
28.1833	-0.772018
28.2	-0.820084
28.2167	-0.867996
28.2333	-0.900192
28.25	-0.958023
28.2667	-0.997543
28.2833	-1.02272
28.3	-1.07414
28.3167	-1.1161
28.3333	-1.14586
28.35	-1.16753
28.3667	-1.20735
28.3833	-1.23039
28.4	-1.25221
28.4167	-1.29677
28.4333	-1.31218
28.45	-1.334
28.4667	-1.35643
28.4833	-1.36864
28.5	-1.38985
28.5167	-1.41014
28.5333	-1.44005
28.55	-1.44341
28.5667	-1.47621
28.5833	-1.49635
28.6	-1.50551
28.6167	-1.5078
28.6333	-1.5229
28.65	-1.5403
28.6667	-1.55785
28.6833	-1.55968
28.7	-1.56715
28.7167	-1.56715
28.7333	-1.58272
28.75	-1.61629
28.7667	-1.62132
28.7833	-1.64101
28.8	-1.6671
28.8167	-1.67107
28.8333	-1.6851
28.85	-1.70631
28.8667	-1.71455
28.8833	-1.71211
28.9	-1.71913
28.9167	-1.73515
28.9333	-1.72585
28.95	-1.74126
28.9667	-1.75133
28.9833	-1.74706
29	-1.76659
29.0167	-1.77925
29.0333	-1.80031
29.05	-1.8026
29.0667	-1.81664
29.0833	-1.82426
29.1	-1.84273
29.1167	-1.85127
29.1333	-1.8502
29.15	-1.83708
29.1667	-1.8354
29.1833	-1.84807
29.2	-1.86272
29.2167	-1.86852
29.2333	-1.86775
29.25	-1.89003
29.2667	-1.89812
29.2833	-1.89903
29.3	-1.89888
29.3167	-1.91017
29.3333	-1.90437
29.35	-1.91185
29.3667	-1.91826
29.3833	-1.92497
29.4	-1.92726
29.4167	-1.9445
29.4333	-1.9416
29.45	-1.94664
29.4667	-1.94923
29.4833	-1.95961
29.5	-1.97014
29.5167	-1.98357
29.5333	-1.97151
29.55	-1.96861
29.5667	-1.97578
29.5833	-1.99974
29.6	-1.98875
29.6167	-1.98097
29.6333	-1.99867
29.65	-1.99593
29.6667	-2.00356
29.6833	-2.01515
29.7	-2.00066
29.7167	-2.00813
29.7333	-2.00661
29.75	-2.00401
29.7667	-2.00386
29.7833	-2.02248
29.8	-2.02782
29.8167	-2.03697
29.8333	-2.03911
29.85	-2.04018
29.8667	-2.06749
29.8833	-2.07298
29.9	-2.0768
29.9167	-2.07268
29.9333	-2.07191
29.95	-2.08702
29.9667	-2.09114
29.9833	-2.08092
30	-2.09587

## Sheet: MW Results
Administrative Information
File name	ICF_04_12_2024-0009.sample
Analysed by	OBPC
Date of analysis	10 December 2024 09:42:55
Analysis comments
Analysis Module	GPC Analysis
MW Averages
Peaks	Mp (g/mol)	Mn (g/mol)	Mw (g/mol)	Mz (g/mol)	Mz+1 (g/mol)	Mv (g/mol)	PD
Peak 1	176451	37979	270355	939937	1903120	819935	7.11854
Sample Parameters
Injection volume (µL)	200
Concentration options	Undefined
Concentration (mg/mL)	1
dn/dc (mL/g)	0.1
UV extinction coefficient [(mg/mL)-¹][cm-¹]	1
Mark-Houwink K ((10e-5) dL/g)	14.1
Mark-Houwink Alpha	0.7
Concentration Detector Used in Analysis	RI
Baseline regions	Start (mins)	End (mins)
Baseline region 1	6.16667	7.66667
Baseline region 2	17.6833	17.8167
Peaks	Start (mins)	End (mins)
Peak 1	10.5833	16.7167
	Trace	Peak Max RT (mins)	Peak Area (mV.s)	Peak Height (mV)
	RI	13.0333	386.83	-2.71342
Flowrate region	Start (mins)	End (mins)
IDD
Reference detector	Undefined
IDD Undefined (secs)	0
Last modified by	OBPC
Last modified date	10 December 2024 09:42:55
Comments
System Calibration
Detector Constants
Entered Parameters For Concentration
Concentration (mg/mL)	0
Injection volume (µL)	0
dn/dc (mL/g)	0
UV extinction coefficient [(mg/mL)-¹][cm-¹]	0
Eluent refractive index	0
Flow rate (mL/min)	0
Comments
Entered Parameters For LS
Mp	0
LS wavelength (nm)	0
Comments
Entered Parameters For Viscometer
Known IV (dL/g)	0
Use Constant Inlet Pressure	No
Comments
System Calibration Information
Created by	OBPC
Creation date	29 October 2024 11:18:00
Last modified by	OBPC
Last modified date	29 October 2024 11:18:00
Information
Sample file used for calibration
Concentration Regions
Baseline regions	Start (mins)	End (mins)
Peaks	Start (mins)	End (mins)
Flowrate region	Start (mins)	End (mins)
LS Regions
Baseline regions	Start (mins)	End (mins)
Peaks	Start (mins)	End (mins)
Flowrate region	Start (mins)	End (mins)
VS Regions
Baseline regions	Start (mins)	End (mins)
Peaks	Start (mins)	End (mins)
Flowrate region	Start (mins)	End (mins)
System Calibration Peak Information
Channel	Peak Max RT (mins)	Peak Height (mV)	Peak Area (mV.s)
Flowrate Information
FRM Name
FRM RT (mins)	0
FRCF	1
Column Calibration
Name	2024-10-29-001
Created By	OBPC
Creation Date	29/10/2024 16:43:21
Last Modified By	OBPC
Last Modified	29/10/2024 16:46:00
High Limit RT (mins)	10.3167
Low Limit RT (mins)	17.05
High Limit MW	6542896
Low Limit MW	585
K (Input) ((10e-5) dL/g)	14.1
Alpha (Input)	0.7
Calibration Flow Marker Name
Calibration Flow Marker RT (mins)	0
Calibration Comments	GPC Column Calibration created 29 October 2024 by OBPC GPC Column Calibration amended 29 October 2024 by OBPC GPC Column Calibration amended 29 October 2024 by OBPC
Calibration Type	GPC Narrow Standard
Curve Fit Type	Polynomial
Order Of Curve Fit	5
Number Of Points	11
Curve Fit Equation	y = - 0.0006266x^5 + 0.04142x^4 - 1.085x^3 + 14.06x^2 - 90.8x + 242.2
Coeff a	242.186
Coeff b	-90.7983
Coeff c	14.0588
Coeff d	-1.08465
Coeff e	0.0414232
Coeff f	-0.000626569
Residual Sum Of Squares	0.000581819
Corrected Sum Of Squares	18.6999
Coefficient Of Determination	0.999969
Standard Y Error Estimate	0.0107872
Linear Correlation Coefficient	-0.999868

## Sheet: Slice Table
Slice Table
RT (mins)	RI	Norm Ht	Cum Ht	Mw (g/mol)	logM	dwdlogM	Outside Calib	Peak
10.5833	-0.0697652	0.000180327	0.999913	4568143	6.65974	0.0182409	No	1
10.6	-0.0652638	0.000168692	0.999751	4468690	6.65018	0.0155894	No	1
10.6167	-0.0499287	0.000129054	0.999613	4371571	6.64064	0.0133614	No	1
10.6333	-0.0486317	0.000125701	0.999483	4276720	6.63111	0.0139012	No	1
10.65	-0.0537434	0.000138914	0.999346	4184073	6.6216	0.0148772	No	1
10.6667	-0.0556507	0.000143844	0.999203	4093567	6.6121	0.0153352	No	1
10.6833	-0.0569477	0.000147196	0.999048	4005142	6.60262	0.0172707	No	1
10.7	-0.0696887	0.000180129	0.998874	3918740	6.59315	0.0195016	No	1
10.7167	-0.0731219	0.000189003	0.998678	3834305	6.58369	0.0218823	No	1
10.7333	-0.0869311	0.000224696	0.998453	3751785	6.57424	0.0258331	No	1
10.75	-0.101808	0.000263151	0.998211	3671126	6.5648	0.025358	No	1
10.7667	-0.083269	0.000215231	0.997989	3592279	6.55537	0.021741	No	1
10.7833	-0.0752581	0.000194524	0.997786	3515195	6.54595	0.0214878	No	1
10.8	-0.0812853	0.000210103	0.997574	3439827	6.53654	0.0235172	No	1
10.8167	-0.0899065	0.000232387	0.997342	3366131	6.52713	0.0256738	No	1
10.8333	-0.0968492	0.000250332	0.997087	3294063	6.51773	0.028608	No	1
10.85	-0.111116	0.000287209	0.996817	3223580	6.50834	0.0290235	No	1
10.8667	-0.0997483	0.000257826	0.996559	3154641	6.49895	0.0258651	No	1
10.8833	-0.0880753	0.000227654	0.996303	3087208	6.48957	0.028588	No	1
10.9	-0.119432	0.000308704	0.996005	3021243	6.48019	0.0349492	No	1
10.9167	-0.134157	0.000346764	0.995666	2956707	6.47081	0.0375047	No	1
10.9333	-0.137895	0.000356426	0.995316	2893567	6.46143	0.0371766	No	1
10.95	-0.131715	0.000340453	0.994961	2831786	6.45206	0.0384451	No	1
10.9667	-0.14705	0.000380091	0.994596	2771333	6.44269	0.0395643	No	1
10.9833	-0.139802	0.000361356	0.994223	2712173	6.43332	0.0399865	No	1
11	-0.150102	0.000387978	0.993841	2654277	6.42395	0.0415639	No	1
11.0167	-0.151246	0.000390936	0.993445	2597613	6.41457	0.042865	No	1
11.0333	-0.159563	0.000412431	0.99302	2542153	6.4052	0.0478665	No	1
11.05	-0.187562	0.000484804	0.992544	2487868	6.39583	0.053684	No	1
11.0667	-0.201829	0.000521681	0.992029	2434729	6.38645	0.0561308	No	1
11.0833	-0.205415	0.000530949	0.991503	2382711	6.37707	0.0560502	No	1
11.1	-0.201371	0.000520498	0.990985	2331787	6.36769	0.0544114	No	1
11.1167	-0.193666	0.00050058	0.990474	2281933	6.3583	0.0543677	No	1
11.1333	-0.201219	0.000520103	0.989951	2233122	6.34891	0.0571981	No	1
11.15	-0.214418	0.000554219	0.989395	2185333	6.33952	0.0610094	No	1
11.1667	-0.229142	0.000592279	0.98882	2138541	6.33012	0.0612897	No	1
11.1833	-0.216706	0.000560135	0.988255	2092725	6.32071	0.0588835	No	1
11.2	-0.2119	0.000547711	0.987698	2047862	6.3113	0.0594735	No	1
11.2167	-0.221284	0.000571967	0.987115	2003932	6.30188	0.0643308	No	1
11.2333	-0.247605	0.000640001	0.986488	1960914	6.29246	0.0688436	No	1
11.25	-0.254548	0.000657947	0.985828	1918787	6.28303	0.0711729	No	1
11.2667	-0.265	0.000684963	0.985148	1877533	6.27359	0.072869	No	1
11.2833	-0.267365	0.000691077	0.98444	1837132	6.26414	0.0769384	No	1
11.3	-0.295213	0.000763055	0.983702	1797566	6.25468	0.0790796	No	1
11.3167	-0.28354	0.000732883	0.982957	1758818	6.24522	0.0784645	No	1
11.3333	-0.291245	0.000752801	0.982199	1720869	6.23575	0.081448	No	1
11.35	-0.30597	0.00079086	0.98142	1683703	6.22627	0.0830091	No	1
11.3667	-0.3033	0.000783958	0.980623	1647303	6.21677	0.0848136	No	1
11.3833	-0.319856	0.000826751	0.979795	1611653	6.20727	0.0894538	No	1
11.4	-0.33809	0.000873882	0.97891	1576738	6.19776	0.0965889	No	1
11.4167	-0.373109	0.000964398	0.977957	1542542	6.18824	0.103602	No	1
11.4333	-0.39058	0.00100956	0.976957	1509050	6.1787	0.106316	No	1
11.45	-0.394013	0.00101843	0.975933	1476247	6.16916	0.108154	No	1
11.4667	-0.405076	0.00104703	0.974891	1444121	6.1596	0.109943	No	1
11.4833	-0.408204	0.00105511	0.973833	1412655	6.15004	0.11119	No	1
11.5	-0.415299	0.00107345	0.97275	1381838	6.14046	0.115085	No	1
11.5167	-0.438111	0.00113241	0.971615	1351656	6.13087	0.121414	No	1
11.5333	-0.463364	0.00119769	0.97042	1322097	6.12126	0.127457	No	1
11.55	-0.484192	0.00125152	0.969174	1293146	6.11165	0.131862	No	1
11.5667	-0.497391	0.00128564	0.967871	1264793	6.10202	0.138628	No	1
11.5833	-0.53592	0.00138523	0.966504	1237025	6.09238	0.145088	No	1
11.6	-0.546982	0.00141382	0.965086	1209831	6.08272	0.148689	No	1
11.6167	-0.564301	0.00145858	0.963632	1183199	6.07306	0.152157	No	1
11.6333	-0.574448	0.00148481	0.962132	1157118	6.06338	0.157709	No	1
11.65	-0.607483	0.0015702	0.960564	1131576	6.05368	0.165806	No	1
11.6667	-0.636856	0.00164612	0.958927	1106564	6.04398	0.1714	No	1
11.6833	-0.651276	0.00168339	0.957228	1082071	6.03426	0.178194	No	1
11.7	-0.689804	0.00178298	0.955453	1058087	6.02452	0.186545	No	1
11.7167	-0.716126	0.00185102	0.953594	1034600	6.01477	0.19479	No	1
11.7333	-0.754044	0.00194903	0.951648	1011603	6.00501	0.203776	No	1
11.75	-0.786164	0.00203205	0.949604	989085	5.99523	0.214367	No	1
11.7667	-0.836441	0.002162	0.947463	967036	5.98544	0.222914	No	1
11.7833	-0.853302	0.00220558	0.945259	945448	5.97564	0.22667	No	1
11.8	-0.867417	0.00224207	0.943024	924311	5.96582	0.228587	No	1
11.8167	-0.870392	0.00224976	0.940759	903617	5.95598	0.23202	No	1
11.8333	-0.896103	0.00231621	0.938437	883357	5.94614	0.239665	No	1
11.85	-0.931275	0.00240712	0.936035	863523	5.93627	0.247407	No	1
11.8667	-0.957901	0.00247595	0.933553	844105	5.9264	0.255205	No	1
11.8833	-0.993683	0.00256844	0.930981	825097	5.91651	0.264713	No	1
11.9	-1.03358	0.00267157	0.928327	806490	5.9066	0.271208	No	1
11.9167	-1.04648	0.0027049	0.925612	788276	5.89668	0.276135	No	1
11.9333	-1.07448	0.00277727	0.922836	770447	5.88674	0.282694	No	1
11.95	-1.10004	0.00284333	0.91998	752997	5.87679	0.291373	No	1
11.9667	-1.14452	0.0029583	0.917024	735917	5.86683	0.301847	No	1
11.9833	-1.18411	0.00306065	0.913966	719201	5.85685	0.311107	No	1
12	-1.21944	0.00315196	0.910816	702841	5.84686	0.319216	No	1
12.0167	-1.25034	0.00323182	0.907598	686830	5.83685	0.323936	No	1
12.0333	-1.25957	0.00325568	0.904316	671161	5.82683	0.330925	No	1
12.05	-1.30817	0.0033813	0.900944	655829	5.81679	0.341214	No	1
12.0667	-1.34319	0.00347182	0.897487	640825	5.80674	0.346672	No	1
12.0833	-1.3544	0.00350081	0.893973	626145	5.79667	0.351412	No	1
12.1	-1.38393	0.00357712	0.890398	611781	5.7866	0.358057	No	1
12.1167	-1.41009	0.00364476	0.886741	597726	5.7765	0.366601	No	1
12.1333	-1.45457	0.00375973	0.882983	583976	5.76639	0.377015	No	1
12.15	-1.49554	0.00386563	0.879122	570524	5.75627	0.385846	No	1
12.1667	-1.52782	0.00394904	0.875166	557364	5.74614	0.394813	No	1
12.1833	-1.57001	0.0040581	0.871107	544491	5.73599	0.405138	No	1
12.2	-1.61311	0.00416952	0.86692	531898	5.72583	0.418931	No	1
12.2167	-1.68277	0.00434956	0.862601	519580	5.71565	0.430039	No	1
12.2333	-1.70497	0.00440695	0.858183	507532	5.70546	0.4371	No	1
12.25	-1.74289	0.00450496	0.853673	495748	5.69526	0.446891	No	1
12.2667	-1.78676	0.00461835	0.849064	484223	5.68505	0.455601	No	1
12.2833	-1.81628	0.00469466	0.844373	472952	5.67482	0.461559	No	1
12.3	-1.83849	0.00475205	0.839594	461930	5.66458	0.471763	No	1
12.3167	-1.90173	0.00491553	0.834712	451151	5.65432	0.480525	No	1
12.3333	-1.91264	0.00494373	0.829754	440611	5.64406	0.485338	No	1
12.35	-1.94461	0.00502636	0.824723	430305	5.63378	0.493503	No	1
12.3667	-1.98222	0.00512358	0.819606	420229	5.62349	0.500928	No	1
12.3833	-2.00839	0.00519122	0.814402	410377	5.61318	0.509339	No	1
12.4	-2.05394	0.00530895	0.809101	400745	5.60287	0.518351	No	1
12.4167	-2.08499	0.00538921	0.803719	391328	5.59254	0.52405	No	1
12.4333	-2.10414	0.00543871	0.798265	382123	5.5822	0.531118	No	1
12.45	-2.14618	0.00554736	0.792717	373124	5.57185	0.540961	No	1
12.4667	-2.18761	0.00565444	0.787078	364328	5.56149	0.547521	No	1
12.4833	-2.2034	0.00569527	0.781366	355731	5.55112	0.554078	No	1
12.5	-2.24483	0.00580235	0.775567	347328	5.54074	0.563062	No	1
12.5167	-2.28015	0.00589365	0.769666	339115	5.53035	0.572419	No	1
12.5333	-2.32463	0.00600862	0.763681	331088	5.51994	0.578301	No	1
12.55	-2.33203	0.00602775	0.757648	323244	5.50953	0.580321	No	1
12.5667	-2.34538	0.00606226	0.751568	315579	5.49911	0.586379	No	1
12.5833	-2.38528	0.00616539	0.745412	308088	5.48867	0.593875	No	1
12.6	-2.41023	0.00622988	0.739177	300769	5.47823	0.600218	No	1
12.6167	-2.44083	0.00630896	0.732878	293617	5.46778	0.605167	No	1
12.6333	-2.45448	0.00634426	0.726528	286630	5.45732	0.60901	No	1
12.65	-2.47607	0.00640006	0.720129	279803	5.44685	0.613462	No	1
12.6667	-2.49461	0.00644798	0.71368	273134	5.43638	0.617508	No	1
12.6833	-2.51285	0.00649512	0.707185	266618	5.42589	0.621449	No	1
12.7	-2.53047	0.00654067	0.700646	260253	5.4154	0.624741	No	1
12.7167	-2.54336	0.006574	0.694071	254036	5.4049	0.62763	No	1
12.7333	-2.55763	0.00661087	0.68746	247963	5.39439	0.630567	No	1
12.75	-2.57083	0.00664499	0.680803	242030	5.38387	0.63541	No	1
12.7667	-2.60051	0.0067217	0.674094	236237	5.37335	0.639756	No	1
12.7833	-2.60959	0.00674517	0.667342	230578	5.36282	0.642577	No	1
12.8	-2.62675	0.00678954	0.660552	225051	5.35228	0.646328	No	1
12.8167	-2.64331	0.00683233	0.653717	219654	5.34174	0.650371	No	1
12.8333	-2.66276	0.00688262	0.64684	214383	5.33119	0.653661	No	1
12.85	-2.67306	0.00690924	0.63994	209236	5.32064	0.65375	No	1
12.8667	-2.66627	0.00689169	0.633039	204210	5.31008	0.65337	No	1
12.8833	-2.67261	0.00690806	0.626132	199303	5.29951	0.654389	No	1
12.9	-2.67711	0.00691969	0.619199	194511	5.28894	0.657365	No	1
12.9167	-2.69931	0.00697708	0.612241	189832	5.27837	0.658845	No	1
12.9333	-2.69145	0.00695676	0.605277	185264	5.26779	0.657918	No	1
12.95	-2.69382	0.00696288	0.598306	180805	5.25721	0.659525	No	1
12.9667	-2.70656	0.00699581	0.591317	176451	5.24662	0.661037	No	1
12.9833	-2.70801	0.00699956	0.584319	172201	5.23604	0.660704	No	1
13	-2.70549	0.00699305	0.577329	168052	5.22544	0.65903	No	1
13.0167	-2.6958	0.006968	0.570343	164002	5.21485	0.659832	No	1
13.0333	-2.71342	0.00701356	0.563349	160048	5.20425	0.660038	No	1
13.05	-2.6987	0.0069755	0.556373	156189	5.19365	0.656224	No	1
13.0667	-2.68321	0.00693547	0.549424	152423	5.18305	0.654737	No	1
13.0833	-2.68741	0.00694631	0.542492	148746	5.17245	0.65284	No	1
13.1	-2.66841	0.00689721	0.535581	145158	5.16184	0.650553	No	1
13.1167	-2.66925	0.00689938	0.528693	141656	5.15123	0.648359	No	1
13.1333	-2.65086	0.00685185	0.521832	138239	5.14063	0.645272	No	1
13.15	-2.64422	0.0068347	0.514993	134903	5.13002	0.644324	No	1
13.1667	-2.64323	0.00683213	0.508182	131649	5.11942	0.639991	No	1
13.1833	-2.60867	0.0067428	0.501422	128472	5.10881	0.634616	No	1
13.2	-2.59898	0.00671775	0.4947	125373	5.0982	0.632996	No	1
13.2167	-2.59509	0.0067077	0.487996	122348	5.0876	0.631263	No	1
13.2333	-2.58433	0.00667989	0.481329	119397	5.07699	0.625921	No	1
13.25	-2.55069	0.00659293	0.474712	116517	5.06639	0.622214	No	1
13.2667	-2.55321	0.00659943	0.46813	113707	5.05579	0.619621	No	1
13.2833	-2.52856	0.00653574	0.461588	110965	5.04519	0.614681	No	1
13.3	-2.5117	0.00649215	0.455096	108290	5.03459	0.610426	No	1
13.3167	-2.49255	0.00644266	0.448649	105681	5.024	0.606577	No	1
13.3333	-2.4789	0.00640736	0.442232	103134	5.0134	0.605165	No	1
13.35	-2.47958	0.00640913	0.435827	100650	5.00281	0.604439	No	1
13.3667	-2.47142	0.00638803	0.429455	98226	4.99223	0.5995	No	1
13.3833	-2.43747	0.00630028	0.423143	95862	4.98165	0.593585	No	1
13.4	-2.42122	0.00625827	0.416873	93555	4.97107	0.591749	No	1
13.4167	-2.42053	0.0062565	0.410628	91305	4.96049	0.589628	No	1
13.4333	-2.40184	0.00620818	0.404424	89110	4.94993	0.584349	No	1
13.45	-2.37521	0.00613936	0.398278	86968	4.93936	0.579175	No	1
13.4667	-2.35728	0.00609302	0.392181	84879	4.9288	0.5756	No	1
13.4833	-2.34363	0.00605772	0.386115	82842	4.91825	0.574111	No	1
13.5	-2.34263	0.00605515	0.380073	80854	4.9077	0.571477	No	1
13.5167	-2.31952	0.0059954	0.374072	78915	4.89716	0.567153	No	1
13.5333	-2.30464	0.00595695	0.368106	77024	4.88663	0.565329	No	1
13.55	-2.30182	0.00594965	0.362166	75179	4.8761	0.562956	No	1
13.5667	-2.28236	0.00589937	0.356265	73379	4.86557	0.558738	No	1
13.5833	-2.26443	0.00585302	0.350426	71624	4.85506	0.55194	No	1
13.6	-2.22392	0.00574831	0.344651	69912	4.84455	0.547344	No	1
13.6167	-2.22384	0.00574811	0.33892	68242	4.83405	0.544202	No	1
13.6333	-2.19508	0.00567377	0.333239	66613	4.82356	0.538794	No	1
13.65	-2.17654	0.00562585	0.327609	65025	4.81308	0.53533	No	1
13.6667	-2.1635	0.00559212	0.322016	63475	4.8026	0.532553	No	1
13.6833	-2.15045	0.0055584	0.31646	61964	4.79214	0.529199	No	1
13.7	-2.13267	0.00551245	0.310957	60489	4.78168	0.523343	No	1
13.7167	-2.09933	0.00542628	0.305523	59052	4.77123	0.516943	No	1
13.7333	-2.07713	0.00536889	0.300145	57649	4.76079	0.51353	No	1
13.75	-2.0679	0.00534503	0.294812	56282	4.75037	0.509195	No	1
13.7667	-2.03822	0.00526832	0.289535	54948	4.73995	0.503804	No	1
13.7833	-2.02044	0.00522237	0.284319	53646	4.72954	0.498585	No	1
13.8	-1.99214	0.00514921	0.279167	52377	4.71914	0.492437	No	1
13.8167	-1.96689	0.00508393	0.274079	51140	4.70876	0.487295	No	1
13.8333	-1.94667	0.00503168	0.269053	49932	4.69838	0.48162	No	1
13.85	-1.91714	0.00495536	0.26409	48755	4.68802	0.476191	No	1
13.8667	-1.89891	0.00490823	0.259192	47606	4.67766	0.470056	No	1
13.8833	-1.86374	0.00481732	0.254364	46486	4.66732	0.46363	No	1
13.9	-1.84321	0.00476427	0.249605	45394	4.657	0.457983	No	1
13.9167	-1.8143	0.00468953	0.2449	44328	4.64668	0.454188	No	1
13.9333	-1.80858	0.00467474	0.240238	43289	4.63638	0.45068	No	1
13.95	-1.78195	0.00460592	0.235628	42275	4.62608	0.445198	No	1
13.9667	-1.76051	0.0045505	0.231078	41286	4.6158	0.440076	No	1
13.9833	-1.73678	0.00448917	0.226599	40322	4.60554	0.4327	No	1
14	-1.69749	0.00438761	0.222203	39381	4.59529	0.424756	No	1
14.0167	-1.66934	0.00431485	0.217887	38464	4.58505	0.418379	No	1
14.0333	-1.64256	0.00424563	0.213637	37569	4.57483	0.4129	No	1
14.05	-1.62158	0.0041914	0.209433	36696	4.56462	0.410429	No	1
14.0667	-1.6186	0.00418371	0.205268	35844	4.55442	0.406545	No	1
14.0833	-1.58648	0.00410069	0.201156	35013	4.54423	0.401146	No	1
14.1	-1.57161	0.00406223	0.197095	34203	4.53406	0.397388	No	1
14.1167	-1.55246	0.00401273	0.193073	33413	4.52392	0.394889	No	1
14.1333	-1.5475	0.00399991	0.189089	32642	4.51378	0.390929	No	1
14.15	-1.5169	0.00392084	0.185179	31889	4.50364	0.381407	No	1
14.1667	-1.46846	0.00379561	0.181366	31156	4.49354	0.373074	No	1
14.1833	-1.44732	0.00374099	0.177628	30440	4.48344	0.367477	No	1
14.2	-1.42039	0.00367138	0.173944	29742	4.47337	0.363573	No	1
14.2167	-1.41253	0.00365106	0.170307	29060	4.4633	0.359072	No	1
14.2333	-1.38102	0.00356962	0.166736	28396	4.45326	0.351715	No	1
14.25	-1.35104	0.00349212	0.163236	27747	4.44322	0.346089	No	1
14.2667	-1.33311	0.00344578	0.159801	27115	4.43321	0.339799	No	1
14.2833	-1.29809	0.00335526	0.156427	26497	4.4232	0.334914	No	1
14.3	-1.29115	0.00333732	0.153096	25895	4.41322	0.332211	No	1
14.3167	-1.27307	0.00329058	0.149815	25307	4.40324	0.326157	No	1
14.3333	-1.24034	0.00320598	0.146596	24734	4.39329	0.320581	No	1
14.35	-1.22607	0.0031691	0.143434	24175	4.38337	0.315924	No	1
14.3667	-1.20051	0.00310304	0.140328	23629	4.37345	0.310338	No	1
14.3833	-1.17923	0.00304802	0.137277	23096	4.36354	0.305692	No	1
14.4	-1.16099	0.00300089	0.134283	22576	4.35365	0.300095	No	1
14.4167	-1.13253	0.00292733	0.131341	22069	4.34378	0.296001	No	1
14.4333	-1.1259	0.00291018	0.128435	21574	4.33393	0.293917	No	1
14.45	-1.11285	0.00287645	0.125569	21091	4.3241	0.288678	No	1
14.4667	-1.08226	0.00279738	0.122763	20619	4.31427	0.282858	No	1
14.4833	-1.06494	0.00275261	0.120004	20159	4.30447	0.27992	No	1
14.5	-1.05632	0.00273033	0.117282	19710	4.29469	0.276265	No	1
14.5167	-1.03366	0.00267176	0.114619	19271	4.2849	0.269023	No	1
14.5333	-0.998028	0.00257967	0.112032	18843	4.27515	0.261371	No	1
14.55	-0.972469	0.0025136	0.109512	18425	4.26541	0.256287	No	1
14.5667	-0.956371	0.00247199	0.107046	18018	4.25571	0.251268	No	1
14.5833	-0.931423	0.00240751	0.104626	17620	4.24601	0.247491	No	1
14.6	-0.924785	0.00239035	0.102247	17231	4.23631	0.243742	No	1
14.6167	-0.900142	0.00232666	0.09991	16852	4.22665	0.239612	No	1
14.6333	-0.890758	0.0023024	0.0976146	16481	4.21698	0.235998	No	1
14.65	-0.870083	0.00224896	0.0953733	16120	4.20737	0.229195	No	1
14.6667	-0.837047	0.00216357	0.0931913	15766	4.19772	0.22448	No	1
14.6833	-0.832088	0.00215075	0.0910439	15422	4.18814	0.22277	No	1
14.7	-0.821483	0.00212334	0.0889249	15085	4.17855	0.219323	No	1
14.7167	-0.803707	0.00207739	0.0868421	14756	4.16897	0.215965	No	1
14.7333	-0.793865	0.00205195	0.0848036	14435	4.15942	0.210796	No	1
14.75	-0.762813	0.00197169	0.0828247	14122	4.1499	0.204179	No	1
14.7667	-0.742443	0.00191904	0.0808915	13815	4.14035	0.201911	No	1
14.7833	-0.743587	0.001922	0.0789713	13516	4.13085	0.202126	No	1
14.8	-0.741527	0.00191667	0.0770657	13224	4.12136	0.19951	No	1
14.8167	-0.721919	0.00186599	0.0751994	12939	4.1119	0.194507	No	1
14.8333	-0.702464	0.0018157	0.0733743	12660	4.10243	0.191446	No	1
14.85	-0.6972	0.0018021	0.0715845	12388	4.093	0.18764	No	1
14.8667	-0.672405	0.00173801	0.0698413	12122	4.08357	0.182206	No	1
14.8833	-0.655391	0.00169403	0.0681439	11862	4.07416	0.178493	No	1
14.9	-0.64326	0.00166268	0.0664821	11608	4.06476	0.175184	No	1
14.9167	-0.629298	0.00162659	0.0648419	11360	4.05538	0.17447	No	1
14.9333	-0.636089	0.00164414	0.0632056	11118	4.04603	0.174887	No	1
14.95	-0.630367	0.00162935	0.061585	10881	4.03667	0.171652	No	1
14.9667	-0.610759	0.00157867	0.0600123	10649	4.02731	0.165168	No	1
14.9833	-0.581691	0.00150353	0.0584979	10423	4.01799	0.159635	No	1
15	-0.569102	0.001471	0.0570213	10202	4.00869	0.157537	No	1
15.0167	-0.564906	0.00146015	0.0555457	9986	3.99939	0.159864	No	1
15.0333	-0.584209	0.00151004	0.0540491	9775	3.99012	0.162535	No	1
15.05	-0.582454	0.00150551	0.0525574	9568	3.98082	0.159247	No	1
15.0667	-0.559032	0.00144496	0.0511265	9366	3.97155	0.149828	No	1
15.0833	-0.513484	0.00132723	0.0497664	9169	3.96232	0.14437	No	1
15.1	-0.518596	0.00134045	0.0484234	8976	3.95308	0.146501	No	1
15.1167	-0.527369	0.00136313	0.047084	8788	3.94389	0.143947	No	1
15.1333	-0.499064	0.00128996	0.0457897	8603	3.93465	0.137096	No	1
15.15	-0.477321	0.00123376	0.0445591	8423	3.92547	0.130417	No	1
15.1667	-0.450389	0.00116415	0.0433794	8246	3.91624	0.126337	No	1
15.1833	-0.447261	0.00115606	0.0422213	8074	3.90709	0.126005	No	1
15.2	-0.447032	0.00115547	0.0410797	7905	3.8979	0.12302	No	1
15.2167	-0.425135	0.00109887	0.0399687	7740	3.88874	0.119571	No	1
15.2333	-0.421702	0.00109	0.0388859	7579	3.87961	0.117124	No	1
15.25	-0.406977	0.00105194	0.0378293	7421	3.87046	0.114062	No	1
15.2667	-0.399272	0.00103202	0.0367972	7267	3.86136	0.111961	No	1
15.2833	-0.391413	0.00101171	0.0357845	7116	3.85224	0.110025	No	1
15.3	-0.384928	0.000994949	0.0347917	6968	3.84311	0.107755	No	1
15.3167	-0.374781	0.000968721	0.0338325	6823	3.83398	0.102835	No	1
15.3333	-0.34968	0.000903841	0.0329127	6682	3.82491	0.0992666	No	1
15.35	-0.349146	0.000902461	0.0320046	6543	3.81578	0.100395	No	1
15.3667	-0.357157	0.000923167	0.0311004	6408	3.80672	0.0985247	No	1
15.3833	-0.335566	0.000867359	0.0302281	6275	3.79761	0.0934981	No	1
15.4	-0.321452	0.000830877	0.029388	6145	3.78852	0.0915459	No	1
15.4167	-0.321528	0.000831074	0.0285623	6018	3.77945	0.0903907	No	1
15.4333	-0.313059	0.000809184	0.0277554	5894	3.77041	0.0874898	No	1
15.45	-0.300928	0.000777829	0.0269712	5772	3.76133	0.0854297	No	1
15.4667	-0.298411	0.000771321	0.026205	5653	3.75228	0.0835808	No	1
15.4833	-0.287806	0.00074391	0.0254519	5536	3.7432	0.082596	No	1
15.5	-0.291392	0.000753179	0.0246996	5422	3.73416	0.0834118	No	1
15.5167	-0.293452	0.000758503	0.0239376	5310	3.72509	0.0847446	No	1
15.5333	-0.300699	0.000777237	0.0231829	5200	3.716	0.0818059	No	1
15.55	-0.272852	0.000705258	0.0224635	5093	3.70697	0.0769686	No	1
15.5667	-0.266825	0.000689679	0.0217716	4987	3.69784	0.0756952	No	1
15.5833	-0.264002	0.000682383	0.0210978	4884	3.68878	0.0729594	No	1
15.6	-0.247751	0.000640379	0.0204436	4783	3.6797	0.0713504	No	1
15.6167	-0.252863	0.000653591	0.019802	4685	3.67071	0.0701066	No	1
15.6333	-0.239206	0.000618292	0.0191769	4588	3.66162	0.0676634	No	1
15.65	-0.235926	0.000609812	0.0185736	4493	3.65254	0.0652606	No	1
15.6667	-0.222574	0.000575302	0.0179938	4400	3.64345	0.0623778	No	1
15.6833	-0.215937	0.000558145	0.017433	4309	3.63438	0.0610336	No	1
15.7	-0.213419	0.000551638	0.0168705	4219	3.62521	0.0626341	No	1
15.7167	-0.227533	0.00058812	0.0162923	4132	3.61616	0.0643998	No	1
15.7333	-0.226236	0.000584767	0.0157183	4046	3.60703	0.0615919	No	1
15.75	-0.208155	0.00053803	0.0151616	3962	3.59791	0.0604698	No	1
15.7667	-0.218759	0.000565441	0.0146109	3880	3.58883	0.0601652	No	1
15.7833	-0.206476	0.000533692	0.0140724	3799	3.57967	0.0576564	No	1
15.8	-0.201517	0.000520874	0.0135523	3719	3.57043	0.0559883	No	1
15.8167	-0.195185	0.000504506	0.01305	3642	3.56134	0.0536314	No	1
15.8333	-0.185343	0.000479067	0.012579	3566	3.55218	0.0490213	No	1
15.85	-0.162988	0.000421287	0.0121383	3491	3.54295	0.0468646	No	1
15.8667	-0.170541	0.000440809	0.0116995	3418	3.53377	0.0484562	No	1
15.8833	-0.17489	0.00045205	0.0112524	3346	3.52453	0.0484991	No	1
15.9	-0.171457	0.000443176	0.0108091	3276	3.51534	0.0474705	No	1
15.9167	-0.168176	0.000434696	0.0103734	3206	3.50596	0.0466539	No	1
15.9333	-0.166269	0.000429766	0.00995023	3139	3.49679	0.0446037	No	1
15.95	-0.154138	0.000398411	0.00954674	3072	3.48742	0.0422183	No	1
15.9667	-0.149789	0.00038717	0.00915735	3007	3.47813	0.0413827	No	1
15.9833	-0.148798	0.000384606	0.00876914	2943	3.46879	0.0417701	No	1
16	-0.153299	0.000396241	0.00837176	2880	3.45939	0.0431403	No	1
16.0167	-0.159479	0.000412215	0.00797773	2819	3.4501	0.0408462	No	1
16.0333	-0.13743	0.000355223	0.00760846	2758	3.44059	0.0376593	No	1
16.05	-0.137048	0.000354237	0.00726482	2699	3.4312	0.0351954	No	1
16.0667	-0.120187	0.000310655	0.0069348	2641	3.42177	0.0345732	No	1
16.0833	-0.133233	0.000344377	0.00659796	2584	3.41229	0.0364204	No	1
16.1	-0.13453	0.000347729	0.00626301	2528	3.40278	0.0339693	No	1
16.1167	-0.115991	0.000299809	0.00595714	2473	3.39322	0.0301065	No	1
16.1333	-0.106759	0.000275948	0.00566528	2419	3.38364	0.0308285	No	1
16.15	-0.122094	0.000315585	0.00537007	2366	3.37401	0.0305996	No	1
16.1667	-0.105844	0.000273581	0.00508491	2314	3.36436	0.0285315	No	1
16.1833	-0.107446	0.000277722	0.00480971	2263	3.35468	0.0283254	No	1
16.2	-0.105081	0.000271609	0.00454241	2213	3.34498	0.026699	No	1
16.2167	-0.0960018	0.000248142	0.00428506	2164	3.33526	0.0260705	No	1
16.2333	-0.101113	0.000261354	0.004029	2116	3.32552	0.0262275	No	1
16.25	-0.0979854	0.000253269	0.00377767	2068	3.31555	0.0248986	No	1
16.2667	-0.0918055	0.000237296	0.00353255	2022	3.30578	0.0247535	No	1
16.2833	-0.0976801	0.00025248	0.00329236	1976	3.29579	0.0236934	No	1
16.3	-0.0844813	0.000218364	0.00307002	1931	3.28578	0.02096	No	1
16.3167	-0.0773859	0.000200024	0.00286543	1887	3.27577	0.0199399	No	1
16.3333	-0.0773096	0.000199827	0.00268254	1844	3.26576	0.0164598	No	1
16.35	-0.0509881	0.000131792	0.00253052	1802	3.25575	0.0136533	No	1
16.3667	-0.0559472	0.00014461	0.00239318	1760	3.24551	0.0134118	No	1
16.3833	-0.0496148	0.000128243	0.00226542	1719	3.23528	0.011647	No	1
16.4	-0.0425194	0.000109903	0.00215737	1679	3.22505	0.00943781	No	1
16.4167	-0.0325249	8.40692e-05	0.00205455	1640	3.21484	0.0105145	No	1
16.4333	-0.0515221	0.000133172	0.00194454	1601	3.20439	0.0107238	No	1
16.45	-0.0346611	8.95907e-05	0.00184251	1563	3.19396	0.0088712	No	1
16.4667	-0.0370262	9.57039e-05	0.0017467	1526	3.18355	0.00942242	No	1
16.4833	-0.0395438	0.000102212	0.00164713	1489	3.17289	0.00948064	No	1
16.5	-0.0379417	9.80702e-05	0.00153169	1453	3.16227	0.0123024	No	1
16.5167	-0.0631949	0.000163344	0.00137888	1418	3.15168	0.0163624	No	1
16.5333	-0.0721213	0.000186416	0.00121167	1384	3.14114	0.014833	No	1
16.55	-0.051293	0.00013258	0.00107374	1350	3.13033	0.0107501	No	1
16.5667	-0.0387045	0.000100042	0.000962939	1316	3.11926	0.0096684	No	1
16.5833	-0.042748	0.000110494	0.000856671	1284	3.10857	0.00978669	No	1
16.6	-0.0402303	0.000103986	0.000743697	1252	3.0976	0.0107602	No	1
16.6167	-0.0515981	0.000133369	0.000624214	1220	3.08636	0.0108313	No	1
16.6333	-0.041451	0.000107141	0.00051055	1189	3.07518	0.00957661	No	1
16.65	-0.0413747	0.000106944	0.000400437	1159	3.06408	0.0100546	No	1
16.6667	-0.0461811	0.000119367	0.000287069	1129	3.05269	0.0100198	No	1
16.6833	-0.0416798	0.000107732	0.000170545	1100	3.04139	0.0104677	No	1
16.7	-0.0507587	0.000131199	5.54019e-05	1071	3.02979	0.00963822	No	1
