# Supplementary material for: Descriptive study and evaluation of shrink hoods with recycled content for regulatory compliance
Source: Research Square preprint supplement (doi:10.21203/rs.3.rs-6261320/v1), 2025-06-25
Supplement: Supplementary file 3 [file 9811dbc49ace5e0c3a1f99aa.xlsx]

## Sheet: Sample Details
Administrative Information
Export date	10 December 2024 09:42:15
Culture name	en-GB
Decimal separator	.
Workspace name	November 2024
Workspace path	C:\ProgramData\Agilent Technologies\GPC\Workspaces\2024\November 2024\
File name	ICF_04_12_2024-0003.sample
Creation date	05 December 2024 10:03:58
Created by	OBPC
Comments	Collected by Agilent GPC/SEC Software Version 2.1.9.34851
Software version	Agilent SEC Software - 2.1.9.34851
Sample Information
Sample name	C
Information
Sample type	Sample
Injection date	05 December 2024
Vial number	None
Injection number	1
Injection volume (µL)	200
Concentration (mg/mL)	1
dn/dc (mL/g)	0.1
UV extinction coefficient [(mg/mL)-¹][cm-¹]	1
Mp (g/mol)	100000
IV (dL/g)	0.5
Mark-Houwink K ((10e-5) dL/g)	14.1
Mark-Houwink Alpha	0.7
Analysed	Yes
Sample Instrument Conditions
Eluent
Eluent refractive index	1
Set flow rate (mL/min)	1
LS wavelength (nm)	650
Laser power (%)	0
Set detector temperature (°C)	0
Actual detector temperature (°C)	0
Actual flow rate (mL/min)	0
Column information
Data origin	Collected by Agilent GPC/SEC Software Version 2.1.9.34851
Instrument name	Agilent DataStream
Sample Collection Parameters
Collected by	OBPC
Number of channels	1
Run length (mins)	30.0167
Delay time (secs)	0
Sampling interval (secs)	1
Number of data points	1801
Sample DLS Parameters
Eluent refractive index	1
Eluent viscosity (P)	0.0089
DLS correlator run time (secs)	5
DLS Clip Time (µs)	100
DLS R²	0.4
Sample Channel Information
Channel ID	Detector type	Detector name	Detector units	Channel Information
1	RI	Trace0	mV

## Sheet: Raw Data
Sample Collection Parameters
Collected by	OBPC
Number of channels	1
Run length (mins)	30.0167
Delay time (secs)	0
Sampling interval (secs)	1
Number of data points	1801
Sample DLS Parameters
Eluent refractive index	1
Eluent viscosity (P)	0.0089
DLS correlator run time (secs)	5
DLS Clip Time (µs)	100
DLS R²	0.4
Sample Channel Information
Channel ID	Detector type	Detector name	Detector units	Channel Information
1	RI	Trace0	mV
Raw Data
RT (mins)	Response Trace 1
0	3.47836
0.0166667	3.48732
0.0333333	3.48763
0.05	3.49052
0.0666667	3.47466
0.0833333	3.48183
0.1	3.51204
0.116667	3.49693
0.133333	3.49754
0.15	3.48717
0.166667	3.49617
0.183333	3.52043
0.2	3.50151
0.216667	3.4951
0.233333	3.49113
0.25	3.48091
0.266667	3.48732
0.283333	3.47252
0.3	3.47527
0.316667	3.47221
0.333333	3.49617
0.35	3.50319
0.366667	3.48961
0.383333	3.49266
0.4	3.50334
0.416667	3.50731
0.433333	3.50151
0.45	3.48763
0.466667	3.49144
0.483333	3.48183
0.5	3.50578
0.516667	3.50594
0.533333	3.50807
0.55	3.49113
0.566667	3.49815
0.583333	3.49281
0.6	3.48991
0.616667	3.48839
0.633333	3.46291
0.65	3.43498
0.666667	3.43117
0.683333	3.43361
0.7	3.42583
0.716667	3.42445
0.733333	3.42415
0.75	3.40675
0.766667	3.41667
0.783333	3.43315
0.8	3.43025
0.816667	3.42751
0.833333	3.43514
0.85	3.43605
0.866667	3.43315
0.883333	3.424
0.9	3.4446
0.916667	3.43315
0.933333	3.43544
0.95	3.43254
0.966667	3.44109
0.983333	3.44109
1	3.43758
1.01667	3.42659
1.03333	3.42659
1.05	3.43025
1.06667	3.41469
1.08333	3.42018
1.1	3.41881
1.11667	3.41774
1.13333	3.40935
1.15	3.41682
1.16667	3.42644
1.18333	3.42491
1.2	3.42873
1.21667	3.43956
1.23333	3.43834
1.25	3.42461
1.26667	3.42674
1.28333	3.42094
1.3	3.4092
1.31667	3.40828
1.33333	3.42064
1.35	3.42049
1.36667	3.41133
1.38333	3.41057
1.4	3.41957
1.41667	3.41057
1.43333	3.42018
1.45	3.39867
1.46667	3.39272
1.48333	3.39516
1.5	3.39592
1.51667	3.37807
1.53333	3.3831
1.55	3.38356
1.56667	3.40096
1.58333	3.37639
1.6	3.38646
1.61667	3.39729
1.63333	3.39302
1.65	3.38799
1.66667	3.37822
1.68333	3.36754
1.7	3.37181
1.71667	3.3622
1.73333	3.35808
1.75	3.36327
1.76667	3.36967
1.78333	3.36922
1.8	3.37303
1.81667	3.36205
1.83333	3.37776
1.85	3.37761
1.86667	3.36342
1.88333	3.368
1.9	3.36601
1.91667	3.37624
1.93333	3.37441
1.95	3.37837
1.96667	3.37135
1.98333	3.38631
2	3.39317
2.01667	3.3886
2.03333	3.386
2.05	3.38051
2.06667	3.37212
2.08333	3.36403
2.1	3.35991
2.11667	3.36296
2.13333	3.38448
2.15	3.38097
2.16667	3.37669
2.18333	3.37929
2.2	3.37151
2.21667	3.35518
2.23333	3.35243
2.25	3.35838
2.26667	3.33443
2.28333	3.33427
2.3	3.32481
2.31667	3.33122
2.33333	3.34404
2.35	3.36556
2.36667	3.36052
2.38333	3.34496
2.4	3.34267
2.41667	3.34724
2.43333	3.3532
2.45	3.34938
2.46667	3.35304
2.48333	3.35991
2.5	3.35167
2.51667	3.35289
2.53333	3.36067
2.55	3.36311
2.56667	3.34877
2.58333	3.35899
2.6	3.36494
2.61667	3.35732
2.63333	3.35701
2.65	3.37242
2.66667	3.3596
2.68333	3.35579
2.7	3.36769
2.71667	3.36861
2.73333	3.36861
2.75	3.36311
2.76667	3.35686
2.78333	3.35854
2.8	3.36174
2.81667	3.35228
2.83333	3.34785
2.85	3.34831
2.86667	3.35762
2.88333	3.34694
2.9	3.34389
2.91667	3.339
2.93333	3.34251
2.95	3.34206
2.96667	3.33977
2.98333	3.34221
3	3.34618
3.01667	3.35396
3.03333	3.3474
3.05	3.35503
3.06667	3.34099
3.08333	3.3326
3.1	3.3297
3.11667	3.33168
3.13333	3.33015
3.15	3.32253
3.16667	3.33214
3.18333	3.34206
3.2	3.35106
3.21667	3.3445
3.23333	3.32817
3.25	3.34175
3.26667	3.34923
3.28333	3.3416
3.3	3.33702
3.31667	3.33244
3.33333	3.33794
3.35	3.33534
3.36667	3.34282
3.38333	3.3503
3.4	3.33138
3.41667	3.339
3.43333	3.34892
3.45	3.35228
3.46667	3.35228
3.48333	3.35045
3.5	3.36144
3.51667	3.35381
3.53333	3.34663
3.55	3.34038
3.56667	3.33855
3.58333	3.33778
3.6	3.33687
3.61667	3.33885
3.63333	3.34953
3.65	3.35503
3.66667	3.33458
3.68333	3.32573
3.7	3.33702
3.71667	3.34068
3.73333	3.32573
3.75	3.31779
3.76667	3.32344
3.78333	3.32008
3.8	3.32665
3.81667	3.30986
3.83333	3.31535
3.85	3.31764
3.86667	3.29094
3.88333	3.29613
3.9	3.30772
3.91667	3.31749
3.93333	3.31306
3.95	3.31932
3.96667	3.33336
3.98333	3.32985
4	3.32695
4.01667	3.34267
4.03333	3.33199
4.05	3.31688
4.06667	3.31764
4.08333	3.31337
4.1	3.32802
4.11667	3.35335
4.13333	3.34206
4.15	3.33443
4.16667	3.32329
4.18333	3.3181
4.2	3.30849
4.21667	3.30055
4.23333	3.32237
4.25	3.31261
4.26667	3.30223
4.28333	3.31596
4.3	3.32298
4.31667	3.32726
4.33333	3.31627
4.35	3.32527
4.36667	3.33702
4.38333	3.34404
4.4	3.33458
4.41667	3.3326
4.43333	3.33931
4.45	3.3416
4.46667	3.33366
4.48333	3.3355
4.5	3.3445
4.51667	3.34984
4.53333	3.33992
4.55	3.34358
4.56667	3.34221
4.58333	3.3445
4.6	3.35457
4.61667	3.34496
4.63333	3.34404
4.65	3.34099
4.66667	3.33763
4.68333	3.33778
4.7	3.32787
4.71667	3.33397
4.73333	3.33321
4.75	3.32298
4.76667	3.34114
4.78333	3.3477
4.8	3.34328
4.81667	3.33473
4.83333	3.31703
4.85	3.33092
4.86667	3.34801
4.88333	3.33031
4.9	3.31352
4.91667	3.31184
4.93333	3.31779
4.95	3.31215
4.96667	3.33061
4.98333	3.32237
5	3.32344
5.01667	3.33488
5.03333	3.33717
5.05	3.32527
5.06667	3.32893
5.08333	3.33885
5.1	3.32451
5.11667	3.31795
5.13333	3.32054
5.15	3.31474
5.16667	3.30483
5.18333	3.32542
5.2	3.32497
5.21667	3.32024
5.23333	3.31963
5.25	3.31779
5.26667	3.30956
5.28333	3.30483
5.3	3.28728
5.31667	3.29689
5.33333	3.29964
5.35	3.28896
5.36667	3.2917
5.38333	3.29048
5.4	3.30162
5.41667	3.29994
5.43333	3.29643
5.45	3.29796
5.46667	3.30467
5.48333	3.31627
5.5	3.29918
5.51667	3.29201
5.53333	3.29704
5.55	3.2914
5.56667	3.28362
5.58333	3.29994
5.6	3.2917
5.61667	3.28392
5.63333	3.28285
5.65	3.29811
5.66667	3.29369
5.68333	3.29826
5.7	3.30208
5.71667	3.30727
5.73333	3.30315
5.75	3.29018
5.76667	3.27431
5.78333	3.27934
5.8	3.28712
5.81667	3.27858
5.83333	3.28331
5.85	3.29857
5.86667	3.29323
5.88333	3.29842
5.9	3.30467
5.91667	3.29872
5.93333	3.29521
5.95	3.29933
5.96667	3.30177
5.98333	3.31474
6	3.3239
6.01667	3.321
6.03333	3.29491
6.05	3.28865
6.06667	3.29994
6.08333	3.28438
6.1	3.28392
6.11667	3.28056
6.13333	3.28621
6.15	3.28148
6.16667	3.283
6.18333	3.27248
6.2	3.28209
6.21667	3.28667
6.23333	3.2888
6.25	3.2711
6.26667	3.27431
6.28333	3.27705
6.3	3.28209
6.31667	3.26088
6.33333	3.27065
6.35	3.27187
6.36667	3.28117
6.38333	3.26424
6.4	3.274
6.41667	3.30055
6.43333	3.283
6.45	3.27782
6.46667	3.26164
6.48333	3.26912
6.5	3.27827
6.51667	3.28392
6.53333	3.27827
6.55	3.26607
6.56667	3.27202
6.58333	3.27812
6.6	3.27217
6.61667	3.28789
6.63333	3.28148
6.65	3.29796
6.66667	3.27751
6.68333	3.27675
6.7	3.27507
6.71667	3.26134
6.73333	3.26805
6.75	3.27202
6.76667	3.26393
6.78333	3.26012
6.8	3.25707
6.81667	3.26576
6.83333	3.24913
6.85	3.26302
6.86667	3.26775
6.88333	3.27034
6.9	3.26546
6.91667	3.25676
6.93333	3.26225
6.95	3.25233
6.96667	3.26286
6.98333	3.2766
7	3.27889
7.01667	3.28163
7.03333	3.26286
7.05	3.26042
7.06667	3.2679
7.08333	3.27583
7.1	3.27202
7.11667	3.27538
7.13333	3.26378
7.15	3.25127
7.16667	3.26057
7.18333	3.25768
7.2	3.24562
7.21667	3.26088
7.23333	3.24562
7.25	3.2476
7.26667	3.24318
7.28333	3.23006
7.3	3.24318
7.31667	3.22746
7.33333	3.23692
7.35	3.2502
7.36667	3.25142
7.38333	3.26027
7.4	3.24867
7.41667	3.25417
7.43333	3.23738
7.45	3.24852
7.46667	3.25157
7.48333	3.24379
7.5	3.26027
7.51667	3.26302
7.53333	3.25676
7.55	3.26592
7.56667	3.26546
7.58333	3.25554
7.6	3.26317
7.61667	3.26088
7.63333	3.22853
7.65	3.24013
7.66667	3.23311
7.68333	3.23097
7.7	3.22029
7.71667	3.20885
7.73333	3.21571
7.75	3.21739
7.76667	3.21785
7.78333	3.20442
7.8	3.20396
7.81667	3.21144
7.83333	3.22472
7.85	3.21541
7.86667	3.20213
7.88333	3.20381
7.9	3.22151
7.91667	3.22075
7.93333	3.20793
7.95	3.21342
7.96667	3.22243
7.98333	3.23448
8	3.21373
8.01667	3.20076
8.03333	3.218
8.05	3.20107
8.06667	3.23219
8.08333	3.22319
8.1	3.24211
8.11667	3.24318
8.13333	3.22594
8.15	3.22609
8.16667	3.21877
8.18333	3.23174
8.2	3.23875
8.21667	3.24837
8.23333	3.22594
8.25	3.22578
8.26667	3.23509
8.28333	3.23235
8.3	3.22289
8.31667	3.22411
8.33333	3.23021
8.35	3.21831
8.36667	3.21434
8.38333	3.20244
8.4	3.21083
8.41667	3.21373
8.43333	3.21709
8.45	3.21861
8.46667	3.22182
8.48333	3.20778
8.5	3.22838
8.51667	3.21938
8.53333	3.23387
8.55	3.23036
8.56667	3.21999
8.58333	3.21419
8.6	3.20503
8.61667	3.2357
8.63333	3.22502
8.65	3.21388
8.66667	3.21587
8.68333	3.21358
8.7	3.218
8.71667	3.20686
8.73333	3.22762
8.75	3.22884
8.76667	3.22578
8.78333	3.20946
8.8	3.21007
8.81667	3.21938
8.83333	3.21373
8.85	3.22014
8.86667	3.22716
8.88333	3.22151
8.9	3.23235
8.91667	3.2299
8.93333	3.22701
8.95	3.21556
8.96667	3.22075
8.98333	3.23311
9	3.22075
9.01667	3.19145
9.03333	3.2119
9.05	3.21205
9.06667	3.19359
9.08333	3.18581
9.1	3.20366
9.11667	3.21373
9.13333	3.19481
9.15	3.20015
9.16667	3.18153
9.18333	3.1916
9.2	3.17406
9.21667	3.19237
9.23333	3.1884
9.25	3.20137
9.26667	3.20732
9.28333	3.2061
9.3	3.19572
9.31667	3.20473
9.33333	3.20885
9.35	3.20778
9.36667	3.18504
9.38333	3.18337
9.4	3.18748
9.41667	3.19847
9.43333	3.17711
9.45	3.17711
9.46667	3.18733
9.48333	3.19557
9.5	3.19664
9.51667	3.17986
9.53333	3.18077
9.55	3.1971
9.56667	3.1881
9.58333	3.18977
9.6	3.18764
9.61667	3.19054
9.63333	3.18321
9.65	3.18565
9.66667	3.17879
9.68333	3.16307
9.7	3.15605
9.71667	3.1501
9.73333	3.16978
9.75	3.16933
9.76667	3.16551
9.78333	3.17207
9.8	3.17375
9.81667	3.17635
9.83333	3.1736
9.85	3.16368
9.86667	3.16521
9.88333	3.15453
9.9	3.16689
9.91667	3.19191
9.93333	3.19283
9.95	3.18413
9.96667	3.16154
9.98333	3.17497
10	3.18626
10.0167	3.17696
10.0333	3.17558
10.05	3.1768
10.0667	3.17802
10.0833	3.17314
10.1	3.1823
10.1167	3.18306
10.1333	3.17818
10.15	3.18382
10.1667	3.15804
10.1833	3.153
10.2	3.16826
10.2167	3.17635
10.2333	3.17238
10.25	3.16917
10.2667	3.16872
10.2833	3.16689
10.3	3.16338
10.3167	3.16734
10.3333	3.16887
10.35	3.16902
10.3667	3.16185
10.3833	3.16277
10.4	3.16261
10.4167	3.16414
10.4333	3.16643
10.45	3.16444
10.4667	3.16154
10.4833	3.15727
10.5	3.16719
10.5167	3.17818
10.5333	3.17131
10.55	3.16353
10.5667	3.16429
10.5833	3.15712
10.6	3.13622
10.6167	3.12859
10.6333	3.1382
10.65	3.13896
10.6667	3.13728
10.6833	3.13423
10.7	3.1414
10.7167	3.1266
10.7333	3.11409
10.75	3.13332
10.7667	3.12279
10.7833	3.11699
10.8	3.12431
10.8167	3.10905
10.8333	3.10127
10.85	3.088
10.8667	3.08723
10.8833	3.07793
10.9	3.06923
10.9167	3.06191
10.9333	3.04817
10.95	3.06541
10.9667	3.05824
10.9833	3.05656
11	3.04878
11.0167	3.03093
11.0333	3.03535
11.05	3.01445
11.0667	3.0027
11.0833	3.0146
11.1	3.00804
11.1167	3.00285
11.1333	3.0056
11.15	2.99522
11.1667	2.97035
11.1833	2.96455
11.2	2.97997
11.2167	2.96867
11.2333	2.95845
11.25	2.93663
11.2667	2.9171
11.2833	2.89619
11.3	2.87895
11.3167	2.8698
11.3333	2.87102
11.35	2.85378
11.3667	2.83943
11.3833	2.81929
11.4	2.80663
11.4167	2.80037
11.4333	2.76802
11.45	2.74467
11.4667	2.72377
11.4833	2.70332
11.5	2.68669
11.5167	2.65678
11.5333	2.63893
11.55	2.6107
11.5667	2.60078
11.5833	2.56508
11.6	2.54677
11.6167	2.51396
11.6333	2.49229
11.65	2.46437
11.6667	2.43736
11.6833	2.41295
11.7	2.38548
11.7167	2.3333
11.7333	2.30782
11.75	2.25853
11.7667	2.24297
11.7833	2.22298
11.8	2.17903
11.8167	2.13707
11.8333	2.11555
11.85	2.08778
11.8667	2.04933
11.8833	2.02538
11.9	1.98662
11.9167	1.9561
11.9333	1.9265
11.95	1.89156
11.9667	1.83571
11.9833	1.78871
12	1.75652
12.0167	1.72005
12.0333	1.69579
12.05	1.62529
12.0667	1.58882
12.0833	1.53496
12.1	1.49773
12.1167	1.45027
12.1333	1.39519
12.15	1.35368
12.1667	1.32133
12.1833	1.25938
12.2	1.22688
12.2167	1.17516
12.2333	1.14265
12.25	1.10161
12.2667	1.06636
12.2833	1.01646
12.3	0.969772
12.3167	0.925522
12.3333	0.864487
12.35	0.831375
12.3667	0.784988
12.3833	0.73616
12.4	0.691299
12.4167	0.646591
12.4333	0.599442
12.45	0.553207
12.4667	0.527267
12.4833	0.476608
12.5	0.438767
12.5167	0.403976
12.5333	0.390854
12.55	0.346603
12.5667	0.313644
12.5833	0.283127
12.6	0.250931
12.6167	0.220261
12.6333	0.193863
12.65	0.147171
12.6667	0.136185
12.6833	0.11879
12.7	0.0952911
12.7167	0.0666046
12.7333	0.0423431
12.75	0.0318146
12.7667	0.00648499
12.7833	-0.0136566
12.8	-0.0418854
12.8167	-0.0258636
12.8333	-0.0553131
12.85	-0.0684357
12.8667	-0.0705719
12.8833	-0.0774384
12.9	-0.0765228
12.9167	-0.0778961
12.9333	-0.0997162
12.95	-0.103989
12.9667	-0.104904
12.9833	-0.101852
13	-0.0827789
13.0167	-0.0676727
13.0333	-0.0611115
13.05	-0.0576019
13.0667	-0.036087
13.0833	-0.0275421
13.1	-0.0165558
13.1167	-0.00785828
13.1333	0.0157928
13.15	0.0487518
13.1667	0.0424957
13.1833	0.0495148
13.2	0.0693512
13.2167	0.09758
13.2333	0.13298
13.25	0.145035
13.2667	0.170517
13.2833	0.18486
13.3	0.203781
13.3167	0.237198
13.3333	0.255966
13.35	0.290756
13.3667	0.322189
13.3833	0.35347
13.4	0.389938
13.4167	0.415268
13.4333	0.426254
13.45	0.455399
13.4667	0.485916
13.4833	0.502548
13.5	0.525742
13.5167	0.55275
13.5333	0.579758
13.55	0.607529
13.5667	0.603104
13.5833	0.648422
13.6	0.680313
13.6167	0.695877
13.6333	0.731278
13.65	0.764542
13.6667	0.797348
13.6833	0.815964
13.7	0.842056
13.7167	0.851822
13.7333	0.895004
13.75	0.916672
13.7667	0.972061
13.7833	0.994949
13.8	1.01357
13.8167	1.0717
13.8333	1.10298
13.85	1.11259
13.8667	1.14601
13.8833	1.1689
13.9	1.19041
13.9167	1.20293
13.9333	1.26274
13.95	1.29021
13.9667	1.32469
13.9833	1.34407
14	1.36803
14.0167	1.39473
14.0333	1.42952
14.05	1.46141
14.0667	1.48399
14.0833	1.50536
14.1	1.53145
14.1167	1.55205
14.1333	1.58623
14.15	1.63185
14.1667	1.64436
14.1833	1.65993
14.2	1.69609
14.2167	1.74431
14.2333	1.77956
14.25	1.80153
14.2667	1.82091
14.2833	1.83342
14.3	1.87019
14.3167	1.8969
14.3333	1.92146
14.35	1.94115
14.3667	1.96373
14.3833	1.99211
14.4	2.02446
14.4167	2.04155
14.4333	2.07268
14.45	2.08458
14.4667	2.09602
14.4833	2.12975
14.5	2.16194
14.5167	2.16667
14.5333	2.17583
14.55	2.20726
14.5667	2.24831
14.5833	2.26402
14.6	2.27272
14.6167	2.29225
14.6333	2.29774
14.65	2.31667
14.6667	2.33833
14.6833	2.35588
14.7	2.36794
14.7167	2.39494
14.7333	2.416
14.75	2.4218
14.7667	2.4189
14.7833	2.42989
14.8	2.44057
14.8167	2.4543
14.8333	2.45613
14.85	2.46407
14.8667	2.48756
14.8833	2.51045
14.9	2.52327
14.9167	2.53502
14.9333	2.55547
14.95	2.55974
14.9667	2.57439
14.9833	2.58888
15	2.58568
15.0167	2.59407
15.0333	2.61543
15.05	2.61757
15.0667	2.60109
15.0833	2.6104
15.1	2.6165
15.1167	2.62459
15.1333	2.6432
15.15	2.66396
15.1667	2.69096
15.1833	2.69035
15.2	2.70332
15.2167	2.70897
15.2333	2.72713
15.25	2.74071
15.2667	2.74086
15.2833	2.74757
15.3	2.76619
15.3167	2.77641
15.3333	2.77916
15.35	2.77977
15.3667	2.80846
15.3833	2.81609
15.4	2.81639
15.4167	2.82219
15.4333	2.82356
15.45	2.81761
15.4667	2.84477
15.4833	2.85408
15.5	2.8643
15.5167	2.87254
15.5333	2.86766
15.55	2.8756
15.5667	2.88506
15.5833	2.88277
15.6	2.90977
15.6167	2.9113
15.6333	2.91222
15.65	2.92625
15.6667	2.94548
15.6833	2.93327
15.7	2.93312
15.7167	2.94655
15.7333	2.94884
15.75	2.96654
15.7667	2.98683
15.7833	2.98027
15.8	2.96791
15.8167	2.98241
15.8333	2.99217
15.85	2.98088
15.8667	2.96867
15.8833	2.97371
15.9	2.98561
15.9167	2.98912
15.9333	2.985
15.95	2.9879
15.9667	3.00041
15.9833	3.01826
16	3.00499
16.0167	3.02742
16.0333	3.04131
16.05	3.0323
16.0667	3.05244
16.0833	3.03673
16.1	3.04619
16.1167	3.06557
16.1333	3.06313
16.15	3.06389
16.1667	3.07045
16.1833	3.06664
16.2	3.05931
16.2167	3.06694
16.2333	3.08052
16.25	3.05305
16.2667	3.04741
16.2833	3.0497
16.3	3.06175
16.3167	3.06648
16.3333	3.07762
16.35	3.07014
16.3667	3.0732
16.3833	3.08235
16.4	3.08128
16.4167	3.07732
16.4333	3.07503
16.45	3.07472
16.4667	3.08388
16.4833	3.07976
16.5	3.07106
16.5167	3.07533
16.5333	3.08464
16.55	3.07457
16.5667	3.07121
16.5833	3.08342
16.6	3.07579
16.6167	3.08403
16.6333	3.09959
16.65	3.09486
16.6667	3.09685
16.6833	3.09792
16.7	3.11302
16.7167	3.09776
16.7333	3.106
16.75	3.10555
16.7667	3.10066
16.7833	3.10677
16.8	3.12935
16.8167	3.10295
16.8333	3.08693
16.85	3.09029
16.8667	3.11424
16.8833	3.11485
16.9	3.10326
16.9167	3.10616
16.9333	3.10631
16.95	3.1144
16.9667	3.10173
16.9833	3.106
17	3.1144
17.0167	3.11241
17.0333	3.11363
17.05	3.09288
17.0667	3.09273
17.0833	3.09883
17.1	3.09792
17.1167	3.1031
17.1333	3.11302
17.15	3.11745
17.1667	3.11989
17.1833	3.10417
17.2	3.10936
17.2167	3.08846
17.2333	3.10204
17.25	3.11714
17.2667	3.11531
17.2833	3.11028
17.3	3.12584
17.3167	3.14858
17.3333	3.14446
17.35	3.14949
17.3667	3.13637
17.3833	3.1382
17.4	3.13469
17.4167	3.14354
17.4333	3.14064
17.45	3.14781
17.4667	3.13774
17.4833	3.14568
17.5	3.1797
17.5167	3.1736
17.5333	3.16765
17.55	3.14873
17.5667	3.14644
17.5833	3.15331
17.6	3.16475
17.6167	3.16521
17.6333	3.15971
17.65	3.15605
17.6667	3.17085
17.6833	3.16154
17.7	3.17192
17.7167	3.162
17.7333	3.15559
17.75	3.16353
17.7667	3.1617
17.7833	3.14323
17.8	3.13911
17.8167	3.15407
17.8333	3.16002
17.85	3.15559
17.8667	3.14659
17.8833	3.14674
17.9	3.16078
17.9167	3.17177
17.9333	3.17421
17.95	3.14858
17.9667	3.13408
17.9833	3.12904
18	3.13011
18.0167	3.13286
18.0333	3.13072
18.05	3.12706
18.0667	3.12645
18.0833	3.13942
18.1	3.13057
18.1167	3.12706
18.1333	3.1385
18.15	3.12294
18.1667	3.13423
18.1833	3.13896
18.2	3.13499
18.2167	3.12462
18.2333	3.13637
18.25	3.12599
18.2667	3.13087
18.2833	3.14262
18.3	3.13087
18.3167	3.13072
18.3333	3.1472
18.35	3.15041
18.3667	3.14446
18.3833	3.1501
18.4	3.15086
18.4167	3.15727
18.4333	3.17589
18.45	3.18169
18.4667	3.19115
18.4833	3.17802
18.5	3.18428
18.5167	3.19328
18.5333	3.18825
18.55	3.20274
18.5667	3.19099
18.5833	3.17528
18.6	3.17909
18.6167	3.19145
18.6333	3.18001
18.65	3.19008
18.6667	3.19878
18.6833	3.20671
18.7	3.21877
18.7167	3.19847
18.7333	3.18245
18.75	3.20183
18.7667	3.20839
18.7833	3.19908
18.8	3.19206
18.8167	3.19832
18.8333	3.20915
18.85	3.21358
18.8667	3.2151
18.8833	3.21175
18.9	3.2325
18.9167	3.23524
18.9333	3.24074
18.95	3.25539
18.9667	3.28011
18.9833	3.28865
19	3.27904
19.0167	3.30025
19.0333	3.30116
19.05	3.30589
19.0667	3.32085
19.0833	3.31825
19.1	3.33153
19.1167	3.32878
19.1333	3.33229
19.15	3.33855
19.1667	3.33107
19.1833	3.32634
19.2	3.34511
19.2167	3.34419
19.2333	3.3477
19.25	3.34847
19.2667	3.34282
19.2833	3.35289
19.3	3.3596
19.3167	3.34373
19.3333	3.35197
19.35	3.37242
19.3667	3.38341
19.3833	3.37746
19.4	3.38066
19.4167	3.40309
19.4333	3.41209
19.45	3.4211
19.4667	3.45024
19.4833	3.47847
19.5	3.50273
19.5167	3.53737
19.5333	3.58101
19.55	3.62663
19.5667	3.67836
19.5833	3.75771
19.6	3.82515
19.6167	3.88878
19.6333	3.95027
19.65	4.02794
19.6667	4.11324
19.6833	4.18205
19.7	4.23134
19.7167	4.29695
19.7333	4.35707
19.75	4.40376
19.7667	4.44939
19.7833	4.47212
19.8	4.46571
19.8167	4.47365
19.8333	4.45747
19.85	4.42375
19.8667	4.39034
19.8833	4.36745
19.9	4.31526
19.9167	4.2527
19.9333	4.18739
19.95	4.1433
19.9667	4.07341
19.9833	4.02184
20	3.98552
20.0167	3.9167
20.0333	3.8723
20.05	3.82164
20.0667	3.77174
20.0833	3.7339
20.1	3.70033
20.1167	3.65669
20.1333	3.61031
20.15	3.55385
20.1667	3.48442
20.1833	3.42934
20.2	3.37578
20.2167	3.28316
20.2333	3.19252
20.25	3.0854
20.2667	2.96303
20.2833	2.78709
20.3	2.62337
20.3167	2.40807
20.3333	2.17064
20.35	1.87218
20.3667	1.52687
20.3833	1.15532
20.4	0.727158
20.4167	0.272751
20.4333	-0.237503
20.45	-0.795212
20.4667	-1.37993
20.4833	-1.98036
20.5	-2.61681
20.5167	-3.26042
20.5333	-3.90923
20.55	-4.53148
20.5667	-5.14671
20.5833	-5.70473
20.6	-6.24031
20.6167	-6.70128
20.6333	-7.09404
20.65	-7.43736
20.6667	-7.70958
20.6833	-7.90794
20.7	-8.02223
20.7167	-8.05946
20.7333	-8.03673
20.75	-7.97585
20.7667	-7.84142
20.7833	-7.66655
20.8	-7.43202
20.8167	-7.17201
20.8333	-6.90147
20.85	-6.62285
20.8667	-6.3372
20.8833	-6.03935
20.9	-5.756
20.9167	-5.48348
20.9333	-5.22408
20.95	-4.96132
20.9667	-4.70482
20.9833	-4.46098
21	-4.21745
21.0167	-3.9724
21.0333	-3.7455
21.05	-3.50014
21.0667	-3.28957
21.0833	-3.08723
21.1	-2.85744
21.1167	-2.64732
21.1333	-2.45247
21.15	-2.20833
21.1667	-1.99013
21.1833	-1.78108
21.2	-1.56258
21.2167	-1.34514
21.2333	-1.13152
21.25	-0.939407
21.2667	-0.733872
21.2833	-0.533676
21.3	-0.325394
21.3167	-0.142288
21.3333	0.00694275
21.35	0.147324
21.3667	0.30098
21.3833	0.444412
21.4	0.56633
21.4167	0.706101
21.4333	0.836411
21.45	0.933304
21.4667	1.04805
21.4833	1.14998
21.5	1.24199
21.5167	1.33614
21.5333	1.42525
21.55	1.47408
21.5667	1.54549
21.5833	1.63216
21.6	1.71104
21.6167	1.7556
21.6333	1.81572
21.65	1.8647
21.6667	1.9088
21.6833	1.94862
21.7	2.01103
21.7167	2.04338
21.7333	2.08672
21.75	2.12654
21.7667	2.15752
21.7833	2.2039
21.8	2.23961
21.8167	2.25472
21.8333	2.29118
21.85	2.32933
21.8667	2.33696
21.8833	2.36748
21.9	2.39204
21.9167	2.41631
21.9333	2.42256
21.95	2.45583
21.9667	2.47093
21.9833	2.48299
22	2.49764
22.0167	2.52953
22.0333	2.55287
22.05	2.58293
22.0667	2.58492
22.0833	2.61116
22.1	2.61482
22.1167	2.62169
22.1333	2.62672
22.15	2.65038
22.1667	2.66594
22.1833	2.67784
22.2	2.67113
22.2167	2.67921
22.2333	2.6841
22.25	2.7018
22.2667	2.69997
22.2833	2.71904
22.3	2.7433
22.3167	2.74483
22.3333	2.74818
22.35	2.75612
22.3667	2.76009
22.3833	2.78328
22.4	2.79717
22.4167	2.80602
22.4333	2.82509
22.45	2.81792
22.4667	2.83257
22.4833	2.82127
22.5	2.83394
22.5167	2.84691
22.5333	2.8495
22.55	2.84416
22.5667	2.86491
22.5833	2.87071
22.6	2.882
22.6167	2.87941
22.6333	2.88795
22.65	2.88261
22.6667	2.88353
22.6833	2.90901
22.7	2.89925
22.7167	2.90443
22.7333	2.92
22.75	2.94121
22.7667	2.93236
22.7833	2.93083
22.8	2.94868
22.8167	2.95219
22.8333	2.96257
22.85	2.96623
22.8667	2.95357
22.8833	2.9438
22.9	2.95631
22.9167	2.97981
22.9333	2.9818
22.95	2.96669
22.9667	2.97417
22.9833	2.97447
23	2.97661
23.0167	2.97615
23.0333	3.00056
23.05	2.99294
23.0667	2.97615
23.0833	3.00056
23.1	2.99355
23.1167	2.99904
23.1333	2.99751
23.15	2.99065
23.1667	3.00804
23.1833	3.0117
23.2	3.00087
23.2167	3.01186
23.2333	3.0088
23.25	2.99599
23.2667	3.01216
23.2833	3.00743
23.3	3.01125
23.3167	3.01537
23.3333	3.0265
23.35	3.04436
23.3667	3.03917
23.3833	3.032
23.4	3.02757
23.4167	3.02086
23.4333	3.02437
23.45	3.04283
23.4667	3.05
23.4833	3.04878
23.5	3.04466
23.5167	3.03246
23.5333	3.05702
23.55	3.05855
23.5667	3.0616
23.5833	3.0616
23.6	3.0584
23.6167	3.06175
23.6333	3.05641
23.65	3.04497
23.6667	3.05092
23.6833	3.04726
23.7	3.04909
23.7167	3.06404
23.7333	3.04543
23.75	3.06557
23.7667	3.05748
23.7833	3.04482
23.8	3.05824
23.8167	3.06572
23.8333	3.07076
23.85	3.06953
23.8667	3.05748
23.8833	3.05946
23.9	3.0587
23.9167	3.04863
23.9333	3.05244
23.95	3.05885
23.9667	3.06557
23.9833	3.0645
24	3.06938
24.0167	3.07594
24.0333	3.06709
24.05	3.08754
24.0667	3.07488
24.0833	3.0616
24.1	3.08388
24.1167	3.06526
24.1333	3.06404
24.15	3.07106
24.1667	3.0883
24.1833	3.08632
24.2	3.07579
24.2167	3.06191
24.2333	3.05458
24.25	3.0677
24.2667	3.09547
24.2833	3.08571
24.3	3.0732
24.3167	3.08754
24.3333	3.10066
24.35	3.09029
24.3667	3.0941
24.3833	3.09685
24.4	3.09166
24.4167	3.09898
24.4333	3.09792
24.45	3.09837
24.4667	3.10112
24.4833	3.10158
24.5	3.10555
24.5167	3.10997
24.5333	3.11516
24.55	3.10783
24.5667	3.11302
24.5833	3.11455
24.6	3.11211
24.6167	3.10921
24.6333	3.12202
24.65	3.12981
24.6667	3.13133
24.6833	3.12325
24.7	3.11729
24.7167	3.1176
24.7333	3.1028
24.75	3.12157
24.7667	3.12096
24.7833	3.12447
24.8	3.14201
24.8167	3.13103
24.8333	3.12111
24.85	3.13103
24.8667	3.13301
24.8833	3.13423
24.9	3.12721
24.9167	3.12309
24.9333	3.1234
24.95	3.11134
24.9667	3.1234
24.9833	3.12019
25	3.10432
25.0167	3.10249
25.0333	3.10402
25.05	3.09578
25.0667	3.08205
25.0833	3.08189
25.1	3.08693
25.1167	3.10555
25.1333	3.09868
25.15	3.09837
25.1667	3.08937
25.1833	3.10066
25.2	3.11317
25.2167	3.09273
25.2333	3.0967
25.25	3.09044
25.2667	3.07854
25.2833	3.097
25.3	3.09654
25.3167	3.1028
25.3333	3.09517
25.35	3.08128
25.3667	3.10097
25.3833	3.09502
25.4	3.10448
25.4167	3.09685
25.4333	3.1031
25.45	3.1002
25.4667	3.10616
25.4833	3.1147
25.5	3.11317
25.5167	3.12141
25.5333	3.13057
25.55	3.10493
25.5667	3.12569
25.5833	3.12508
25.6	3.10814
25.6167	3.11089
25.6333	3.13423
25.65	3.12935
25.6667	3.1292
25.6833	3.14293
25.7	3.13255
25.7167	3.12752
25.7333	3.13057
25.75	3.11501
25.7667	3.12996
25.7833	3.14476
25.8	3.14049
25.8167	3.14323
25.8333	3.13347
25.85	3.13362
25.8667	3.11943
25.8833	3.12096
25.9	3.12859
25.9167	3.13072
25.9333	3.13133
25.95	3.13988
25.9667	3.13316
25.9833	3.14201
26	3.14171
26.0167	3.15422
26.0333	3.15758
26.05	3.14751
26.0667	3.13271
26.0833	3.14262
26.1	3.13683
26.1167	3.13011
26.1333	3.12752
26.15	3.14262
26.1667	3.13805
26.1833	3.12782
26.2	3.12767
26.2167	3.1205
26.2333	3.11424
26.25	3.12264
26.2667	3.12889
26.2833	3.13972
26.3	3.13683
26.3167	3.14034
26.3333	3.13438
26.35	3.14339
26.3667	3.14903
26.3833	3.15971
26.4	3.15849
26.4167	3.14232
26.4333	3.12981
26.45	3.15605
26.4667	3.15987
26.4833	3.16917
26.5	3.16948
26.5167	3.15636
26.5333	3.15926
26.55	3.15743
26.5667	3.1675
26.5833	3.15315
26.6	3.15529
26.6167	3.16948
26.6333	3.17467
26.65	3.162
26.6667	3.15956
26.6833	3.17329
26.7	3.1855
26.7167	3.16444
26.7333	3.16902
26.75	3.1646
26.7667	3.17131
26.7833	3.18352
26.8	3.18001
26.8167	3.19588
26.8333	3.18703
26.85	3.20015
26.8667	3.2061
26.8833	3.20473
26.9	3.2003
26.9167	3.2
26.9333	3.20961
26.95	3.23708
26.9667	3.24593
26.9833	3.23677
27	3.26317
27.0167	3.25554
27.0333	3.26576
27.05	3.30315
27.0667	3.32848
27.0833	3.33641
27.1	3.3622
27.1167	3.38661
27.1333	3.42079
27.15	3.4597
27.1667	3.51799
27.1833	3.55629
27.2	3.59367
27.2167	3.65044
27.2333	3.72307
27.25	3.77754
27.2667	3.85307
27.2833	3.91228
27.3	3.98766
27.3167	4.06364
27.3333	4.15352
27.35	4.22661
27.3667	4.3029
27.3833	4.37325
27.4	4.46602
27.4167	4.56139
27.4333	4.65019
27.45	4.74281
27.4667	4.81728
27.4833	4.90822
27.5	4.97688
27.5167	5.04402
27.5333	5.12077
27.55	5.19814
27.5667	5.25963
27.5833	5.29717
27.6	5.36873
27.6167	5.42397
27.6333	5.46303
27.65	5.48714
27.6667	5.51445
27.6833	5.53932
27.7	5.55824
27.7167	5.56358
27.7333	5.55931
27.75	5.55199
27.7667	5.54832
27.7833	5.53429
27.8	5.50926
27.8167	5.47585
27.8333	5.46089
27.85	5.41176
27.8667	5.36171
27.8833	5.34004
27.9	5.28282
27.9167	5.26085
27.9333	5.19936
27.95	5.13741
27.9667	5.09483
27.9833	5.05287
28	4.99016
28.0167	4.93431
28.0333	4.87999
28.05	4.81819
28.0667	4.76601
28.0833	4.70787
28.1	4.66957
28.1167	4.61433
28.1333	4.57207
28.15	4.51424
28.1667	4.46541
28.1833	4.43062
28.2	4.40239
28.2167	4.37309
28.2333	4.31526
28.25	4.26308
28.2667	4.24355
28.2833	4.19579
28.3	4.15092
28.3167	4.12895
28.3333	4.09554
28.35	4.05952
28.3667	4.01482
28.3833	3.99544
28.4	3.96873
28.4167	3.96523
28.4333	3.94905
28.45	3.9016
28.4667	3.8755
28.4833	3.8726
28.5	3.85918
28.5167	3.82134
28.5333	3.80745
28.55	3.79601
28.5667	3.77541
28.5833	3.77617
28.6	3.7574
28.6167	3.7339
28.6333	3.7336
28.65	3.7159
28.6667	3.6985
28.6833	3.69957
28.7	3.69179
28.7167	3.67638
28.7333	3.66005
28.75	3.65105
28.7667	3.64189
28.7833	3.62648
28.8	3.61
28.8167	3.60832
28.8333	3.61031
28.85	3.59993
28.8667	3.57552
28.8833	3.5537
28.9	3.54057
28.9167	3.53035
28.9333	3.53981
28.95	3.52745
28.9667	3.53645
28.9833	3.51372
29	3.50212
29.0167	3.49022
29.0333	3.48076
29.05	3.4861
29.0667	3.47862
29.0833	3.47023
29.1	3.46092
29.1167	3.45696
29.1333	3.45024
29.15	3.4478
29.1667	3.45177
29.1833	3.4362
29.2	3.43086
29.2167	3.42735
29.2333	3.4272
29.25	3.41972
29.2667	3.40263
29.2833	3.41423
29.3	3.41301
29.3167	3.40965
29.3333	3.39745
29.35	3.4066
29.3667	3.41133
29.3833	3.40019
29.4	3.39211
29.4167	3.38097
29.4333	3.36952
29.45	3.37349
29.4667	3.38051
29.4833	3.37807
29.5	3.36769
29.5167	3.35503
29.5333	3.34755
29.55	3.34633
29.5667	3.34953
29.5833	3.34862
29.6	3.34892
29.6167	3.33565
29.6333	3.33839
29.65	3.34114
29.6667	3.33733
29.6833	3.32924
29.7	3.34084
29.7167	3.31627
29.7333	3.31596
29.75	3.32573
29.7667	3.31337
29.7833	3.33321
29.8	3.34633
29.8167	3.34496
29.8333	3.34618
29.85	3.34099
29.8667	3.32024
29.8833	3.31871
29.9	3.31596
29.9167	3.31078
29.9333	3.31932
29.95	3.34908
29.9667	3.33595
29.9833	3.33916
30	3.31184

## Sheet: MW Results
Administrative Information
File name	ICF_04_12_2024-0003.sample
Analysed by	OBPC
Date of analysis	06 December 2024 14:00:45
Analysis comments
Analysis Module	GPC Analysis
MW Averages
Peaks	Mp (g/mol)	Mn (g/mol)	Mw (g/mol)	Mz (g/mol)	Mz+1 (g/mol)	Mv (g/mol)	PD
Peak 1	180805	44330	282064	949245	1988460	825162	6.36282
Sample Parameters
Injection volume (µL)	200
Concentration options	Undefined
Concentration (mg/mL)	1
dn/dc (mL/g)	0.1
UV extinction coefficient [(mg/mL)-¹][cm-¹]	1
Mark-Houwink K ((10e-5) dL/g)	14.1
Mark-Houwink Alpha	0.7
Concentration Detector Used in Analysis	RI
Baseline regions	Start (mins)	End (mins)
Baseline region 1	6.81667	8.31667
Baseline region 2	17.8333	18.1333
Peaks	Start (mins)	End (mins)
Peak 1	10.5167	16.4
	Trace	Peak Max RT (mins)	Peak Area (mV.s)	Peak Height (mV)
	RI	12.9667	441.203	-3.29401
Flowrate region	Start (mins)	End (mins)
IDD
Reference detector	Undefined
IDD Undefined (secs)	0
Last modified by	OBPC
Last modified date	06 December 2024 14:00:45
Comments
System Calibration
Detector Constants
Entered Parameters For Concentration
Concentration (mg/mL)	0
Injection volume (µL)	0
dn/dc (mL/g)	0
UV extinction coefficient [(mg/mL)-¹][cm-¹]	0
Eluent refractive index	0
Flow rate (mL/min)	0
Comments
Entered Parameters For LS
Mp	0
LS wavelength (nm)	0
Comments
Entered Parameters For Viscometer
Known IV (dL/g)	0
Use Constant Inlet Pressure	No
Comments
System Calibration Information
Created by	OBPC
Creation date	29 October 2024 11:18:00
Last modified by	OBPC
Last modified date	29 October 2024 11:18:00
Information
Sample file used for calibration
Concentration Regions
Baseline regions	Start (mins)	End (mins)
Peaks	Start (mins)	End (mins)
Flowrate region	Start (mins)	End (mins)
LS Regions
Baseline regions	Start (mins)	End (mins)
Peaks	Start (mins)	End (mins)
Flowrate region	Start (mins)	End (mins)
VS Regions
Baseline regions	Start (mins)	End (mins)
Peaks	Start (mins)	End (mins)
Flowrate region	Start (mins)	End (mins)
System Calibration Peak Information
Channel	Peak Max RT (mins)	Peak Height (mV)	Peak Area (mV.s)
Flowrate Information
FRM Name
FRM RT (mins)	0
FRCF	1
Column Calibration
Name	2024-10-29-001
Created By	OBPC
Creation Date	29/10/2024 16:43:21
Last Modified By	OBPC
Last Modified	29/10/2024 16:46:00
High Limit RT (mins)	10.3167
Low Limit RT (mins)	17.05
High Limit MW	6542896
Low Limit MW	585
K (Input) ((10e-5) dL/g)	14.1
Alpha (Input)	0.7
Calibration Flow Marker Name
Calibration Flow Marker RT (mins)	0
Calibration Comments	GPC Column Calibration created 29 October 2024 by OBPC GPC Column Calibration amended 29 October 2024 by OBPC GPC Column Calibration amended 29 October 2024 by OBPC
Calibration Type	GPC Narrow Standard
Curve Fit Type	Polynomial
Order Of Curve Fit	5
Number Of Points	11
Curve Fit Equation	y = - 0.0006266x^5 + 0.04142x^4 - 1.085x^3 + 14.06x^2 - 90.8x + 242.2
Coeff a	242.186
Coeff b	-90.7983
Coeff c	14.0588
Coeff d	-1.08465
Coeff e	0.0414232
Coeff f	-0.000626569
Residual Sum Of Squares	0.000581819
Corrected Sum Of Squares	18.6999
Coefficient Of Determination	0.999969
Standard Y Error Estimate	0.0107872
Linear Correlation Coefficient	-0.999868

## Sheet: Slice Table
Slice Table
RT (mins)	RI	Norm Ht	Cum Ht	Mw (g/mol)	logM	dwdlogM	Outside Calib	Peak
10.5167	-0.0347777	7.8815e-05	0.999957	4990736	6.69816	0.00895873	No	1
10.5333	-0.0414819	9.40084e-05	0.999862	4881221	6.68853	0.0106647	No	1
10.55	-0.0491016	0.000111277	0.999756	4774335	6.67891	0.0114768	No	1
10.5667	-0.0481764	0.00010918	0.999642	4670001	6.66932	0.012219	No	1
10.5833	-0.0551858	0.000125065	0.999509	4568143	6.65974	0.0155292	No	1
10.6	-0.0759281	0.000172072	0.999345	4468690	6.65018	0.0189045	No	1
10.6167	-0.0833952	0.000188994	0.999165	4371571	6.64064	0.0186627	No	1
10.6333	-0.0736199	0.000166841	0.998994	4276720	6.63111	0.0174192	No	1
10.65	-0.0726947	0.000164744	0.998827	4184073	6.6216	0.0175165	No	1
10.6667	-0.0742109	0.00016818	0.998658	4093567	6.6121	0.018068	No	1
10.6833	-0.0771004	0.000174729	0.998489	4005142	6.60262	0.0175613	No	1
10.7	-0.0697665	0.000158108	0.998319	3918740	6.59315	0.0184584	No	1
10.7167	-0.0844052	0.000191283	0.998129	3834305	6.58369	0.0217157	No	1
10.7333	-0.0967552	0.000219271	0.997928	3751785	6.57424	0.0208953	No	1
10.75	-0.0773668	0.000175332	0.997735	3671126	6.5648	0.0198331	No	1
10.7667	-0.0877331	0.000198825	0.997539	3592279	6.55537	0.0217762	No	1
10.7833	-0.0933692	0.000211598	0.997335	3515195	6.54595	0.0215726	No	1
10.8	-0.0858827	0.000194632	0.997128	3439827	6.53654	0.0225064	No	1
10.8167	-0.100979	0.000228844	0.996903	3366131	6.52713	0.0252606	No	1
10.8333	-0.108599	0.000246112	0.996654	3294063	6.51773	0.0277775	No	1
10.85	-0.121712	0.000275829	0.996385	3223580	6.50834	0.0294483	No	1
10.8667	-0.122312	0.00027719	0.996103	3154641	6.49895	0.0306398	No	1
10.8833	-0.131458	0.000297917	0.995805	3087208	6.48957	0.0327887	No	1
10.9	-0.139993	0.00031726	0.995489	3021243	6.48019	0.0346973	No	1
10.9167	-0.147155	0.00033349	0.995152	2956707	6.47081	0.0372134	No	1
10.9333	-0.160726	0.000364245	0.994805	2893567	6.46143	0.0367583	No	1
10.95	-0.143321	0.000324801	0.994466	2831786	6.45206	0.0355072	No	1
10.9667	-0.150331	0.000340686	0.994128	2771333	6.44269	0.0365416	No	1
10.9833	-0.151847	0.000344123	0.993781	2712173	6.43332	0.0376477	No	1
11	-0.159466	0.000361391	0.993414	2654277	6.42395	0.0407074	No	1
11.0167	-0.177157	0.000401482	0.993025	2597613	6.41457	0.0422882	No	1
11.0333	-0.17257	0.000391086	0.992619	2542153	6.4052	0.0442352	No	1
11.05	-0.193312	0.000438093	0.992186	2487868	6.39583	0.0481341	No	1
11.0667	-0.204899	0.000464352	0.991735	2434729	6.38645	0.048064	No	1
11.0833	-0.192835	0.000437012	0.991288	2382711	6.37707	0.0473646	No	1
11.1	-0.199234	0.000451513	0.990837	2331787	6.36769	0.048727	No	1
11.1167	-0.20426	0.000462903	0.990379	2281933	6.3583	0.0489623	No	1
11.1333	-0.201351	0.000456311	0.989915	2233122	6.34891	0.0498208	No	1
11.15	-0.211564	0.000479458	0.989427	2185333	6.33952	0.0540066	No	1
11.1667	-0.236274	0.000535456	0.988902	2138541	6.33012	0.0576337	No	1
11.1833	-0.24191	0.000548228	0.988366	2092725	6.32071	0.0564016	No	1
11.2	-0.226336	0.000512935	0.987838	2047862	6.3113	0.0558297	No	1
11.2167	-0.237466	0.000538156	0.9873	2003932	6.30188	0.0583398	No	1
11.2333	-0.247527	0.000560957	0.986733	1960914	6.29246	0.0621093	No	1
11.25	-0.269185	0.000610039	0.986124	1918787	6.28303	0.0669885	No	1
11.2667	-0.288554	0.000653934	0.985469	1877533	6.27359	0.0717474	No	1
11.2833	-0.309296	0.000700941	0.98477	1837132	6.26414	0.076221	No	1
11.3	-0.326376	0.000739649	0.984035	1797566	6.25468	0.0792764	No	1
11.3167	-0.335369	0.000760029	0.983281	1758818	6.24522	0.0801136	No	1
11.3333	-0.333986	0.000756895	0.982513	1720869	6.23575	0.0819133	No	1
11.35	-0.351066	0.000795603	0.981719	1683703	6.22627	0.0855659	No	1
11.3667	-0.365247	0.000827741	0.980888	1647303	6.21677	0.0895543	No	1
11.3833	-0.385227	0.000873019	0.980019	1611653	6.20727	0.0933314	No	1
11.4	-0.397729	0.000901353	0.979121	1576738	6.19776	0.0954442	No	1
11.4167	-0.403823	0.000915163	0.978191	1542542	6.18824	0.0998908	No	1
11.4333	-0.436009	0.000988105	0.977208	1509050	6.1787	0.106355	No	1
11.45	-0.459193	0.00104065	0.976169	1476247	6.16916	0.111443	No	1
11.4667	-0.479935	0.00108765	0.975081	1444121	6.1596	0.116173	No	1
11.4833	-0.50022	0.00113362	0.97395	1412655	6.15004	0.120382	No	1
11.5	-0.51669	0.00117095	0.972771	1381838	6.14046	0.125697	No	1
11.5167	-0.546434	0.00123836	0.971539	1351656	6.13087	0.131141	No	1
11.5333	-0.564125	0.00127845	0.970255	1322097	6.12126	0.136369	No	1
11.55	-0.592191	0.00134205	0.968923	1293146	6.11165	0.140647	No	1
11.5667	-0.601947	0.00136416	0.967544	1264793	6.10202	0.14579	No	1
11.5833	-0.637491	0.00144471	0.966109	1237025	6.09238	0.151903	No	1
11.6	-0.655639	0.00148584	0.964615	1209831	6.08272	0.157656	No	1
11.6167	-0.688283	0.00155982	0.963061	1183199	6.07306	0.163785	No	1
11.6333	-0.709788	0.00160856	0.961449	1157118	6.06338	0.169323	No	1
11.65	-0.73755	0.00167147	0.959778	1131576	6.05368	0.175467	No	1
11.6667	-0.764395	0.00173231	0.958047	1106564	6.04398	0.181183	No	1
11.6833	-0.788647	0.00178727	0.956257	1082071	6.03426	0.186933	No	1
11.7	-0.815951	0.00184915	0.954394	1058087	6.02452	0.195895	No	1
11.7167	-0.867974	0.00196704	0.952442	1034600	6.01477	0.2046	No	1
11.7333	-0.893293	0.00202443	0.950404	1011603	6.00501	0.212941	No	1
11.75	-0.942417	0.00213575	0.948287	989085	5.99523	0.220108	No	1
11.7667	-0.957819	0.00217066	0.946113	967036	5.98544	0.223863	No	1
11.7833	-0.977646	0.00221559	0.943884	945448	5.97564	0.230884	No	1
11.8	-1.02143	0.00231481	0.94157	924311	5.96582	0.240417	No	1
11.8167	-1.06323	0.00240954	0.939172	903617	5.95598	0.247338	No	1
11.8333	-1.08458	0.00245793	0.93671	883357	5.94614	0.252605	No	1
11.85	-1.11219	0.0025205	0.934183	863523	5.93627	0.259801	No	1
11.8667	-1.15048	0.00260727	0.931584	844105	5.9264	0.266538	No	1
11.8833	-1.17427	0.0026612	0.928914	825097	5.91651	0.27329	No	1
11.9	-1.21287	0.00274866	0.926169	806490	5.9066	0.280771	No	1
11.9167	-1.24322	0.00281745	0.923352	788276	5.89668	0.287185	No	1
11.9333	-1.27266	0.00288417	0.920465	770447	5.88674	0.294085	No	1
11.95	-1.30744	0.00296299	0.917489	752997	5.87679	0.303952	No	1
11.9667	-1.36313	0.00308919	0.914405	735917	5.86683	0.315161	No	1
11.9833	-1.40996	0.00319533	0.911218	719201	5.85685	0.323654	No	1
12	-1.442	0.00326792	0.907947	702841	5.84686	0.330931	No	1
12.0167	-1.4783	0.0033502	0.904603	686830	5.83685	0.33729	No	1
12.0333	-1.5024	0.00340482	0.901172	671161	5.82683	0.347477	No	1
12.05	-1.57274	0.00356421	0.897626	655829	5.81679	0.359014	No	1
12.0667	-1.60904	0.00364649	0.893969	640825	5.80674	0.368647	No	1
12.0833	-1.66274	0.00376819	0.89021	626145	5.79667	0.37834	No	1
12.1	-1.69981	0.0038522	0.886352	611781	5.7866	0.387289	No	1
12.1167	-1.74711	0.00395937	0.882388	597726	5.7765	0.398219	No	1
12.1333	-1.80203	0.00408384	0.878311	583976	5.76639	0.408456	No	1
12.15	-1.84337	0.00417753	0.874138	570524	5.75627	0.416124	No	1
12.1667	-1.87556	0.00425047	0.86987	557364	5.74614	0.426061	No	1
12.1833	-1.93734	0.0043905	0.865496	544491	5.73599	0.435992	No	1
12.2	-1.96968	0.00446379	0.861021	531898	5.72583	0.444761	No	1
12.2167	-2.02125	0.00458065	0.85645	519580	5.71565	0.453513	No	1
12.2333	-2.05359	0.00465394	0.851791	507532	5.70546	0.46106	No	1
12.25	-2.09447	0.00474659	0.847047	495748	5.69526	0.468898	No	1
12.2667	-2.12956	0.0048261	0.842212	484223	5.68505	0.477703	No	1
12.2833	-2.17929	0.00493881	0.837274	472952	5.67482	0.48776	No	1
12.3	-2.22582	0.00504426	0.832231	461930	5.66458	0.497174	No	1
12.3167	-2.26991	0.00514418	0.827077	451151	5.65432	0.508156	No	1
12.3333	-2.33078	0.00528213	0.82181	440611	5.64406	0.517891	No	1
12.35	-2.36373	0.0053568	0.816445	430305	5.63378	0.525996	No	1
12.3667	-2.40995	0.00546156	0.810981	420229	5.62349	0.53582	No	1
12.3833	-2.45862	0.00557184	0.805411	410377	5.61318	0.545462	No	1
12.4	-2.50332	0.00567314	0.799737	400745	5.60287	0.55464	No	1
12.4167	-2.54786	0.0057741	0.793961	391328	5.59254	0.564057	No	1
12.4333	-2.59485	0.00588058	0.78808	382123	5.5822	0.57363	No	1
12.45	-2.64092	0.00598499	0.782106	373124	5.57185	0.580872	No	1
12.4667	-2.6667	0.00604341	0.776048	364328	5.56149	0.588594	No	1
12.4833	-2.7172	0.00615785	0.769896	355731	5.55112	0.59761	No	1
12.5	-2.75488	0.00624324	0.763654	347328	5.54074	0.604888	No	1
12.5167	-2.78951	0.00632171	0.757344	339115	5.53035	0.609469	No	1
12.5333	-2.80247	0.00635109	0.750974	331088	5.51994	0.615083	No	1
12.55	-2.84655	0.006451	0.744529	323244	5.50953	0.622858	No	1
12.5667	-2.87935	0.00652533	0.738004	315579	5.49911	0.629138	No	1
12.5833	-2.90971	0.00659412	0.731408	308088	5.48867	0.635337	No	1
12.6	-2.94174	0.00666671	0.724742	300769	5.47823	0.641556	No	1
12.6167	-2.97225	0.00673585	0.718007	293617	5.46778	0.647149	No	1
12.6333	-2.99848	0.00679531	0.7112	286630	5.45732	0.654483	No	1
12.65	-3.04501	0.00690076	0.704318	279803	5.44685	0.660151	No	1
12.6667	-3.05584	0.00692529	0.697389	273134	5.43638	0.662658	No	1
12.6833	-3.07307	0.00696434	0.69042	266618	5.42589	0.666529	No	1
12.7	-3.09641	0.00701723	0.683399	260253	5.4154	0.671628	No	1
12.7167	-3.12493	0.00708187	0.676319	254036	5.4049	0.676818	No	1
12.7333	-3.14903	0.00713648	0.669189	247963	5.39439	0.68006	No	1
12.75	-3.1594	0.00715998	0.66202	242030	5.38387	0.683429	No	1
12.7667	-3.18456	0.00721701	0.654805	236237	5.37335	0.687845	No	1
12.7833	-3.20454	0.00726229	0.647537	230578	5.36282	0.692585	No	1
12.8	-3.23261	0.0073259	0.640235	225051	5.35228	0.693447	No	1
12.8167	-3.21643	0.00728922	0.632919	219654	5.34174	0.694458	No	1
12.8333	-3.24571	0.00735559	0.625572	214383	5.33119	0.698616	No	1
12.85	-3.25867	0.00738496	0.618193	209236	5.32064	0.699855	No	1
12.8667	-3.26065	0.00738944	0.610799	204210	5.31008	0.70044	No	1
12.8833	-3.26735	0.00740463	0.603398	199303	5.29951	0.700715	No	1
12.9	-3.26627	0.00740219	0.595994	194511	5.28894	0.70042	No	1
12.9167	-3.26748	0.00740493	0.588577	189832	5.27837	0.702579	No	1
12.9333	-3.28914	0.00745401	0.581132	185264	5.26779	0.705067	No	1
12.95	-3.29325	0.00746333	0.573669	180805	5.25721	0.705333	No	1
12.9667	-3.29401	0.00746504	0.566205	176451	5.24662	0.704834	No	1
12.9833	-3.29079	0.00745775	0.558756	172201	5.23604	0.702215	No	1
13	-3.27156	0.00741416	0.551339	168052	5.22544	0.698328	No	1
13.0167	-3.25629	0.00737956	0.543953	164002	5.21485	0.6958	No	1
13.0333	-3.24956	0.00736432	0.536586	160048	5.20425	0.694532	No	1
13.05	-3.24589	0.007356	0.52924	156189	5.19365	0.691686	No	1
13.0667	-3.22421	0.00730687	0.521924	152423	5.18305	0.688321	No	1
13.0833	-3.21551	0.00728714	0.514638	148746	5.17245	0.686102	No	1
13.1	-3.20436	0.00726187	0.507374	145158	5.16184	0.683886	No	1
13.1167	-3.1955	0.0072418	0.50014	141656	5.15123	0.680337	No	1
13.1333	-3.17169	0.00718783	0.492956	138239	5.14063	0.674215	No	1
13.15	-3.13856	0.00711277	0.48582	134903	5.13002	0.671307	No	1
13.1667	-3.14466	0.00712658	0.4787	131649	5.11942	0.671191	No	1
13.1833	-3.13748	0.0071103	0.471596	128472	5.10881	0.668305	No	1
13.2	-3.11748	0.00706498	0.464535	125373	5.0982	0.663171	No	1
13.2167	-3.08909	0.00700064	0.457538	122348	5.0876	0.656392	No	1
13.2333	-3.05352	0.00692005	0.450604	119397	5.07699	0.65136	No	1
13.25	-3.04131	0.00689236	0.443718	116517	5.06639	0.647404	No	1
13.2667	-3.01566	0.00683424	0.436877	113707	5.05579	0.64322	No	1
13.2833	-3.00116	0.00680137	0.430077	110965	5.04519	0.639755	No	1
13.3	-2.98207	0.00675812	0.423326	108290	5.03459	0.634267	No	1
13.3167	-2.9485	0.00668202	0.416635	105681	5.024	0.62881	No	1
13.3333	-2.92957	0.00663912	0.410004	103134	5.0134	0.62322	No	1
13.35	-2.89461	0.00655991	0.403442	100650	5.00281	0.61629	No	1
13.3667	-2.86302	0.00648831	0.396952	98226	4.99223	0.609748	No	1
13.3833	-2.83157	0.00641705	0.390538	95862	4.98165	0.602679	No	1
13.4	-2.79494	0.00633404	0.384196	93555	4.97107	0.596259	No	1
13.4167	-2.76945	0.00627627	0.377911	91305	4.96049	0.592582	No	1
13.4333	-2.7583	0.006251	0.37167	89110	4.94993	0.588509	No	1
13.45	-2.729	0.00618459	0.365485	86968	4.93936	0.582353	No	1
13.4667	-2.69832	0.00611506	0.359362	84879	4.9288	0.57755	No	1
13.4833	-2.68152	0.006077	0.353287	82842	4.91825	0.573545	No	1
13.5	-2.65817	0.00602407	0.347265	80854	4.9077	0.568436	No	1
13.5167	-2.631	0.00596249	0.341302	78915	4.89716	0.562926	No	1
13.5333	-2.60383	0.00590092	0.3354	77024	4.88663	0.557343	No	1
13.55	-2.57589	0.00583761	0.329544	75179	4.8761	0.555151	No	1
13.5667	-2.58016	0.00584727	0.323724	73379	4.86557	0.551082	No	1
13.5833	-2.53468	0.0057442	0.317971	71624	4.85506	0.543105	No	1
13.6	-2.50262	0.00567156	0.31229	69912	4.84455	0.538343	No	1
13.6167	-2.4869	0.00563592	0.306665	68242	4.83405	0.533208	No	1
13.6333	-2.45133	0.00555533	0.301107	66613	4.82356	0.526166	No	1
13.65	-2.41791	0.00547958	0.295627	65025	4.81308	0.519408	No	1
13.6667	-2.38494	0.00540486	0.290213	63475	4.8026	0.514237	No	1
13.6833	-2.36616	0.00536231	0.284855	61964	4.79214	0.509798	No	1
13.7	-2.33991	0.00530281	0.279542	60489	4.78168	0.506324	No	1
13.7167	-2.32998	0.00528031	0.27428	59052	4.77123	0.501001	No	1
13.7333	-2.28663	0.00518208	0.269085	57649	4.76079	0.494388	No	1
13.75	-2.2648	0.00513261	0.263971	56282	4.75037	0.486447	No	1
13.7667	-2.20925	0.00500671	0.258945	54948	4.73995	0.47837	No	1
13.7833	-2.1862	0.00495447	0.253987	53646	4.72954	0.474294	No	1
13.8	-2.16742	0.00491192	0.249097	52377	4.71914	0.466377	No	1
13.8167	-2.10912	0.0047798	0.244302	51140	4.70876	0.457072	No	1
13.8333	-2.07768	0.00470854	0.23958	49932	4.69838	0.453061	No	1
13.85	-2.06791	0.00468639	0.234907	48755	4.68802	0.448817	No	1
13.8667	-2.03433	0.00461029	0.23029	47606	4.67766	0.44312	No	1
13.8833	-2.01128	0.00455805	0.225731	46486	4.66732	0.438724	No	1
13.9	-1.9896	0.00450893	0.221216	45394	4.657	0.435467	No	1
13.9167	-1.97693	0.0044802	0.216762	44328	4.64668	0.428002	No	1
13.9333	-1.91695	0.00434428	0.212399	43289	4.63638	0.418882	No	1
13.95	-1.88932	0.00428167	0.208121	42275	4.62608	0.412539	No	1
13.9667	-1.85467	0.00420315	0.203908	41286	4.6158	0.407081	No	1
13.9833	-1.83513	0.00415887	0.199752	40322	4.60554	0.40278	No	1
14	-1.81101	0.00410421	0.195649	39381	4.59529	0.397666	No	1
14.0167	-1.78415	0.00404332	0.191609	38464	4.58505	0.391346	No	1
14.0333	-1.7492	0.00396411	0.187643	37569	4.57483	0.38444	No	1
14.05	-1.71714	0.00389147	0.183746	36696	4.56462	0.378879	No	1
14.0667	-1.6944	0.00383993	0.179905	35844	4.55442	0.37448	No	1
14.0833	-1.67287	0.00379115	0.176116	35013	4.54423	0.369684	No	1
14.1	-1.64662	0.00373165	0.172381	34203	4.53406	0.364966	No	1
14.1167	-1.62586	0.0036846	0.168703	33413	4.52392	0.359337	No	1
14.1333	-1.59151	0.00360677	0.165102	32642	4.51378	0.350899	No	1
14.15	-1.54573	0.00350301	0.16158	31889	4.50364	0.344868	No	1
14.1667	-1.53305	0.00347428	0.158107	31156	4.49354	0.342197	No	1
14.1833	-1.51733	0.00343864	0.15468	30440	4.48344	0.336865	No	1
14.2	-1.481	0.00335632	0.15133	29742	4.47337	0.327847	No	1
14.2167	-1.43262	0.00324668	0.148076	29060	4.4633	0.318909	No	1
14.2333	-1.39721	0.00316643	0.144901	28396	4.45326	0.31291	No	1
14.25	-1.37508	0.00311627	0.141783	27747	4.44322	0.30869	No	1
14.2667	-1.35554	0.00307198	0.138707	27115	4.43321	0.305531	No	1
14.2833	-1.34286	0.00304326	0.135677	26497	4.4232	0.300393	No	1
14.3	-1.30593	0.00295955	0.132711	25895	4.41322	0.29363	No	1
14.3167	-1.27906	0.00289867	0.129811	25307	4.40324	0.288236	No	1
14.3333	-1.25433	0.00284263	0.126965	24734	4.39329	0.283627	No	1
14.35	-1.23449	0.00279765	0.124169	24175	4.38337	0.279232	No	1
14.3667	-1.21174	0.00274611	0.121426	23629	4.37345	0.27383	No	1
14.3833	-1.1832	0.00268142	0.118746	23096	4.36354	0.267294	No	1
14.4	-1.15069	0.00260774	0.11613	22576	4.35365	0.262033	No	1
14.4167	-1.13343	0.00256864	0.113569	22069	4.34378	0.256896	No	1
14.4333	-1.10214	0.00249773	0.11106	21574	4.33393	0.25234	No	1
14.45	-1.09008	0.00247039	0.108589	21091	4.3241	0.25004	No	1
14.4667	-1.07847	0.00244409	0.106157	20619	4.31427	0.245212	No	1
14.4833	-1.04459	0.0023673	0.103789	20159	4.30447	0.237968	No	1
14.5	-1.01223	0.00229397	0.101479	19710	4.29469	0.234059	No	1
14.5167	-1.00734	0.00228288	0.099198	19271	4.2849	0.232813	No	1
14.5333	-0.998021	0.00226176	0.0969486	18843	4.27515	0.228456	No	1
14.55	-0.966425	0.00219016	0.0947636	18425	4.26541	0.22037	No	1
14.5667	-0.925217	0.00209677	0.0926523	18018	4.25571	0.214089	No	1
14.5833	-0.909338	0.00206079	0.0905872	17620	4.24601	0.211568	No	1
14.6	-0.900478	0.00204071	0.0885524	17231	4.23631	0.208591	No	1
14.6167	-0.880785	0.00199608	0.0865481	16852	4.22665	0.205978	No	1
14.6333	-0.87513	0.00198326	0.0845722	16481	4.21698	0.203428	No	1
14.65	-0.856046	0.00194001	0.0826335	16120	4.20737	0.198964	No	1
14.6667	-0.834217	0.00189054	0.0807404	15766	4.19772	0.194645	No	1
14.6833	-0.816507	0.00185041	0.0788867	15422	4.18814	0.191445	No	1
14.7	-0.80429	0.00182272	0.0770722	15085	4.17855	0.187114	No	1
14.7167	-0.77712	0.00176115	0.0753075	14756	4.16897	0.181699	No	1
14.7333	-0.7559	0.00171306	0.0735856	14435	4.15942	0.178782	No	1
14.75	-0.74994	0.00169955	0.0718809	14122	4.1499	0.178702	No	1
14.7667	-0.752677	0.00170575	0.0701828	13815	4.14035	0.178002	No	1
14.7833	-0.741528	0.00168049	0.0685019	13516	4.13085	0.175677	No	1
14.8	-0.730685	0.00165591	0.0668475	13224	4.12136	0.173013	No	1
14.8167	-0.716789	0.00162442	0.0652161	12939	4.1119	0.171398	No	1
14.8333	-0.714796	0.00161991	0.0635995	12660	4.10243	0.17047	No	1
14.85	-0.706699	0.00160156	0.0620066	12388	4.093	0.166934	No	1
14.8667	-0.683038	0.00154793	0.0604581	12122	4.08357	0.161584	No	1
14.8833	-0.659988	0.0014957	0.0589565	11862	4.07416	0.157501	No	1
14.9	-0.647008	0.00146628	0.0574894	11608	4.06476	0.154747	No	1
14.9167	-0.635097	0.00143929	0.0560549	11360	4.05538	0.151058	No	1
14.9333	-0.614488	0.00139258	0.054653	11118	4.04603	0.14826	No	1
14.95	-0.610053	0.00138253	0.0532762	10881	4.03667	0.146153	No	1
14.9667	-0.595242	0.00134897	0.0519269	10649	4.02731	0.142794	No	1
14.9833	-0.580584	0.00131575	0.050601	10423	4.01799	0.141594	No	1
15	-0.583626	0.00132264	0.0492848	10202	4.00869	0.141129	No	1
15.0167	-0.575072	0.00130326	0.0479887	9986	3.99939	0.137663	No	1
15.0333	-0.553547	0.00125448	0.0467232	9775	3.99012	0.134947	No	1
15.05	-0.551249	0.00124927	0.0454632	9568	3.98082	0.136849	No	1
15.0667	-0.567566	0.00128625	0.0441914	9366	3.97155	0.137873	No	1
15.0833	-0.558096	0.00126478	0.0429246	9169	3.96232	0.136125	No	1
15.1	-0.55183	0.00125058	0.041675	8976	3.95308	0.134519	No	1
15.1167	-0.54358	0.00123189	0.040449	8788	3.94389	0.131365	No	1
15.1333	-0.524802	0.00118933	0.0392607	8603	3.93465	0.12664	No	1
15.15	-0.503888	0.00114194	0.0381222	8423	3.92547	0.120864	No	1
15.1667	-0.476718	0.00108036	0.037026	8246	3.91624	0.117706	No	1
15.1833	-0.477166	0.00108138	0.0359522	8074	3.90709	0.116271	No	1
15.2	-0.464034	0.00105162	0.0348963	7905	3.8979	0.114054	No	1
15.2167	-0.458226	0.00103845	0.0338648	7740	3.88874	0.111185	No	1
15.2333	-0.439905	0.000996935	0.0328652	7579	3.87961	0.107323	No	1
15.25	-0.426163	0.000965791	0.0318916	7421	3.87046	0.105681	No	1
15.2667	-0.425848	0.000965078	0.0309302	7267	3.86136	0.104884	No	1
15.2833	-0.418972	0.000949494	0.0299873	7116	3.85224	0.101787	No	1
15.3	-0.400194	0.000906939	0.0290755	6968	3.84311	0.098243	No	1
15.3167	-0.389808	0.000883402	0.0281877	6823	3.83398	0.0966636	No	1
15.3333	-0.386899	0.00087681	0.0273096	6682	3.82491	0.0962741	No	1
15.35	-0.386127	0.000875059	0.0264503	6543	3.81578	0.0926463	No	1
15.3667	-0.357278	0.000809681	0.0256286	6408	3.80672	0.0881336	No	1
15.3833	-0.349486	0.000792023	0.0248324	6275	3.79761	0.0871519	No	1
15.4	-0.349019	0.000790964	0.0240444	6145	3.78852	0.0863928	No	1
15.4167	-0.343058	0.000777455	0.0232644	6018	3.77945	0.0854946	No	1
15.4333	-0.341523	0.000773975	0.0224861	5894	3.77041	0.0860585	No	1
15.45	-0.347311	0.000787094	0.0217177	5772	3.76133	0.0833948	No	1
15.4667	-0.319988	0.000725173	0.0209823	5653	3.75228	0.0788169	No	1
15.4833	-0.310518	0.000703712	0.020279	5536	3.7432	0.0763496	No	1
15.5	-0.300133	0.000680175	0.0195977	5422	3.73416	0.0740101	No	1
15.5167	-0.291731	0.000661134	0.018929	5310	3.72509	0.0735543	No	1
15.5333	-0.296451	0.000671832	0.0182644	5200	3.716	0.0731317	No	1
15.55	-0.288354	0.000653483	0.0176117	5093	3.70697	0.0709104	No	1
15.5667	-0.278732	0.000631675	0.0169733	4987	3.69784	0.0699628	No	1
15.5833	-0.280858	0.000636494	0.0163533	4884	3.68878	0.066817	No	1
15.6	-0.253688	0.00057492	0.0157638	4783	3.6797	0.0631912	No	1
15.6167	-0.252	0.000571094	0.0151923	4685	3.67071	0.0628224	No	1
15.6333	-0.250922	0.000568651	0.0146311	4588	3.66162	0.0608868	No	1
15.65	-0.236722	0.00053647	0.0140975	4493	3.65254	0.0566633	No	1
15.6667	-0.217333	0.000492531	0.0135871	4400	3.64345	0.0557132	No	1
15.6833	-0.229378	0.000519828	0.013074	4309	3.63438	0.057175	No	1
15.7	-0.229368	0.000519806	0.0125618	4219	3.62521	0.0554375	No	1
15.7167	-0.215778	0.000489007	0.0120664	4132	3.61616	0.0533943	No	1
15.7333	-0.213327	0.000483452	0.0115917	4046	3.60703	0.050819	No	1
15.75	-0.195465	0.000442972	0.0111501	3962	3.59791	0.0460083	No	1
15.7667	-0.175008	0.000396612	0.0107382	3880	3.58883	0.0442134	No	1
15.7833	-0.181407	0.000411114	0.0103238	3799	3.57967	0.0464645	No	1
15.8	-0.193605	0.000438756	0.00990018	3719	3.57043	0.0461	No	1
15.8167	-0.178947	0.000405537	0.00949191	3642	3.56134	0.0429982	No	1
15.8333	-0.169019	0.000383038	0.00909689	3566	3.55218	0.0430831	No	1
15.85	-0.180148	0.00040826	0.00868806	3491	3.54295	0.0458704	No	1
15.8667	-0.192193	0.000435556	0.00826222	3418	3.53377	0.0466362	No	1
15.8833	-0.186995	0.000423777	0.00784228	3346	3.52453	0.0444348	No	1
15.9	-0.174931	0.000396437	0.00744104	3276	3.51534	0.0424238	No	1
15.9167	-0.171259	0.000388116	0.00704856	3206	3.50596	0.0423757	No	1
15.9333	-0.175217	0.000397084	0.0066554	3139	3.49679	0.042398	No	1
15.95	-0.172155	0.000390146	0.00627065	3072	3.48742	0.04039	No	1
15.9667	-0.159481	0.000361423	0.00591221	3007	3.47813	0.0365695	No	1
15.9833	-0.141466	0.000320596	0.00557394	2943	3.46879	0.0358888	No	1
16	-0.154579	0.000350313	0.00524381	2880	3.45939	0.0346539	No	1
16.0167	-0.131986	0.000299113	0.00493982	2819	3.4501	0.0301453	No	1
16.0333	-0.117938	0.000267277	0.00465954	2758	3.44059	0.0294381	No	1
16.05	-0.126779	0.000287312	0.00438871	2699	3.4312	0.027981	No	1
16.0667	-0.106475	0.000241298	0.00412706	2641	3.42177	0.027332	No	1
16.0833	-0.122029	0.000276548	0.00386475	2584	3.41229	0.0279574	No	1
16.1	-0.112406	0.00025474	0.00361559	2528	3.40278	0.0244035	No	1
16.1167	-0.0928653	0.000210456	0.00339275	2473	3.39322	0.0222794	No	1
16.1333	-0.0951444	0.000215621	0.00317892	2419	3.38364	0.0223652	No	1
16.15	-0.0942192	0.000213524	0.00296865	2366	3.37401	0.021388	No	1
16.1667	-0.0874957	0.000198287	0.00276446	2314	3.36436	0.0209519	No	1
16.1833	-0.0911481	0.000206564	0.00255588	2263	3.35468	0.0221389	No	1
16.2	-0.09831	0.000222795	0.00234153	2213	3.34498	0.0219821	No	1
16.2167	-0.0905184	0.000205137	0.00213974	2164	3.33526	0.0193995	No	1
16.2333	-0.0767758	0.000173993	0.00194247	2116	3.32552	0.0208882	No	1
16.25	-0.104079	0.00023587	0.00171893	2068	3.31555	0.0245736	No	1
16.2667	-0.109563	0.000248297	0.0014751	2022	3.30578	0.024817	No	1
16.2833	-0.107112	0.000242742	0.00123787	1976	3.29579	0.0230366	No	1
16.3	-0.094895	0.000215056	0.00101863	1931	3.28578	0.0209916	No	1
16.3167	-0.0900025	0.000203968	0.000818271	1887	3.27577	0.0190656	No	1
16.3333	-0.0787013	0.000178357	0.000629344	1844	3.26576	0.0185279	No	1
16.35	-0.0860159	0.000194933	0.000440352	1802	3.25575	0.0188981	No	1
16.3667	-0.0828018	0.00018765	0.000256138	1760	3.24551	0.0174093	No	1
16.3833	-0.0734843	0.000166534	8.37904e-05	1719	3.23528	0.0163895	No	1
