# Supplementary material for: Descriptive study and evaluation of shrink hoods with recycled content for regulatory compliance
Source: Research Square preprint supplement (doi:10.21203/rs.3.rs-6261320/v1), 2025-06-25
Supplement: Supplementary file 4 [file a7e2e4c31651919116d8ad17.xlsx]

## Sheet: Sample Details
Administrative Information
Export date	10 December 2024 09:43:20
Culture name	en-GB
Decimal separator	.
Workspace name	November 2024
Workspace path	C:\ProgramData\Agilent Technologies\GPC\Workspaces\2024\November 2024\
File name	ICF_04_12_2024-0011.sample
Creation date	09 December 2024 12:42:46
Created by	OBPC
Comments	Collected by Agilent GPC/SEC Software Version 2.1.9.34851
Software version	Agilent SEC Software - 2.1.9.34851
Sample Information
Sample name	H
Information
Sample type	Sample
Injection date	09 December 2024
Vial number	None
Injection number	1
Injection volume (µL)	200
Concentration (mg/mL)	1
dn/dc (mL/g)	0.1
UV extinction coefficient [(mg/mL)-¹][cm-¹]	1
Mp (g/mol)	100000
IV (dL/g)	0.5
Mark-Houwink K ((10e-5) dL/g)	14.1
Mark-Houwink Alpha	0.7
Analysed	Yes
Sample Instrument Conditions
Eluent
Eluent refractive index	1
Set flow rate (mL/min)	1
LS wavelength (nm)	650
Laser power (%)	0
Set detector temperature (°C)	0
Actual detector temperature (°C)	0
Actual flow rate (mL/min)	0
Column information
Data origin	Collected by Agilent GPC/SEC Software Version 2.1.9.34851
Instrument name	Agilent DataStream
Sample Collection Parameters
Collected by	OBPC
Number of channels	1
Run length (mins)	30.0167
Delay time (secs)	0
Sampling interval (secs)	1
Number of data points	1801
Sample DLS Parameters
Eluent refractive index	1
Eluent viscosity (P)	0.0089
DLS correlator run time (secs)	5
DLS Clip Time (µs)	100
DLS R²	0.4
Sample Channel Information
Channel ID	Detector type	Detector name	Detector units	Channel Information
1	RI	Trace0	mV

## Sheet: Raw Data
Sample Collection Parameters
Collected by	OBPC
Number of channels	1
Run length (mins)	30.0167
Delay time (secs)	0
Sampling interval (secs)	1
Number of data points	1801
Sample DLS Parameters
Eluent refractive index	1
Eluent viscosity (P)	0.0089
DLS correlator run time (secs)	5
DLS Clip Time (µs)	100
DLS R²	0.4
Sample Channel Information
Channel ID	Detector type	Detector name	Detector units	Channel Information
1	RI	Trace0	mV
Raw Data
RT (mins)	Response Trace 1
0	-2.25112
0.0166667	-2.16347
0.0333333	-2.19734
0.05	-2.18071
0.0666667	-2.15706
0.0833333	-2.14684
0.1	-2.14851
0.116667	-2.13905
0.133333	-2.16011
0.15	-2.14409
0.166667	-2.15172
0.183333	-2.14134
0.2	-2.11662
0.216667	-2.11739
0.233333	-2.12318
0.25	-2.11479
0.266667	-2.11479
0.283333	-2.1154
0.3	-2.11327
0.316667	-2.12441
0.333333	-2.12105
0.35	-2.13539
0.366667	-2.12608
0.383333	-2.11464
0.4	-2.11571
0.416667	-2.11937
0.433333	-2.11571
0.45	-2.12074
0.466667	-2.12746
0.483333	-2.14424
0.5	-2.15324
0.516667	-2.1328
0.533333	-2.13417
0.55	-2.13417
0.566667	-2.12135
0.583333	-2.12334
0.6	-2.12379
0.616667	-2.12196
0.633333	-2.14973
0.65	-2.17522
0.666667	-2.19032
0.683333	-2.19826
0.7	-2.1859
0.716667	-2.1804
0.733333	-2.17796
0.75	-2.18712
0.766667	-2.18819
0.783333	-2.16743
0.8	-2.1653
0.816667	-2.16209
0.833333	-2.14272
0.85	-2.14088
0.866667	-2.14226
0.883333	-2.14531
0.9	-2.14256
0.916667	-2.14409
0.933333	-2.1357
0.95	-2.14195
0.966667	-2.15492
0.983333	-2.15752
1	-2.15309
1.01667	-2.16347
1.03333	-2.16057
1.05	-2.16209
1.06667	-2.17247
1.08333	-2.16057
1.1	-2.15721
1.11667	-2.15858
1.13333	-2.16713
1.15	-2.16347
1.16667	-2.15553
1.18333	-2.15477
1.2	-2.14363
1.21667	-2.15309
1.23333	-2.16286
1.25	-2.15691
1.26667	-2.16331
1.28333	-2.16362
1.3	-2.16896
1.31667	-2.16423
1.33333	-2.16057
1.35	-2.17293
1.36667	-2.17262
1.38333	-2.16957
1.4	-2.15797
1.41667	-2.15904
1.43333	-2.17201
1.45	-2.15187
1.46667	-2.1386
1.48333	-2.1505
1.5	-2.14485
1.51667	-2.1299
1.53333	-2.13448
1.55	-2.14165
1.56667	-2.15492
1.58333	-2.15843
1.6	-2.15019
1.61667	-2.15401
1.63333	-2.15065
1.65	-2.14287
1.66667	-2.15996
1.68333	-2.14897
1.7	-2.145
1.71667	-2.16545
1.73333	-2.16454
1.75	-2.1653
1.76667	-2.17064
1.78333	-2.1714
1.8	-2.16972
1.81667	-2.16667
1.83333	-2.15889
1.85	-2.16621
1.86667	-2.16743
1.88333	-2.16423
1.9	-2.16835
1.91667	-2.16698
1.93333	-2.15492
1.95	-2.16042
1.96667	-2.17369
1.98333	-2.17247
2	-2.16942
2.01667	-2.1563
2.03333	-2.15065
2.05	-2.15996
2.06667	-2.15096
2.08333	-2.15904
2.1	-2.17339
2.11667	-2.17079
2.13333	-2.16454
2.15	-2.1714
2.16667	-2.16728
2.18333	-2.15523
2.2	-2.15431
2.21667	-2.15584
2.23333	-2.15996
2.25	-2.16484
2.26667	-2.16011
2.28333	-2.15782
2.3	-2.14363
2.31667	-2.1418
2.33333	-2.15508
2.35	-2.15843
2.36667	-2.1592
2.38333	-2.17308
2.4	-2.15767
2.41667	-2.15614
2.43333	-2.14989
2.45	-2.14928
2.46667	-2.14531
2.48333	-2.14806
2.5	-2.14943
2.51667	-2.14638
2.53333	-2.15996
2.55	-2.15645
2.56667	-2.1328
2.58333	-2.1331
2.6	-2.13707
2.61667	-2.14165
2.63333	-2.1331
2.65	-2.12471
2.66667	-2.14439
2.68333	-2.14729
2.7	-2.13554
2.71667	-2.12044
2.73333	-2.12563
2.75	-2.13936
2.76667	-2.11876
2.78333	-2.11983
2.8	-2.11845
2.81667	-2.12517
2.83333	-2.12074
2.85	-2.13066
2.86667	-2.12746
2.88333	-2.11998
2.9	-2.12441
2.91667	-2.12242
2.93333	-2.13127
2.95	-2.136
2.96667	-2.12181
2.98333	-2.12776
3	-2.1386
3.01667	-2.14027
3.03333	-2.13448
3.05	-2.13081
3.06667	-2.13219
3.08333	-2.12379
3.1	-2.12059
3.11667	-2.13188
3.13333	-2.13661
3.15	-2.14104
3.16667	-2.14272
3.18333	-2.13768
3.2	-2.15096
3.21667	-2.14989
3.23333	-2.13722
3.25	-2.14623
3.26667	-2.13112
3.28333	-2.12181
3.3	-2.11769
3.31667	-2.11006
3.33333	-2.12776
3.35	-2.14058
3.36667	-2.14211
3.38333	-2.14623
3.4	-2.13554
3.41667	-2.15385
3.43333	-2.13493
3.45	-2.14394
3.46667	-2.14027
3.48333	-2.12868
3.5	-2.13005
3.51667	-2.1386
3.53333	-2.13554
3.55	-2.14317
3.56667	-2.13371
3.58333	-2.13966
3.6	-2.15309
3.61667	-2.15645
3.63333	-2.15263
3.65	-2.14745
3.66667	-2.14363
3.68333	-2.14546
3.7	-2.1447
3.71667	-2.14333
3.73333	-2.1476
3.75	-2.15904
3.76667	-2.15965
3.78333	-2.14149
3.8	-2.11052
3.81667	-2.11861
3.83333	-2.13478
3.85	-2.13814
3.86667	-2.14668
3.88333	-2.12517
3.9	-2.12379
3.91667	-2.11662
3.93333	-2.11342
3.95	-2.12151
3.96667	-2.12349
3.98333	-2.12791
4	-2.136
4.01667	-2.11601
4.03333	-2.12471
4.05	-2.12944
4.06667	-2.13905
4.08333	-2.14195
4.1	-2.15065
4.11667	-2.15157
4.13333	-2.15248
4.15	-2.14989
4.16667	-2.15431
4.18333	-2.15782
4.2	-2.15904
4.21667	-2.17369
4.23333	-2.15431
4.25	-2.15218
4.26667	-2.14348
4.28333	-2.14714
4.3	-2.15096
4.31667	-2.15935
4.33333	-2.15858
4.35	-2.14973
4.36667	-2.15477
4.38333	-2.1534
4.4	-2.15813
4.41667	-2.15126
4.43333	-2.14058
4.45	-2.14623
4.46667	-2.15385
4.48333	-2.16026
4.5	-2.15645
4.51667	-2.14592
4.53333	-2.1331
4.55	-2.13692
4.56667	-2.13753
4.58333	-2.14149
4.6	-2.136
4.61667	-2.15538
4.63333	-2.15462
4.65	-2.14531
4.66667	-2.15446
4.68333	-2.15675
4.7	-2.1627
4.71667	-2.15355
4.73333	-2.15492
4.75	-2.1537
4.76667	-2.14912
4.78333	-2.15309
4.8	-2.14973
4.81667	-2.13676
4.83333	-2.14867
4.85	-2.16454
4.86667	-2.15309
4.88333	-2.1682
4.9	-2.1769
4.91667	-2.16469
4.93333	-2.16576
4.95	-2.16026
4.96667	-2.17445
4.98333	-2.17628
5	-2.17293
5.01667	-2.16743
5.03333	-2.16881
5.05	-2.17064
5.06667	-2.17812
5.08333	-2.18773
5.1	-2.17796
5.11667	-2.17995
5.13333	-2.17918
5.15	-2.17613
5.16667	-2.17217
5.18333	-2.1804
5.2	-2.15858
5.21667	-2.19124
5.23333	-2.19933
5.25	-2.18834
5.26667	-2.19002
5.28333	-2.18056
5.3	-2.1917
5.31667	-2.19215
5.33333	-2.18925
5.35	-2.17995
5.36667	-2.16652
5.38333	-2.18193
5.4	-2.17628
5.41667	-2.16988
5.43333	-2.18925
5.45	-2.18132
5.46667	-2.1685
5.48333	-2.17995
5.5	-2.18025
5.51667	-2.16194
5.53333	-2.16606
5.55	-2.16362
5.56667	-2.15736
5.58333	-2.17049
5.6	-2.17567
5.61667	-2.16866
5.63333	-2.18437
5.65	-2.17949
5.66667	-2.17049
5.68333	-2.16911
5.7	-2.16896
5.71667	-2.17232
5.73333	-2.17125
5.75	-2.17812
5.76667	-2.18361
5.78333	-2.18102
5.8	-2.17873
5.81667	-2.18086
5.83333	-2.18452
5.85	-2.19841
5.86667	-2.19017
5.88333	-2.19414
5.9	-2.17323
5.91667	-2.1891
5.93333	-2.19154
5.95	-2.18666
5.96667	-2.18178
5.98333	-2.17369
6	-2.17476
6.01667	-2.19734
6.03333	-2.18834
6.05	-2.17415
6.06667	-2.16972
6.08333	-2.17934
6.1	-2.18269
6.11667	-2.17552
6.13333	-2.1595
6.15	-2.1743
6.16667	-2.18971
6.18333	-2.18315
6.2	-2.17262
6.21667	-2.16667
6.23333	-2.17537
6.25	-2.17812
6.26667	-2.18468
6.28333	-2.20558
6.3	-2.18163
6.31667	-2.16774
6.33333	-2.18102
6.35	-2.19399
6.36667	-2.20772
6.38333	-2.20955
6.4	-2.18605
6.41667	-2.19749
6.43333	-2.19948
6.45	-2.20512
6.46667	-2.19963
6.48333	-2.20329
6.5	-2.20711
6.51667	-2.21245
6.53333	-2.21428
6.55	-2.19399
6.56667	-2.19612
6.58333	-2.20406
6.6	-2.21443
6.61667	-2.23045
6.63333	-2.22115
6.65	-2.2123
6.66667	-2.21397
6.68333	-2.21016
6.7	-2.21382
6.71667	-2.2039
6.73333	-2.21428
6.75	-2.21474
6.76667	-2.20711
6.78333	-2.20421
6.8	-2.20253
6.81667	-2.20512
6.83333	-2.201
6.85	-2.21245
6.86667	-2.21062
6.88333	-2.2187
6.9	-2.22862
6.91667	-2.23167
6.93333	-2.22771
6.95	-2.21382
6.96667	-2.20299
6.98333	-2.20314
7	-2.20085
7.01667	-2.2068
7.03333	-2.2123
7.05	-2.21077
7.06667	-2.20726
7.08333	-2.2213
7.1	-2.22267
7.11667	-2.21764
7.13333	-2.22328
7.15	-2.23274
7.16667	-2.24052
7.18333	-2.23885
7.2	-2.2506
7.21667	-2.23076
7.23333	-2.23259
7.25	-2.24342
7.26667	-2.23534
7.28333	-2.23763
7.3	-2.23167
7.31667	-2.22923
7.33333	-2.21352
7.35	-2.2187
7.36667	-2.20345
7.38333	-2.20284
7.4	-2.18925
7.41667	-2.19246
7.43333	-2.20131
7.45	-2.20146
7.46667	-2.21748
7.48333	-2.20818
7.5	-2.20131
7.51667	-2.19597
7.53333	-2.19963
7.55	-2.20024
7.56667	-2.20146
7.58333	-2.18651
7.6	-2.19231
7.61667	-2.20696
7.63333	-2.19582
7.65	-2.20375
7.66667	-2.20222
7.68333	-2.20604
7.7	-2.19887
7.71667	-2.19948
7.73333	-2.20543
7.75	-2.2068
7.76667	-2.20299
7.78333	-2.21489
7.8	-2.21596
7.81667	-2.23137
7.83333	-2.21794
7.85	-2.22191
7.86667	-2.22801
7.88333	-2.22481
7.9	-2.21764
7.91667	-2.19658
7.93333	-2.20146
7.95	-2.21687
7.96667	-2.20573
7.98333	-2.21962
8	-2.19688
8.01667	-2.20543
8.03333	-2.2007
8.05	-2.19826
8.06667	-2.20985
8.08333	-2.2094
8.1	-2.20146
8.11667	-2.19719
8.13333	-2.1801
8.15	-2.18758
8.16667	-2.20009
8.18333	-2.2068
8.2	-2.19795
8.21667	-2.183
8.23333	-2.19994
8.25	-2.1981
8.26667	-2.20024
8.28333	-2.18834
8.3	-2.2036
8.31667	-2.21397
8.33333	-2.21031
8.35	-2.20497
8.36667	-2.20436
8.38333	-2.21046
8.4	-2.22374
8.41667	-2.21977
8.43333	-2.20634
8.45	-2.22328
8.46667	-2.22282
8.48333	-2.21138
8.5	-2.21352
8.51667	-2.21352
8.53333	-2.22466
8.55	-2.23442
8.56667	-2.22328
8.58333	-2.2123
8.6	-2.21611
8.61667	-2.21352
8.63333	-2.2123
8.65	-2.22496
8.66667	-2.23595
8.68333	-2.22206
8.7	-2.21672
8.71667	-2.21718
8.73333	-2.22542
8.75	-2.2274
8.76667	-2.23076
8.78333	-2.21504
8.8	-2.2123
8.81667	-2.23122
8.83333	-2.23732
8.85	-2.24907
8.86667	-2.22771
8.88333	-2.23045
8.9	-2.22862
8.91667	-2.23274
8.93333	-2.24068
8.95	-2.23991
8.96667	-2.23595
8.98333	-2.23793
9	-2.23213
9.01667	-2.24022
9.03333	-2.23244
9.05	-2.24052
9.06667	-2.23473
9.08333	-2.23351
9.1	-2.22893
9.11667	-2.24052
9.13333	-2.24617
9.15	-2.23412
9.16667	-2.23045
9.18333	-2.24617
9.2	-2.23381
9.21667	-2.24205
9.23333	-2.23228
9.25	-2.22511
9.26667	-2.23686
9.28333	-2.24083
9.3	-2.22862
9.31667	-2.22603
9.33333	-2.2274
9.35	-2.24693
9.36667	-2.23274
9.38333	-2.2332
9.4	-2.22542
9.41667	-2.21855
9.43333	-2.21474
9.45	-2.20467
9.46667	-2.23137
9.48333	-2.21764
9.5	-2.20329
9.51667	-2.20802
9.53333	-2.19872
9.55	-2.19246
9.56667	-2.18834
9.58333	-2.20116
9.6	-2.22115
9.61667	-2.21962
9.63333	-2.22649
9.65	-2.22145
9.66667	-2.2184
9.68333	-2.2274
9.7	-2.22343
9.71667	-2.23244
9.73333	-2.22923
9.75	-2.22923
9.76667	-2.22603
9.78333	-2.23564
9.8	-2.2332
9.81667	-2.24587
9.83333	-2.25716
9.85	-2.24937
9.86667	-2.25121
9.88333	-2.26631
9.9	-2.26479
9.91667	-2.25945
9.93333	-2.2567
9.95	-2.25487
9.96667	-2.25456
9.98333	-2.24907
10	-2.24205
10.0167	-2.24556
10.0333	-2.24663
10.05	-2.25639
10.0667	-2.24861
10.0833	-2.24541
10.1	-2.26143
10.1167	-2.26723
10.1333	-2.27104
10.15	-2.28203
10.1667	-2.2747
10.1833	-2.28462
10.2	-2.27501
10.2167	-2.28157
10.2333	-2.26936
10.25	-2.26173
10.2667	-2.26967
10.2833	-2.25273
10.3	-2.25548
10.3167	-2.26494
10.3333	-2.28798
10.35	-2.29073
10.3667	-2.29256
10.3833	-2.31407
10.4	-2.30293
10.4167	-2.30476
10.4333	-2.31789
10.45	-2.31926
10.4667	-2.32506
10.4833	-2.32597
10.5	-2.32948
10.5167	-2.33635
10.5333	-2.33681
10.55	-2.31956
10.5667	-2.32628
10.5833	-2.34673
10.6	-2.34184
10.6167	-2.34398
10.6333	-2.33559
10.65	-2.3452
10.6667	-2.33223
10.6833	-2.35435
10.7	-2.3597
10.7167	-2.37312
10.7333	-2.37694
10.75	-2.38792
10.7667	-2.38792
10.7833	-2.38518
10.8	-2.38747
10.8167	-2.39998
10.8333	-2.41188
10.85	-2.40822
10.8667	-2.43294
10.8833	-2.43477
10.9	-2.4305
10.9167	-2.44041
10.9333	-2.44804
10.95	-2.45949
10.9667	-2.4662
10.9833	-2.47093
11	-2.47307
11.0167	-2.48405
11.0333	-2.50771
11.05	-2.49886
11.0667	-2.5013
11.0833	-2.52419
11.1	-2.53609
11.1167	-2.5251
11.1333	-2.55074
11.15	-2.54692
11.1667	-2.57652
11.1833	-2.5843
11.2	-2.59865
11.2167	-2.62947
11.2333	-2.64381
11.25	-2.65312
11.2667	-2.68654
11.2833	-2.69722
11.3	-2.73399
11.3167	-2.752
11.3333	-2.77046
11.35	-2.78999
11.3667	-2.82127
11.3833	-2.84203
11.4	-2.86934
11.4167	-2.91832
11.4333	-2.95464
11.45	-2.99492
11.4667	-3.03551
11.4833	-3.06892
11.5	-3.11104
11.5167	-3.14796
11.5333	-3.18443
11.55	-3.21297
11.5667	-3.2476
11.5833	-3.3094
11.6	-3.35915
11.6167	-3.41805
11.6333	-3.4687
11.65	-3.50929
11.6667	-3.56651
11.6833	-3.61031
11.7	-3.6573
11.7167	-3.68675
11.7333	-3.77434
11.75	-3.83476
11.7667	-3.86726
11.7833	-3.91762
11.8	-3.96538
11.8167	-4.01085
11.8333	-4.05586
11.85	-4.1114
11.8667	-4.15947
11.8833	-4.2083
11.9	-4.25102
11.9167	-4.32182
11.9333	-4.38545
11.95	-4.40697
11.9667	-4.44878
11.9833	-4.50295
12	-4.54292
12.0167	-4.59358
12.0333	-4.63951
12.05	-4.6743
12.0667	-4.71947
12.0833	-4.77547
12.1	-4.81316
12.1167	-4.85893
12.1333	-4.90593
12.15	-4.94072
12.1667	-4.98192
12.1833	-5.037
12.2	-5.0901
12.2167	-5.13756
12.2333	-5.17601
12.25	-5.22072
12.2667	-5.26665
12.2833	-5.32494
12.3	-5.36613
12.3167	-5.42091
12.3333	-5.48073
12.35	-5.51521
12.3667	-5.55992
12.3833	-5.59593
12.4	-5.63133
12.4167	-5.68306
12.4333	-5.73769
12.45	-5.78362
12.4667	-5.81306
12.4833	-5.83336
12.5	-5.8889
12.5167	-5.95009
12.5333	-5.99785
12.55	-6.02547
12.5667	-6.05797
12.5833	-6.0894
12.6	-6.13075
12.6167	-6.15105
12.6333	-6.1866
12.65	-6.21422
12.6667	-6.24992
12.6833	-6.28807
12.7	-6.29952
12.7167	-6.2989
12.7333	-6.33843
12.75	-6.35445
12.7667	-6.36421
12.7833	-6.38283
12.8	-6.4048
12.8167	-6.42067
12.8333	-6.43883
12.85	-6.44157
12.8667	-6.47377
12.8833	-6.48842
12.9	-6.49498
12.9167	-6.50765
12.9333	-6.51283
12.95	-6.50566
12.9667	-6.50505
12.9833	-6.50566
13	-6.51222
13.0167	-6.50246
13.0333	-6.51726
13.05	-6.51863
13.0667	-6.50642
13.0833	-6.4843
13.1	-6.48354
13.1167	-6.49056
13.1333	-6.47835
13.15	-6.46812
13.1667	-6.4608
13.1833	-6.42937
13.2	-6.41792
13.2167	-6.4016
13.2333	-6.37703
13.25	-6.35582
13.2667	-6.34163
13.2833	-6.29921
13.3	-6.27998
13.3167	-6.25633
13.3333	-6.24382
13.35	-6.22719
13.3667	-6.19316
13.3833	-6.16158
13.4	-6.13487
13.4167	-6.11717
13.4333	-6.09291
13.45	-6.07689
13.4667	-6.04988
13.4833	-6.02806
13.5	-6.00197
13.5167	-5.97771
13.5333	-5.94872
13.55	-5.92049
13.5667	-5.89073
13.5833	-5.85701
13.6	-5.82344
13.6167	-5.8004
13.6333	-5.79231
13.65	-5.77065
13.6667	-5.7502
13.6833	-5.73006
13.7	-5.70473
13.7167	-5.68077
13.7333	-5.64903
13.75	-5.63362
13.7667	-5.61104
13.7833	-5.55473
13.8	-5.51994
13.8167	-5.49233
13.8333	-5.47524
13.85	-5.44609
13.8667	-5.41557
13.8833	-5.3727
13.9	-5.32723
13.9167	-5.28969
13.9333	-5.2459
13.95	-5.22011
13.9667	-5.17601
13.9833	-5.13969
14	-5.09254
14.0167	-5.05898
14.0333	-5.0309
14.05	-5.0071
14.0667	-4.96727
14.0833	-4.93019
14.1	-4.89586
14.1167	-4.86198
14.1333	-4.81941
14.15	-4.76921
14.1667	-4.73228
14.1833	-4.70085
14.2	-4.66545
14.2167	-4.63707
14.2333	-4.5948
14.25	-4.56184
14.2667	-4.55132
14.2833	-4.49837
14.3	-4.47243
14.3167	-4.43031
14.3333	-4.40681
14.35	-4.36073
14.3667	-4.30916
14.3833	-4.26491
14.4	-4.24461
14.4167	-4.19487
14.4333	-4.16695
14.45	-4.11186
14.4667	-4.11354
14.4833	-4.07295
14.5	-4.03923
14.5167	-3.99437
14.5333	-3.96645
14.55	-3.95256
14.5667	-3.92387
14.5833	-3.87337
14.6	-3.83583
14.6167	-3.81722
14.6333	-3.79463
14.65	-3.78029
14.6667	-3.73543
14.6833	-3.71162
14.7	-3.69972
14.7167	-3.66402
14.7333	-3.64388
14.75	-3.62679
14.7667	-3.58879
14.7833	-3.57628
14.8	-3.53493
14.8167	-3.52379
14.8333	-3.507
14.85	-3.50975
14.8667	-3.48213
14.8833	-3.44307
14.9	-3.43376
14.9167	-3.40446
14.9333	-3.34801
14.95	-3.35701
14.9667	-3.33321
14.9833	-3.31291
15	-3.29811
15.0167	-3.27461
15.0333	-3.25645
15.05	-3.22746
15.0667	-3.23204
15.0833	-3.20534
15.1	-3.17894
15.1167	-3.1678
15.1333	-3.15712
15.15	-3.1237
15.1667	-3.10112
15.1833	-3.08678
15.2	-3.06221
15.2167	-3.04451
15.2333	-3.02773
15.25	-3.01079
15.2667	-2.99919
15.2833	-2.99065
15.3	-2.97264
15.3167	-2.9554
15.3333	-2.94334
15.35	-2.91725
15.3667	-2.91817
15.3833	-2.91008
15.4	-2.91466
15.4167	-2.90291
15.4333	-2.87956
15.45	-2.87651
15.4667	-2.85957
15.4833	-2.83196
15.5	-2.81563
15.5167	-2.81639
15.5333	-2.8051
15.55	-2.77519
15.5667	-2.7906
15.5833	-2.77412
15.6	-2.75673
15.6167	-2.7343
15.6333	-2.71599
15.65	-2.71019
15.6667	-2.70241
15.6833	-2.69356
15.7	-2.70241
15.7167	-2.69066
15.7333	-2.68196
15.75	-2.66853
15.7667	-2.65663
15.7833	-2.65358
15.8	-2.66899
15.8167	-2.64427
15.8333	-2.62398
15.85	-2.62352
15.8667	-2.61086
15.8833	-2.60963
15.9	-2.60262
15.9167	-2.59911
15.9333	-2.58003
15.95	-2.57759
15.9667	-2.58537
15.9833	-2.575
16	-2.57225
16.0167	-2.56813
16.0333	-2.5753
16.05	-2.5602
16.0667	-2.56386
16.0833	-2.54097
16.1	-2.53975
16.1167	-2.54295
16.1333	-2.5312
16.15	-2.52541
16.1667	-2.50618
16.1833	-2.50069
16.2	-2.51274
16.2167	-2.51015
16.2333	-2.51534
16.25	-2.50496
16.2667	-2.51869
16.2833	-2.50649
16.3	-2.49657
16.3167	-2.50664
16.3333	-2.51808
16.35	-2.49031
16.3667	-2.49168
16.3833	-2.48055
16.4	-2.47704
16.4167	-2.48283
16.4333	-2.47612
16.45	-2.47551
16.4667	-2.45338
16.4833	-2.44652
16.5	-2.44743
16.5167	-2.43935
16.5333	-2.4276
16.55	-2.43538
16.5667	-2.43797
16.5833	-2.43843
16.6	-2.42027
16.6167	-2.42775
16.6333	-2.43095
16.65	-2.43172
16.6667	-2.43919
16.6833	-2.42165
16.7	-2.41875
16.7167	-2.42561
16.7333	-2.41508
16.75	-2.41966
16.7667	-2.40959
16.7833	-2.40379
16.8	-2.398
16.8167	-2.39738
16.8333	-2.4099
16.85	-2.4247
16.8667	-2.42577
16.8833	-2.41722
16.9	-2.43233
16.9167	-2.42592
16.9333	-2.4128
16.95	-2.42485
16.9667	-2.40608
16.9833	-2.41646
17	-2.40944
17.0167	-2.41783
17.0333	-2.39647
17.05	-2.3925
17.0667	-2.41631
17.0833	-2.41051
17.1	-2.4041
17.1167	-2.41127
17.1333	-2.41447
17.15	-2.41798
17.1667	-2.39983
17.1833	-2.4157
17.2	-2.40395
17.2167	-2.40349
17.2333	-2.42958
17.25	-2.4157
17.2667	-2.40685
17.2833	-2.4099
17.3	-2.39906
17.3167	-2.39311
17.3333	-2.39738
17.35	-2.3896
17.3667	-2.38747
17.3833	-2.39967
17.4	-2.3864
17.4167	-2.39769
17.4333	-2.39571
17.45	-2.40471
17.4667	-2.39983
17.4833	-2.38213
17.5	-2.39845
17.5167	-2.40456
17.5333	-2.39433
17.55	-2.37587
17.5667	-2.38029
17.5833	-2.37679
17.6	-2.37785
17.6167	-2.35664
17.6333	-2.36061
17.65	-2.35497
17.6667	-2.36855
17.6833	-2.36153
17.7	-2.35115
17.7167	-2.35252
17.7333	-2.36168
17.75	-2.34947
17.7667	-2.36687
17.7833	-2.36839
17.8	-2.35085
17.8167	-2.35512
17.8333	-2.36488
17.85	-2.36305
17.8667	-2.37099
17.8833	-2.3806
17.9	-2.38762
17.9167	-2.37572
17.9333	-2.37938
17.95	-2.38518
17.9667	-2.398
17.9833	-2.40273
18	-2.41615
18.0167	-2.41478
18.0333	-2.42577
18.05	-2.44286
18.0667	-2.44621
18.0833	-2.45247
18.1	-2.43431
18.1167	-2.45049
18.1333	-2.45537
18.15	-2.4575
18.1667	-2.4659
18.1833	-2.46468
18.2	-2.45018
18.2167	-2.44499
18.2333	-2.45079
18.25	-2.4482
18.2667	-2.45232
18.2833	-2.44881
18.3	-2.45659
18.3167	-2.44926
18.3333	-2.4305
18.35	-2.41341
18.3667	-2.39342
18.3833	-2.38777
18.4	-2.38441
18.4167	-2.3983
18.4333	-2.39998
18.45	-2.40456
18.4667	-2.40318
18.4833	-2.39845
18.5	-2.38518
18.5167	-2.36855
18.5333	-2.36244
18.55	-2.3835
18.5667	-2.37984
18.5833	-2.36656
18.6	-2.37816
18.6167	-2.38792
18.6333	-2.36198
18.65	-2.35344
18.6667	-2.35451
18.6833	-2.34077
18.7	-2.3481
18.7167	-2.33269
18.7333	-2.32887
18.75	-2.33253
18.7667	-2.33345
18.7833	-2.33589
18.8	-2.32414
18.8167	-2.30827
18.8333	-2.28416
18.85	-2.27379
18.8667	-2.24083
18.8833	-2.23747
18.9	-2.21733
18.9167	-2.22237
18.9333	-2.20879
18.95	-2.18132
18.9667	-2.15431
18.9833	-2.15416
19	-2.15279
19.0167	-2.13448
19.0333	-2.10106
19.05	-2.10594
19.0667	-2.0974
19.0833	-2.09419
19.1	-2.07405
19.1167	-2.06459
19.1333	-2.07054
19.15	-2.07771
19.1667	-2.05696
19.1833	-2.04094
19.2	-2.04369
19.2167	-2.04933
19.2333	-2.04628
19.25	-2.02736
19.2667	-2.01485
19.2833	-2.00844
19.3	-2.01881
19.3167	-2.00981
19.3333	-1.99409
19.35	-1.98524
19.3667	-1.97456
19.3833	-1.94893
19.4	-1.92162
19.4167	-1.89842
19.4333	-1.86378
19.45	-1.81999
19.4667	-1.75438
19.4833	-1.69395
19.5	-1.63338
19.5167	-1.57005
19.5333	-1.48399
19.55	-1.38359
19.5667	-1.29387
19.5833	-1.18019
19.6	-1.0659
19.6167	-0.946579
19.6333	-0.831375
19.65	-0.706253
19.6667	-0.58342
19.6833	-0.452957
19.7	-0.361099
19.7167	-0.281601
19.7333	-0.223618
19.75	-0.174484
19.7667	-0.133743
19.7833	-0.120926
19.8	-0.157242
19.8167	-0.183334
19.8333	-0.243454
19.85	-0.312271
19.8667	-0.378647
19.8833	-0.455399
19.9	-0.566177
19.9167	-0.655594
19.9333	-0.763016
19.95	-0.849381
19.9667	-0.940628
19.9833	-1.04897
20	-1.1248
20.0167	-1.2104
20.0333	-1.28807
20.05	-1.36879
20.0667	-1.45744
20.0833	-1.51909
20.1	-1.58348
20.1167	-1.65489
20.1333	-1.72035
20.15	-1.81328
20.1667	-1.8856
20.1833	-1.968
20.2	-2.08015
20.2167	-2.16713
20.2333	-2.30812
20.25	-2.46056
20.2667	-2.64275
20.2833	-2.84569
20.3	-3.09898
20.3167	-3.38814
20.3333	-3.69896
20.35	-4.06685
20.3667	-4.47655
20.3833	-4.93034
20.4	-5.42809
20.4167	-5.93498
20.4333	-6.51543
20.45	-7.10884
20.4667	-7.75917
20.4833	-8.39699
20.5	-9.03481
20.5167	-9.66438
20.5333	-10.2914
20.55	-10.8833
20.5667	-11.4091
20.5833	-11.8945
20.6	-12.3199
20.6167	-12.6936
20.6333	-13.0019
20.65	-13.207
20.6667	-13.3346
20.6833	-13.42
20.7	-13.4043
20.7167	-13.3564
20.7333	-13.2394
20.75	-13.0523
20.7667	-12.8426
20.7833	-12.6096
20.8	-12.326
20.8167	-12.0612
20.8333	-11.769
20.85	-11.4938
20.8667	-11.1932
20.8833	-10.9049
20.9	-10.6161
20.9167	-10.355
20.9333	-10.1086
20.95	-9.87389
20.9667	-9.63188
20.9833	-9.40498
21	-9.19533
21.0167	-8.96339
21.0333	-8.75572
21.05	-8.55583
21.0667	-8.3596
21.0833	-8.1678
21.1	-7.97325
21.1167	-7.77565
21.1333	-7.55699
21.15	-7.35222
21.1667	-7.16805
21.1833	-6.97319
21.2	-6.74049
21.2167	-6.53664
21.2333	-6.37199
21.25	-6.17058
21.2667	-5.97038
21.2833	-5.79445
21.3	-5.63423
21.3167	-5.46471
21.3333	-5.3138
21.35	-5.15602
21.3667	-5.02007
21.3833	-4.88594
21.4	-4.76601
21.4167	-4.66393
21.4333	-4.5417
21.45	-4.43108
21.4667	-4.34486
21.4833	-4.2466
21.5	-4.161
21.5167	-4.09843
21.5333	-4.02245
21.55	-3.94875
21.5667	-3.87993
21.5833	-3.81905
21.6	-3.76289
21.6167	-3.71895
21.6333	-3.6602
21.65	-3.61809
21.6667	-3.5833
21.6833	-3.53844
21.7	-3.48534
21.7167	-3.44704
21.7333	-3.39912
21.75	-3.36311
21.7667	-3.32558
21.7833	-3.29857
21.8	-3.27385
21.8167	-3.24791
21.8333	-3.22258
21.85	-3.2003
21.8667	-3.17619
21.8833	-3.13652
21.9	-3.11501
21.9167	-3.09227
21.9333	-3.06374
21.95	-3.05061
21.9667	-3.03215
21.9833	-3.00682
22	-2.99339
22.0167	-2.98485
22.0333	-2.95158
22.05	-2.93022
22.0667	-2.91801
22.0833	-2.90306
22.1	-2.90596
22.1167	-2.89665
22.1333	-2.89177
22.15	-2.88658
22.1667	-2.85255
22.1833	-2.85774
22.2	-2.826
22.2167	-2.82066
22.2333	-2.81014
22.25	-2.81776
22.2667	-2.7964
22.2833	-2.78877
22.3	-2.7845
22.3167	-2.78481
22.3333	-2.77031
22.35	-2.76924
22.3667	-2.75902
22.3833	-2.74925
22.4	-2.72667
22.4167	-2.73338
22.4333	-2.73216
22.45	-2.72011
22.4667	-2.70866
22.4833	-2.7105
22.5	-2.7047
22.5167	-2.70653
22.5333	-2.67784
22.55	-2.66045
22.5667	-2.67036
22.5833	-2.6786
22.6	-2.68959
22.6167	-2.66197
22.6333	-2.65862
22.65	-2.68028
22.6667	-2.65205
22.6833	-2.64427
22.7	-2.63054
22.7167	-2.64381
22.7333	-2.63481
22.75	-2.61681
22.7667	-2.6191
22.7833	-2.62093
22.8	-2.62383
22.8167	-2.61803
22.8333	-2.61131
22.85	-2.6049
22.8667	-2.62337
22.8833	-2.62276
22.9	-2.60323
22.9167	-2.60521
22.9333	-2.60841
22.95	-2.59895
22.9667	-2.58003
22.9833	-2.58278
23	-2.57149
23.0167	-2.56798
23.0333	-2.56203
23.05	-2.54936
23.0667	-2.56386
23.0833	-2.55318
23.1	-2.5518
23.1167	-2.54295
23.1333	-2.53548
23.15	-2.53349
23.1667	-2.53151
23.1833	-2.54066
23.2	-2.53456
23.2167	-2.53975
23.2333	-2.52129
23.25	-2.51335
23.2667	-2.51564
23.2833	-2.51472
23.3	-2.50175
23.3167	-2.50679
23.3333	-2.50755
23.35	-2.50557
23.3667	-2.50237
23.3833	-2.48985
23.4	-2.47734
23.4167	-2.47383
23.4333	-2.47841
23.45	-2.47871
23.4667	-2.47856
23.4833	-2.48909
23.5	-2.49092
23.5167	-2.47459
23.5333	-2.47368
23.55	-2.45781
23.5667	-2.46986
23.5833	-2.46986
23.6	-2.45308
23.6167	-2.46162
23.6333	-2.48268
23.65	-2.46361
23.6667	-2.47078
23.6833	-2.46803
23.7	-2.48711
23.7167	-2.46696
23.7333	-2.46025
23.75	-2.47643
23.7667	-2.46864
23.7833	-2.47154
23.8	-2.47002
23.8167	-2.47581
23.8333	-2.4688
23.85	-2.47337
23.8667	-2.48116
23.8833	-2.46132
23.9	-2.4659
23.9167	-2.48222
23.9333	-2.48131
23.95	-2.48253
23.9667	-2.4807
23.9833	-2.49214
24	-2.48619
24.0167	-2.48634
24.0333	-2.49672
24.05	-2.48711
24.0667	-2.48009
24.0833	-2.49001
24.1	-2.49962
24.1167	-2.46559
24.1333	-2.46849
24.15	-2.44972
24.1667	-2.45979
24.1833	-2.46803
24.2	-2.46086
24.2167	-2.45491
24.2333	-2.45583
24.25	-2.4427
24.2667	-2.44804
24.2833	-2.45308
24.3	-2.45384
24.3167	-2.45049
24.3333	-2.45796
24.35	-2.4485
24.3667	-2.46925
24.3833	-2.472
24.4	-2.45567
24.4167	-2.45522
24.4333	-2.45415
24.45	-2.46025
24.4667	-2.44591
24.4833	-2.45354
24.5	-2.4395
24.5167	-2.43202
24.5333	-2.43691
24.55	-2.43736
24.5667	-2.43538
24.5833	-2.4279
24.6	-2.41966
24.6167	-2.42989
24.6333	-2.41768
24.65	-2.42058
24.6667	-2.43065
24.6833	-2.43202
24.7	-2.43568
24.7167	-2.42287
24.7333	-2.41356
24.75	-2.43034
24.7667	-2.43019
24.7833	-2.42256
24.8	-2.43858
24.8167	-2.4279
24.8333	-2.42195
24.85	-2.40791
24.8667	-2.41234
24.8833	-2.39555
24.9	-2.38762
24.9167	-2.40227
24.9333	-2.39891
24.95	-2.39967
24.9667	-2.42912
24.9833	-2.40105
25	-2.40669
25.0167	-2.39296
25.0333	-2.38686
25.05	-2.38976
25.0667	-2.40166
25.0833	-2.40852
25.1	-2.39265
25.1167	-2.39784
25.1333	-2.39555
25.15	-2.39143
25.1667	-2.38838
25.1833	-2.39738
25.2	-2.39464
25.2167	-2.39754
25.2333	-2.3896
25.25	-2.38762
25.2667	-2.38747
25.2833	-2.38609
25.3	-2.39037
25.3167	-2.38441
25.3333	-2.39861
25.35	-2.4015
25.3667	-2.39769
25.3833	-2.40044
25.4	-2.38274
25.4167	-2.40471
25.4333	-2.39922
25.45	-2.40578
25.4667	-2.40486
25.4833	-2.41463
25.5	-2.4128
25.5167	-2.42226
25.5333	-2.41127
25.55	-2.39738
25.5667	-2.41814
25.5833	-2.40669
25.6	-2.40685
25.6167	-2.42149
25.6333	-2.4192
25.65	-2.40196
25.6667	-2.40608
25.6833	-2.42394
25.7	-2.42317
25.7167	-2.41768
25.7333	-2.40715
25.75	-2.41203
25.7667	-2.42485
25.7833	-2.41234
25.8	-2.41097
25.8167	-2.41966
25.8333	-2.41081
25.85	-2.40501
25.8667	-2.41661
25.8833	-2.40181
25.9	-2.40517
25.9167	-2.39449
25.9333	-2.39967
25.95	-2.41402
25.9667	-2.41234
25.9833	-2.39403
26	-2.38518
26.0167	-2.39815
26.0333	-2.41341
26.05	-2.39967
26.0667	-2.40105
26.0833	-2.41707
26.1	-2.42699
26.1167	-2.42821
26.1333	-2.42622
26.15	-2.41402
26.1667	-2.41524
26.1833	-2.42226
26.2	-2.41325
26.2167	-2.41798
26.2333	-2.40013
26.25	-2.38899
26.2667	-2.3983
26.2833	-2.39952
26.3	-2.4073
26.3167	-2.40379
26.3333	-2.40959
26.35	-2.41432
26.3667	-2.41936
26.3833	-2.4157
26.4	-2.40135
26.4167	-2.42043
26.4333	-2.41692
26.45	-2.43721
26.4667	-2.43233
26.4833	-2.43919
26.5	-2.43431
26.5167	-2.43507
26.5333	-2.43324
26.55	-2.43874
26.5667	-2.44438
26.5833	-2.45216
26.6	-2.4482
26.6167	-2.45918
26.6333	-2.44667
26.65	-2.44347
26.6667	-2.43736
26.6833	-2.43904
26.7	-2.42622
26.7167	-2.42561
26.7333	-2.43507
26.75	-2.43996
26.7667	-2.43828
26.7833	-2.43065
26.8	-2.4099
26.8167	-2.41447
26.8333	-2.42287
26.85	-2.41692
26.8667	-2.40929
26.8833	-2.38884
26.9	-2.37938
26.9167	-2.36473
26.9333	-2.34489
26.95	-2.3336
26.9667	-2.31956
26.9833	-2.28401
27	-2.25639
27.0167	-2.22679
27.0333	-2.1946
27.05	-2.17369
27.0667	-2.12395
27.0833	-2.06627
27.1	-2.01576
27.1167	-1.96983
27.1333	-1.91841
27.15	-1.85143
27.1667	-1.77177
27.1833	-1.70845
27.2	-1.63918
27.2167	-1.55952
27.2333	-1.45348
27.25	-1.34865
27.2667	-1.27434
27.2833	-1.17836
27.3	-1.05934
27.3167	-0.945664
27.3333	-0.82756
27.35	-0.708389
27.3667	-0.613327
27.3833	-0.489578
27.4	-0.381393
27.4167	-0.273361
27.4333	-0.163651
27.45	-0.0572968
27.4667	0.0525665
27.4833	0.156937
27.5	0.248795
27.5167	0.343246
27.5333	0.422897
27.55	0.509262
27.5667	0.570145
27.5833	0.634689
27.6	0.687637
27.6167	0.713577
27.6333	0.749893
27.65	0.783157
27.6667	0.808945
27.6833	0.823898
27.7	0.807724
27.7167	0.793533
27.7333	0.78682
27.75	0.758591
27.7667	0.719681
27.7833	0.673599
27.8	0.619278
27.8167	0.556259
27.8333	0.516281
27.85	0.444565
27.8667	0.38765
27.8833	0.297928
27.9	0.23613
27.9167	0.163956
27.9333	0.0814056
27.95	0.026474
27.9667	-0.044632
27.9833	-0.134811
28	-0.198746
28.0167	-0.282211
28.0333	-0.371628
28.05	-0.44899
28.0667	-0.514145
28.0833	-0.586014
28.1	-0.653458
28.1167	-0.724258
28.1333	-0.780869
28.15	-0.822678
28.1667	-0.869217
28.1833	-0.93132
28.2	-0.991287
28.2167	-1.04546
28.2333	-1.09612
28.25	-1.12724
28.2667	-1.15517
28.2833	-1.20262
28.3	-1.23482
28.3167	-1.28075
28.3333	-1.3163
28.35	-1.33904
28.3667	-1.37383
28.3833	-1.40068
28.4	-1.42265
28.4167	-1.43852
28.4333	-1.48689
28.45	-1.51054
28.4667	-1.53099
28.4833	-1.55952
28.5	-1.5757
28.5167	-1.59767
28.5333	-1.59493
28.55	-1.59126
28.5667	-1.64131
28.5833	-1.65566
28.6	-1.67702
28.6167	-1.68282
28.6333	-1.69685
28.65	-1.71501
28.6667	-1.71288
28.6833	-1.72707
28.7	-1.73546
28.7167	-1.75789
28.7333	-1.7881
28.75	-1.81053
28.7667	-1.80733
28.7833	-1.82365
28.8	-1.84013
28.8167	-1.84654
28.8333	-1.85005
28.85	-1.87279
28.8667	-1.87538
28.8833	-1.88133
28.9	-1.90361
28.9167	-1.90483
28.9333	-1.90102
28.95	-1.90773
28.9667	-1.9178
28.9833	-1.93321
29	-1.93687
29.0167	-1.93932
29.0333	-1.95686
29.05	-1.95229
29.0667	-1.96938
29.0833	-1.98479
29.1	-1.98799
29.1167	-1.99135
29.1333	-2.00584
29.15	-2.01378
29.1667	-2.00706
29.1833	-2.00783
29.2	-2.01592
29.2167	-2.01988
29.2333	-2.03331
29.25	-2.04124
29.2667	-2.04567
29.2833	-2.03484
29.3	-2.05925
29.3167	-2.06352
29.3333	-2.08046
29.35	-2.08321
29.3667	-2.08229
29.3833	-2.09877
29.4	-2.12242
29.4167	-2.10991
29.4333	-2.10976
29.45	-2.10854
29.4667	-2.12807
29.4833	-2.14302
29.5	-2.14027
29.5167	-2.13219
29.5333	-2.14363
29.55	-2.1624
29.5667	-2.17293
29.5833	-2.17659
29.6	-2.16911
29.6167	-2.18803
29.6333	-2.17033
29.65	-2.16866
29.6667	-2.17186
29.6833	-2.16896
29.7	-2.17918
29.7167	-2.17018
29.7333	-2.17598
29.75	-2.17705
29.7667	-2.183
29.7833	-2.19231
29.8	-2.20711
29.8167	-2.20558
29.8333	-2.2007
29.85	-2.21153
29.8667	-2.20741
29.8833	-2.18864
29.9	-2.20848
29.9167	-2.20634
29.9333	-2.20589
29.95	-2.21062
29.9667	-2.22374
29.9833	-2.23915
30	-2.23106

## Sheet: MW Results
Administrative Information
File name	ICF_04_12_2024-0011.sample
Analysed by	OBPC
Date of analysis	09 December 2024 13:15:23
Analysis comments
Analysis Module	GPC Analysis
MW Averages
Peaks	Mp (g/mol)	Mn (g/mol)	Mw (g/mol)	Mz (g/mol)	Mz+1 (g/mol)	Mv (g/mol)	PD
Peak 1	160048	40763	274141	847538	1553904	755147	6.72524
Sample Parameters
Injection volume (µL)	200
Concentration options	Undefined
Concentration (mg/mL)	1
dn/dc (mL/g)	0.1
UV extinction coefficient [(mg/mL)-¹][cm-¹]	1
Mark-Houwink K ((10e-5) dL/g)	14.1
Mark-Houwink Alpha	0.7
Concentration Detector Used in Analysis	RI
Baseline regions	Start (mins)	End (mins)
Baseline region 1	6.8	8.3
Baseline region 2	17.35	17.6333
Peaks	Start (mins)	End (mins)
Peak 1	10.7333	16.4167
	Trace	Peak Max RT (mins)	Peak Area (mV.s)	Peak Height (mV)
	RI	13.05	628.587	-4.21208
Flowrate region	Start (mins)	End (mins)
IDD
Reference detector	Undefined
IDD Undefined (secs)	0
Last modified by	OBPC
Last modified date	09 December 2024 13:15:23
Comments
System Calibration
Detector Constants
Entered Parameters For Concentration
Concentration (mg/mL)	0
Injection volume (µL)	0
dn/dc (mL/g)	0
UV extinction coefficient [(mg/mL)-¹][cm-¹]	0
Eluent refractive index	0
Flow rate (mL/min)	0
Comments
Entered Parameters For LS
Mp	0
LS wavelength (nm)	0
Comments
Entered Parameters For Viscometer
Known IV (dL/g)	0
Use Constant Inlet Pressure	No
Comments
System Calibration Information
Created by	OBPC
Creation date	29 October 2024 11:18:00
Last modified by	OBPC
Last modified date	29 October 2024 11:18:00
Information
Sample file used for calibration
Concentration Regions
Baseline regions	Start (mins)	End (mins)
Peaks	Start (mins)	End (mins)
Flowrate region	Start (mins)	End (mins)
LS Regions
Baseline regions	Start (mins)	End (mins)
Peaks	Start (mins)	End (mins)
Flowrate region	Start (mins)	End (mins)
VS Regions
Baseline regions	Start (mins)	End (mins)
Peaks	Start (mins)	End (mins)
Flowrate region	Start (mins)	End (mins)
System Calibration Peak Information
Channel	Peak Max RT (mins)	Peak Height (mV)	Peak Area (mV.s)
Flowrate Information
FRM Name
FRM RT (mins)	0
FRCF	1
Column Calibration
Name	2024-10-29-001
Created By	OBPC
Creation Date	29/10/2024 16:43:21
Last Modified By	OBPC
Last Modified	29/10/2024 16:46:00
High Limit RT (mins)	10.3167
Low Limit RT (mins)	17.05
High Limit MW	6542896
Low Limit MW	585
K (Input) ((10e-5) dL/g)	14.1
Alpha (Input)	0.7
Calibration Flow Marker Name
Calibration Flow Marker RT (mins)	0
Calibration Comments	GPC Column Calibration created 29 October 2024 by OBPC GPC Column Calibration amended 29 October 2024 by OBPC GPC Column Calibration amended 29 October 2024 by OBPC
Calibration Type	GPC Narrow Standard
Curve Fit Type	Polynomial
Order Of Curve Fit	5
Number Of Points	11
Curve Fit Equation	y = - 0.0006266x^5 + 0.04142x^4 - 1.085x^3 + 14.06x^2 - 90.8x + 242.2
Coeff a	242.186
Coeff b	-90.7983
Coeff c	14.0588
Coeff d	-1.08465
Coeff e	0.0414232
Coeff f	-0.000626569
Residual Sum Of Squares	0.000581819
Corrected Sum Of Squares	18.6999
Coefficient Of Determination	0.999969
Standard Y Error Estimate	0.0107872
Linear Correlation Coefficient	-0.999868

## Sheet: Slice Table
Slice Table
RT (mins)	RI	Norm Ht	Cum Ht	Mw (g/mol)	logM	dwdlogM	Outside Calib	Peak
10.7333	-0.110756	0.000176167	0.999908	3751785	6.57424	0.019559	No	1
10.75	-0.121452	0.00019318	0.999719	3671126	6.5648	0.0204566	No	1
10.7667	-0.121162	0.000192718	0.999527	3592279	6.55537	0.0201953	No	1
10.7833	-0.118125	0.000187887	0.999337	3515195	6.54595	0.0201252	No	1
10.8	-0.120123	0.000191066	0.999142	3439827	6.53654	0.0213434	No	1
10.8167	-0.132345	0.000210505	0.998932	3366131	6.52713	0.0233751	No	1
10.8333	-0.143956	0.000228974	0.998709	3294063	6.51773	0.0240386	No	1
10.85	-0.140004	0.000222687	0.998475	3223580	6.50834	0.0257868	No	1
10.8667	-0.164433	0.000261543	0.998222	3154641	6.49895	0.0280005	No	1
10.8833	-0.165973	0.000263994	0.997961	3087208	6.48957	0.0277563	No	1
10.9	-0.16141	0.000256736	0.997698	3021243	6.48019	0.0281959	No	1
10.9167	-0.171038	0.00027205	0.997427	2956707	6.47081	0.0296436	No	1
10.9333	-0.178377	0.000283723	0.997142	2893567	6.46143	0.0312195	No	1
10.95	-0.18953	0.000301464	0.996842	2831786	6.45206	0.0327163	No	1
10.9667	-0.195954	0.00031168	0.996531	2771333	6.44269	0.0336415	No	1
10.9833	-0.200394	0.000318742	0.996214	2712173	6.43332	0.0341762	No	1
11	-0.202239	0.000321678	0.995888	2654277	6.42395	0.0352398	No	1
11.0167	-0.212935	0.000338691	0.995545	2597613	6.41457	0.0381271	No	1
11.0333	-0.236296	0.000375848	0.995182	2542153	6.4052	0.0393283	No	1
11.05	-0.227155	0.000361309	0.994816	2487868	6.39583	0.0387273	No	1
11.0667	-0.229306	0.00036473	0.994443	2434729	6.38645	0.0408165	No	1
11.0833	-0.251904	0.000400674	0.994046	2382711	6.37707	0.0437045	No	1
11.1	-0.263515	0.000419143	0.993636	2331787	6.36769	0.0437169	No	1
11.1167	-0.252239	0.000401206	0.99322	2281933	6.3583	0.0448906	No	1
11.1333	-0.277583	0.000441518	0.99279	2233122	6.34891	0.0466684	No	1
11.15	-0.273478	0.000434988	0.992342	2185333	6.33952	0.0487779	No	1
11.1667	-0.302789	0.000481611	0.991869	2138541	6.33012	0.0518639	No	1
11.1833	-0.310281	0.000493527	0.991373	2092725	6.32071	0.0536538	No	1
11.2	-0.324334	0.000515879	0.99085	2047862	6.3113	0.0573857	No	1
11.2167	-0.354866	0.000564443	0.990292	2003932	6.30188	0.0611101	No	1
11.2333	-0.368919	0.000586795	0.989707	1960914	6.29246	0.0630113	No	1
11.25	-0.377936	0.000601138	0.989097	1918787	6.28303	0.066515	No	1
11.2667	-0.411062	0.000653828	0.988452	1877533	6.27359	0.0701261	No	1
11.2833	-0.421453	0.000670355	0.987771	1837132	6.26414	0.074011	No	1
11.3	-0.457936	0.000728385	0.98705	1797566	6.25468	0.0785022	No	1
11.3167	-0.475651	0.000756562	0.986293	1758818	6.24522	0.0814441	No	1
11.3333	-0.493824	0.000785467	0.985507	1720869	6.23575	0.0845056	No	1
11.35	-0.513065	0.000816071	0.984686	1683703	6.22627	0.0886329	No	1
11.3667	-0.544055	0.000865363	0.983825	1647303	6.21677	0.0928512	No	1
11.3833	-0.564516	0.000897909	0.982924	1611653	6.20727	0.0967259	No	1
11.4	-0.591539	0.000940891	0.981974	1576738	6.19776	0.102949	No	1
11.4167	-0.640229	0.00101834	0.980961	1542542	6.18824	0.109906	No	1
11.4333	-0.676255	0.00107564	0.979883	1509050	6.1787	0.11612	No	1
11.45	-0.716247	0.00113925	0.978744	1476247	6.16916	0.122671	No	1
11.4667	-0.756545	0.00120335	0.977543	1444121	6.1596	0.128633	No	1
11.4833	-0.789672	0.00125604	0.976283	1412655	6.15004	0.134704	No	1
11.5	-0.831495	0.00132256	0.974963	1381838	6.14046	0.141049	No	1
11.5167	-0.868131	0.00138083	0.973582	1351656	6.13087	0.146906	No	1
11.5333	-0.904309	0.00143838	0.972146	1322097	6.12126	0.152051	No	1
11.55	-0.932553	0.0014833	0.97066	1293146	6.11165	0.157028	No	1
11.5667	-0.9669	0.00153793	0.969111	1264793	6.10202	0.164735	No	1
11.5833	-1.02841	0.00163577	0.96748	1237025	6.09238	0.173664	No	1
11.6	-1.07786	0.00171442	0.965762	1209831	6.08272	0.182328	No	1
11.6167	-1.13647	0.00180765	0.963957	1183199	6.07306	0.19104	No	1
11.6333	-1.18684	0.00188776	0.962073	1157118	6.06338	0.198222	No	1
11.65	-1.22714	0.00195186	0.960114	1131576	6.05368	0.205919	No	1
11.6667	-1.28407	0.00204241	0.958077	1106564	6.04398	0.213855	No	1
11.6833	-1.32757	0.0021116	0.955963	1082071	6.03426	0.220929	No	1
11.7	-1.37427	0.00218589	0.953784	1058087	6.02452	0.22681	No	1
11.7167	-1.40343	0.00223227	0.951528	1034600	6.01477	0.235981	No	1
11.7333	-1.49073	0.00237112	0.949167	1011603	6.00501	0.247645	No	1
11.75	-1.55086	0.00246677	0.946711	989085	5.99523	0.254795	No	1
11.7667	-1.58307	0.00251801	0.944186	967036	5.98544	0.261105	No	1
11.7833	-1.63314	0.00259764	0.941589	945448	5.97564	0.268632	No	1
11.8	-1.68061	0.00267314	0.938916	924311	5.96582	0.275739	No	1
11.8167	-1.72579	0.002745	0.936171	903617	5.95598	0.282603	No	1
11.8333	-1.77051	0.00281614	0.93335	883357	5.94614	0.290258	No	1
11.85	-1.82576	0.00290402	0.930448	863523	5.93627	0.298135	No	1
11.8667	-1.87354	0.00298001	0.927467	844105	5.9264	0.305448	No	1
11.8833	-1.92207	0.00305721	0.924412	825097	5.91651	0.31231	No	1
11.9	-1.96451	0.00312471	0.921276	806490	5.9066	0.320915	No	1
11.9167	-2.03502	0.00323686	0.918041	788276	5.89668	0.331169	No	1
11.9333	-2.09836	0.00333761	0.91472	770447	5.88674	0.33745	No	1
11.95	-2.11958	0.00337137	0.911339	752997	5.87679	0.34197	No	1
11.9667	-2.1611	0.00343741	0.907897	735917	5.86683	0.349082	No	1
11.9833	-2.21498	0.0035231	0.904378	719201	5.85685	0.356028	No	1
12	-2.25467	0.00358623	0.900787	702841	5.84686	0.362676	No	1
12.0167	-2.30504	0.00366634	0.897122	686830	5.83685	0.36978	No	1
12.0333	-2.35067	0.00373894	0.893387	671161	5.82683	0.375606	No	1
12.05	-2.38517	0.00379381	0.889588	655829	5.81679	0.381356	No	1
12.0667	-2.43005	0.00386519	0.885718	640825	5.80674	0.388771	No	1
12.0833	-2.48576	0.0039538	0.881771	626145	5.79667	0.395576	No	1
12.1	-2.52316	0.00401328	0.877754	611781	5.7866	0.401559	No	1
12.1167	-2.56864	0.00408563	0.873667	597726	5.7765	0.408261	No	1
12.1333	-2.61535	0.00415992	0.869511	583976	5.76639	0.414084	No	1
12.15	-2.64985	0.0042148	0.865293	570524	5.75627	0.41944	No	1
12.1667	-2.69076	0.00427987	0.861007	557364	5.74614	0.426377	No	1
12.1833	-2.74555	0.00436702	0.85664	544491	5.73599	0.434232	No	1
12.2	-2.79836	0.00445102	0.85219	531898	5.72583	0.441473	No	1
12.2167	-2.84553	0.00452604	0.847667	519580	5.71565	0.447557	No	1
12.2333	-2.88369	0.00458674	0.843077	507532	5.70546	0.453415	No	1
12.25	-2.9281	0.00465739	0.838418	495748	5.69526	0.459847	No	1
12.2667	-2.97374	0.00472998	0.833682	484223	5.68505	0.467325	No	1
12.2833	-3.03174	0.00482223	0.828866	472952	5.67482	0.474422	No	1
12.3	-3.07265	0.0048873	0.823972	461930	5.66458	0.481237	No	1
12.3167	-3.12714	0.00497397	0.818996	451151	5.65432	0.489484	No	1
12.3333	-3.18666	0.00506864	0.813936	440611	5.64406	0.496148	No	1
12.35	-3.22086	0.00512303	0.808808	430305	5.63378	0.501635	No	1
12.3667	-3.26527	0.00519368	0.803617	420229	5.62349	0.507235	No	1
12.3833	-3.30099	0.0052505	0.798366	410377	5.61318	0.512112	No	1
12.4	-3.3361	0.00530634	0.793052	400745	5.60287	0.518198	No	1
12.4167	-3.38754	0.00538816	0.787662	391328	5.59254	0.52576	No	1
12.4333	-3.44188	0.00547458	0.782189	382123	5.5822	0.532868	No	1
12.45	-3.48752	0.00554718	0.776648	373124	5.57185	0.538037	No	1
12.4667	-3.51668	0.00559356	0.771057	364328	5.56149	0.541237	No	1
12.4833	-3.53668	0.00562537	0.765416	355731	5.55112	0.546441	No	1
12.5	-3.59193	0.00571326	0.7597	347328	5.54074	0.554777	No	1
12.5167	-3.65283	0.00581012	0.753894	339115	5.53035	0.562512	No	1
12.5333	-3.7003	0.00588562	0.748015	331088	5.51994	0.567677	No	1
12.55	-3.72763	0.00592909	0.742083	323244	5.50953	0.571679	No	1
12.5667	-3.75984	0.00598032	0.736102	315579	5.49911	0.575977	No	1
12.5833	-3.79098	0.00602986	0.730067	308088	5.48867	0.580953	No	1
12.6	-3.83204	0.00609517	0.72398	300769	5.47823	0.585086	No	1
12.6167	-3.85204	0.00612699	0.717845	293617	5.46778	0.588782	No	1
12.6333	-3.88731	0.00618307	0.711664	286630	5.45732	0.593042	No	1
12.65	-3.91463	0.00622654	0.705433	279803	5.44685	0.597321	No	1
12.6667	-3.95005	0.00628287	0.699148	273134	5.43638	0.602405	No	1
12.6833	-3.98791	0.00634309	0.692815	266618	5.42589	0.605655	No	1
12.7	-3.99906	0.00636083	0.686458	260253	5.4154	0.605979	No	1
12.7167	-3.99816	0.00635939	0.680081	254036	5.4049	0.608442	No	1
12.7333	-4.03739	0.00642179	0.673668	247963	5.39439	0.612174	No	1
12.75	-4.05312	0.00644681	0.667222	242030	5.38387	0.613667	No	1
12.7667	-4.06259	0.00646188	0.660755	236237	5.37335	0.615369	No	1
12.7833	-4.08092	0.00649103	0.654262	230578	5.36282	0.618006	No	1
12.8	-4.1026	0.00652552	0.647738	225051	5.35228	0.620448	No	1
12.8167	-4.11818	0.0065503	0.641185	219654	5.34174	0.622615	No	1
12.8333	-4.13605	0.00657872	0.634611	214383	5.33119	0.623806	No	1
12.85	-4.1385	0.00658262	0.628016	209236	5.32064	0.62607	No	1
12.8667	-4.17041	0.00663337	0.621388	204210	5.31008	0.629245	No	1
12.8833	-4.18477	0.00665621	0.614734	199303	5.29951	0.630503	No	1
12.9	-4.19104	0.00666618	0.608064	194511	5.28894	0.631627	No	1
12.9167	-4.20341	0.00668587	0.60138	189832	5.27837	0.632664	No	1
12.9333	-4.20831	0.00669366	0.59469	185264	5.26779	0.632226	No	1
12.95	-4.20085	0.00668179	0.588005	180805	5.25721	0.631369	No	1
12.9667	-4.19995	0.00668036	0.581323	176451	5.24662	0.631114	No	1
12.9833	-4.20027	0.00668086	0.574638	172201	5.23604	0.631416	No	1
13	-4.20654	0.00669084	0.567953	168052	5.22544	0.630955	No	1
13.0167	-4.19648	0.00667484	0.561267	164002	5.21485	0.63113	No	1
13.0333	-4.21099	0.00669792	0.554573	160048	5.20425	0.632159	No	1
13.05	-4.21208	0.00669965	0.547877	156189	5.19365	0.631178	No	1
13.0667	-4.19958	0.00667977	0.5412	152423	5.18305	0.628452	No	1
13.0833	-4.17716	0.00664411	0.534547	148746	5.17245	0.626603	No	1
13.1	-4.17611	0.00664244	0.5279	145158	5.16184	0.626958	No	1
13.1167	-4.18284	0.00665314	0.521253	141656	5.15123	0.626472	No	1
13.1333	-4.17034	0.00663326	0.514618	138239	5.14063	0.62471	No	1
13.15	-4.15983	0.00661654	0.507999	134903	5.13002	0.623333	No	1
13.1667	-4.15221	0.00660443	0.501403	131649	5.11942	0.620382	No	1
13.1833	-4.12049	0.00655397	0.49484	128472	5.10881	0.61714	No	1
13.2	-4.10875	0.0065353	0.488305	125373	5.0982	0.615047	No	1
13.2167	-4.09214	0.00650887	0.481799	122348	5.0876	0.611988	No	1
13.2333	-4.06728	0.00646934	0.475327	119397	5.07699	0.608579	No	1
13.25	-4.04578	0.00643514	0.468888	116517	5.06639	0.605965	No	1
13.2667	-4.0313	0.0064121	0.462486	113707	5.05579	0.601775	No	1
13.2833	-3.98859	0.00634417	0.456131	110965	5.04519	0.597223	No	1
13.3	-3.96907	0.00631313	0.449819	108290	5.03459	0.594095	No	1
13.3167	-3.94513	0.00627505	0.443538	105681	5.024	0.591486	No	1
13.3333	-3.93233	0.00625468	0.437284	103134	5.0134	0.58942	No	1
13.35	-3.9154	0.00622777	0.431062	100650	5.00281	0.585752	No	1
13.3667	-3.88109	0.00617318	0.424886	98226	4.99223	0.580975	No	1
13.3833	-3.84921	0.00612248	0.418761	95862	4.98165	0.576761	No	1
13.4	-3.82222	0.00607954	0.412677	93555	4.97107	0.573604	No	1
13.4167	-3.80423	0.00605093	0.406627	91305	4.96049	0.570644	No	1
13.4333	-3.77967	0.00601188	0.400611	89110	4.94993	0.567824	No	1
13.45	-3.76336	0.00598593	0.394628	86968	4.93936	0.564811	No	1
13.4667	-3.73606	0.00594251	0.388683	84879	4.9288	0.561372	No	1
13.4833	-3.71395	0.00590734	0.382776	82842	4.91825	0.558015	No	1
13.5	-3.68757	0.00586538	0.376909	80854	4.9077	0.554485	No	1
13.5167	-3.66302	0.00582633	0.371083	78915	4.89716	0.550747	No	1
13.5333	-3.63374	0.00577975	0.365302	77024	4.88663	0.54672	No	1
13.55	-3.60522	0.00573439	0.359567	75179	4.8761	0.542645	No	1
13.5667	-3.57517	0.0056866	0.353881	73379	4.86557	0.538163	No	1
13.5833	-3.54116	0.0056325	0.348248	71624	4.85506	0.533401	No	1
13.6	-3.5073	0.00557864	0.342664	69912	4.84455	0.529456	No	1
13.6167	-3.48397	0.00554153	0.337115	68242	4.83405	0.527449	No	1
13.6333	-3.47559	0.00552821	0.331592	66613	4.82356	0.525557	No	1
13.65	-3.45363	0.00549328	0.326097	65025	4.81308	0.522738	No	1
13.6667	-3.4329	0.0054603	0.320635	63475	4.8026	0.520043	No	1
13.6833	-3.41246	0.0054278	0.315209	61964	4.79214	0.516985	No	1
13.7	-3.38684	0.00538705	0.30982	60489	4.78168	0.513645	No	1
13.7167	-3.3626	0.00534848	0.304474	59052	4.77123	0.509824	No	1
13.7333	-3.33057	0.00529754	0.299169	57649	4.76079	0.506659	No	1
13.75	-3.31487	0.00527256	0.293898	56282	4.75037	0.5042	No	1
13.7667	-3.29199	0.00523618	0.288674	54948	4.73995	0.498624	No	1
13.7833	-3.2354	0.00514616	0.283519	53646	4.72954	0.492116	No	1
13.8	-3.20032	0.00509036	0.278425	52377	4.71914	0.487801	No	1
13.8167	-3.17241	0.00504597	0.273374	51140	4.70876	0.484845	No	1
13.8333	-3.15503	0.00501833	0.268359	49932	4.69838	0.481777	No	1
13.85	-3.12559	0.00497151	0.263387	48755	4.68802	0.477682	No	1
13.8667	-3.09478	0.0049225	0.258469	47606	4.67766	0.472533	No	1
13.8833	-3.05162	0.00485384	0.253615	46486	4.66732	0.466231	No	1
13.9	-3.00586	0.00478106	0.24883	45394	4.657	0.460337	No	1
13.9167	-2.96803	0.00472089	0.244111	44328	4.64668	0.454567	No	1
13.9333	-2.92394	0.00465077	0.239452	43289	4.63638	0.449701	No	1
13.95	-2.89787	0.00460929	0.234849	42275	4.62608	0.444808	No	1
13.9667	-2.85348	0.00453869	0.230306	41286	4.6158	0.439097	No	1
13.9833	-2.81687	0.00448046	0.22583	40322	4.60554	0.433144	No	1
14	-2.76943	0.00440501	0.221418	39381	4.59529	0.427396	No	1
14.0167	-2.73557	0.00435115	0.217064	38464	4.58505	0.423125	No	1
14.0333	-2.70721	0.00430603	0.212756	37569	4.57483	0.41961	No	1
14.05	-2.68311	0.00426771	0.208494	36696	4.56462	0.415177	No	1
14.0667	-2.643	0.0042039	0.204288	35844	4.55442	0.409703	No	1
14.0833	-2.60563	0.00414446	0.200142	35013	4.54423	0.40465	No	1
14.1	-2.571	0.00408939	0.196051	34203	4.53406	0.399841	No	1
14.1167	-2.53684	0.00403505	0.192019	33413	4.52392	0.394378	No	1
14.1333	-2.49398	0.00396687	0.188054	32642	4.51378	0.387624	No	1
14.15	-2.44348	0.00388656	0.184162	31889	4.50364	0.3813	No	1
14.1667	-2.40627	0.00382736	0.180332	31156	4.49354	0.376441	No	1
14.1833	-2.37454	0.0037769	0.176556	30440	4.48344	0.371692	No	1
14.2	-2.33885	0.00372013	0.172832	29742	4.47337	0.367176	No	1
14.2167	-2.31018	0.00367453	0.169162	29060	4.4633	0.362107	No	1
14.2333	-2.26762	0.00360684	0.165551	28396	4.45326	0.356664	No	1
14.25	-2.23437	0.00355395	0.161988	27747	4.44322	0.353728	No	1
14.2667	-2.22356	0.00353674	0.158467	27115	4.43321	0.349197	No	1
14.2833	-2.17032	0.00345206	0.155004	26497	4.4232	0.343429	No	1
14.3	-2.14409	0.00341034	0.151599	25895	4.41322	0.33851	No	1
14.3167	-2.10168	0.00334289	0.148248	25307	4.40324	0.333773	No	1
14.3333	-2.07789	0.00330506	0.144951	24734	4.39329	0.328706	No	1
14.35	-2.03152	0.0032313	0.141722	24175	4.38337	0.321376	No	1
14.3667	-1.97966	0.0031488	0.138569	23629	4.37345	0.314172	No	1
14.3833	-1.93511	0.00307796	0.135481	23096	4.36354	0.30946	No	1
14.4	-1.91453	0.00304521	0.132447	22576	4.35365	0.304292	No	1
14.4167	-1.8645	0.00296563	0.129473	22069	4.34378	0.298493	No	1
14.4333	-1.83628	0.00292075	0.126562	21574	4.33393	0.292245	No	1
14.45	-1.78091	0.00283268	0.123706	21091	4.3241	0.288372	No	1
14.4667	-1.7823	0.00283488	0.120888	20619	4.31427	0.285662	No	1
14.4833	-1.74142	0.00276986	0.118115	20159	4.30447	0.28007	No	1
14.5	-1.7074	0.00271576	0.115403	19710	4.29469	0.274111	No	1
14.5167	-1.66225	0.00264395	0.112752	19271	4.2849	0.268604	No	1
14.5333	-1.63404	0.00259907	0.110146	18843	4.27515	0.265608	No	1
14.55	-1.61986	0.00257652	0.107575	18425	4.26541	0.262538	No	1
14.5667	-1.59089	0.00253043	0.105053	18018	4.25571	0.256458	No	1
14.5833	-1.54009	0.00244964	0.102598	17620	4.24601	0.24963	No	1
14.6	-1.50226	0.00238947	0.100201	17231	4.23631	0.2454	No	1
14.6167	-1.48336	0.0023594	0.0978423	16852	4.22665	0.242385	No	1
14.6333	-1.46048	0.00232301	0.0955155	16481	4.21698	0.239711	No	1
14.65	-1.44585	0.00229974	0.0932275	16120	4.20737	0.235186	No	1
14.6667	-1.4007	0.00222792	0.0909908	15766	4.19772	0.229861	No	1
14.6833	-1.3766	0.0021896	0.0887961	15422	4.18814	0.227248	No	1
14.7	-1.36441	0.0021702	0.086635	15085	4.17855	0.223637	No	1
14.7167	-1.32841	0.00211295	0.0845154	14756	4.16897	0.219325	No	1
14.7333	-1.30798	0.00208045	0.0824334	14435	4.15942	0.216548	No	1
14.75	-1.2906	0.00205281	0.0803885	14122	4.1499	0.212269	No	1
14.7667	-1.25232	0.00199191	0.0783861	13815	4.14035	0.208356	No	1
14.7833	-1.23951	0.00197155	0.0764257	13516	4.13085	0.204147	No	1
14.8	-1.19787	0.00190531	0.074508	13224	4.12136	0.200035	No	1
14.8167	-1.18644	0.00188713	0.0726228	12939	4.1119	0.197971	No	1
14.8333	-1.16937	0.00185997	0.0707547	12660	4.10243	0.197067	No	1
14.85	-1.17182	0.00186388	0.0689026	12388	4.093	0.195243	No	1
14.8667	-1.14392	0.00181949	0.0670873	12122	4.08357	0.189879	No	1
14.8833	-1.10456	0.0017569	0.0653182	11862	4.07416	0.186042	No	1
14.9	-1.09496	0.00174163	0.0635842	11608	4.06476	0.183018	No	1
14.9167	-1.06538	0.00169457	0.0619002	11360	4.05538	0.175979	No	1
14.9333	-1.00863	0.00160431	0.0602695	11118	4.04603	0.17217	No	1
14.95	-1.01734	0.00161816	0.0586641	10881	4.03667	0.171124	No	1
14.9667	-0.993247	0.00157984	0.0570826	10649	4.02731	0.167573	No	1
14.9833	-0.972662	0.0015471	0.055533	10423	4.01799	0.164777	No	1
15	-0.957571	0.00152309	0.0540131	10202	4.00869	0.161693	No	1
15.0167	-0.933782	0.00148526	0.0525255	9986	3.99939	0.15831	No	1
15.0333	-0.915333	0.00145591	0.0510736	9775	3.99012	0.154441	No	1
15.05	-0.886051	0.00140934	0.0496507	9568	3.98082	0.152508	No	1
15.0667	-0.890338	0.00141615	0.0482467	9366	3.97155	0.150763	No	1
15.0833	-0.863345	0.00137322	0.0468731	9169	3.96232	0.146341	No	1
15.1	-0.836657	0.00133077	0.045536	8976	3.95308	0.143245	No	1
15.1167	-0.825227	0.00131259	0.044223	8788	3.94389	0.141492	No	1
15.1333	-0.814256	0.00129514	0.0429367	8603	3.93465	0.137805	No	1
15.15	-0.780549	0.00124153	0.0416906	8423	3.92547	0.133075	No	1
15.1667	-0.757675	0.00120514	0.040482	8246	3.91624	0.12998	No	1
15.1833	-0.743041	0.00118187	0.039304	8074	3.90709	0.126701	No	1
15.2	-0.718184	0.00114233	0.0381587	7905	3.8979	0.123118	No	1
15.2167	-0.700194	0.00111371	0.0370444	7740	3.88874	0.120199	No	1
15.2333	-0.683118	0.00108656	0.0359577	7579	3.87961	0.117335	No	1
15.25	-0.665891	0.00105915	0.0348963	7421	3.87046	0.114912	No	1
15.2667	-0.654004	0.00104025	0.0338546	7267	3.86136	0.11321	No	1
15.2833	-0.645168	0.00102619	0.032832	7116	3.85224	0.110942	No	1
15.3	-0.626872	0.000997091	0.0318344	6968	3.84311	0.107905	No	1
15.3167	-0.609339	0.000969204	0.030863	6823	3.83398	0.105377	No	1
15.3333	-0.596995	0.000949568	0.0299188	6682	3.82491	0.102067	No	1
15.35	-0.570612	0.000907604	0.0290003	6543	3.81578	0.0998813	No	1
15.3667	-0.571237	0.000908598	0.0280951	6408	3.80672	0.0992636	No	1
15.3833	-0.562859	0.000895273	0.0271947	6275	3.79761	0.0989603	No	1
15.4	-0.567146	0.000902092	0.0262989	6145	3.78852	0.0983303	No	1
15.4167	-0.555106	0.000882942	0.0254204	6018	3.77945	0.0952462	No	1
15.4333	-0.53147	0.000845346	0.0245668	5894	3.77041	0.0929167	No	1
15.45	-0.528128	0.00084003	0.0237322	5772	3.76133	0.091142	No	1
15.4667	-0.5109	0.000812628	0.0229236	5653	3.75228	0.0872051	No	1
15.4833	-0.482991	0.000768237	0.0221508	5536	3.7432	0.0833145	No	1
15.5	-0.466374	0.000741805	0.021402	5422	3.73416	0.0819082	No	1
15.5167	-0.466846	0.000742557	0.0206641	5310	3.72509	0.0809381	No	1
15.5333	-0.455264	0.000724135	0.0199473	5200	3.716	0.0772704	No	1
15.55	-0.425067	0.000676103	0.019253	5093	3.70697	0.0759413	No	1
15.5667	-0.440188	0.000700154	0.0185654	4987	3.69784	0.0757854	No	1
15.5833	-0.423418	0.00067348	0.0178922	4884	3.68878	0.0727459	No	1
15.6	-0.405732	0.00064535	0.0172487	4783	3.6797	0.0691805	No	1
15.6167	-0.383011	0.00060921	0.0166378	4685	3.67071	0.065532	No	1
15.6333	-0.36441	0.000579624	0.0160531	4588	3.66162	0.063339	No	1
15.65	-0.358321	0.000569939	0.0154838	4493	3.65254	0.0620654	No	1
15.6667	-0.350249	0.000557099	0.014927	4400	3.64345	0.0605211	No	1
15.6833	-0.341108	0.000542561	0.0143773	4309	3.63438	0.0604289	No	1
15.7	-0.349668	0.000556175	0.0138292	4219	3.62521	0.0600783	No	1
15.7167	-0.337628	0.000537025	0.0132909	4132	3.61616	0.0581907	No	1
15.7333	-0.32864	0.000522729	0.01277	4046	3.60703	0.056155	No	1
15.75	-0.314922	0.000500909	0.0122684	3962	3.59791	0.053839	No	1
15.7667	-0.30273	0.000481516	0.0117832	3880	3.58883	0.0524266	No	1
15.7833	-0.299388	0.0004762	0.0112996	3799	3.57967	0.0533881	No	1
15.8	-0.314509	0.000500251	0.0108152	3719	3.57043	0.0524603	No	1
15.8167	-0.289499	0.000460471	0.0103529	3642	3.56134	0.0484333	No	1
15.8333	-0.268914	0.00042773	0.00991722	3566	3.55218	0.0465143	No	1
15.85	-0.268166	0.00042654	0.00949546	3491	3.54295	0.0452564	No	1
15.8667	-0.255211	0.000405933	0.0090849	3418	3.53377	0.0439322	No	1
15.8833	-0.2537	0.00040353	0.0086836	3346	3.52453	0.0430948	No	1
15.9	-0.24639	0.000391903	0.00829023	3276	3.51534	0.0420591	No	1
15.9167	-0.24259	0.000385859	0.00791049	3206	3.50596	0.0399882	No	1
15.9333	-0.223226	0.000355059	0.00754875	3139	3.49679	0.0380131	No	1
15.95	-0.220494	0.000350714	0.00719391	3072	3.48742	0.0383379	No	1
15.9667	-0.227986	0.00036263	0.00683844	3007	3.47813	0.0379805	No	1
15.9833	-0.217319	0.000345664	0.00648967	2943	3.46879	0.0367247	No	1
16	-0.214282	0.000340833	0.00614933	2880	3.45939	0.036002	No	1
16.0167	-0.209872	0.000333818	0.00581096	2819	3.4501	0.0361186	No	1
16.0333	-0.216753	0.000344763	0.00547499	2758	3.44059	0.0353029	No	1
16.05	-0.201356	0.000320274	0.00514719	2699	3.4312	0.0341921	No	1
16.0667	-0.204728	0.000325636	0.00483206	2641	3.42177	0.0324304	No	1
16.0833	-0.181549	0.000288769	0.00453462	2584	3.41229	0.0302665	No	1
16.1	-0.180038	0.000286365	0.00424644	2528	3.40278	0.0302894	No	1
16.1167	-0.182952	0.000291	0.00396134	2473	3.39322	0.029433	No	1
16.1333	-0.170912	0.00027185	0.00368707	2419	3.38364	0.0278322	No	1
16.15	-0.164824	0.000262165	0.0034302	2366	3.37401	0.0256211	No	1
16.1667	-0.145307	0.000231123	0.00319357	2314	3.36436	0.0234475	No	1
16.1833	-0.139523	0.000221923	0.00296463	2263	3.35468	0.0238521	No	1
16.2	-0.151287	0.000240635	0.00272978	2213	3.34498	0.0244877	No	1
16.2167	-0.148403	0.000236047	0.00249059	2164	3.33526	0.0245564	No	1
16.2333	-0.1533	0.000243837	0.0022529	2116	3.32552	0.0239905	No	1
16.25	-0.142634	0.000226871	0.0020164	2068	3.31555	0.024116	No	1
16.2667	-0.156076	0.000248252	0.00177842	2022	3.30578	0.02409	No	1
16.2833	-0.143579	0.000228374	0.00154909	1976	3.29579	0.022168	No	1
16.3	-0.13337	0.000212136	0.00132897	1931	3.28578	0.0220351	No	1
16.3167	-0.143151	0.000227693	0.00110069	1887	3.27577	0.023595	No	1
16.3333	-0.154304	0.000245433	0.000870807	1844	3.26576	0.0221496	No	1
16.35	-0.126243	0.000200799	0.00065838	1802	3.25575	0.0199236	No	1
16.3667	-0.127326	0.000202522	0.000460798	1760	3.24551	0.0190168	No	1
16.3833	-0.115896	0.000184342	0.000273388	1719	3.23528	0.0177364	No	1
16.4	-0.112096	0.000178298	9.13558e-05	1679	3.22505	0.0177775	No	1
