# Supplementary material for: Descriptive study and evaluation of shrink hoods with recycled content for regulatory compliance
Source: Research Square preprint supplement (doi:10.21203/rs.3.rs-6261320/v1), 2025-06-25
Supplement: Supplementary file 5 [file aac2bea9bd0248623ce1f014.xlsx]

## Sheet: Sample Details
Administrative Information
Export date	10 December 2024 09:42:07
Culture name	en-GB
Decimal separator	.
Workspace name	November 2024
Workspace path	C:\ProgramData\Agilent Technologies\GPC\Workspaces\2024\November 2024\
File name	ICF_04_12_2024-0002.sample
Creation date	05 December 2024 09:29:25
Created by	OBPC
Comments	Collected by Agilent GPC/SEC Software Version 2.1.9.34851
Software version	Agilent SEC Software - 2.1.9.34851
Sample Information
Sample name	B
Information
Sample type	Sample
Injection date	05 December 2024
Vial number	None
Injection number	1
Injection volume (µL)	200
Concentration (mg/mL)	1
dn/dc (mL/g)	0.1
UV extinction coefficient [(mg/mL)-¹][cm-¹]	1
Mp (g/mol)	100000
IV (dL/g)	0.5
Mark-Houwink K ((10e-5) dL/g)	14.1
Mark-Houwink Alpha	0.7
Analysed	Yes
Sample Instrument Conditions
Eluent
Eluent refractive index	1
Set flow rate (mL/min)	1
LS wavelength (nm)	650
Laser power (%)	0
Set detector temperature (°C)	0
Actual detector temperature (°C)	0
Actual flow rate (mL/min)	0
Column information
Data origin	Collected by Agilent GPC/SEC Software Version 2.1.9.34851
Instrument name	Agilent DataStream
Sample Collection Parameters
Collected by	OBPC
Number of channels	1
Run length (mins)	30.0167
Delay time (secs)	0
Sampling interval (secs)	1
Number of data points	1801
Sample DLS Parameters
Eluent refractive index	1
Eluent viscosity (P)	0.0089
DLS correlator run time (secs)	5
DLS Clip Time (µs)	100
DLS R²	0.4
Sample Channel Information
Channel ID	Detector type	Detector name	Detector units	Channel Information
1	RI	Trace0	mV

## Sheet: Raw Data
Sample Collection Parameters
Collected by	OBPC
Number of channels	1
Run length (mins)	30.0167
Delay time (secs)	0
Sampling interval (secs)	1
Number of data points	1801
Sample DLS Parameters
Eluent refractive index	1
Eluent viscosity (P)	0.0089
DLS correlator run time (secs)	5
DLS Clip Time (µs)	100
DLS R²	0.4
Sample Channel Information
Channel ID	Detector type	Detector name	Detector units	Channel Information
1	RI	Trace0	mV
Raw Data
RT (mins)	Response Trace 1
0	3.58379
0.0166667	3.50716
0.0333333	3.49007
0.05	3.50578
0.0666667	3.50075
0.0833333	3.51021
0.1	3.51387
0.116667	3.5099
0.133333	3.54469
0.15	3.54057
0.166667	3.52242
0.183333	3.5276
0.2	3.53203
0.216667	3.52928
0.233333	3.51982
0.25	3.53355
0.266667	3.54469
0.283333	3.55888
0.3	3.54118
0.316667	3.54927
0.333333	3.56239
0.35	3.55766
0.366667	3.56041
0.383333	3.55721
0.4	3.56346
0.416667	3.56712
0.433333	3.57277
0.45	3.57063
0.466667	3.56117
0.483333	3.54958
0.5	3.56071
0.516667	3.57109
0.533333	3.56712
0.55	3.56667
0.566667	3.5659
0.583333	3.57124
0.6	3.56071
0.616667	3.56163
0.633333	3.54195
0.65	3.51234
0.666667	3.50807
0.683333	3.5006
0.7	3.50868
0.716667	3.49678
0.733333	3.50945
0.75	3.5128
0.766667	3.51433
0.783333	3.48579
0.8	3.47771
0.816667	3.5009
0.833333	3.50502
0.85	3.5041
0.866667	3.507
0.883333	3.50456
0.9	3.50334
0.916667	3.5273
0.933333	3.5215
0.95	3.52638
0.966667	3.51707
0.983333	3.51311
1	3.51448
1.01667	3.51769
1.03333	3.52135
1.05	3.52364
1.06667	3.51372
1.08333	3.50136
1.1	3.50441
1.11667	3.50975
1.13333	3.52837
1.15	3.52409
1.16667	3.51723
1.18333	3.5273
1.2	3.51082
1.21667	3.52089
1.23333	3.52776
1.25	3.52791
1.26667	3.53294
1.28333	3.54225
1.3	3.53783
1.31667	3.52837
1.33333	3.52928
1.35	3.53218
1.36667	3.53676
1.38333	3.52791
1.4	3.52837
1.41667	3.53096
1.43333	3.5273
1.45	3.55278
1.46667	3.54179
1.48333	3.52699
1.5	3.53264
1.51667	3.53691
1.53333	3.54912
1.55	3.57582
1.56667	3.57872
1.58333	3.55248
1.6	3.53981
1.61667	3.54942
1.63333	3.56453
1.65	3.55934
1.66667	3.56865
1.68333	3.56865
1.7	3.55446
1.71667	3.55705
1.73333	3.55843
1.75	3.5743
1.76667	3.5569
1.78333	3.56224
1.8	3.56209
1.81667	3.56499
1.83333	3.55186
1.85	3.55522
1.86667	3.55156
1.88333	3.56178
1.9	3.57277
1.91667	3.58269
1.93333	3.58269
1.95	3.58788
1.96667	3.58101
1.98333	3.58803
2	3.58574
2.01667	3.60466
2.03333	3.58711
2.05	3.58864
2.06667	3.59184
2.08333	3.58559
2.1	3.57521
2.11667	3.57597
2.13333	3.58513
2.15	3.58482
2.16667	3.59886
2.18333	3.59947
2.2	3.59322
2.21667	3.58116
2.23333	3.58665
2.25	3.60222
2.26667	3.59505
2.28333	3.58894
2.3	3.57903
2.31667	3.57704
2.33333	3.57307
2.35	3.59306
2.36667	3.61259
2.38333	3.61458
2.4	3.63335
2.41667	3.62618
2.43333	3.62877
2.45	3.61168
2.46667	3.61031
2.48333	3.61198
2.5	3.6245
2.51667	3.60298
2.53333	3.58849
2.55	3.59077
2.56667	3.61443
2.58333	3.61107
2.6	3.59581
2.61667	3.61458
2.63333	3.6248
2.65	3.62373
2.66667	3.60802
2.68333	3.6097
2.7	3.62602
2.71667	3.62587
2.73333	3.62923
2.75	3.62999
2.76667	3.61839
2.78333	3.61916
2.8	3.62648
2.81667	3.6248
2.83333	3.619
2.85	3.63289
2.86667	3.62465
2.88333	3.62694
2.9	3.63457
2.91667	3.63503
2.93333	3.62923
2.95	3.61778
2.96667	3.62846
2.98333	3.60588
3	3.61412
3.01667	3.61015
3.03333	3.61488
3.05	3.62282
3.06667	3.60985
3.08333	3.62633
3.1	3.62953
3.11667	3.6303
3.13333	3.6274
3.15	3.62816
3.16667	3.64189
3.18333	3.62007
3.2	3.63091
3.21667	3.63441
3.23333	3.63228
3.25	3.63075
3.26667	3.6248
3.28333	3.60985
3.3	3.60054
3.31667	3.61855
3.33333	3.60786
3.35	3.60924
3.36667	3.59917
3.38333	3.59123
3.4	3.6161
3.41667	3.62862
3.43333	3.63792
3.45	3.6245
3.46667	3.64372
3.48333	3.64677
3.5	3.64006
3.51667	3.64738
3.53333	3.63625
3.55	3.6338
3.56667	3.6303
3.58333	3.63503
3.6	3.63792
3.61667	3.64296
3.63333	3.63167
3.65	3.63609
3.66667	3.63274
3.68333	3.64388
3.7	3.64586
3.71667	3.63045
3.73333	3.61794
3.75	3.6303
3.76667	3.63319
3.78333	3.64326
3.8	3.63274
3.81667	3.64479
3.83333	3.63197
3.85	3.63304
3.86667	3.63503
3.88333	3.64052
3.9	3.63564
3.91667	3.64037
3.93333	3.63945
3.95	3.65593
3.96667	3.65974
3.98333	3.64922
4	3.65593
4.01667	3.6422
4.03333	3.63228
4.05	3.6219
4.06667	3.61855
4.08333	3.6248
4.1	3.61931
4.11667	3.63319
4.13333	3.62724
4.15	3.62968
4.16667	3.62633
4.18333	3.63289
4.2	3.62251
4.21667	3.62373
4.23333	3.61458
4.25	3.6129
4.26667	3.61916
4.28333	3.62648
4.3	3.62129
4.31667	3.62129
4.33333	3.61534
4.35	3.60207
4.36667	3.6097
4.38333	3.63091
4.4	3.63335
4.41667	3.63915
4.43333	3.63213
4.45	3.62144
4.46667	3.61977
4.48333	3.6277
4.5	3.63777
4.51667	3.64403
4.53333	3.63777
4.55	3.63258
4.56667	3.60664
4.58333	3.63167
4.6	3.62831
4.61667	3.61244
4.63333	3.61092
4.65	3.60497
4.66667	3.6129
4.68333	3.62892
4.7	3.63228
4.71667	3.62434
4.73333	3.62404
4.75	3.62465
4.76667	3.62114
4.78333	3.62999
4.8	3.6187
4.81667	3.62053
4.83333	3.64082
4.85	3.62862
4.86667	3.63716
4.88333	3.62007
4.9	3.61534
4.91667	3.63121
4.93333	3.63609
4.95	3.61641
4.96667	3.6219
4.98333	3.6303
5	3.61687
5.01667	3.60298
5.03333	3.60374
5.05	3.60359
5.06667	3.60252
5.08333	3.61595
5.1	3.61244
5.11667	3.62038
5.13333	3.63152
5.15	3.61397
5.16667	3.60985
5.18333	3.60893
5.2	3.61137
5.21667	3.619
5.23333	3.62328
5.25	3.6097
5.26667	3.59596
5.28333	3.60268
5.3	3.61061
5.31667	3.61946
5.33333	3.61259
5.35	3.62282
5.36667	3.61153
5.38333	3.59444
5.4	3.59703
5.41667	3.60939
5.43333	3.58864
5.45	3.59154
5.46667	3.60497
5.48333	3.59795
5.5	3.59764
5.51667	3.60741
5.53333	3.59077
5.55	3.58025
5.56667	3.58467
5.58333	3.58467
5.6	3.59077
5.61667	3.59184
5.63333	3.5955
5.65	3.59245
5.66667	3.58513
5.68333	3.60374
5.7	3.58894
5.71667	3.56545
5.73333	3.58696
5.75	3.57521
5.76667	3.56728
5.78333	3.57887
5.8	3.59779
5.81667	3.59856
5.83333	3.59642
5.85	3.58543
5.86667	3.58254
5.88333	3.59566
5.9	3.58437
5.91667	3.60603
5.93333	3.59962
5.95	3.57567
5.96667	3.58971
5.98333	3.58818
6	3.58955
6.01667	3.58589
6.03333	3.59413
6.05	3.59337
6.06667	3.58315
6.08333	3.58696
6.1	3.56834
6.11667	3.55278
6.13333	3.55965
6.15	3.56834
6.16667	3.57903
6.18333	3.57094
6.2	3.58116
6.21667	3.59444
6.23333	3.58208
6.25	3.58315
6.26667	3.58711
6.28333	3.57155
6.3	3.57521
6.31667	3.57048
6.33333	3.55598
6.35	3.56957
6.36667	3.57201
6.38333	3.58788
6.4	3.57613
6.41667	3.5537
6.43333	3.56682
6.45	3.59978
6.46667	3.58299
6.48333	3.58772
6.5	3.58162
6.51667	3.58009
6.53333	3.57735
6.55	3.55965
6.56667	3.56575
6.58333	3.58009
6.6	3.57903
6.61667	3.58711
6.63333	3.58192
6.65	3.58299
6.66667	3.56804
6.68333	3.57048
6.7	3.55934
6.71667	3.5688
6.73333	3.58543
6.75	3.5891
6.76667	3.5627
6.78333	3.56575
6.8	3.5627
6.81667	3.57765
6.83333	3.57018
6.85	3.56041
6.86667	3.55171
6.88333	3.5598
6.9	3.57445
6.91667	3.55385
6.93333	3.5601
6.95	3.56209
6.96667	3.57246
6.98333	3.56483
7	3.55339
7.01667	3.57658
7.03333	3.55797
7.05	3.55537
7.06667	3.54378
7.08333	3.53477
7.1	3.55873
7.11667	3.54149
7.13333	3.53279
7.15	3.53798
7.16667	3.53157
7.18333	3.53386
7.2	3.53371
7.21667	3.54866
7.23333	3.5421
7.25	3.5537
7.26667	3.545
7.28333	3.53844
7.3	3.53081
7.31667	3.53951
7.33333	3.52837
7.35	3.53233
7.36667	3.52608
7.38333	3.53279
7.4	3.55339
7.41667	3.55232
7.43333	3.54652
7.45	3.52974
7.46667	3.53355
7.48333	3.53218
7.5	3.53294
7.51667	3.53218
7.53333	3.53233
7.55	3.52333
7.56667	3.53706
7.58333	3.53737
7.6	3.53279
7.61667	3.5363
7.63333	3.54347
7.65	3.54042
7.66667	3.53539
7.68333	3.54347
7.7	3.54179
7.71667	3.53981
7.73333	3.5421
7.75	3.53569
7.76667	3.53432
7.78333	3.53325
7.8	3.51646
7.81667	3.49419
7.83333	3.51906
7.85	3.51982
7.86667	3.52318
7.88333	3.5273
7.9	3.51418
7.91667	3.49525
7.93333	3.49876
7.95	3.51021
7.96667	3.50975
7.98333	3.51723
8	3.49983
8.01667	3.51418
8.03333	3.52684
8.05	3.53111
8.06667	3.52852
8.08333	3.51707
8.1	3.51326
8.11667	3.51006
8.13333	3.52654
8.15	3.51326
8.16667	3.5186
8.18333	3.51295
8.2	3.51692
8.21667	3.53172
8.23333	3.54454
8.25	3.5302
8.26667	3.54164
8.28333	3.54012
8.3	3.5334
8.31667	3.5479
8.33333	3.54958
8.35	3.54668
8.36667	3.53889
8.38333	3.52821
8.4	3.50838
8.41667	3.52181
8.43333	3.50929
8.45	3.51234
8.46667	3.5157
8.48333	3.51158
8.5	3.52592
8.51667	3.50441
8.53333	3.50777
8.55	3.50182
8.56667	3.51051
8.58333	3.51051
8.6	3.51128
8.61667	3.51921
8.63333	3.51769
8.65	3.51921
8.66667	3.49907
8.68333	3.49876
8.7	3.50716
8.71667	3.49297
8.73333	3.50304
8.75	3.50273
8.76667	3.48213
8.78333	3.48473
8.8	3.5009
8.81667	3.49785
8.83333	3.49373
8.85	3.49144
8.86667	3.48503
8.88333	3.48061
8.9	3.47862
8.91667	3.47618
8.93333	3.5009
8.95	3.4893
8.96667	3.49312
8.98333	3.49648
9	3.47893
9.01667	3.48824
9.03333	3.49113
9.05	3.47588
9.06667	3.47679
9.08333	3.48656
9.1	3.47481
9.11667	3.45634
9.13333	3.45833
9.15	3.46764
9.16667	3.46733
9.18333	3.46581
9.2	3.46672
9.21667	3.46169
9.23333	3.45207
9.25	3.47008
9.26667	3.46458
9.28333	3.46458
9.3	3.46001
9.31667	3.4565
9.33333	3.45909
9.35	3.45619
9.36667	3.4594
9.38333	3.46962
9.4	3.46016
9.41667	3.44719
9.43333	3.4417
9.45	3.45467
9.46667	3.45985
9.48333	3.45772
9.5	3.46031
9.51667	3.45879
9.53333	3.46947
9.55	3.48122
9.56667	3.48122
9.58333	3.4655
9.6	3.46169
9.61667	3.46413
9.63333	3.46733
9.65	3.45787
9.66667	3.45268
9.68333	3.45055
9.7	3.46382
9.71667	3.46565
9.73333	3.46352
9.75	3.46977
9.76667	3.45207
9.78333	3.46428
9.8	3.47115
9.81667	3.47206
9.83333	3.48137
9.85	3.46474
9.86667	3.48106
9.88333	3.46993
9.9	3.46825
9.91667	3.46733
9.93333	3.47954
9.95	3.46977
9.96667	3.46108
9.98333	3.46352
10	3.46504
10.0167	3.46855
10.0333	3.45909
10.05	3.44856
10.0667	3.42796
10.0833	3.43498
10.1	3.42491
10.1167	3.4182
10.1333	3.43163
10.15	3.45833
10.1667	3.45589
10.1833	3.45436
10.2	3.45146
10.2167	3.451
10.2333	3.43971
10.25	3.4359
10.2667	3.43483
10.2833	3.43849
10.3	3.44093
10.3167	3.43147
10.3333	3.38905
10.35	3.3947
10.3667	3.40767
10.3833	3.40446
10.4	3.39088
10.4167	3.39699
10.4333	3.40187
10.45	3.40065
10.4667	3.40172
10.4833	3.39195
10.5	3.40721
10.5167	3.40385
10.5333	3.40736
10.55	3.41194
10.5667	3.4243
10.5833	3.42659
10.6	3.41682
10.6167	3.40767
10.6333	3.4124
10.65	3.40645
10.6667	3.40889
10.6833	3.41774
10.7	3.39684
10.7167	3.38676
10.7333	3.38921
10.75	3.37746
10.7667	3.386
10.7833	3.38783
10.8	3.3828
10.8167	3.3683
10.8333	3.35045
10.85	3.3358
10.8667	3.33519
10.8833	3.33672
10.9	3.33748
10.9167	3.31154
10.9333	3.30559
10.95	3.30772
10.9667	3.28987
10.9833	3.29186
11	3.28941
11.0167	3.29048
11.0333	3.29033
11.05	3.27431
11.0667	3.25966
11.0833	3.23372
11.1	3.21602
11.1167	3.22685
11.1333	3.24379
11.15	3.21571
11.1667	3.21022
11.1833	3.20457
11.2	3.18398
11.2167	3.17055
11.2333	3.17986
11.25	3.16536
11.2667	3.14247
11.2833	3.1353
11.3	3.10646
11.3167	3.09563
11.3333	3.09654
11.35	3.07182
11.3667	3.04436
11.3833	3.03322
11.4	3.01338
11.4167	2.98866
11.4333	2.97356
11.45	2.95189
11.4667	2.9464
11.4833	2.9232
11.5	2.89894
11.5167	2.86171
11.5333	2.8376
11.55	2.80678
11.5667	2.79915
11.5833	2.77519
11.6	2.7404
11.6167	2.70943
11.6333	2.68181
11.65	2.63481
11.6667	2.60078
11.6833	2.59697
11.7	2.57042
11.7167	2.53975
11.7333	2.4926
11.75	2.45537
11.7667	2.44148
11.7833	2.40944
11.8	2.36382
11.8167	2.32155
11.8333	2.29561
11.85	2.24388
11.8667	2.21626
11.8833	2.19017
11.9	2.17217
11.9167	2.12517
11.9333	2.07771
11.95	2.04979
11.9667	2.02248
11.9833	1.96754
12	1.91872
12.0167	1.87782
12.0333	1.838
12.05	1.80794
12.0667	1.76247
12.0833	1.71165
12.1	1.67015
12.1167	1.62865
12.1333	1.58867
12.15	1.54625
12.1667	1.51604
12.1833	1.48964
12.2	1.43471
12.2167	1.38466
12.2333	1.34224
12.25	1.31248
12.2667	1.26762
12.2833	1.18889
12.3	1.15639
12.3167	1.12068
12.3333	1.0775
12.35	1.05141
12.3667	1.00502
12.3833	0.954971
12.4	0.9095
12.4167	0.865707
12.4333	0.81871
12.45	0.763474
12.4667	0.728836
12.4833	0.685349
12.5	0.624161
12.5167	0.597
12.5333	0.560226
12.55	0.514755
12.5667	0.482407
12.5833	0.449142
12.6	0.394974
12.6167	0.356979
12.6333	0.308151
12.65	0.283279
12.6667	0.252609
12.6833	0.226212
12.7	0.204391
12.7167	0.18013
12.7333	0.14534
12.75	0.125198
12.7667	0.089035
12.7833	0.0708771
12.8	0.0557709
12.8167	0.0251007
12.8333	0.00724793
12.85	0.00587463
12.8667	-0.00968933
12.8833	-0.0296783
12.9	-0.0249481
12.9167	-0.0328827
12.9333	-0.0571442
12.95	-0.0702667
12.9667	-0.0926971
12.9833	-0.0879669
13	-0.089798
13.0167	-0.0884247
13.0333	-0.0849152
13.05	-0.089035
13.0667	-0.0876617
13.0833	-0.0777435
13.1	-0.0849152
13.1167	-0.0730133
13.1333	-0.0574493
13.15	-0.0566864
13.1667	-0.0559235
13.1833	-0.0318146
13.2	-0.0199127
13.2167	-0.00740051
13.2333	0.0223541
13.25	0.0362396
13.2667	0.0609589
13.2833	0.0792694
13.3	0.0992584
13.3167	0.120621
13.3333	0.142899
13.35	0.141068
13.3667	0.166702
13.3833	0.209274
13.4	0.235977
13.4167	0.256577
13.4333	0.286636
13.45	0.299759
13.4667	0.323257
13.4833	0.352554
13.5	0.364761
13.5167	0.399246
13.5333	0.412521
13.55	0.441818
13.5667	0.4673
13.5833	0.477524
13.6	0.50499
13.6167	0.519638
13.6333	0.555801
13.65	0.595169
13.6667	0.600815
13.6833	0.628738
13.7	0.657883
13.7167	0.682144
13.7333	0.715408
13.75	0.761185
13.7667	0.796738
13.7833	0.813217
13.8	0.844803
13.8167	0.873642
13.8333	0.930252
13.85	0.954361
13.8667	0.988846
13.8833	1.03676
13.9	1.07994
13.9167	1.10771
13.9333	1.14632
13.95	1.17699
13.9667	1.20354
13.9833	1.22429
14	1.26503
14.0167	1.29234
14.0333	1.32607
14.05	1.36238
14.0667	1.39977
14.0833	1.43608
14.1	1.4666
14.1167	1.50352
14.1333	1.5374
14.15	1.56899
14.1667	1.61461
14.1833	1.63734
14.2	1.66618
14.2167	1.70067
14.2333	1.72279
14.25	1.7469
14.2667	1.79894
14.2833	1.83189
14.3	1.84792
14.3167	1.88957
14.3333	1.9204
14.35	1.95244
14.3667	1.96785
14.3833	1.99913
14.4	2.03758
14.4167	2.05345
14.4333	2.07771
14.45	2.12013
14.4667	2.1508
14.4833	2.19322
14.5	2.21092
14.5167	2.24068
14.5333	2.24754
14.55	2.28935
14.5667	2.31194
14.5833	2.32155
14.6	2.3542
14.6167	2.35786
14.6333	2.37556
14.65	2.4073
14.6667	2.42409
14.6833	2.44713
14.7	2.45781
14.7167	2.47932
14.7333	2.5071
14.75	2.52159
14.7667	2.53319
14.7833	2.55074
14.8	2.56676
14.8167	2.58842
14.8333	2.60414
14.85	2.62138
14.8667	2.64259
14.8833	2.63939
14.9	2.65785
14.9167	2.67677
14.9333	2.68578
14.95	2.69142
14.9667	2.72011
14.9833	2.71584
15	2.72896
15.0167	2.75322
15.0333	2.7729
15.05	2.76894
15.0667	2.80434
15.0833	2.81273
15.1	2.8199
15.1167	2.82112
15.1333	2.8434
15.15	2.85622
15.1667	2.86018
15.1833	2.85942
15.2	2.87254
15.2167	2.88384
15.2333	2.90092
15.25	2.92076
15.2667	2.90657
15.2833	2.90672
15.3	2.911
15.3167	2.9287
15.3333	2.94456
15.35	2.9464
15.3667	2.95692
15.3833	2.96227
15.4	2.9937
15.4167	2.99049
15.4333	3.01674
15.45	3.03474
15.4667	3.02925
15.4833	3.06175
15.5	3.06618
15.5167	3.0761
15.5333	3.07503
15.55	3.0648
15.5667	3.08189
15.5833	3.09151
15.6	3.08769
15.6167	3.07884
15.6333	3.09196
15.65	3.10616
15.6667	3.11836
15.6833	3.12202
15.7	3.12889
15.7167	3.13087
15.7333	3.13881
15.75	3.15361
15.7667	3.14674
15.7833	3.14903
15.8	3.16505
15.8167	3.15865
15.8333	3.16002
15.85	3.17162
15.8667	3.16658
15.8833	3.18932
15.9	3.18916
15.9167	3.19923
15.9333	3.19908
15.95	3.20045
15.9667	3.18291
15.9833	3.20107
16	3.20793
16.0167	3.21434
16.0333	3.21449
16.05	3.22441
16.0667	3.2296
16.0833	3.25325
16.1	3.25523
16.1167	3.25218
16.1333	3.23891
16.15	3.25233
16.1667	3.25768
16.1833	3.24379
16.2	3.23662
16.2167	3.2383
16.2333	3.25142
16.25	3.26027
16.2667	3.26347
16.2833	3.2618
16.3	3.26897
16.3167	3.27049
16.3333	3.26088
16.35	3.26134
16.3667	3.27614
16.3833	3.27827
16.4	3.28987
16.4167	3.28667
16.4333	3.29445
16.45	3.30147
16.4667	3.283
16.4833	3.28606
16.5	3.3036
16.5167	3.30574
16.5333	3.2859
16.55	3.29918
16.5667	3.29826
16.5833	3.30772
16.6	3.3033
16.6167	3.30788
16.6333	3.30772
16.65	3.32237
16.6667	3.29994
16.6833	3.30437
16.7	3.31108
16.7167	3.30513
16.7333	3.31505
16.75	3.32039
16.7667	3.31978
16.7833	3.33092
16.8	3.32115
16.8167	3.31139
16.8333	3.31276
16.85	3.31459
16.8667	3.30788
16.8833	3.30605
16.9	3.31398
16.9167	3.30208
16.9333	3.31917
16.95	3.32115
16.9667	3.31627
16.9833	3.31062
17	3.31963
17.0167	3.32191
17.0333	3.3271
17.05	3.31276
17.0667	3.3152
17.0833	3.31856
17.1	3.33778
17.1167	3.33214
17.1333	3.31993
17.15	3.31245
17.1667	3.31856
17.1833	3.31306
17.2	3.31444
17.2167	3.31184
17.2333	3.3094
17.25	3.3004
17.2667	3.32008
17.2833	3.30467
17.3	3.28774
17.3167	3.29582
17.3333	3.29887
17.35	3.29765
17.3667	3.2856
17.3833	3.29735
17.4	3.30071
17.4167	3.29491
17.4333	3.31184
17.45	3.30254
17.4667	3.30544
17.4833	3.29552
17.5	3.28468
17.5167	3.30101
17.5333	3.29079
17.55	3.29826
17.5667	3.30315
17.5833	3.29308
17.6	3.29216
17.6167	3.28194
17.6333	3.28941
17.65	3.27782
17.6667	3.283
17.6833	3.27827
17.7	3.29445
17.7167	3.29933
17.7333	3.29903
17.75	3.29765
17.7667	3.3094
17.7833	3.31993
17.8	3.32771
17.8167	3.30467
17.8333	3.29811
17.85	3.29811
17.8667	3.29124
17.8833	3.30559
17.9	3.30879
17.9167	3.29292
17.9333	3.29674
17.95	3.28865
17.9667	3.29308
17.9833	3.28682
18	3.29216
18.0167	3.28163
18.0333	3.28346
18.05	3.28468
18.0667	3.29384
18.0833	3.2766
18.1	3.27248
18.1167	3.27873
18.1333	3.29094
18.15	3.2943
18.1667	3.2859
18.1833	3.28758
18.2	3.28712
18.2167	3.29506
18.2333	3.2856
18.25	3.29369
18.2667	3.28758
18.2833	3.28331
18.3	3.28972
18.3167	3.31169
18.3333	3.31963
18.35	3.3213
18.3667	3.30925
18.3833	3.31306
18.4	3.321
18.4167	3.30177
18.4333	3.31078
18.45	3.31566
18.4667	3.31841
18.4833	3.3094
18.5	3.3213
18.5167	3.33336
18.5333	3.33565
18.55	3.32329
18.5667	3.31413
18.5833	3.32024
18.6	3.32344
18.6167	3.34251
18.6333	3.34068
18.65	3.34419
18.6667	3.32939
18.6833	3.34343
18.7	3.35945
18.7167	3.35655
18.7333	3.35533
18.75	3.36357
18.7667	3.36433
18.7833	3.37212
18.8	3.37471
18.8167	3.38936
18.8333	3.39607
18.85	3.39958
18.8667	3.40828
18.8833	3.41972
18.9	3.43697
18.9167	3.45741
18.9333	3.45802
18.95	3.46306
18.9667	3.47359
18.9833	3.48305
19	3.49587
19.0167	3.49327
19.0333	3.50731
19.05	3.53935
19.0667	3.54363
19.0833	3.55141
19.1	3.54591
19.1167	3.55186
19.1333	3.56377
19.15	3.5717
19.1667	3.56224
19.1833	3.57643
19.2	3.56453
19.2167	3.57582
19.2333	3.5807
19.25	3.59337
19.2667	3.59261
19.2833	3.58788
19.3	3.58421
19.3167	3.59322
19.3333	3.59261
19.35	3.60252
19.3667	3.63548
19.3833	3.648
19.4	3.66936
19.4167	3.6747
19.4333	3.69896
19.45	3.72276
19.4667	3.76564
19.4833	3.80318
19.5	3.85933
19.5167	3.89687
19.5333	3.95332
19.55	4.04442
19.5667	4.10576
19.5833	4.19121
19.6	4.28352
19.6167	4.38942
19.6333	4.50005
19.65	4.60823
19.6667	4.70543
19.6833	4.79256
19.7	4.89494
19.7167	4.99535
19.7333	5.06996
19.75	5.13451
19.7667	5.17799
19.7833	5.20409
19.8	5.20119
19.8167	5.2079
19.8333	5.18166
19.85	5.14504
19.8667	5.10613
19.8833	5.04005
19.9	4.98711
19.9167	4.90013
19.9333	4.82368
19.95	4.74358
19.9667	4.65523
19.9833	4.57726
20	4.50783
20.0167	4.41811
20.0333	4.34731
20.05	4.28871
20.0667	4.22447
20.0833	4.16237
20.1	4.09401
20.1167	4.05174
20.1333	3.98552
20.15	3.92708
20.1667	3.85033
20.1833	3.77281
20.2	3.70811
20.2167	3.64601
20.2333	3.53889
20.25	3.41927
20.2667	3.27873
20.2833	3.1321
20.3	2.92595
20.3167	2.71996
20.3333	2.45064
20.35	2.15279
20.3667	1.82594
20.3833	1.44127
20.4	1.01509
20.4167	0.567246
20.4333	0.0634003
20.45	-0.493546
20.4667	-1.09871
20.4833	-1.71333
20.5	-2.33513
20.5167	-2.95998
20.5333	-3.58467
20.55	-4.20631
20.5667	-4.82903
20.5833	-5.38033
20.6	-5.88081
20.6167	-6.34026
20.6333	-6.72997
20.65	-7.0562
20.6667	-7.32506
20.6833	-7.5193
20.7	-7.63222
20.7167	-7.67204
20.7333	-7.64809
20.75	-7.56264
20.7667	-7.44453
20.7833	-7.25517
20.8	-7.01775
20.8167	-6.7794
20.8333	-6.51558
20.85	-6.24916
20.8667	-5.97023
20.8833	-5.68672
20.9	-5.41008
20.9167	-5.10887
20.9333	-4.8307
20.95	-4.56734
20.9667	-4.32045
20.9833	-4.07661
21	-3.84056
21.0167	-3.61153
21.0333	-3.38448
21.05	-3.15926
21.0667	-2.95448
21.0833	-2.72163
21.1	-2.50465
21.1167	-2.29103
21.1333	-2.07848
21.15	-1.86531
21.1667	-1.64833
21.1833	-1.43211
21.2	-1.22124
21.2167	-1.02119
21.2333	-0.80452
21.25	-0.603714
21.2667	-0.412216
21.2833	-0.222397
21.3	-0.0556183
21.3167	0.127792
21.3333	0.277786
21.35	0.451889
21.3667	0.599442
21.3833	0.734482
21.4	0.862808
21.4167	0.977097
21.4333	1.11153
21.45	1.22337
21.4667	1.33812
21.4833	1.4399
21.5	1.52367
21.5167	1.59157
21.5333	1.6964
21.55	1.76628
21.5667	1.82564
21.5833	1.88423
21.6	1.97884
21.6167	2.0443
21.6333	2.0742
21.65	2.12898
21.6667	2.17781
21.6833	2.23228
21.7	2.27165
21.7167	2.32018
21.7333	2.35054
21.75	2.37465
21.7667	2.41356
21.7833	2.4482
21.8	2.46513
21.8167	2.50206
21.8333	2.53624
21.85	2.53807
21.8667	2.57271
21.8833	2.60262
21.9	2.63313
21.9167	2.66502
21.9333	2.66518
21.95	2.6783
21.9667	2.69844
21.9833	2.72026
22	2.74467
22.0167	2.76634
22.0333	2.7697
22.05	2.7755
22.0667	2.81807
22.0833	2.84447
22.1	2.84767
22.1167	2.85347
22.1333	2.86171
22.15	2.86537
22.1667	2.88338
22.1833	2.89772
22.2	2.91832
22.2167	2.93663
22.2333	2.9351
22.25	2.92336
22.2667	2.94868
22.2833	2.94914
22.3	2.97325
22.3167	2.9734
22.3333	2.99126
22.35	2.99904
22.3667	3.01018
22.3833	3.01033
22.4	3.01109
22.4167	3.02071
22.4333	3.03352
22.45	3.04527
22.4667	3.04497
22.4833	3.04573
22.5	3.05046
22.5167	3.04817
22.5333	3.05305
22.55	3.06877
22.5667	3.08479
22.5833	3.06862
22.6	3.08373
22.6167	3.08586
22.6333	3.08891
22.65	3.09563
22.6667	3.09731
22.6833	3.106
22.7	3.09517
22.7167	3.11272
22.7333	3.11516
22.75	3.1208
22.7667	3.11867
22.7833	3.12492
22.8	3.1385
22.8167	3.14186
22.8333	3.1353
22.85	3.1472
22.8667	3.15559
22.8833	3.16734
22.9	3.16048
22.9167	3.16734
22.9333	3.18657
22.95	3.20274
22.9667	3.19023
22.9833	3.18871
23	3.19283
23.0167	3.19893
23.0333	3.20229
23.05	3.19908
23.0667	3.20183
23.0833	3.20457
23.1	3.19679
23.1167	3.20351
23.1333	3.19786
23.15	3.21159
23.1667	3.23494
23.1833	3.2354
23.2	3.22212
23.2167	3.22548
23.2333	3.2328
23.25	3.22914
23.2667	3.22609
23.2833	3.23051
23.3	3.23921
23.3167	3.23631
23.3333	3.26103
23.35	3.25951
23.3667	3.27461
23.3833	3.27904
23.4	3.28102
23.4167	3.28789
23.4333	3.30132
23.45	3.28529
23.4667	3.27934
23.4833	3.28728
23.5	3.2795
23.5167	3.29063
23.5333	3.28209
23.55	3.28896
23.5667	3.29399
23.5833	3.28804
23.6	3.2795
23.6167	3.27766
23.6333	3.28194
23.65	3.29124
23.6667	3.29384
23.6833	3.3123
23.7	3.33443
23.7167	3.34114
23.7333	3.31352
23.75	3.33046
23.7667	3.3268
23.7833	3.31047
23.8	3.3213
23.8167	3.33305
23.8333	3.3474
23.85	3.34053
23.8667	3.32726
23.8833	3.31734
23.9	3.31535
23.9167	3.31993
23.9333	3.32191
23.95	3.32191
23.9667	3.33183
23.9833	3.33565
24	3.33214
24.0167	3.33641
24.0333	3.33595
24.05	3.33366
24.0667	3.32741
24.0833	3.33611
24.1	3.35426
24.1167	3.36388
24.1333	3.36769
24.15	3.34938
24.1667	3.3535
24.1833	3.36998
24.2	3.35197
24.2167	3.34511
24.2333	3.35197
24.25	3.3622
24.2667	3.36952
24.2833	3.36327
24.3	3.36403
24.3167	3.36281
24.3333	3.36266
24.35	3.37044
24.3667	3.37227
24.3833	3.37257
24.4	3.38921
24.4167	3.38692
24.4333	3.37715
24.45	3.3828
24.4667	3.38997
24.4833	3.38371
24.5	3.38554
24.5167	3.37975
24.5333	3.38066
24.55	3.37593
24.5667	3.37715
24.5833	3.38448
24.6	3.37914
24.6167	3.39943
24.6333	3.39043
24.65	3.37517
24.6667	3.37547
24.6833	3.37593
24.7	3.38478
24.7167	3.37807
24.7333	3.38478
24.75	3.38219
24.7667	3.37242
24.7833	3.35991
24.8	3.36723
24.8167	3.37776
24.8333	3.37547
24.85	3.38036
24.8667	3.38097
24.8833	3.38738
24.9	3.37379
24.9167	3.37242
24.9333	3.37196
24.95	3.37288
24.9667	3.38875
24.9833	3.386
25	3.38219
25.0167	3.39439
25.0333	3.38844
25.05	3.39256
25.0667	3.39226
25.0833	3.39928
25.1	3.39058
25.1167	3.38188
25.1333	3.3918
25.15	3.40675
25.1667	3.39775
25.1833	3.38692
25.2	3.39439
25.2167	3.39134
25.2333	3.4063
25.25	3.39882
25.2667	3.39149
25.2833	3.38921
25.3	3.3918
25.3167	3.38554
25.3333	3.39424
25.35	3.3979
25.3667	3.40263
25.3833	3.39699
25.4	3.40523
25.4167	3.41484
25.4333	3.41515
25.45	3.4211
25.4667	3.42339
25.4833	3.42262
25.5	3.39867
25.5167	3.41713
25.5333	3.40279
25.55	3.40797
25.5667	3.3947
25.5833	3.40996
25.6	3.42079
25.6167	3.40904
25.6333	3.42827
25.65	3.42278
25.6667	3.40553
25.6833	3.42445
25.7	3.43636
25.7167	3.43269
25.7333	3.43422
25.75	3.43163
25.7667	3.43651
25.7833	3.44856
25.8	3.46397
25.8167	3.44521
25.8333	3.45131
25.85	3.4304
25.8667	3.43452
25.8833	3.42552
25.9	3.41576
25.9167	3.42262
25.9333	3.43849
25.95	3.42354
25.9667	3.39409
25.9833	3.41652
26	3.40935
26.0167	3.39394
26.0333	3.38249
26.05	3.39256
26.0667	3.40019
26.0833	3.40385
26.1	3.39836
26.1167	3.39912
26.1333	3.39729
26.15	3.38829
26.1667	3.40309
26.1833	3.40401
26.2	3.38509
26.2167	3.3773
26.2333	3.38066
26.25	3.38722
26.2667	3.40706
26.2833	3.42094
26.3	3.41179
26.3167	3.39561
26.3333	3.38676
26.35	3.39272
26.3667	3.3976
26.3833	3.40096
26.4	3.40965
26.4167	3.39409
26.4333	3.40202
26.45	3.40935
26.4667	3.41896
26.4833	3.41667
26.5	3.39424
26.5167	3.39073
26.5333	3.38417
26.55	3.40263
26.5667	3.40523
26.5833	3.40584
26.6	3.42125
26.6167	3.38264
26.6333	3.4095
26.65	3.41805
26.6667	3.4008
26.6833	3.42369
26.7	3.40202
26.7167	3.40401
26.7333	3.39287
26.75	3.39302
26.7667	3.4095
26.7833	3.41362
26.8	3.41042
26.8167	3.40874
26.8333	3.40797
26.85	3.41667
26.8667	3.43056
26.8833	3.43773
26.9	3.43132
26.9167	3.44475
26.9333	3.4565
26.95	3.45573
26.9667	3.47038
26.9833	3.48579
27	3.50472
27.0167	3.5479
27.0333	3.54866
27.05	3.53981
27.0667	3.57979
27.0833	3.61015
27.1	3.64021
27.1167	3.66234
27.1333	3.71696
27.15	3.73573
27.1667	3.76366
27.1833	3.8134
27.2	3.86574
27.2167	3.93013
27.2333	3.96645
27.25	4.04198
27.2667	4.10881
27.2833	4.18114
27.3	4.26735
27.3167	4.34166
27.3333	4.41261
27.35	4.50554
27.3667	4.5916
27.3833	4.66499
27.4	4.76479
27.4167	4.85008
27.4333	4.9334
27.45	5.01976
27.4667	5.10765
27.4833	5.19402
27.5	5.27184
27.5167	5.34203
27.5333	5.41512
27.55	5.4763
27.5667	5.54573
27.5833	5.62386
27.6	5.68016
27.6167	5.74074
27.6333	5.77126
27.65	5.80833
27.6667	5.82344
27.6833	5.85259
27.7	5.87456
27.7167	5.88448
27.7333	5.88753
27.75	5.88921
27.7667	5.8593
27.7833	5.84892
27.8	5.82695
27.8167	5.79674
27.8333	5.77324
27.85	5.71831
27.8667	5.6794
27.8833	5.64629
27.9	5.59868
27.9167	5.5555
27.9333	5.50041
27.95	5.43892
27.9667	5.37987
27.9833	5.31319
28	5.27184
28.0167	5.20119
28.0333	5.14732
28.05	5.10139
28.0667	5.04982
28.0833	4.99916
28.1	4.95338
28.1167	4.90837
28.1333	4.86809
28.15	4.82674
28.1667	4.7715
28.1833	4.7245
28.2	4.66942
28.2167	4.64165
28.2333	4.59587
28.25	4.5591
28.2667	4.53224
28.2833	4.46709
28.3	4.46297
28.3167	4.43672
28.3333	4.39812
28.35	4.36195
28.3667	4.32991
28.3833	4.30641
28.4	4.29115
28.4167	4.2704
28.4333	4.25423
28.45	4.21913
28.4667	4.21486
28.4833	4.18602
28.5	4.16405
28.5167	4.13918
28.5333	4.11781
28.55	4.09554
28.5667	4.07722
28.5833	4.07387
28.6	4.04472
28.6167	4.01649
28.6333	4.01726
28.65	4.01344
28.6667	3.99834
28.6833	3.96675
28.7	3.95119
28.7167	3.94859
28.7333	3.93684
28.75	3.91747
28.7667	3.90907
28.7833	3.91686
28.8	3.90678
28.8167	3.88496
28.8333	3.8784
28.85	3.86757
28.8667	3.87367
28.8833	3.86406
28.9	3.84071
28.9167	3.83415
28.9333	3.85719
28.95	3.84697
28.9667	3.82866
28.9833	3.81065
29	3.79356
29.0167	3.7896
29.0333	3.78761
29.05	3.77327
29.0667	3.76259
29.0833	3.76213
29.1	3.75282
29.1167	3.74321
29.1333	3.74702
29.15	3.72505
29.1667	3.72795
29.1833	3.71346
29.2	3.70384
29.2167	3.68645
29.2333	3.69057
29.25	3.69835
29.2667	3.68431
29.2833	3.67638
29.3	3.68584
29.3167	3.66997
29.3333	3.66554
29.35	3.6721
29.3667	3.68477
29.3833	3.67394
29.4	3.6689
29.4167	3.64922
29.4333	3.64494
29.45	3.66646
29.4667	3.64861
29.4833	3.64311
29.5	3.63716
29.5167	3.62282
29.5333	3.61763
29.55	3.63838
29.5667	3.63121
29.5833	3.62999
29.6	3.62618
29.6167	3.61
29.6333	3.60603
29.65	3.61382
29.6667	3.60512
29.6833	3.601
29.7	3.60039
29.7167	3.59642
29.7333	3.59871
29.75	3.59139
29.7667	3.58467
29.7833	3.58147
29.8	3.58894
29.8167	3.57719
29.8333	3.58299
29.85	3.59612
29.8667	3.58131
29.8833	3.57796
29.9	3.58803
29.9167	3.59276
29.9333	3.59077
29.95	3.57887
29.9667	3.57048
29.9833	3.56117
30	3.55888

## Sheet: MW Results
Administrative Information
File name	ICF_04_12_2024-0002.sample
Analysed by	OBPC
Date of analysis	06 December 2024 14:01:36
Analysis comments
Analysis Module	GPC Analysis
MW Averages
Peaks	Mp (g/mol)	Mn (g/mol)	Mw (g/mol)	Mz (g/mol)	Mz+1 (g/mol)	Mv (g/mol)	PD
Peak 1	176451	46672	275349	987302	2212582	848790	5.89966
Sample Parameters
Injection volume (µL)	200
Concentration options	Undefined
Concentration (mg/mL)	1
dn/dc (mL/g)	0.1
UV extinction coefficient [(mg/mL)-¹][cm-¹]	1
Mark-Houwink K ((10e-5) dL/g)	14.1
Mark-Houwink Alpha	0.7
Concentration Detector Used in Analysis	RI
Baseline regions	Start (mins)	End (mins)
Baseline region 1	7.51667	9.01667
Baseline region 2	17.7333	17.9833
Peaks	Start (mins)	End (mins)
Peak 1	10.4167	16.25
	Trace	Peak Max RT (mins)	Peak Area (mV.s)	Peak Height (mV)
	RI	12.9667	478.184	-3.50309
Flowrate region	Start (mins)	End (mins)
IDD
Reference detector	Undefined
IDD Undefined (secs)	0
Last modified by	OBPC
Last modified date	06 December 2024 14:01:36
Comments
System Calibration
Detector Constants
Entered Parameters For Concentration
Concentration (mg/mL)	0
Injection volume (µL)	0
dn/dc (mL/g)	0
UV extinction coefficient [(mg/mL)-¹][cm-¹]	0
Eluent refractive index	0
Flow rate (mL/min)	0
Comments
Entered Parameters For LS
Mp	0
LS wavelength (nm)	0
Comments
Entered Parameters For Viscometer
Known IV (dL/g)	0
Use Constant Inlet Pressure	No
Comments
System Calibration Information
Created by	OBPC
Creation date	29 October 2024 11:18:00
Last modified by	OBPC
Last modified date	29 October 2024 11:18:00
Information
Sample file used for calibration
Concentration Regions
Baseline regions	Start (mins)	End (mins)
Peaks	Start (mins)	End (mins)
Flowrate region	Start (mins)	End (mins)
LS Regions
Baseline regions	Start (mins)	End (mins)
Peaks	Start (mins)	End (mins)
Flowrate region	Start (mins)	End (mins)
VS Regions
Baseline regions	Start (mins)	End (mins)
Peaks	Start (mins)	End (mins)
Flowrate region	Start (mins)	End (mins)
System Calibration Peak Information
Channel	Peak Max RT (mins)	Peak Height (mV)	Peak Area (mV.s)
Flowrate Information
FRM Name
FRM RT (mins)	0
FRCF	1
Column Calibration
Name	2024-10-29-001
Created By	OBPC
Creation Date	29/10/2024 16:43:21
Last Modified By	OBPC
Last Modified	29/10/2024 16:46:00
High Limit RT (mins)	10.3167
Low Limit RT (mins)	17.05
High Limit MW	6542896
Low Limit MW	585
K (Input) ((10e-5) dL/g)	14.1
Alpha (Input)	0.7
Calibration Flow Marker Name
Calibration Flow Marker RT (mins)	0
Calibration Comments	GPC Column Calibration created 29 October 2024 by OBPC GPC Column Calibration amended 29 October 2024 by OBPC GPC Column Calibration amended 29 October 2024 by OBPC
Calibration Type	GPC Narrow Standard
Curve Fit Type	Polynomial
Order Of Curve Fit	5
Number Of Points	11
Curve Fit Equation	y = - 0.0006266x^5 + 0.04142x^4 - 1.085x^3 + 14.06x^2 - 90.8x + 242.2
Coeff a	242.186
Coeff b	-90.7983
Coeff c	14.0588
Coeff d	-1.08465
Coeff e	0.0414232
Coeff f	-0.000626569
Residual Sum Of Squares	0.000581819
Corrected Sum Of Squares	18.6999
Coefficient Of Determination	0.999969
Standard Y Error Estimate	0.0107872
Linear Correlation Coefficient	-0.999868

## Sheet: Slice Table
Slice Table
RT (mins)	RI	Norm Ht	Cum Ht	Mw (g/mol)	logM	dwdlogM	Outside Calib	Peak
10.4167	-0.0707947	0.000148026	0.999929	5707795	6.75647	0.0145549	No	1
10.4333	-0.0655368	0.000137033	0.999788	5580692	6.74669	0.014123	No	1
10.45	-0.0663824	0.000138801	0.999651	5456753	6.73693	0.0140967	No	1
10.4667	-0.0649392	0.000135783	0.999509	5335880	6.72721	0.0149883	No	1
10.4833	-0.0743298	0.000155418	0.999367	5217980	6.7175	0.0143519	No	1
10.5	-0.0586959	0.000122729	0.999235	5102961	6.70782	0.0130178	No	1
10.5167	-0.0616777	0.000128964	0.999109	4990736	6.69816	0.0129496	No	1
10.5333	-0.0577931	0.000120841	0.998989	4881221	6.68853	0.012018	No	1
10.55	-0.0528404	0.000110485	0.998882	4774335	6.67891	0.0101177	No	1
10.5667	-0.0401057	8.3858e-05	0.998793	4670001	6.66932	0.00845835	No	1
10.5833	-0.0374418	7.8288e-05	0.998709	4568143	6.65974	0.00920954	No	1
10.6	-0.0468323	9.79229e-05	0.998611	4468690	6.65018	0.0112155	No	1
10.6167	-0.0556125	0.000116282	0.998502	4371571	6.64064	0.0116378	No	1
10.6333	-0.0505072	0.000105607	0.998391	4276720	6.63111	0.0117085	No	1
10.65	-0.0560831	0.000117265	0.998278	4184073	6.6216	0.0120301	No	1
10.6667	-0.0532666	0.000111376	0.99817	4093567	6.6121	0.0107209	No	1
10.6833	-0.0440414	9.20872e-05	0.998062	4005142	6.60262	0.0119827	No	1
10.7	-0.0645708	0.000135013	0.997933	3918740	6.59315	0.015337	No	1
10.7167	-0.0742666	0.000155286	0.997784	3834305	6.58369	0.0161162	No	1
10.7333	-0.0714501	0.000149397	0.997627	3751785	6.57424	0.0170817	No	1
10.75	-0.0828243	0.000173179	0.997465	3671126	6.5648	0.0173714	No	1
10.7667	-0.0739042	0.000154528	0.997307	3592279	6.55537	0.0161536	No	1
10.7833	-0.0716981	0.000149915	0.997153	3515195	6.54595	0.0164403	No	1
10.8	-0.0763584	0.00015966	0.996988	3439827	6.53654	0.0185405	No	1
10.8167	-0.0904792	0.000189185	0.996797	3366131	6.52713	0.022068	No	1
10.8333	-0.107957	0.00022573	0.996573	3294063	6.51773	0.0256156	No	1
10.85	-0.12223	0.000255574	0.996325	3223580	6.50834	0.0272457	No	1
10.8667	-0.122466	0.000256066	0.99607	3154641	6.49895	0.0270738	No	1
10.8833	-0.120565	0.000252091	0.995818	3087208	6.48957	0.0267467	No	1
10.9	-0.119427	0.000249712	0.995554	3021243	6.48019	0.0294797	No	1
10.9167	-0.144991	0.000303166	0.995261	2956707	6.47081	0.0329612	No	1
10.9333	-0.150567	0.000314825	0.99495	2893567	6.46143	0.0333105	No	1
10.95	-0.148056	0.000309574	0.99463	2831786	6.45206	0.0349856	No	1
10.9667	-0.165534	0.000346118	0.994295	2771333	6.44269	0.0366759	No	1
10.9833	-0.163175	0.000341186	0.993951	2712173	6.43332	0.0366445	No	1
11	-0.165241	0.000345507	0.993607	2654277	6.42395	0.036713	No	1
11.0167	-0.163798	0.000342489	0.993264	2597613	6.41457	0.036524	No	1
11.0333	-0.163575	0.000342024	0.992914	2542153	6.4052	0.0382392	No	1
11.05	-0.179222	0.00037474	0.99254	2487868	6.39583	0.0415684	No	1
11.0667	-0.193495	0.000404584	0.992129	2434729	6.38645	0.0459996	No	1
11.0833	-0.21906	0.000458039	0.991675	2382711	6.37707	0.050766	No	1
11.1	-0.236385	0.000494264	0.991196	2331787	6.36769	0.0514289	No	1
11.1167	-0.225177	0.000470827	0.990728	2281933	6.3583	0.0482309	No	1
11.1333	-0.207864	0.000434628	0.99027	2233122	6.34891	0.0493649	No	1
11.15	-0.235565	0.000492549	0.989789	2185333	6.33952	0.0529912	No	1
11.1667	-0.240683	0.000503251	0.989286	2138541	6.33012	0.0541166	No	1
11.1833	-0.245954	0.000514271	0.988764	2092725	6.32071	0.0569171	No	1
11.2	-0.266178	0.000556559	0.988211	2047862	6.3113	0.0605758	No	1
11.2167	-0.279231	0.000583851	0.987639	2003932	6.30188	0.0609076	No	1
11.2333	-0.269548	0.000563605	0.987062	1960914	6.29246	0.0613547	No	1
11.25	-0.283669	0.00059313	0.986465	1918787	6.28303	0.0653666	No	1
11.2667	-0.306182	0.000640203	0.985833	1877533	6.27359	0.0685585	No	1
11.2833	-0.312979	0.000654414	0.985167	1837132	6.26414	0.0724007	No	1
11.3	-0.341443	0.00071393	0.984462	1797566	6.25468	0.0766383	No	1
11.3167	-0.351901	0.000735799	0.983733	1758818	6.24522	0.0775795	No	1
11.3333	-0.350611	0.0007331	0.982986	1720869	6.23575	0.0800481	No	1
11.35	-0.374955	0.000784002	0.9822	1683703	6.22627	0.0856372	No	1
11.3667	-0.402045	0.000840647	0.981368	1647303	6.21677	0.089717	No	1
11.3833	-0.412809	0.000863153	0.9805	1611653	6.20727	0.0929463	No	1
11.4	-0.432271	0.000903845	0.979594	1576738	6.19776	0.0976579	No	1
11.4167	-0.456615	0.000954747	0.978644	1542542	6.18824	0.101837	No	1
11.4333	-0.471346	0.000985549	0.977655	1509050	6.1787	0.10567	No	1
11.45	-0.492638	0.00103007	0.976633	1476247	6.16916	0.108438	No	1
11.4667	-0.497756	0.00104077	0.975583	1444121	6.1596	0.111363	No	1
11.4833	-0.520575	0.00108848	0.974494	1412655	6.15004	0.116329	No	1
11.5	-0.544461	0.00113843	0.973348	1381838	6.14046	0.122812	No	1
11.5167	-0.581317	0.00121549	0.972139	1351656	6.13087	0.129258	No	1
11.5333	-0.605051	0.00126512	0.970871	1322097	6.12126	0.134989	No	1
11.55	-0.635499	0.00132878	0.969554	1293146	6.11165	0.13891	No	1
11.5667	-0.642753	0.00134395	0.968201	1264793	6.10202	0.142074	No	1
11.5833	-0.666334	0.00139325	0.966802	1237025	6.09238	0.148171	No	1
11.6	-0.700749	0.00146521	0.965338	1209831	6.08272	0.155008	No	1
11.6167	-0.73135	0.0015292	0.963811	1183199	6.07306	0.161049	No	1
11.6333	-0.758593	0.00158616	0.962214	1157118	6.06338	0.1688	No	1
11.65	-0.805215	0.00168364	0.960537	1131576	6.05368	0.177219	No	1
11.6667	-0.838867	0.00175401	0.958799	1106564	6.04398	0.180963	No	1
11.6833	-0.842307	0.0017612	0.957025	1082071	6.03426	0.183891	No	1
11.7	-0.868482	0.00181593	0.955207	1058087	6.02452	0.189691	No	1
11.7167	-0.898777	0.00187927	0.953319	1034600	6.01477	0.19768	No	1
11.7333	-0.945551	0.00197708	0.951347	1011603	6.00501	0.206347	No	1
11.75	-0.982408	0.00205414	0.949304	989085	5.99523	0.211431	No	1
11.7667	-0.995918	0.00208239	0.947212	967036	5.98544	0.215946	No	1
11.7833	-1.02759	0.00214861	0.945056	945448	5.97564	0.223828	No	1
11.8	-1.07284	0.00224322	0.942814	924311	5.96582	0.232774	No	1
11.8167	-1.11473	0.00233081	0.940492	903617	5.95598	0.239601	No	1
11.8333	-1.14029	0.00238426	0.938094	883357	5.94614	0.247411	No	1
11.85	-1.19164	0.00249164	0.935614	863523	5.93627	0.255374	No	1
11.8667	-1.21889	0.0025486	0.933066	844105	5.9264	0.260602	No	1
11.8833	-1.2446	0.00260237	0.930467	825097	5.91651	0.264799	No	1
11.9	-1.26224	0.00263924	0.927813	806490	5.9066	0.271187	No	1
11.9167	-1.30886	0.00273672	0.925075	788276	5.89668	0.280659	No	1
11.9333	-1.35594	0.00283516	0.92225	770447	5.88674	0.288097	No	1
11.95	-1.38349	0.00289276	0.919357	752997	5.87679	0.293398	No	1
11.9667	-1.41042	0.00294909	0.916393	735917	5.86683	0.301517	No	1
11.9833	-1.46498	0.00306316	0.913332	719201	5.85685	0.311865	No	1
12	-1.51343	0.00316447	0.910172	702841	5.84686	0.320717	No	1
12.0167	-1.55395	0.0032492	0.906923	686830	5.83685	0.328604	No	1
12.0333	-1.5934	0.00333168	0.903595	671161	5.82683	0.335341	No	1
12.05	-1.62309	0.00339375	0.900193	655829	5.81679	0.342648	No	1
12.0667	-1.66818	0.00348804	0.896702	640825	5.80674	0.352094	No	1
12.0833	-1.71862	0.0035935	0.893113	626145	5.79667	0.361104	No	1
12.1	-1.75975	0.0036795	0.889432	611781	5.7866	0.369126	No	1
12.1167	-1.80088	0.0037655	0.885667	597726	5.7765	0.376971	No	1
12.1333	-1.84048	0.0038483	0.881817	583976	5.76639	0.384891	No	1
12.15	-1.88252	0.00393622	0.877887	570524	5.75627	0.391786	No	1
12.1667	-1.91236	0.0039986	0.873889	557364	5.74614	0.397013	No	1
12.1833	-1.93838	0.00405301	0.869821	544491	5.73599	0.404776	No	1
12.2	-1.99294	0.00416709	0.865656	531898	5.72583	0.414954	No	1
12.2167	-2.04261	0.00427095	0.861388	519580	5.71565	0.423825	No	1
12.2333	-2.08466	0.00435886	0.857035	507532	5.70546	0.430597	No	1
12.25	-2.11404	0.00442029	0.852606	495748	5.69526	0.437607	No	1
12.2667	-2.15852	0.00451331	0.848075	484223	5.68505	0.449614	No	1
12.2833	-2.23688	0.00467716	0.843421	472952	5.67482	0.460335	No	1
12.3	-2.26901	0.00474433	0.838674	461930	5.66458	0.466645	No	1
12.3167	-2.30434	0.0048182	0.833851	451151	5.65432	0.474035	No	1
12.3333	-2.34715	0.00490771	0.828952	440611	5.64406	0.480435	No	1
12.35	-2.37287	0.00496148	0.823979	430305	5.63378	0.487154	No	1
12.3667	-2.41888	0.00505769	0.818918	420229	5.62349	0.496297	No	1
12.3833	-2.46855	0.00516155	0.813758	410377	5.61318	0.505334	No	1
12.4	-2.51365	0.00525585	0.808503	400745	5.60287	0.513725	No	1
12.4167	-2.55707	0.00534663	0.803154	391328	5.59254	0.52226	No	1
12.4333	-2.60369	0.00544411	0.797704	382123	5.5822	0.531943	No	1
12.45	-2.65855	0.00555882	0.792155	373124	5.57185	0.540367	No	1
12.4667	-2.69281	0.00563046	0.786519	364328	5.56149	0.547597	No	1
12.4833	-2.73592	0.00572061	0.780789	355731	5.55112	0.557498	No	1
12.5	-2.79674	0.00584776	0.774958	347328	5.54074	0.565746	No	1
12.5167	-2.82352	0.00590377	0.769048	339115	5.53035	0.571534	No	1
12.5333	-2.85992	0.00597988	0.763063	331088	5.51994	0.579161	No	1
12.55	-2.90502	0.00607417	0.756995	323244	5.50953	0.586341	No	1
12.5667	-2.93699	0.00614102	0.750852	315579	5.49911	0.592297	No	1
12.5833	-2.96988	0.00620979	0.74463	308088	5.48867	0.600439	No	1
12.6	-3.02367	0.00632227	0.738316	300769	5.47823	0.609054	No	1
12.6167	-3.06129	0.00640093	0.731908	293617	5.46778	0.617133	No	1
12.6333	-3.10975	0.00650224	0.725417	286630	5.45732	0.623901	No	1
12.65	-3.13424	0.00655346	0.71886	279803	5.44685	0.628859	No	1
12.6667	-3.16454	0.00661681	0.712244	273134	5.43638	0.633976	No	1
12.6833	-3.19056	0.00667122	0.705574	266618	5.42589	0.638217	No	1
12.7	-3.212	0.00671606	0.698856	260253	5.4154	0.642254	No	1
12.7167	-3.23589	0.006766	0.692083	254036	5.4049	0.647592	No	1
12.7333	-3.27031	0.00683796	0.685252	247963	5.39439	0.652527	No	1
12.75	-3.29007	0.00687929	0.678363	242030	5.38387	0.657609	No	1
12.7667	-3.32586	0.00695412	0.671418	236237	5.37335	0.662503	No	1
12.7833	-3.34364	0.00699131	0.664427	230578	5.36282	0.665317	No	1
12.8	-3.35837	0.00702211	0.657396	225051	5.35228	0.669385	No	1
12.8167	-3.38867	0.00708545	0.650316	219654	5.34174	0.673739	No	1
12.8333	-3.40615	0.007122	0.643201	214383	5.33119	0.675201	No	1
12.85	-3.40715	0.00712408	0.636069	209236	5.32064	0.676452	No	1
12.8667	-3.42233	0.00715584	0.628909	204210	5.31008	0.679563	No	1
12.8833	-3.44195	0.00719685	0.621724	199303	5.29951	0.68068	No	1
12.9	-3.43684	0.00718618	0.61453	194511	5.28894	0.680622	No	1
12.9167	-3.4444	0.00720199	0.607319	189832	5.27837	0.683449	No	1
12.9333	-3.46829	0.00725193	0.600072	185264	5.26779	0.686804	No	1
12.95	-3.48104	0.00727858	0.592787	180805	5.25721	0.689994	No	1
12.9667	-3.50309	0.0073247	0.585475	176451	5.24662	0.691438	No	1
12.9833	-3.49799	0.00731403	0.578157	172201	5.23604	0.690865	No	1
13	-3.49944	0.00731707	0.57084	168052	5.22544	0.690643	No	1
13.0167	-3.49769	0.00731341	0.563527	164002	5.21485	0.689914	No	1
13.0333	-3.49381	0.00730529	0.556216	160048	5.20425	0.689745	No	1
13.05	-3.49755	0.00731312	0.548905	156189	5.19365	0.689806	No	1
13.0667	-3.49581	0.00730947	0.541599	152423	5.18305	0.688502	No	1
13.0833	-3.48551	0.00728794	0.534301	148746	5.17245	0.68806	No	1
13.1	-3.49231	0.00730215	0.527008	145158	5.16184	0.687442	No	1
13.1167	-3.48003	0.00727648	0.519732	141656	5.15123	0.684602	No	1
13.1333	-3.46409	0.00724316	0.51248	138239	5.14063	0.682879	No	1
13.15	-3.46296	0.00724078	0.505238	134903	5.13002	0.682635	No	1
13.1667	-3.46182	0.0072384	0.498011	131649	5.11942	0.680108	No	1
13.1833	-3.43733	0.0071872	0.490816	128472	5.10881	0.676503	No	1
13.2	-3.42506	0.00716153	0.483654	125373	5.0982	0.674059	No	1
13.2167	-3.41217	0.00713459	0.476527	122348	5.0876	0.669874	No	1
13.2333	-3.38204	0.00707159	0.469446	119397	5.07699	0.665572	No	1
13.25	-3.36778	0.00704177	0.462409	116517	5.06639	0.661784	No	1
13.2667	-3.34268	0.0069893	0.455415	113707	5.05579	0.657577	No	1
13.2833	-3.324	0.00695023	0.448465	110965	5.04519	0.653853	No	1
13.3	-3.30363	0.00690765	0.441557	108290	5.03459	0.649845	No	1
13.3167	-3.2819	0.0068622	0.434694	105681	5.024	0.645628	No	1
13.3333	-3.25924	0.00681483	0.427866	103134	5.0134	0.643717	No	1
13.35	-3.2607	0.00681788	0.421061	100650	5.00281	0.641491	No	1
13.3667	-3.23469	0.00676349	0.414305	98226	4.99223	0.634894	No	1
13.3833	-3.19174	0.00667369	0.407622	95862	4.98165	0.628205	No	1
13.4	-3.16467	0.00661708	0.401001	93555	4.97107	0.623702	No	1
13.4167	-3.14369	0.00657322	0.394432	91305	4.96049	0.618879	No	1
13.4333	-3.11326	0.00650958	0.387912	89110	4.94993	0.61481	No	1
13.45	-3.09976	0.00648136	0.381435	86968	4.93936	0.611403	No	1
13.4667	-3.07588	0.00643144	0.375006	84879	4.9288	0.606407	No	1
13.4833	-3.04621	0.0063694	0.368627	82842	4.91825	0.602542	No	1
13.5	-3.03363	0.00634309	0.362294	80854	4.9077	0.598175	No	1
13.5167	-2.99877	0.0062702	0.356012	78915	4.89716	0.593713	No	1
13.5333	-2.98512	0.00624166	0.349778	77024	4.88663	0.589777	No	1
13.55	-2.95545	0.00617962	0.343595	75179	4.8761	0.584639	No	1
13.5667	-2.92959	0.00612555	0.337461	73379	4.86557	0.581406	No	1
13.5833	-2.91899	0.00610339	0.331365	71624	4.85506	0.577986	No	1
13.6	-2.89115	0.00604518	0.325313	69912	4.84455	0.574136	No	1
13.6167	-2.87613	0.00601377	0.319309	68242	4.83405	0.56943	No	1
13.6333	-2.83959	0.00593737	0.313372	66613	4.82356	0.562266	No	1
13.65	-2.79985	0.00585427	0.3075	65025	4.81308	0.55815	No	1
13.6667	-2.79383	0.00584168	0.301669	63475	4.8026	0.555185	No	1
13.6833	-2.76553	0.00578251	0.295886	61964	4.79214	0.54988	No	1
13.7	-2.73601	0.00572079	0.290162	60489	4.78168	0.544946	No	1
13.7167	-2.71137	0.00566927	0.284496	59052	4.77123	0.539605	No	1
13.7333	-2.67773	0.00559894	0.278903	57649	4.76079	0.53211	No	1
13.75	-2.63158	0.00550244	0.273394	56282	4.75037	0.524385	No	1
13.7667	-2.59565	0.00542731	0.267956	54948	4.73995	0.519599	No	1
13.7833	-2.5788	0.00539207	0.262571	53646	4.72954	0.515215	No	1
13.8	-2.54684	0.00532524	0.257244	52377	4.71914	0.50959	No	1
13.8167	-2.51762	0.00526416	0.251993	51140	4.70876	0.501445	No	1
13.8333	-2.46064	0.00514501	0.246831	49932	4.69838	0.493771	No	1
13.85	-2.43615	0.00509381	0.241741	48755	4.68802	0.488325	No	1
13.8667	-2.40129	0.00502092	0.236727	47606	4.67766	0.480472	No	1
13.8833	-2.35301	0.00491996	0.231804	46486	4.66732	0.471732	No	1
13.9	-2.30945	0.00482888	0.226966	45394	4.657	0.465021	No	1
13.9167	-2.2813	0.00477003	0.222201	44328	4.64668	0.458769	No	1
13.9333	-2.24232	0.00468853	0.217507	43289	4.63638	0.452218	No	1
13.95	-2.21128	0.00462361	0.212881	42275	4.62608	0.446884	No	1
13.9667	-2.18435	0.00456732	0.20831	41286	4.6158	0.442556	No	1
13.9833	-2.16323	0.00452314	0.203796	40322	4.60554	0.43678	No	1
14	-2.12211	0.00443717	0.199352	39381	4.59529	0.430327	No	1
14.0167	-2.09442	0.00437928	0.194975	38464	4.58505	0.424583	No	1
14.0333	-2.06032	0.00430798	0.190668	37569	4.57483	0.41791	No	1
14.05	-2.02363	0.00423126	0.186436	36696	4.56462	0.410851	No	1
14.0667	-1.98587	0.00415231	0.182283	35844	4.55442	0.40378	No	1
14.0833	-1.94918	0.00407559	0.178204	35013	4.54423	0.397402	No	1
14.1	-1.91829	0.004011	0.174195	34203	4.53406	0.39095	No	1
14.1167	-1.88099	0.00393301	0.17026	33413	4.52392	0.38414	No	1
14.1333	-1.84674	0.00386139	0.166397	32642	4.51378	0.377867	No	1
14.15	-1.81478	0.00379456	0.162609	31889	4.50364	0.370367	No	1
14.1667	-1.76878	0.00369838	0.158898	31156	4.49354	0.363766	No	1
14.1833	-1.74567	0.00365006	0.155251	30440	4.48344	0.358891	No	1
14.2	-1.71645	0.00358898	0.151664	29742	4.47337	0.352786	No	1
14.2167	-1.68159	0.00351609	0.148141	29060	4.4633	0.347365	No	1
14.2333	-1.65909	0.00346904	0.144673	28396	4.45326	0.343012	No	1
14.25	-1.63461	0.00341785	0.141269	27747	4.44322	0.335531	No	1
14.2667	-1.5822	0.00330827	0.13795	27115	4.43321	0.327104	No	1
14.2833	-1.54887	0.00323857	0.134702	26497	4.4232	0.322423	No	1
14.3	-1.53247	0.00320428	0.131511	25895	4.41322	0.316819	No	1
14.3167	-1.49044	0.0031164	0.128388	25307	4.40324	0.309645	No	1
14.3333	-1.45924	0.00305117	0.125337	24734	4.39329	0.303462	No	1
14.35	-1.42682	0.00298338	0.122345	24175	4.38337	0.298885	No	1
14.3667	-1.41104	0.00295037	0.119402	23629	4.37345	0.294375	No	1
14.3833	-1.37938	0.00288418	0.116521	23096	4.36354	0.287417	No	1
14.4	-1.34055	0.002803	0.113706	22576	4.35365	0.282069	No	1
14.4167	-1.32431	0.00276903	0.110941	22069	4.34378	0.27821	No	1
14.4333	-1.29967	0.00271752	0.108233	21574	4.33393	0.271519	No	1
14.45	-1.25688	0.00262804	0.105598	21091	4.3241	0.264125	No	1
14.4667	-1.22583	0.00256313	0.103041	20619	4.31427	0.256707	No	1
14.4833	-1.18304	0.00247365	0.100554	20159	4.30447	0.250648	No	1
14.5	-1.16496	0.00243585	0.0981237	19710	4.29469	0.245924	No	1
14.5167	-1.13483	0.00237285	0.0957385	19271	4.2849	0.242344	No	1
14.5333	-1.12759	0.00235771	0.0933987	18843	4.27515	0.237459	No	1
14.55	-1.08541	0.00226951	0.0911188	18425	4.26541	0.230867	No	1
14.5667	-1.06245	0.0022215	0.0888902	18018	4.25571	0.227719	No	1
14.5833	-1.05246	0.00220062	0.0867012	17620	4.24601	0.223474	No	1
14.6	-1.01943	0.00213156	0.0845542	17231	4.23631	0.219856	No	1
14.6167	-1.0154	0.00212312	0.0824381	16852	4.22665	0.217844	No	1
14.6333	-0.997321	0.00208532	0.0803598	16481	4.21698	0.212779	No	1
14.65	-0.965208	0.00201818	0.0783335	16120	4.20737	0.207796	No	1
14.6667	-0.948048	0.0019823	0.0763541	15766	4.19772	0.20374	No	1
14.6833	-0.924632	0.00193334	0.0744141	15422	4.18814	0.200334	No	1
14.7	-0.913576	0.00191022	0.0725092	15085	4.17855	0.197081	No	1
14.7167	-0.891686	0.00186445	0.0706477	14756	4.16897	0.191947	No	1
14.7333	-0.86354	0.0018056	0.0688349	14435	4.15942	0.187562	No	1
14.75	-0.848669	0.0017745	0.0670586	14122	4.1499	0.184935	No	1
14.7667	-0.836697	0.00174947	0.065312	13815	4.14035	0.181962	No	1
14.7833	-0.818775	0.001712	0.0635989	13516	4.13085	0.178489	No	1
14.8	-0.802378	0.00167771	0.0619239	13224	4.12136	0.174548	No	1
14.8167	-0.780335	0.00163162	0.0602889	12939	4.1119	0.170625	No	1
14.8333	-0.764244	0.00159798	0.0586915	12660	4.10243	0.167176	No	1
14.85	-0.746626	0.00156114	0.0571322	12388	4.093	0.163104	No	1
14.8667	-0.725041	0.00151601	0.0556032	12122	4.08357	0.161286	No	1
14.8833	-0.727871	0.00152192	0.0540924	11862	4.07416	0.159765	No	1
14.9	-0.709032	0.00148253	0.0526099	11608	4.06476	0.155771	No	1
14.9167	-0.689736	0.00144219	0.0511623	11360	4.05538	0.152817	No	1
14.9333	-0.680359	0.00142258	0.0497377	11118	4.04603	0.151334	No	1
14.95	-0.674338	0.00140999	0.0483396	10881	4.03667	0.14764	No	1
14.9667	-0.645276	0.00134922	0.0469729	10649	4.02731	0.145043	No	1
14.9833	-0.649174	0.00135737	0.0456244	10423	4.01799	0.144181	No	1
15	-0.635676	0.00132915	0.0443009	10202	4.00869	0.140106	No	1
15.0167	-0.611039	0.00127764	0.0430207	9986	3.99939	0.135277	No	1
15.0333	-0.59098	0.0012357	0.0417724	9775	3.99012	0.133612	No	1
15.05	-0.594573	0.00124321	0.0405496	9568	3.98082	0.130165	No	1
15.0667	-0.558797	0.0011684	0.0393669	9366	3.97155	0.125308	No	1
15.0833	-0.55003	0.00115007	0.038216	9169	3.96232	0.123627	No	1
15.1	-0.542483	0.00113429	0.0370784	8976	3.95308	0.122751	No	1
15.1167	-0.540887	0.00113095	0.0359583	8788	3.94389	0.120155	No	1
15.1333	-0.518234	0.00108359	0.0348696	8603	3.93465	0.116231	No	1
15.15	-0.505042	0.001056	0.0338088	8423	3.92547	0.114375	No	1
15.1667	-0.5007	0.00104692	0.0327592	8246	3.91624	0.114057	No	1
15.1833	-0.501087	0.00104774	0.0317186	8074	3.90709	0.11269	No	1
15.2	-0.48759	0.00101951	0.030698	7905	3.8979	0.109941	No	1
15.2167	-0.475923	0.000995119	0.0297057	7740	3.88874	0.106727	No	1
15.2333	-0.458458	0.000958601	0.0287484	7579	3.87961	0.102526	No	1
15.25	-0.438247	0.000916341	0.0278142	7421	3.87046	0.101891	No	1
15.2667	-0.452062	0.000945228	0.0268763	7267	3.86136	0.103506	No	1
15.2833	-0.451535	0.000944125	0.0259342	7116	3.85224	0.103002	No	1
15.3	-0.446887	0.000934407	0.0250066	6968	3.84311	0.100478	No	1
15.3167	-0.428812	0.000896613	0.0241089	6823	3.83398	0.0966142	No	1
15.3333	-0.412568	0.000862647	0.0232388	6682	3.82491	0.094563	No	1
15.35	-0.410361	0.000858035	0.0223852	6543	3.81578	0.0931182	No	1
15.3667	-0.399458	0.000835236	0.0215471	6408	3.80672	0.0912627	No	1
15.3833	-0.393742	0.000823285	0.0207373	6275	3.79761	0.0869935	No	1
15.4	-0.361934	0.000756776	0.0199623	6145	3.78852	0.083699	No	1
15.4167	-0.364763	0.000762692	0.0192149	6018	3.77945	0.0809944	No	1
15.4333	-0.338143	0.000707031	0.0185035	5894	3.77041	0.0758379	No	1
15.45	-0.319762	0.000668599	0.0178225	5772	3.76133	0.0743329	No	1
15.4667	-0.324881	0.000679301	0.017163	5653	3.75228	0.0711505	No	1
15.4833	-0.292004	0.000610559	0.0165376	5536	3.7432	0.0668179	No	1
15.5	-0.287204	0.000600522	0.0159399	5422	3.73416	0.065085	No	1
15.5167	-0.276911	0.000579	0.015355	5310	3.72509	0.0639814	No	1
15.5333	-0.277604	0.000580449	0.0147697	5200	3.716	0.0651972	No	1
15.55	-0.287452	0.000601041	0.0141829	5093	3.70697	0.0643135	No	1
15.5667	-0.269987	0.000564523	0.0136144	4987	3.69784	0.0611372	No	1
15.5833	-0.259999	0.000543638	0.0130636	4884	3.68878	0.0603686	No	1
15.6	-0.263439	0.00055083	0.0125101	4783	3.6797	0.0617246	No	1
15.6167	-0.271914	0.000568551	0.0119529	4685	3.67071	0.0611229	No	1
15.6333	-0.258416	0.000540328	0.0114131	4588	3.66162	0.0578627	No	1
15.65	-0.24385	0.000509873	0.0109021	4493	3.65254	0.0547065	No	1
15.6667	-0.231268	0.000483564	0.010414	4400	3.64345	0.0527611	No	1
15.6833	-0.227231	0.000475123	0.00994044	4309	3.63438	0.051428	No	1
15.7	-0.219989	0.000459981	0.00947784	4219	3.62521	0.0502854	No	1
15.7167	-0.217631	0.000455049	0.00902583	4132	3.61616	0.0490178	No	1
15.7333	-0.209321	0.000437675	0.00859168	4046	3.60703	0.046278	No	1
15.75	-0.194145	0.000405942	0.00817434	3962	3.59791	0.0452356	No	1
15.7667	-0.200636	0.000419515	0.00775955	3880	3.58883	0.0456234	No	1
15.7833	-0.197972	0.000413945	0.00735272	3799	3.57967	0.0433897	No	1
15.8	-0.181576	0.000379661	0.00696128	3719	3.57043	0.0421505	No	1
15.8167	-0.187609	0.000392277	0.00657301	3642	3.56134	0.0425809	No	1
15.8333	-0.185861	0.000388621	0.00618967	3566	3.55218	0.0409561	No	1
15.85	-0.173889	0.000363589	0.00581733	3491	3.54295	0.0400608	No	1
15.8667	-0.178549	0.000373333	0.00545846	3418	3.53377	0.0379004	No	1
15.8833	-0.155439	0.000325011	0.00512143	3346	3.52453	0.0351905	No	1
15.9	-0.155216	0.000324545	0.00480218	3276	3.51534	0.0339188	No	1
15.9167	-0.14477	0.000302704	0.00449409	3206	3.50596	0.0326486	No	1
15.9333	-0.144548	0.000302239	0.0041926	3139	3.49679	0.0323595	No	1
15.95	-0.142799	0.000298583	0.00388408	3072	3.48742	0.0340229	No	1
15.9667	-0.159972	0.000334489	0.00356821	3007	3.47813	0.0337934	No	1
15.9833	-0.141439	0.000295738	0.00326652	2943	3.46879	0.0308306	No	1
16	-0.134197	0.000280597	0.00298564	2880	3.45939	0.0291897	No	1
16.0167	-0.127414	0.000266412	0.00271592	2819	3.4501	0.0283009	No	1
16.0333	-0.126886	0.000265309	0.00245567	2758	3.44059	0.0270241	No	1
16.05	-0.116593	0.000243786	0.00220937	2699	3.4312	0.0251939	No	1
16.0667	-0.11103	0.000232154	0.00198684	2641	3.42177	0.0218555	No	1
16.0833	-0.0870034	0.000181917	0.00179356	2584	3.41229	0.0188868	No	1
16.1	-0.0846446	0.000176986	0.00161392	2528	3.40278	0.0188629	No	1
16.1167	-0.0873213	0.000182582	0.00142596	2473	3.39322	0.0205054	No	1
16.1333	-0.100221	0.000209555	0.00123034	2419	3.38364	0.0203388	No	1
16.15	-0.0864185	0.000180695	0.00104539	2366	3.37401	0.0181492	No	1
16.1667	-0.0807029	0.000168744	0.000866565	2314	3.36436	0.0189282	No	1
16.1833	-0.0942133	0.000196993	0.000673051	2263	3.35468	0.0210484	No	1
16.2	-0.10101	0.000211204	0.000466442	2213	3.34498	0.0214784	No	1
16.2167	-0.0989563	0.00020691	0.000265483	2164	3.33526	0.0197311	No	1
16.2333	-0.0854586	0.000178688	8.45345e-05	2116	3.32552	0.0172307	No	1
