# Supplementary material for: Descriptive study and evaluation of shrink hoods with recycled content for regulatory compliance
Source: Research Square preprint supplement (doi:10.21203/rs.3.rs-6261320/v1), 2025-06-25
Supplement: Supplementary file 6 [file b2678ea6dc5c01d984a891d3.xlsx]

## Sheet: Sample Details
Administrative Information
Export date	10 December 2024 09:41:59
Culture name	en-GB
Decimal separator	.
Workspace name	November 2024
Workspace path	C:\ProgramData\Agilent Technologies\GPC\Workspaces\2024\November 2024\
File name	ICF_04_12_2024-0001.sample
Creation date	05 December 2024 08:54:50
Created by	OBPC
Comments	Collected by Agilent GPC/SEC Software Version 2.1.9.34851
Software version	Agilent SEC Software - 2.1.9.34851
Sample Information
Sample name	A
Information
Sample type	Sample
Injection date	05 December 2024
Vial number	None
Injection number	1
Injection volume (µL)	200
Concentration (mg/mL)	1
dn/dc (mL/g)	0.1
UV extinction coefficient [(mg/mL)-¹][cm-¹]	1
Mp (g/mol)	100000
IV (dL/g)	0.5
Mark-Houwink K ((10e-5) dL/g)	14.1
Mark-Houwink Alpha	0.7
Analysed	Yes
Sample Instrument Conditions
Eluent
Eluent refractive index	1
Set flow rate (mL/min)	1
LS wavelength (nm)	650
Laser power (%)	0
Set detector temperature (°C)	0
Actual detector temperature (°C)	0
Actual flow rate (mL/min)	0
Column information
Data origin	Collected by Agilent GPC/SEC Software Version 2.1.9.34851
Instrument name	Agilent DataStream
Sample Collection Parameters
Collected by	OBPC
Number of channels	1
Run length (mins)	30.0167
Delay time (secs)	0
Sampling interval (secs)	1
Number of data points	1801
Sample DLS Parameters
Eluent refractive index	1
Eluent viscosity (P)	0.0089
DLS correlator run time (secs)	5
DLS Clip Time (µs)	100
DLS R²	0.4
Sample Channel Information
Channel ID	Detector type	Detector name	Detector units	Channel Information
1	RI	Trace0	mV

## Sheet: Raw Data
Sample Collection Parameters
Collected by	OBPC
Number of channels	1
Run length (mins)	30.0167
Delay time (secs)	0
Sampling interval (secs)	1
Number of data points	1801
Sample DLS Parameters
Eluent refractive index	1
Eluent viscosity (P)	0.0089
DLS correlator run time (secs)	5
DLS Clip Time (µs)	100
DLS R²	0.4
Sample Channel Information
Channel ID	Detector type	Detector name	Detector units	Channel Information
1	RI	Trace0	mV
Raw Data
RT (mins)	Response Trace 1
0	3.53238
0.0166667	3.51173
0.0333333	3.48869
0.05	3.48335
0.0666667	3.48793
0.0833333	3.50975
0.1	3.52074
0.116667	3.52959
0.133333	3.54317
0.15	3.53706
0.166667	3.53066
0.183333	3.54469
0.2	3.54042
0.216667	3.54424
0.233333	3.55034
0.25	3.55156
0.266667	3.55064
0.283333	3.57033
0.3	3.56361
0.316667	3.57216
0.333333	3.56636
0.35	3.56636
0.366667	3.57704
0.383333	3.58437
0.4	3.58147
0.416667	3.58406
0.433333	3.60497
0.45	3.59718
0.466667	3.57582
0.483333	3.58421
0.5	3.58543
0.516667	3.57933
0.533333	3.57658
0.55	3.57826
0.566667	3.58543
0.583333	3.58849
0.6	3.60069
0.616667	3.59657
0.633333	3.57185
0.65	3.56194
0.666667	3.54942
0.683333	3.53554
0.7	3.52882
0.716667	3.55309
0.733333	3.55507
0.75	3.55278
0.766667	3.56728
0.783333	3.56514
0.8	3.57124
0.816667	3.57262
0.833333	3.57796
0.85	3.58833
0.866667	3.59108
0.883333	3.58528
0.9	3.60664
0.916667	3.59215
0.933333	3.60207
0.95	3.61305
0.966667	3.61443
0.983333	3.60634
1	3.60039
1.01667	3.59917
1.03333	3.60634
1.05	3.62602
1.06667	3.61702
1.08333	3.61229
1.1	3.62602
1.11667	3.64479
1.13333	3.64082
1.15	3.66249
1.16667	3.67165
1.18333	3.64998
1.2	3.65196
1.21667	3.65654
1.23333	3.65654
1.25	3.66768
1.26667	3.66203
1.28333	3.65852
1.3	3.65959
1.31667	3.64967
1.33333	3.66249
1.35	3.65135
1.36667	3.6573
1.38333	3.65288
1.4	3.66478
1.41667	3.64281
1.43333	3.64891
1.45	3.63426
1.46667	3.65974
1.48333	3.66692
1.5	3.68828
1.51667	3.69011
1.53333	3.67973
1.55	3.68813
1.56667	3.68004
1.58333	3.68614
1.6	3.68355
1.61667	3.68462
1.63333	3.69881
1.65	3.69545
1.66667	3.6924
1.68333	3.70659
1.7	3.71132
1.71667	3.71391
1.73333	3.70995
1.75	3.70827
1.76667	3.72734
1.78333	3.72337
1.8	3.72582
1.81667	3.7159
1.83333	3.70186
1.85	3.71681
1.86667	3.72505
1.88333	3.7217
1.9	3.71712
1.91667	3.72276
1.93333	3.73756
1.95	3.73146
1.96667	3.7249
1.98333	3.73436
2	3.72871
2.01667	3.72032
2.03333	3.71651
2.05	3.71696
2.06667	3.74092
2.08333	3.74886
2.1	3.74611
2.11667	3.74733
2.13333	3.73146
2.15	3.7429
2.16667	3.74397
2.18333	3.76137
2.2	3.76213
2.21667	3.7693
2.23333	3.77113
2.25	3.77007
2.26667	3.78426
2.28333	3.78471
2.3	3.80287
2.31667	3.78441
2.33333	3.78578
2.35	3.79356
2.36667	3.78273
2.38333	3.8015
2.4	3.79478
2.41667	3.81828
2.43333	3.8221
2.45	3.8166
2.46667	3.81599
2.48333	3.82362
2.5	3.82652
2.51667	3.82698
2.53333	3.82088
2.55	3.84331
2.56667	3.84926
2.58333	3.83278
2.6	3.83842
2.61667	3.82454
2.63333	3.82637
2.65	3.83675
2.66667	3.83614
2.68333	3.82912
2.7	3.86498
2.71667	3.85475
2.73333	3.84636
2.75	3.83614
2.76667	3.83675
2.78333	3.83217
2.8	3.84377
2.81667	3.85048
2.83333	3.83324
2.85	3.8401
2.86667	3.87184
2.88333	3.85826
2.9	3.84544
2.91667	3.86192
2.93333	3.86833
2.95	3.84636
2.96667	3.85368
2.98333	3.85643
3	3.85017
3.01667	3.84712
3.03333	3.85399
3.05	3.84468
3.06667	3.8607
3.08333	3.86604
3.1	3.86101
3.11667	3.86635
3.13333	3.89046
3.15	3.88176
3.16667	3.8781
3.18333	3.87032
3.2	3.87962
3.21667	3.89427
3.23333	3.88664
3.25	3.88527
3.26667	3.89076
3.28333	3.89076
3.3	3.88573
3.31667	3.87795
3.33333	3.87291
3.35	3.87962
3.36667	3.86421
3.38333	3.88298
3.4	3.8633
3.41667	3.85384
3.43333	3.85002
3.45	3.84468
3.46667	3.86101
3.48333	3.86986
3.5	3.86482
3.51667	3.87184
3.53333	3.87306
3.55	3.87718
3.56667	3.86757
3.58333	3.8813
3.6	3.88954
3.61667	3.8929
3.63333	3.87901
3.65	3.88695
3.66667	3.88374
3.68333	3.8842
3.7	3.89092
3.71667	3.881
3.73333	3.88054
3.75	3.88054
3.76667	3.87947
3.78333	3.87718
3.8	3.87505
3.81667	3.88771
3.83333	3.87932
3.85	3.87749
3.86667	3.88512
3.88333	3.88969
3.9	3.88451
3.91667	3.90587
3.93333	3.88588
3.95	3.87718
3.96667	3.87291
3.98333	3.87459
4	3.86971
4.01667	3.85674
4.03333	3.8662
4.05	3.86009
4.06667	3.86314
4.08333	3.86742
4.1	3.85033
4.11667	3.85613
4.13333	3.8607
4.15	3.8633
4.16667	3.8546
4.18333	3.83812
4.2	3.85292
4.21667	3.8517
4.23333	3.85262
4.25	3.85216
4.26667	3.84743
4.28333	3.84483
4.3	3.83369
4.31667	3.82469
4.33333	3.82851
4.35	3.834
4.36667	3.84041
4.38333	3.83095
4.4	3.81859
4.41667	3.81676
4.43333	3.83614
4.45	3.82866
4.46667	3.82607
4.48333	3.82607
4.5	3.80989
4.51667	3.82469
4.53333	3.81508
4.55	3.80226
4.56667	3.80608
4.58333	3.82393
4.6	3.81172
4.61667	3.80852
4.63333	3.79845
4.65	3.82088
4.66667	3.82256
4.68333	3.80577
4.7	3.81248
4.71667	3.79112
4.73333	3.8047
4.75	3.81065
4.76667	3.80013
4.78333	3.79417
4.8	3.7867
4.81667	3.78136
4.83333	3.7751
4.85	3.78624
4.86667	3.80684
4.88333	3.79066
4.9	3.79402
4.91667	3.77022
4.93333	3.77693
4.95	3.78593
4.96667	3.79158
4.98333	3.78899
5	3.78014
5.01667	3.78639
5.03333	3.78929
5.05	3.77754
5.06667	3.76884
5.08333	3.77693
5.1	3.77068
5.11667	3.76534
5.13333	3.75969
5.15	3.75664
5.16667	3.7542
5.18333	3.75786
5.2	3.7455
5.21667	3.73726
5.23333	3.7394
5.25	3.74275
5.26667	3.74321
5.28333	3.7368
5.3	3.72978
5.31667	3.73055
5.33333	3.74184
5.35	3.73512
5.36667	3.73299
5.38333	3.73726
5.4	3.72047
5.41667	3.72459
5.43333	3.71223
5.45	3.71849
5.46667	3.72002
5.48333	3.71269
5.5	3.70308
5.51667	3.68904
5.53333	3.70018
5.55	3.71056
5.56667	3.70186
5.58333	3.69896
5.6	3.69682
5.61667	3.67821
5.63333	3.69194
5.65	3.68065
5.66667	3.6747
5.68333	3.65913
5.7	3.64845
5.71667	3.66158
5.73333	3.65288
5.75	3.65257
5.76667	3.65837
5.78333	3.66173
5.8	3.6689
5.81667	3.67638
5.83333	3.65166
5.85	3.65257
5.86667	3.63899
5.88333	3.63869
5.9	3.63976
5.91667	3.63808
5.93333	3.64235
5.95	3.6367
5.96667	3.62495
5.98333	3.63304
6	3.61351
6.01667	3.60344
6.03333	3.6216
6.05	3.61733
6.06667	3.61977
6.08333	3.60893
6.1	3.61
6.11667	3.60695
6.13333	3.6071
6.15	3.592
6.16667	3.59444
6.18333	3.601
6.2	3.59871
6.21667	3.59612
6.23333	3.60176
6.25	3.60588
6.26667	3.59291
6.28333	3.60161
6.3	3.61183
6.31667	3.60603
6.33333	3.59657
6.35	3.59215
6.36667	3.59627
6.38333	3.60207
6.4	3.57994
6.41667	3.57567
6.43333	3.58284
6.45	3.58177
6.46667	3.57246
6.48333	3.56087
6.5	3.56636
6.51667	3.57979
6.53333	3.58635
6.55	3.60298
6.56667	3.59612
6.58333	3.59795
6.6	3.60207
6.61667	3.6042
6.63333	3.58864
6.65	3.59077
6.66667	3.59489
6.68333	3.59367
6.7	3.58833
6.71667	3.58543
6.73333	3.56957
6.75	3.56667
6.76667	3.56392
6.78333	3.56377
6.8	3.56087
6.81667	3.56743
6.83333	3.563
6.85	3.55583
6.86667	3.54561
6.88333	3.56712
6.9	3.54424
6.91667	3.56133
6.93333	3.56712
6.95	3.5569
6.96667	3.53706
6.98333	3.54561
7	3.5363
7.01667	3.55202
7.03333	3.54027
7.05	3.5537
7.06667	3.53676
7.08333	3.54134
7.1	3.53859
7.11667	3.55751
7.13333	3.54729
7.15	3.53859
7.16667	3.5453
7.18333	3.55705
7.2	3.55537
7.21667	3.55141
7.23333	3.55736
7.25	3.54851
7.26667	3.53462
7.28333	3.54607
7.3	3.53706
7.31667	3.53172
7.33333	3.54637
7.35	3.53615
7.36667	3.5305
7.38333	3.5186
7.4	3.5276
7.41667	3.53951
7.43333	3.54805
7.45	3.5453
7.46667	3.56071
7.48333	3.5688
7.5	3.56392
7.51667	3.55736
7.53333	3.55034
7.55	3.54652
7.56667	3.55583
7.58333	3.55644
7.6	3.53813
7.61667	3.54118
7.63333	3.52242
7.65	3.54256
7.66667	3.53966
7.68333	3.52943
7.7	3.52379
7.71667	3.53554
7.73333	3.52409
7.75	3.53981
7.76667	3.53905
7.78333	3.55751
7.8	3.54744
7.81667	3.54836
7.83333	3.57155
7.85	3.55919
7.86667	3.56133
7.88333	3.56743
7.9	3.56895
7.91667	3.56438
7.93333	3.57903
7.95	3.57094
7.96667	3.56651
7.98333	3.57613
8	3.58498
8.01667	3.59123
8.03333	3.58192
8.05	3.56804
8.06667	3.57033
8.08333	3.58925
8.1	3.58589
8.11667	3.58604
8.13333	3.57292
8.15	3.55217
8.16667	3.5717
8.18333	3.58208
8.2	3.58376
8.21667	3.57384
8.23333	3.58406
8.25	3.57307
8.26667	3.57552
8.28333	3.5865
8.3	3.5807
8.31667	3.59032
8.33333	3.58757
8.35	3.58131
8.36667	3.60039
8.38333	3.59932
8.4	3.60588
8.41667	3.61687
8.43333	3.60954
8.45	3.60466
8.46667	3.60008
8.48333	3.60436
8.5	3.59779
8.51667	3.6039
8.53333	3.62541
8.55	3.6277
8.56667	3.62358
8.58333	3.62556
8.6	3.62404
8.61667	3.62984
8.63333	3.62251
8.65	3.62495
8.66667	3.62511
8.68333	3.63594
8.7	3.64326
8.71667	3.62785
8.73333	3.64143
8.75	3.66097
8.76667	3.63808
8.78333	3.648
8.8	3.6422
8.81667	3.65074
8.83333	3.65273
8.85	3.64098
8.86667	3.63335
8.88333	3.62938
8.9	3.63258
8.91667	3.63823
8.93333	3.63274
8.95	3.63686
8.96667	3.64601
8.98333	3.65425
9	3.66112
9.01667	3.64067
9.03333	3.65471
9.05	3.65929
9.06667	3.66661
9.08333	3.65929
9.1	3.67027
9.11667	3.67851
9.13333	3.65959
9.15	3.65486
9.16667	3.65974
9.18333	3.64891
9.2	3.66707
9.21667	3.65257
9.23333	3.66188
9.25	3.67073
9.26667	3.68538
9.28333	3.67378
9.3	3.68614
9.31667	3.6834
9.33333	3.67821
9.35	3.67806
9.36667	3.68919
9.38333	3.68767
9.4	3.68858
9.41667	3.68095
9.43333	3.67638
9.45	3.67226
9.46667	3.68752
9.48333	3.69179
9.5	3.70659
9.51667	3.71346
9.53333	3.71483
9.55	3.70873
9.56667	3.70155
9.58333	3.72536
9.6	3.72032
9.61667	3.71101
9.63333	3.71605
9.65	3.71986
9.66667	3.71529
9.68333	3.71544
9.7	3.70567
9.71667	3.71681
9.73333	3.72826
9.75	3.73711
9.76667	3.72978
9.78333	3.72765
9.8	3.72139
9.81667	3.72658
9.83333	3.7368
9.85	3.74168
9.86667	3.75694
9.88333	3.7484
9.9	3.75511
9.91667	3.7513
9.93333	3.75542
9.95	3.74474
9.96667	3.74748
9.98333	3.76427
10	3.78258
10.0167	3.77602
10.0333	3.78044
10.05	3.78746
10.0667	3.7925
10.0833	3.79997
10.1	3.79845
10.1167	3.78487
10.1333	3.78868
10.15	3.80547
10.1667	3.80363
10.1833	3.80852
10.2	3.81584
10.2167	3.80638
10.2333	3.79768
10.25	3.80028
10.2667	3.80104
10.2833	3.80592
10.3	3.79692
10.3167	3.80608
10.3333	3.80516
10.35	3.80165
10.3667	3.79448
10.3833	3.79128
10.4	3.80623
10.4167	3.80394
10.4333	3.80135
10.45	3.8163
10.4667	3.81203
10.4833	3.80455
10.5	3.80516
10.5167	3.79951
10.5333	3.80684
10.55	3.8131
10.5667	3.80379
10.5833	3.80943
10.6	3.80333
10.6167	3.78426
10.6333	3.79402
10.65	3.80089
10.6667	3.80684
10.6833	3.80211
10.7	3.79494
10.7167	3.81294
10.7333	3.82225
10.75	3.81264
10.7667	3.79875
10.7833	3.80196
10.8	3.80699
10.8167	3.79326
10.8333	3.79906
10.85	3.78853
10.8667	3.79189
10.8833	3.76946
10.9	3.76335
10.9167	3.77983
10.9333	3.76366
10.95	3.75771
10.9667	3.76884
10.9833	3.75511
11	3.74596
11.0167	3.73726
11.0333	3.73405
11.05	3.72688
11.0667	3.73467
11.0833	3.72688
11.1	3.73528
11.1167	3.73817
11.1333	3.71956
11.15	3.70735
11.1667	3.70705
11.1833	3.69621
11.2	3.69667
11.2167	3.70232
11.2333	3.68828
11.25	3.67577
11.2667	3.66066
11.2833	3.64937
11.3	3.65501
11.3167	3.64311
11.3333	3.64708
11.35	3.62907
11.3667	3.61702
11.3833	3.60924
11.4	3.59444
11.4167	3.59154
11.4333	3.57491
11.45	3.57155
11.4667	3.55446
11.4833	3.54042
11.5	3.53462
11.5167	3.52165
11.5333	3.50853
11.55	3.48579
11.5667	3.48564
11.5833	3.45955
11.6	3.44017
11.6167	3.42949
11.6333	3.40263
11.65	3.38127
11.6667	3.36769
11.6833	3.33962
11.7	3.33199
11.7167	3.31459
11.7333	3.29689
11.75	3.27065
11.7667	3.25432
11.7833	3.24593
11.8	3.22182
11.8167	3.18504
11.8333	3.16383
11.85	3.13881
11.8667	3.12553
11.8833	3.10524
11.9	3.07304
11.9167	3.07182
11.9333	3.04955
11.95	3.03841
11.9667	3.00652
11.9833	2.98012
12	2.97066
12.0167	2.93694
12.0333	2.88582
12.05	2.86018
12.0667	2.8492
12.0833	2.83821
12.1	2.80602
12.1167	2.77565
12.1333	2.75169
12.15	2.72621
12.1667	2.69768
12.1833	2.65221
12.2	2.61848
12.2167	2.60002
12.2333	2.56767
12.25	2.53426
12.2667	2.50572
12.2833	2.48528
12.3	2.45476
12.3167	2.42104
12.3333	2.38228
12.35	2.36946
12.3667	2.33955
12.3833	2.30827
12.4	2.27516
12.4167	2.2364
12.4333	2.21199
12.45	2.18361
12.4667	2.17247
12.4833	2.14607
12.5	2.12456
12.5167	2.08931
12.5333	2.07359
12.55	2.05147
12.5667	2.02049
12.5833	2.00905
12.6	1.97212
12.6167	1.93718
12.6333	1.92116
12.65	1.88316
12.6667	1.85783
12.6833	1.83586
12.7	1.81114
12.7167	1.79848
12.7333	1.79375
12.75	1.78398
12.7667	1.77849
12.7833	1.75789
12.8	1.73164
12.8167	1.70189
12.8333	1.68251
12.85	1.67046
12.8667	1.661
12.8833	1.64101
12.9	1.63277
12.9167	1.62025
12.9333	1.62086
12.95	1.61125
12.9667	1.59386
12.9833	1.59081
13	1.58104
13.0167	1.57616
13.0333	1.56288
13.05	1.56136
13.0667	1.55968
13.0833	1.54274
13.1	1.55251
13.1167	1.55647
13.1333	1.55357
13.15	1.55617
13.1667	1.56731
13.1833	1.57478
13.2	1.59218
13.2167	1.59309
13.2333	1.58653
13.25	1.60652
13.2667	1.61293
13.2833	1.6169
13.3	1.63872
13.3167	1.63918
13.3333	1.6407
13.35	1.6468
13.3667	1.66527
13.3833	1.65504
13.4	1.68556
13.4167	1.68312
13.4333	1.69685
13.45	1.72371
13.4667	1.72447
13.4833	1.72752
13.5	1.74904
13.5167	1.7643
13.5333	1.78322
13.55	1.79924
13.5667	1.80672
13.5833	1.81343
13.6	1.83891
13.6167	1.85768
13.6333	1.86714
13.65	1.87111
13.6667	1.89644
13.6833	1.91048
13.7	1.93489
13.7167	1.93748
13.7333	1.93611
13.75	1.96632
13.7667	1.97517
13.7833	1.97365
13.8	2.00279
13.8167	2.03758
13.8333	2.04887
13.85	2.07146
13.8667	2.09526
13.8833	2.1122
13.9	2.12975
13.9167	2.15477
13.9333	2.18483
13.95	2.19429
13.9667	2.22267
13.9833	2.22389
14	2.24525
14.0167	2.24907
14.0333	2.27211
14.05	2.29637
14.0667	2.31331
14.0833	2.3365
14.1	2.35756
14.1167	2.3774
14.1333	2.41371
14.15	2.42241
14.1667	2.42622
14.1833	2.45003
14.2	2.46498
14.2167	2.47566
14.2333	2.48985
14.25	2.51778
14.2667	2.54311
14.2833	2.5695
14.3	2.55577
14.3167	2.59163
14.3333	2.61223
14.35	2.61971
14.3667	2.63802
14.3833	2.658
14.4	2.68806
14.4167	2.69905
14.4333	2.72621
14.45	2.74849
14.4667	2.75856
14.4833	2.77824
14.5	2.78267
14.5167	2.79427
14.5333	2.80693
14.55	2.80998
14.5667	2.82661
14.5833	2.84187
14.6	2.85774
14.6167	2.88414
14.6333	2.89619
14.65	2.91771
14.6667	2.91588
14.6833	2.93633
14.7	2.93938
14.7167	2.9351
14.7333	2.93663
14.75	2.94609
14.7667	2.95586
14.7833	2.99171
14.8	3.00423
14.8167	3.00606
14.8333	3.00102
14.85	3.02696
14.8667	3.0262
14.8833	3.04558
14.9	3.05595
14.9167	3.07472
14.9333	3.07777
14.95	3.0909
14.9667	3.09288
14.9833	3.10829
15	3.10371
15.0167	3.11211
15.0333	3.10768
15.05	3.12935
15.0667	3.13972
15.0833	3.12065
15.1	3.12553
15.1167	3.13805
15.1333	3.15758
15.15	3.17543
15.1667	3.18184
15.1833	3.19572
15.2	3.20061
15.2167	3.20641
15.2333	3.21846
15.25	3.22182
15.2667	3.22411
15.2833	3.2206
15.3	3.22853
15.3167	3.23647
15.3333	3.25127
15.35	3.24348
15.3667	3.2412
15.3833	3.25768
15.4	3.25996
15.4167	3.28453
15.4333	3.28194
15.45	3.25996
15.4667	3.27766
15.4833	3.29002
15.5	3.30666
15.5167	3.28102
15.5333	3.28957
15.55	3.28789
15.5667	3.29506
15.5833	3.3062
15.6	3.30849
15.6167	3.31596
15.6333	3.3271
15.65	3.3329
15.6667	3.34511
15.6833	3.34892
15.7	3.35243
15.7167	3.3535
15.7333	3.35732
15.75	3.36494
15.7667	3.35655
15.7833	3.36021
15.8	3.37074
15.8167	3.36067
15.8333	3.37639
15.85	3.37181
15.8667	3.38615
15.8833	3.38631
15.9	3.3799
15.9167	3.3886
15.9333	3.395
15.95	3.40569
15.9667	3.42278
15.9833	3.40584
16	3.40813
16.0167	3.40736
16.0333	3.40431
16.05	3.41469
16.0667	3.40996
16.0833	3.42552
16.1	3.42339
16.1167	3.42751
16.1333	3.42949
16.15	3.43452
16.1667	3.4269
16.1833	3.44139
16.2	3.43742
16.2167	3.43544
16.2333	3.43498
16.25	3.44322
16.2667	3.45909
16.2833	3.45665
16.3	3.4565
16.3167	3.45833
16.3333	3.47755
16.35	3.46474
16.3667	3.46596
16.3833	3.47343
16.4	3.48412
16.4167	3.47679
16.4333	3.46306
16.45	3.49052
16.4667	3.49205
16.4833	3.48549
16.5	3.47771
16.5167	3.48244
16.5333	3.49007
16.55	3.48549
16.5667	3.48778
16.5833	3.49251
16.6	3.48259
16.6167	3.49388
16.6333	3.49892
16.65	3.50334
16.6667	3.48991
16.6833	3.48839
16.7	3.51707
16.7167	3.51479
16.7333	3.51295
16.75	3.51433
16.7667	3.52242
16.7833	3.52562
16.8	3.5334
16.8167	3.52684
16.8333	3.51967
16.85	3.53325
16.8667	3.53844
16.8833	3.53264
16.9	3.53951
16.9167	3.51723
16.9333	3.5215
16.95	3.53142
16.9667	3.54301
16.9833	3.54668
17	3.52867
17.0167	3.54042
17.0333	3.54836
17.05	3.5453
17.0667	3.55019
17.0833	3.54424
17.1	3.55843
17.1167	3.55949
17.1333	3.55217
17.15	3.54805
17.1667	3.54286
17.1833	3.52791
17.2	3.53859
17.2167	3.54637
17.2333	3.54225
17.25	3.54637
17.2667	3.54576
17.2833	3.53676
17.3	3.53203
17.3167	3.52669
17.3333	3.53172
17.35	3.54347
17.3667	3.54698
17.3833	3.54408
17.4	3.55934
17.4167	3.55446
17.4333	3.54881
17.45	3.55812
17.4667	3.5598
17.4833	3.55736
17.5	3.56255
17.5167	3.55965
17.5333	3.56468
17.55	3.56209
17.5667	3.57506
17.5833	3.57643
17.6	3.57658
17.6167	3.59795
17.6333	3.57903
17.65	3.58116
17.6667	3.59169
17.6833	3.60939
17.7	3.59642
17.7167	3.5955
17.7333	3.60359
17.75	3.60695
17.7667	3.62373
17.7833	3.62083
17.8	3.62373
17.8167	3.60924
17.8333	3.60924
17.85	3.62297
17.8667	3.61382
17.8833	3.61
17.9	3.61946
17.9167	3.61549
17.9333	3.60634
17.95	3.61961
17.9667	3.62129
17.9833	3.62785
18	3.61855
18.0167	3.61839
18.0333	3.63503
18.05	3.61733
18.0667	3.6274
18.0833	3.63213
18.1	3.6512
18.1167	3.63319
18.1333	3.64738
18.15	3.63731
18.1667	3.6367
18.1833	3.64647
18.2	3.6393
18.2167	3.648
18.2333	3.65639
18.25	3.64174
18.2667	3.6483
18.2833	3.65486
18.3	3.64632
18.3167	3.64494
18.3333	3.63228
18.35	3.62358
18.3667	3.64113
18.3833	3.64296
18.4	3.64586
18.4167	3.6335
18.4333	3.62923
18.45	3.63228
18.4667	3.63411
18.4833	3.63762
18.5	3.63457
18.5167	3.62633
18.5333	3.6306
18.55	3.63731
18.5667	3.63609
18.5833	3.65105
18.6	3.6631
18.6167	3.65501
18.6333	3.64204
18.65	3.64143
18.6667	3.64052
18.6833	3.64616
18.7	3.6483
18.7167	3.6541
18.7333	3.67104
18.75	3.64479
18.7667	3.64845
18.7833	3.66951
18.8	3.6721
18.8167	3.67912
18.8333	3.6808
18.85	3.6689
18.8667	3.67561
18.8833	3.68111
18.9	3.68431
18.9167	3.6808
18.9333	3.68507
18.95	3.70293
18.9667	3.69347
18.9833	3.71025
19	3.713
19.0167	3.70842
19.0333	3.71605
19.05	3.7072
19.0667	3.71223
19.0833	3.72078
19.1	3.73299
19.1167	3.70842
19.1333	3.71773
19.15	3.73421
19.1667	3.72124
19.1833	3.71971
19.2	3.71803
19.2167	3.71346
19.2333	3.70262
19.25	3.7162
19.2667	3.73665
19.2833	3.73909
19.3	3.7397
19.3167	3.73955
19.3333	3.73848
19.35	3.7394
19.3667	3.7693
19.3833	3.79204
19.4	3.81264
19.4167	3.82256
19.4333	3.84163
19.45	3.88741
19.4667	3.92036
19.4833	3.96355
19.5	4.01344
19.5167	4.05525
19.5333	4.123
19.55	4.17992
19.5667	4.2585
19.5833	4.35463
19.6	4.44786
19.6167	4.53239
19.6333	4.62959
19.65	4.72694
19.6667	4.80675
19.6833	4.9102
19.7	4.99748
19.7167	5.08354
19.7333	5.15129
19.75	5.19737
19.7667	5.24025
19.7833	5.25871
19.8	5.27275
19.8167	5.27351
19.8333	5.2552
19.85	5.21584
19.8667	5.18272
19.8833	5.13618
19.9	5.06599
19.9167	4.99535
19.9333	4.91982
19.95	4.84886
19.9667	4.78508
19.9833	4.70848
20	4.62563
20.0167	4.55223
20.0333	4.49837
20.05	4.44176
20.0667	4.37279
20.0833	4.30794
20.1	4.23851
20.1167	4.18449
20.1333	4.11598
20.15	4.06837
20.1667	3.98979
20.1833	3.90572
20.2	3.83171
20.2167	3.7397
20.2333	3.65257
20.25	3.5363
20.2667	3.40675
20.2833	3.2476
20.3	3.04894
20.3167	2.82585
20.3333	2.56844
20.35	2.2628
20.3667	1.90865
20.3833	1.52306
20.4	1.101
20.4167	0.611954
20.4333	0.0731659
20.45	-0.476151
20.4667	-1.0807
20.4833	-1.69273
20.5	-2.32399
20.5167	-2.98027
20.5333	-3.61458
20.55	-4.25835
20.5667	-4.84306
20.5833	-5.40657
20.6	-5.93025
20.6167	-6.37047
20.6333	-6.77544
20.65	-7.10442
20.6667	-7.35939
20.6833	-7.53838
20.7	-7.64183
20.7167	-7.67357
20.7333	-7.63924
20.75	-7.55287
20.7667	-7.41966
20.7833	-7.24007
20.8	-7.00401
20.8167	-6.74263
20.8333	-6.4637
20.85	-6.19301
20.8667	-5.91011
20.8833	-5.60478
20.9	-5.31105
20.9167	-5.03792
20.9333	-4.77028
20.95	-4.4912
20.9667	-4.24675
20.9833	-3.99147
21	-3.75069
21.0167	-3.52272
21.0333	-3.29735
21.05	-3.0761
21.0667	-2.84843
21.0833	-2.6255
21.1	-2.41081
21.1167	-2.18666
21.1333	-1.95198
21.15	-1.73424
21.1667	-1.54839
21.1833	-1.3253
21.2	-1.1161
21.2167	-0.921249
21.2333	-0.705338
21.25	-0.512314
21.2667	-0.316086
21.2833	-0.116653
21.3	0.0743866
21.3167	0.258713
21.3333	0.41481
21.35	0.568314
21.3667	0.720444
21.3833	0.87059
21.4	1.00105
21.4167	1.13518
21.4333	1.24626
21.45	1.34087
21.4667	1.45699
21.4833	1.53893
21.5	1.61934
21.5167	1.71715
21.5333	1.80458
21.55	1.88713
21.5667	1.97121
21.5833	2.02873
21.6	2.06368
21.6167	2.12364
21.6333	2.18864
21.65	2.24983
21.6667	2.28477
21.6833	2.31667
21.7	2.38213
21.7167	2.40898
21.7333	2.44438
21.75	2.49016
21.7667	2.51411
21.7833	2.53883
21.8	2.57301
21.8167	2.62917
21.8333	2.64
21.85	2.66716
21.8667	2.68089
21.8833	2.69936
21.9	2.71721
21.9167	2.72362
21.9333	2.76238
21.95	2.77748
21.9667	2.78664
21.9833	2.81349
22	2.83333
22.0167	2.83775
22.0333	2.8611
22.05	2.88429
22.0667	2.88139
22.0833	2.89269
22.1	2.89665
22.1167	2.91649
22.1333	2.94029
22.15	2.94518
22.1667	2.96074
22.1833	2.96715
22.2	2.96867
22.2167	2.98256
22.2333	2.97798
22.25	2.99004
22.2667	3.00301
22.2833	3.00392
22.3	3.01369
22.3167	3.01399
22.3333	3.03581
22.35	3.04268
22.3667	3.04329
22.3833	3.06374
22.4	3.06587
22.4167	3.06938
22.4333	3.07259
22.45	3.08113
22.4667	3.09547
22.4833	3.09731
22.5	3.11089
22.5167	3.09593
22.5333	3.10417
22.55	3.10555
22.5667	3.11211
22.5833	3.11974
22.6	3.11958
22.6167	3.13026
22.6333	3.15132
22.65	3.17528
22.6667	3.16719
22.6833	3.17894
22.7	3.17894
22.7167	3.18459
22.7333	3.17772
22.75	3.19115
22.7667	3.19359
22.7833	3.20107
22.8	3.21175
22.8167	3.21419
22.8333	3.2235
22.85	3.23555
22.8667	3.23326
22.8833	3.24486
22.9	3.2412
22.9167	3.22777
22.9333	3.23692
22.95	3.2412
22.9667	3.24333
22.9833	3.2502
23	3.23448
23.0167	3.22762
23.0333	3.24776
23.05	3.26134
23.0667	3.25447
23.0833	3.25478
23.1	3.26393
23.1167	3.27003
23.1333	3.25951
23.15	3.27095
23.1667	3.28972
23.1833	3.28178
23.2	3.28209
23.2167	3.28957
23.2333	3.27705
23.25	3.29918
23.2667	3.29414
23.2833	3.28743
23.3	3.29186
23.3167	3.3033
23.3333	3.33092
23.35	3.34023
23.3667	3.31535
23.3833	3.32375
23.4	3.33153
23.4167	3.33595
23.4333	3.33595
23.45	3.33
23.4667	3.34099
23.4833	3.3297
23.5	3.33702
23.5167	3.33366
23.5333	3.34831
23.55	3.35426
23.5667	3.35976
23.5833	3.37029
23.6	3.36433
23.6167	3.37135
23.6333	3.3651
23.65	3.37669
23.6667	3.38493
23.6833	3.36678
23.7	3.35579
23.7167	3.3625
23.7333	3.37013
23.75	3.35609
23.7667	3.36128
23.7833	3.38585
23.8	3.38997
23.8167	3.37807
23.8333	3.37975
23.85	3.39302
23.8667	3.39623
23.8833	3.38539
23.9	3.39165
23.9167	3.40187
23.9333	3.41545
23.95	3.41316
23.9667	3.40675
23.9833	3.41942
24	3.42598
24.0167	3.43391
24.0333	3.42659
24.05	3.4156
24.0667	3.41866
24.0833	3.43147
24.1	3.43544
24.1167	3.43422
24.1333	3.43788
24.15	3.43758
24.1667	3.4388
24.1833	3.44414
24.2	3.44048
24.2167	3.44765
24.2333	3.44688
24.25	3.44124
24.2667	3.43849
24.2833	3.45528
24.3	3.46718
24.3167	3.46642
24.3333	3.47755
24.35	3.48335
24.3667	3.47328
24.3833	3.489
24.4	3.48778
24.4167	3.48
24.4333	3.49968
24.45	3.47359
24.4667	3.46977
24.4833	3.49327
24.5	3.5041
24.5167	3.49464
24.5333	3.5154
24.55	3.51982
24.5667	3.51524
24.5833	3.51677
24.6	3.51646
24.6167	3.51448
24.6333	3.5099
24.65	3.52745
24.6667	3.5421
24.6833	3.52409
24.7	3.53569
24.7167	3.54195
24.7333	3.53844
24.75	3.53493
24.7667	3.54454
24.7833	3.53828
24.8	3.53188
24.8167	3.52531
24.8333	3.54363
24.85	3.5421
24.8667	3.55415
24.8833	3.53081
24.9	3.54271
24.9167	3.54057
24.9333	3.53996
24.95	3.54851
24.9667	3.54118
24.9833	3.5392
25	3.53401
25.0167	3.545
25.0333	3.536
25.05	3.53828
25.0667	3.56346
25.0833	3.55644
25.1	3.55019
25.1167	3.56773
25.1333	3.55812
25.15	3.56071
25.1667	3.54973
25.1833	3.56224
25.2	3.5717
25.2167	3.56026
25.2333	3.56178
25.25	3.56972
25.2667	3.57964
25.2833	3.57414
25.3	3.56743
25.3167	3.5656
25.3333	3.57597
25.35	3.5862
25.3667	3.58208
25.3833	3.5775
25.4	3.57704
25.4167	3.57216
25.4333	3.57445
25.45	3.58543
25.4667	3.5955
25.4833	3.5833
25.5	3.58192
25.5167	3.58681
25.5333	3.58345
25.55	3.57735
25.5667	3.59077
25.5833	3.60268
25.6	3.5981
25.6167	3.61855
25.6333	3.61153
25.65	3.61336
25.6667	3.60802
25.6833	3.60771
25.7	3.60863
25.7167	3.62007
25.7333	3.62297
25.75	3.60664
25.7667	3.60863
25.7833	3.6039
25.8	3.60191
25.8167	3.60558
25.8333	3.60298
25.85	3.58849
25.8667	3.601
25.8833	3.60329
25.9	3.58742
25.9167	3.60909
25.9333	3.61565
25.95	3.62434
25.9667	3.63075
25.9833	3.61092
26	3.61168
26.0167	3.63091
26.0333	3.62938
26.05	3.6216
26.0667	3.62083
26.0833	3.62602
26.1	3.62251
26.1167	3.63426
26.1333	3.62206
26.15	3.62785
26.1667	3.62373
26.1833	3.63121
26.2	3.62373
26.2167	3.6425
26.2333	3.63075
26.25	3.63625
26.2667	3.64265
26.2833	3.6454
26.3	3.6515
26.3167	3.65318
26.3333	3.64113
26.35	3.63899
26.3667	3.648
26.3833	3.65013
26.4	3.64555
26.4167	3.65089
26.4333	3.67073
26.45	3.6515
26.4667	3.64616
26.4833	3.64296
26.5	3.64113
26.5167	3.63976
26.5333	3.64571
26.55	3.63884
26.5667	3.62831
26.5833	3.61031
26.6	3.6129
26.6167	3.60786
26.6333	3.62526
26.65	3.62892
26.6667	3.61321
26.6833	3.61473
26.7	3.63915
26.7167	3.64403
26.7333	3.6364
26.75	3.63625
26.7667	3.65898
26.7833	3.66142
26.8	3.65593
26.8167	3.65257
26.8333	3.64906
26.85	3.65456
26.8667	3.66707
26.8833	3.66936
26.9	3.68019
26.9167	3.69041
26.9333	3.70049
26.95	3.70079
26.9667	3.71056
26.9833	3.72917
27	3.73558
27.0167	3.76915
27.0333	3.7954
27.05	3.80028
27.0667	3.82896
27.0833	3.85979
27.1	3.8868
27.1167	3.9312
27.1333	3.95103
27.15	3.98949
27.1667	4.01985
27.1833	4.05342
27.2	4.11797
27.2167	4.18037
27.2333	4.23256
27.25	4.29741
27.2667	4.36348
27.2833	4.43245
27.3	4.50447
27.3167	4.56947
27.3333	4.64531
27.35	4.72557
27.3667	4.82445
27.3833	4.92119
27.4	5.00038
27.4167	5.08461
27.4333	5.16045
27.45	5.25368
27.4667	5.35744
27.4833	5.44792
27.5	5.52086
27.5167	5.58556
27.5333	5.67238
27.55	5.74455
27.5667	5.80757
27.5833	5.8596
27.6	5.92552
27.6167	5.95497
27.6333	5.99419
27.65	6.03874
27.6667	6.0685
27.6833	6.08147
27.7	6.08772
27.7167	6.09657
27.7333	6.09703
27.75	6.09978
27.7667	6.07948
27.7833	6.07246
27.8	6.04149
27.8167	6.00899
27.8333	5.98961
27.85	5.94612
27.8667	5.90706
27.8833	5.86571
27.9	5.83336
27.9167	5.77858
27.9333	5.73479
27.95	5.67696
27.9667	5.61638
27.9833	5.55275
28	5.50056
28.0167	5.45204
28.0333	5.39192
28.05	5.34111
28.0667	5.28893
28.0833	5.23598
28.1	5.1815
28.1167	5.15923
28.1333	5.10429
28.15	5.05577
28.1667	5.01335
28.1833	4.96361
28.2	4.91249
28.2167	4.85924
28.2333	4.82674
28.25	4.8069
28.2667	4.76295
28.2833	4.71153
28.3	4.69093
28.3167	4.66042
28.3333	4.6302
28.35	4.59709
28.3667	4.54735
28.3833	4.52095
28.4	4.49348
28.4167	4.47029
28.4333	4.45839
28.45	4.44038
28.4667	4.40941
28.4833	4.38484
28.5	4.36165
28.5167	4.34883
28.5333	4.32762
28.55	4.30717
28.5667	4.2791
28.5833	4.25682
28.6	4.24324
28.6167	4.2202
28.6333	4.21257
28.65	4.19716
28.6667	4.18755
28.6833	4.17809
28.7	4.16832
28.7167	4.14909
28.7333	4.12514
28.75	4.10774
28.7667	4.09538
28.7833	4.0963
28.8	4.09203
28.8167	4.0818
28.8333	4.05708
28.85	4.06502
28.8667	4.05052
28.8833	4.04732
28.9	4.02931
28.9167	4.01894
28.9333	3.99773
28.95	3.98872
28.9667	3.99467
28.9833	3.97789
29	3.97774
29.0167	3.97591
29.0333	3.96873
29.05	3.96431
29.0667	3.94814
29.0833	3.92525
29.1	3.9373
29.1167	3.92586
29.1333	3.93059
29.15	3.9254
29.1667	3.90251
29.1833	3.90678
29.2	3.91228
29.2167	3.91487
29.2333	3.91106
29.25	3.9048
29.2667	3.8871
29.2833	3.87581
29.3	3.87825
29.3167	3.87093
29.3333	3.85414
29.35	3.84514
29.3667	3.84026
29.3833	3.83751
29.4	3.82973
29.4167	3.85475
29.4333	3.85414
29.45	3.83705
29.4667	3.84102
29.4833	3.84972
29.5	3.82561
29.5167	3.83156
29.5333	3.82225
29.55	3.81355
29.5667	3.8076
29.5833	3.8047
29.6	3.80943
29.6167	3.79768
29.6333	3.78426
29.65	3.79066
29.6667	3.79326
29.6833	3.78487
29.7	3.77831
29.7167	3.77144
29.7333	3.77663
29.75	3.77174
29.7667	3.76488
29.7833	3.75343
29.8	3.7603
29.8167	3.7603
29.8333	3.75252
29.85	3.74474
29.8667	3.76305
29.8833	3.75389
29.9	3.7722
29.9167	3.76061
29.9333	3.74565
29.95	3.75511
29.9667	3.73665
29.9833	3.72826
30	3.71254

## Sheet: MW Results
Administrative Information
File name	ICF_04_12_2024-0001.sample
Analysed by	OBPC
Date of analysis	06 December 2024 14:01:26
Analysis comments
Analysis Module	GPC Analysis
MW Averages
Peaks	Mp (g/mol)	Mn (g/mol)	Mw (g/mol)	Mz (g/mol)	Mz+1 (g/mol)	Mv (g/mol)	PD
Peak 1	148746	24877	199594	566013	970559	510744	8.02323
Sample Parameters
Injection volume (µL)	200
Concentration options	Undefined
Concentration (mg/mL)	1
dn/dc (mL/g)	0.1
UV extinction coefficient [(mg/mL)-¹][cm-¹]	1
Mark-Houwink K ((10e-5) dL/g)	14.1
Mark-Houwink Alpha	0.7
Concentration Detector Used in Analysis	RI
Baseline regions	Start (mins)	End (mins)
Baseline region 1	9.85	10.2333
Baseline region 2	17.5	17.8333
Peaks	Start (mins)	End (mins)
Peak 1	10.8167	16.75
	Trace	Peak Max RT (mins)	Peak Area (mV.s)	Peak Height (mV)
	RI	13.0833	308.349	-2.1614
Flowrate region	Start (mins)	End (mins)
IDD
Reference detector	Undefined
IDD Undefined (secs)	0
Last modified by	OBPC
Last modified date	06 December 2024 14:01:26
Comments
System Calibration
Detector Constants
Entered Parameters For Concentration
Concentration (mg/mL)	0
Injection volume (µL)	0
dn/dc (mL/g)	0
UV extinction coefficient [(mg/mL)-¹][cm-¹]	0
Eluent refractive index	0
Flow rate (mL/min)	0
Comments
Entered Parameters For LS
Mp	0
LS wavelength (nm)	0
Comments
Entered Parameters For Viscometer
Known IV (dL/g)	0
Use Constant Inlet Pressure	No
Comments
System Calibration Information
Created by	OBPC
Creation date	29 October 2024 11:18:00
Last modified by	OBPC
Last modified date	29 October 2024 11:18:00
Information
Sample file used for calibration
Concentration Regions
Baseline regions	Start (mins)	End (mins)
Peaks	Start (mins)	End (mins)
Flowrate region	Start (mins)	End (mins)
LS Regions
Baseline regions	Start (mins)	End (mins)
Peaks	Start (mins)	End (mins)
Flowrate region	Start (mins)	End (mins)
VS Regions
Baseline regions	Start (mins)	End (mins)
Peaks	Start (mins)	End (mins)
Flowrate region	Start (mins)	End (mins)
System Calibration Peak Information
Channel	Peak Max RT (mins)	Peak Height (mV)	Peak Area (mV.s)
Flowrate Information
FRM Name
FRM RT (mins)	0
FRCF	1
Column Calibration
Name	2024-10-29-001
Created By	OBPC
Creation Date	29/10/2024 16:43:21
Last Modified By	OBPC
Last Modified	29/10/2024 16:46:00
High Limit RT (mins)	10.3167
Low Limit RT (mins)	17.05
High Limit MW	6542896
Low Limit MW	585
K (Input) ((10e-5) dL/g)	14.1
Alpha (Input)	0.7
Calibration Flow Marker Name
Calibration Flow Marker RT (mins)	0
Calibration Comments	GPC Column Calibration created 29 October 2024 by OBPC GPC Column Calibration amended 29 October 2024 by OBPC GPC Column Calibration amended 29 October 2024 by OBPC
Calibration Type	GPC Narrow Standard
Curve Fit Type	Polynomial
Order Of Curve Fit	5
Number Of Points	11
Curve Fit Equation	y = - 0.0006266x^5 + 0.04142x^4 - 1.085x^3 + 14.06x^2 - 90.8x + 242.2
Coeff a	242.186
Coeff b	-90.7983
Coeff c	14.0588
Coeff d	-1.08465
Coeff e	0.0414232
Coeff f	-0.000626569
Residual Sum Of Squares	0.000581819
Corrected Sum Of Squares	18.6999
Coefficient Of Determination	0.999969
Standard Y Error Estimate	0.0107872
Linear Correlation Coefficient	-0.999868

## Sheet: Slice Table
Slice Table
RT (mins)	RI	Norm Ht	Cum Ht	Mw (g/mol)	logM	dwdlogM	Outside Calib	Peak
10.8167	0.0338602	-0.000109865	1	3366131	6.52713	0	No	1
10.8333	0.0400649	-0.000129997	1	3294063	6.51773	0	No	1
10.85	0.0299426	-9.71534e-05	1	3223580	6.50834	0	No	1
10.8667	0.0337059	-0.000109364	1	3154641	6.49895	0	No	1
10.8833	0.0116818	-3.79034e-05	1	3087208	6.48957	0	No	1
10.9	0.00598463	-1.94181e-05	1	3021243	6.48019	0	No	1
10.9167	0.0228705	-7.42067e-05	1	2956707	6.47081	0	No	1
10.9333	0.00710248	-2.30451e-05	1	2893567	6.46143	0	No	1
10.95	0.00155789	-5.05482e-06	1	2831786	6.45206	0	No	1
10.9667	0.0131031	-4.25152e-05	1	2771333	6.44269	0	No	1
10.9833	-0.000223429	7.2495e-07	0.999993	2712173	6.43332	0.0015912	No	1
11	-0.00897237	2.91122e-05	0.999964	2654277	6.42395	0.00453964	No	1
11.0167	-0.0172635	5.60142e-05	0.999912	2597613	6.41457	0.00645785	No	1
11.0333	-0.0200615	6.50928e-05	0.999844	2542153	6.4052	0.00811128	No	1
11.05	-0.0268268	8.70438e-05	0.999769	2487868	6.39583	0.00786352	No	1
11.0667	-0.0186385	6.04755e-05	0.999696	2434729	6.38645	0.00772097	No	1
11.0833	-0.0260142	8.44069e-05	0.999625	2382711	6.37707	0.00747257	No	1
11.1	-0.0172155	5.58583e-05	0.999565	2331787	6.36769	0.00537831	No	1
11.1167	-0.01391	4.51331e-05	0.999502	2281933	6.3583	0.0079503	No	1
11.1333	-0.0321194	0.000104216	0.999403	2233122	6.34891	0.0131276	No	1
11.15	-0.0439201	0.000142505	0.99927	2185333	6.33952	0.0151396	No	1
11.1667	-0.0438189	0.000142177	0.99912	2138541	6.33012	0.0169119	No	1
11.1833	-0.0542463	0.00017601	0.998953	2092725	6.32071	0.0185498	No	1
11.2	-0.0533822	0.000173207	0.998784	2047862	6.3113	0.0173465	No	1
11.2167	-0.0473301	0.00015357	0.998614	2003932	6.30188	0.018639	No	1
11.2333	-0.0609619	0.0001978	0.998418	1960914	6.29246	0.0230519	No	1
11.25	-0.0730677	0.000237079	0.998179	1918787	6.28303	0.0276406	No	1
11.2667	-0.0877676	0.000284775	0.997897	1877533	6.27359	0.0320113	No	1
11.2833	-0.0986528	0.000320094	0.997591	1837132	6.26414	0.0328131	No	1
11.3	-0.0926007	0.000300457	0.997277	1797566	6.25468	0.0337169	No	1
11.3167	-0.104096	0.000337756	0.996952	1758818	6.24522	0.0349052	No	1
11.3333	-0.0997226	0.000323565	0.996611	1720869	6.23575	0.0371343	No	1
11.35	-0.117322	0.000380668	0.996235	1683703	6.22627	0.0420962	No	1
11.3667	-0.12897	0.000418462	0.99582	1647303	6.21677	0.0453011	No	1
11.3833	-0.136345	0.000442393	0.995372	1611653	6.20727	0.0489664	No	1
11.4	-0.15074	0.000489099	0.994893	1576738	6.19776	0.0517904	No	1
11.4167	-0.153233	0.000497188	0.994385	1542542	6.18824	0.0549182	No	1
11.4333	-0.169459	0.000549834	0.993846	1509050	6.1787	0.0581153	No	1
11.45	-0.172409	0.000559408	0.993276	1476247	6.16916	0.0613812	No	1
11.4667	-0.189093	0.00061354	0.992665	1444121	6.1596	0.0664492	No	1
11.4833	-0.202724	0.000657771	0.992014	1412655	6.15004	0.0695907	No	1
11.5	-0.208116	0.000675266	0.991334	1381838	6.14046	0.0725421	No	1
11.5167	-0.22068	0.00071603	0.990618	1351656	6.13087	0.0767221	No	1
11.5333	-0.233396	0.00075729	0.989853	1322097	6.12126	0.0825377	No	1
11.55	-0.255726	0.000829741	0.989042	1293146	6.11165	0.0861508	No	1
11.5667	-0.255472	0.000828917	0.988193	1264793	6.10202	0.0903178	No	1
11.5833	-0.281158	0.00091226	0.987286	1237025	6.09238	0.0977037	No	1
11.6	-0.30013	0.000973819	0.98632	1209831	6.08272	0.102481	No	1
11.6167	-0.310405	0.00100716	0.9853	1183199	6.07306	0.108497	No	1
11.6333	-0.336854	0.00109298	0.984212	1157118	6.06338	0.116283	No	1
11.65	-0.35781	0.00116097	0.983058	1131576	6.05368	0.121827	No	1
11.6667	-0.370984	0.00120372	0.981843	1106564	6.04398	0.128474	No	1
11.6833	-0.398654	0.00129349	0.980567	1082071	6.03426	0.134109	No	1
11.7	-0.405877	0.00131693	0.979243	1058087	6.02452	0.137949	No	1
11.7167	-0.422866	0.00137205	0.977871	1034600	6.01477	0.14345	No	1
11.7333	-0.44016	0.00142817	0.976437	1011603	6.00501	0.150403	No	1
11.75	-0.465998	0.001512	0.974933	989085	5.99523	0.157107	No	1
11.7667	-0.481919	0.00156366	0.973377	967036	5.98544	0.160835	No	1
11.7833	-0.489905	0.00158957	0.971775	945448	5.97564	0.165838	No	1
11.8	-0.513608	0.00166648	0.970099	924311	5.96582	0.175508	No	1
11.8167	-0.549975	0.00178448	0.968328	903617	5.95598	0.184672	No	1
11.8333	-0.570778	0.00185198	0.966474	883357	5.94614	0.191875	No	1
11.85	-0.595396	0.00193185	0.964553	863523	5.93627	0.197752	No	1
11.8667	-0.608265	0.00197361	0.962575	844105	5.9264	0.202836	No	1
11.8833	-0.628153	0.00203814	0.960528	825097	5.91651	0.211003	No	1
11.9	-0.659943	0.00214129	0.958413	806490	5.9066	0.216027	No	1
11.9167	-0.660757	0.00214393	0.956253	788276	5.89668	0.219416	No	1
11.9333	-0.682629	0.00221489	0.954048	770447	5.88674	0.224412	No	1
11.95	-0.693361	0.00224972	0.951782	752997	5.87679	0.23096	No	1
11.9667	-0.724846	0.00235187	0.949436	735917	5.86683	0.23997	No	1
11.9833	-0.750837	0.00243621	0.947015	719201	5.85685	0.245313	No	1
12	-0.759891	0.00246558	0.944531	702841	5.84686	0.251828	No	1
12.0167	-0.793207	0.00257368	0.941944	686830	5.83685	0.265071	No	1
12.0333	-0.843917	0.00273822	0.939228	671161	5.82683	0.276969	No	1
12.05	-0.869146	0.00282008	0.936421	655829	5.81679	0.282355	No	1
12.0667	-0.879726	0.00285441	0.933568	640825	5.80674	0.285366	No	1
12.0833	-0.890306	0.00288873	0.930664	626145	5.79667	0.291785	No	1
12.1	-0.922096	0.00299188	0.927675	611781	5.7866	0.301304	No	1
12.1167	-0.952054	0.00308909	0.924592	597726	5.7765	0.309476	No	1
12.1333	-0.975604	0.0031655	0.921427	583976	5.76639	0.316845	No	1
12.15	-1.00068	0.00324686	0.918179	570524	5.75627	0.324929	No	1
12.1667	-1.02881	0.00333812	0.914829	557364	5.74614	0.336191	No	1
12.1833	-1.07387	0.00348434	0.911356	544491	5.73599	0.348254	No	1
12.2	-1.10719	0.00359244	0.907778	531898	5.72583	0.355982	No	1
12.2167	-1.12524	0.00365103	0.904117	519580	5.71565	0.363474	No	1
12.2333	-1.15719	0.00375467	0.900363	507532	5.70546	0.37333	No	1
12.25	-1.1902	0.00386178	0.896507	495748	5.69526	0.382559	No	1
12.2667	-1.21833	0.00395304	0.892563	484223	5.68505	0.389712	No	1
12.2833	-1.23837	0.00401807	0.888539	472952	5.67482	0.397167	No	1
12.3	-1.26848	0.00411577	0.884422	461930	5.66458	0.406709	No	1
12.3167	-1.30179	0.00422386	0.880196	451151	5.65432	0.417535	No	1
12.3333	-1.34014	0.0043483	0.875871	440611	5.64406	0.425042	No	1
12.35	-1.35255	0.00438857	0.871471	430305	5.63378	0.431142	No	1
12.3667	-1.38206	0.00448429	0.866988	420229	5.62349	0.440142	No	1
12.3833	-1.41293	0.00458447	0.862404	410377	5.61318	0.449632	No	1
12.4	-1.44563	0.00469058	0.857711	400745	5.60287	0.460283	No	1
12.4167	-1.48399	0.00481502	0.85291	391328	5.59254	0.469554	No	1
12.4333	-1.50799	0.00489292	0.848016	382123	5.5822	0.477185	No	1
12.45	-1.53597	0.00498368	0.843049	373124	5.57185	0.482729	No	1
12.4667	-1.5467	0.00501851	0.838021	364328	5.56149	0.487961	No	1
12.4833	-1.57269	0.00510284	0.832924	355731	5.55112	0.494812	No	1
12.5	-1.5938	0.00517133	0.827744	347328	5.54074	0.503041	No	1
12.5167	-1.62864	0.00528438	0.822478	339115	5.53035	0.510358	No	1
12.5333	-1.64395	0.00533406	0.817141	331088	5.51994	0.515627	No	1
12.55	-1.66567	0.00540453	0.811732	323244	5.50953	0.523272	No	1
12.5667	-1.69624	0.00550371	0.806247	315579	5.49911	0.529252	No	1
12.5833	-1.70728	0.00553953	0.80069	308088	5.48867	0.536157	No	1
12.6	-1.7438	0.00565802	0.795036	300769	5.47823	0.546709	No	1
12.6167	-1.77833	0.00577008	0.789284	293617	5.46778	0.554012	No	1
12.6333	-1.79395	0.00582074	0.783448	286630	5.45732	0.561788	No	1
12.65	-1.83154	0.00594271	0.777519	279803	5.44685	0.571005	No	1
12.6667	-1.85646	0.00602357	0.771501	273134	5.43638	0.577742	No	1
12.6833	-1.87803	0.00609355	0.765408	266618	5.42589	0.584388	No	1
12.7	-1.90234	0.00617243	0.759248	260253	5.4154	0.589599	No	1
12.7167	-1.9146	0.00621221	0.753046	254036	5.4049	0.591731	No	1
12.7333	-1.91892	0.00622624	0.746818	247963	5.39439	0.593427	No	1
12.75	-1.92828	0.00625661	0.740568	242030	5.38387	0.595254	No	1
12.7667	-1.93337	0.00627311	0.734286	236237	5.37335	0.598761	No	1
12.7833	-1.95356	0.00633863	0.727946	230578	5.36282	0.605474	No	1
12.8	-1.9794	0.00642247	0.721524	225051	5.35228	0.613602	No	1
12.8167	-2.00875	0.00651769	0.715017	219654	5.34174	0.62068	No	1
12.8333	-2.02772	0.00657925	0.708447	214383	5.33119	0.625046	No	1
12.85	-2.03937	0.00661705	0.701836	209236	5.32064	0.627901	No	1
12.8667	-2.04842	0.00664642	0.695184	204210	5.31008	0.631986	No	1
12.8833	-2.06801	0.00670996	0.688487	199303	5.29951	0.635897	No	1
12.9	-2.07584	0.00673538	0.681751	194511	5.28894	0.638675	No	1
12.9167	-2.08795	0.00677466	0.67499	189832	5.27837	0.64011	No	1
12.9333	-2.08693	0.00677136	0.668214	185264	5.26779	0.641117	No	1
12.95	-2.09614	0.00680123	0.66141	180805	5.25721	0.644899	No	1
12.9667	-2.11312	0.00685635	0.654568	176451	5.24662	0.64769	No	1
12.9833	-2.11577	0.00686494	0.647701	172201	5.23604	0.64933	No	1
13	-2.12513	0.00689531	0.640813	168052	5.22544	0.651266	No	1
13.0167	-2.12961	0.00690983	0.6339	164002	5.21485	0.653756	No	1
13.0333	-2.14247	0.00695159	0.626961	160048	5.20425	0.65575	No	1
13.05	-2.14359	0.00695522	0.620009	156189	5.19365	0.655987	No	1
13.0667	-2.14487	0.00695935	0.613041	152423	5.18305	0.658599	No	1
13.0833	-2.1614	0.00701298	0.606053	148746	5.17245	0.659478	No	1
13.1	-2.15122	0.00697998	0.599072	145158	5.16184	0.657179	No	1
13.1167	-2.14685	0.00696579	0.592104	141656	5.15123	0.656836	No	1
13.1333	-2.14934	0.00697388	0.585138	138239	5.14063	0.656721	No	1
13.15	-2.14634	0.00696414	0.578184	134903	5.13002	0.654478	No	1
13.1667	-2.1348	0.00692668	0.571258	131649	5.11942	0.651507	No	1
13.1833	-2.12692	0.0069011	0.564368	128472	5.10881	0.647598	No	1
13.2	-2.10911	0.00684334	0.557515	125373	5.0982	0.64471	No	1
13.2167	-2.10779	0.00683905	0.550673	122348	5.0876	0.645503	No	1
13.2333	-2.11395	0.00685902	0.543839	119397	5.07699	0.643397	No	1
13.25	-2.09355	0.00679285	0.537038	116517	5.06639	0.639326	No	1
13.2667	-2.08674	0.00677074	0.530269	113707	5.05579	0.637722	No	1
13.2833	-2.08236	0.00675655	0.52353	110965	5.04519	0.633777	No	1
13.3	-2.06014	0.00668443	0.516831	108290	5.03459	0.630386	No	1
13.3167	-2.05927	0.00668162	0.510154	105681	5.024	0.630117	No	1
13.3333	-2.05734	0.00667536	0.503485	103134	5.0134	0.629002	No	1
13.35	-2.05083	0.00665423	0.496844	100650	5.00281	0.625309	No	1
13.3667	-2.03196	0.00659301	0.490231	98226	4.99223	0.624133	No	1
13.3833	-2.04178	0.00662486	0.483643	95862	4.98165	0.621126	No	1
13.4	-2.01085	0.00652452	0.477095	93555	4.97107	0.616941	No	1
13.4167	-2.01289	0.00653113	0.47058	91305	4.96049	0.615344	No	1
13.4333	-1.99875	0.00648525	0.464108	89110	4.94993	0.609267	No	1
13.45	-1.97149	0.00639679	0.457693	86968	4.93936	0.605192	No	1
13.4667	-1.97032	0.006393	0.451305	84879	4.9288	0.604786	No	1
13.4833	-1.96686	0.00638178	0.444942	82842	4.91825	0.601208	No	1
13.5	-1.94494	0.00631065	0.438629	80854	4.9077	0.595764	No	1
13.5167	-1.92927	0.00625983	0.432375	78915	4.89716	0.59073	No	1
13.5333	-1.90995	0.00619712	0.426179	77024	4.88663	0.585587	No	1
13.55	-1.89352	0.00614381	0.420031	75179	4.8761	0.582218	No	1
13.5667	-1.88564	0.00611823	0.413915	73379	4.86557	0.580294	No	1
13.5833	-1.87852	0.00609513	0.407838	71624	4.85506	0.575605	No	1
13.6	-1.85263	0.00601113	0.401824	69912	4.84455	0.569064	No	1
13.6167	-1.83345	0.00594892	0.395871	68242	4.83405	0.565004	No	1
13.6333	-1.82359	0.0059169	0.389952	66613	4.82356	0.56324	No	1
13.65	-1.81921	0.00590271	0.38407	65025	4.81308	0.559032	No	1
13.6667	-1.79348	0.00581921	0.378244	63475	4.8026	0.553273	No	1
13.6833	-1.77903	0.00577234	0.372483	61964	4.79214	0.547659	No	1
13.7	-1.75421	0.00569181	0.366776	60489	4.78168	0.543825	No	1
13.7167	-1.75121	0.00568207	0.361094	59052	4.77123	0.544001	No	1
13.7333	-1.75218	0.00568521	0.355437	57649	4.76079	0.539899	No	1
13.75	-1.72156	0.00558586	0.349837	56282	4.75037	0.534212	No	1
13.7667	-1.7123	0.00555583	0.344275	54948	4.73995	0.533469	No	1
13.7833	-1.71342	0.00555946	0.338743	53646	4.72954	0.529574	No	1
13.8	-1.68387	0.00546358	0.333287	52377	4.71914	0.520016	No	1
13.8167	-1.64868	0.00534938	0.327921	51140	4.70876	0.51324	No	1
13.8333	-1.63698	0.00531142	0.322621	49932	4.69838	0.508369	No	1
13.85	-1.61399	0.00523683	0.317388	48755	4.68802	0.501541	No	1
13.8667	-1.58978	0.00515828	0.312227	47606	4.67766	0.495593	No	1
13.8833	-1.57243	0.005102	0.307128	46486	4.66732	0.490624	No	1
13.9	-1.55448	0.00504375	0.302092	45394	4.657	0.484384	No	1
13.9167	-1.52905	0.00496124	0.297138	44328	4.64668	0.476172	No	1
13.9333	-1.49858	0.00486238	0.292261	43289	4.63638	0.4704	No	1
13.95	-1.48872	0.00483037	0.287448	42275	4.62608	0.464889	No	1
13.9667	-1.45993	0.00473696	0.282692	41286	4.6158	0.460674	No	1
13.9833	-1.4583	0.00473168	0.277978	40322	4.60554	0.457567	No	1
14	-1.43653	0.00466105	0.273305	39381	4.59529	0.45405	No	1
14.0167	-1.43231	0.00464736	0.268676	38464	4.58505	0.450266	No	1
14.0333	-1.40887	0.00457128	0.264108	37569	4.57483	0.443236	No	1
14.05	-1.3842	0.00449124	0.259613	36696	4.56462	0.437164	No	1
14.0667	-1.36685	0.00443497	0.255185	35844	4.55442	0.431254	No	1
14.0833	-1.34325	0.00435839	0.250827	35013	4.54423	0.424678	No	1
14.1	-1.32179	0.00428875	0.246539	34203	4.53406	0.418627	No	1
14.1167	-1.30155	0.00422307	0.242332	33413	4.52392	0.410126	No	1
14.1333	-1.26483	0.00410392	0.238207	32642	4.51378	0.40339	No	1
14.15	-1.25572	0.00407438	0.234131	31889	4.50364	0.401849	No	1
14.1667	-1.2515	0.00406069	0.230089	31156	4.49354	0.397885	No	1
14.1833	-1.22729	0.00398213	0.226101	30440	4.48344	0.392124	No	1
14.2	-1.21193	0.0039323	0.222167	29742	4.47337	0.388464	No	1
14.2167	-1.20084	0.00389632	0.218276	29060	4.4633	0.384921	No	1
14.2333	-1.18625	0.00384896	0.21444	28396	4.45326	0.378587	No	1
14.25	-1.15792	0.00375704	0.210683	27747	4.44322	0.370435	No	1
14.2667	-1.13218	0.00367353	0.207012	27115	4.43321	0.36251	No	1
14.2833	-1.10538	0.00358656	0.203394	26497	4.4232	0.360902	No	1
14.3	-1.1187	0.0036298	0.199806	25895	4.41322	0.357755	No	1
14.3167	-1.08244	0.00351214	0.196284	25307	4.40324	0.349012	No	1
14.3333	-1.06143	0.00344398	0.192831	24734	4.39329	0.344872	No	1
14.35	-1.05355	0.0034184	0.189423	24175	4.38337	0.341095	No	1
14.3667	-1.03483	0.00335767	0.186068	23629	4.37345	0.335261	No	1
14.3833	-1.01444	0.0032915	0.182786	23096	4.36354	0.327485	No	1
14.4	-0.983971	0.00319265	0.17958	22576	4.35365	0.321162	No	1
14.4167	-0.972579	0.00315568	0.176439	22069	4.34378	0.315297	No	1
14.4333	-0.945012	0.00306624	0.17337	21574	4.33393	0.307554	No	1
14.45	-0.922328	0.00299263	0.170369	21091	4.3241	0.302606	No	1
14.4667	-0.911851	0.00295864	0.167419	20619	4.31427	0.29807	No	1
14.4833	-0.89176	0.00289345	0.164515	20159	4.30447	0.294455	No	1
14.5	-0.886929	0.00287778	0.161645	19710	4.29469	0.292169	No	1
14.5167	-0.874926	0.00283883	0.158808	19271	4.2849	0.288506	No	1
14.5333	-0.861855	0.00279642	0.156005	18843	4.27515	0.286254	No	1
14.55	-0.858397	0.0027852	0.153232	18425	4.26541	0.283332	No	1
14.5667	-0.841358	0.00272992	0.150503	18018	4.25571	0.278361	No	1
14.5833	-0.825693	0.00267909	0.147825	17620	4.24601	0.273501	No	1
14.6	-0.809418	0.00262628	0.145209	17231	4.23631	0.266756	No	1
14.6167	-0.782614	0.00253931	0.142659	16852	4.22665	0.260628	No	1
14.6333	-0.770153	0.00249888	0.140169	16481	4.21698	0.255298	No	1
14.65	-0.748232	0.00242775	0.137724	16120	4.20737	0.252287	No	1
14.6667	-0.749656	0.00243237	0.13531	15766	4.19772	0.249445	No	1
14.6833	-0.728803	0.00236471	0.132933	15422	4.18814	0.245765	No	1
14.7	-0.725345	0.00235349	0.130574	15085	4.17855	0.246257	No	1
14.7167	-0.729211	0.00236604	0.128214	14756	4.16897	0.247006	No	1
14.7333	-0.727279	0.00235977	0.125862	14435	4.15942	0.245423	No	1
14.75	-0.717412	0.00232775	0.123536	14122	4.1499	0.24243	No	1
14.7667	-0.70724	0.00229475	0.121263	13815	4.14035	0.234925	No	1
14.7833	-0.670976	0.00217708	0.119068	13516	4.13085	0.226922	No	1
14.8	-0.658057	0.00213517	0.116925	13224	4.12136	0.224709	No	1
14.8167	-0.65582	0.00212791	0.114793	12939	4.1119	0.225491	No	1
14.8333	-0.660449	0.00214293	0.112676	12660	4.10243	0.222136	No	1
14.85	-0.634103	0.00205744	0.110598	12388	4.093	0.218032	No	1
14.8667	-0.634459	0.0020586	0.108557	12122	4.08357	0.21504	No	1
14.8833	-0.614674	0.0019944	0.106556	11862	4.07416	0.210114	No	1
14.9	-0.603892	0.00195942	0.104604	11608	4.06476	0.205274	No	1
14.9167	-0.584717	0.0018972	0.102695	11360	4.05538	0.201681	No	1
14.9333	-0.581259	0.00188598	0.100819	11118	4.04603	0.19905	No	1
14.95	-0.56773	0.00184209	0.0989683	10881	4.03667	0.196593	No	1
14.9667	-0.56534	0.00183433	0.0971458	10649	4.02731	0.193725	No	1
14.9833	-0.549523	0.00178301	0.0953474	10423	4.01799	0.191986	No	1
15	-0.553694	0.00179654	0.0935623	10202	4.00869	0.19146	No	1
15.0167	-0.544895	0.001768	0.0917847	9986	3.99939	0.190901	No	1
15.0333	-0.548914	0.00178104	0.0900257	9775	3.99012	0.188015	No	1
15.05	-0.52684	0.00170941	0.088308	9568	3.98082	0.182524	No	1
15.0667	-0.516058	0.00167443	0.0866105	9366	3.97155	0.184153	No	1
15.0833	-0.534725	0.001735	0.0848958	9169	3.96232	0.186745	No	1
15.1	-0.529436	0.00171784	0.0831849	8976	3.95308	0.183787	No	1
15.1167	-0.516517	0.00167592	0.0815155	8788	3.94389	0.178238	No	1
15.1333	-0.49658	0.00161123	0.0799037	8603	3.93465	0.171728	No	1
15.15	-0.478321	0.00155198	0.0783432	8423	3.92547	0.167511	No	1
15.1667	-0.471506	0.00152987	0.0768201	8246	3.91624	0.163978	No	1
15.1833	-0.457214	0.0014835	0.0753301	8074	3.90709	0.1607	No	1
15.2	-0.451925	0.00146634	0.0738652	7905	3.8979	0.158839	No	1
15.2167	-0.44572	0.00144621	0.0724247	7740	3.88874	0.155698	No	1
15.2333	-0.433259	0.00140578	0.0710126	7579	3.87961	0.152976	No	1
15.25	-0.429496	0.00139356	0.0696188	7421	3.87046	0.151975	No	1
15.2667	-0.426801	0.00138482	0.06823	7267	3.86136	0.152186	No	1
15.2833	-0.429904	0.00139489	0.0668451	7116	3.85224	0.151385	No	1
15.3	-0.421563	0.00136783	0.0654779	6968	3.84311	0.14854	No	1
15.3167	-0.413222	0.00134076	0.0641433	6823	3.83398	0.14446	No	1
15.3333	-0.398015	0.00129142	0.0628342	6682	3.82491	0.143168	No	1
15.35	-0.40539	0.00131535	0.061524	6543	3.81578	0.144914	No	1
15.3667	-0.407273	0.00132146	0.0602184	6408	3.80672	0.142325	No	1
15.3833	-0.390387	0.00126667	0.0589408	6275	3.79761	0.138908	No	1
15.4	-0.387692	0.00125793	0.0577016	6145	3.78852	0.134035	No	1
15.4167	-0.362719	0.0011769	0.0565032	6018	3.77945	0.130022	No	1
15.4333	-0.364906	0.00118399	0.0553041	5894	3.77041	0.134318	No	1
15.45	-0.386473	0.00125397	0.0540829	5772	3.76133	0.13498	No	1
15.4667	-0.368366	0.00119522	0.0528839	5653	3.75228	0.129492	No	1
15.4833	-0.3556	0.0011538	0.0517342	5536	3.7432	0.124186	No	1
15.5	-0.338562	0.00109852	0.0506019	5422	3.73416	0.125667	No	1
15.5167	-0.36379	0.00118037	0.0494498	5310	3.72509	0.128587	No	1
15.5333	-0.354839	0.00115133	0.0482907	5200	3.716	0.127212	No	1
15.55	-0.356111	0.00115546	0.047143	5093	3.70697	0.126075	No	1
15.5667	-0.348533	0.00113087	0.0460159	4987	3.69784	0.122635	No	1
15.5833	-0.336988	0.00109341	0.0449159	4884	3.68878	0.120061	No	1
15.6	-0.334293	0.00108466	0.0438359	4783	3.6797	0.118135	No	1
15.6167	-0.32641	0.00105909	0.0427803	4685	3.67071	0.114618	No	1
15.6333	-0.314864	0.00102163	0.0417549	4588	3.66162	0.111396	No	1
15.65	-0.30866	0.00100149	0.0407591	4493	3.65254	0.107978	No	1
15.6667	-0.296046	0.000960568	0.0397922	4400	3.64345	0.104908	No	1
15.6833	-0.291825	0.000946872	0.0388455	4309	3.63438	0.103385	No	1
15.7	-0.287909	0.000934166	0.0379098	4219	3.62521	0.102346	No	1
15.7167	-0.286435	0.000929382	0.0369831	4132	3.61616	0.101245	No	1
15.7333	-0.282214	0.000915686	0.036071	4046	3.60703	0.0989695	No	1
15.75	-0.274178	0.000889613	0.0351688	3962	3.59791	0.0988595	No	1
15.7667	-0.282164	0.000915525	0.0342635	3880	3.58883	0.0994451	No	1
15.7833	-0.278096	0.000902324	0.0333672	3799	3.57967	0.0966659	No	1
15.8	-0.267161	0.000866844	0.032484	3719	3.57043	0.0963163	No	1
15.8167	-0.276825	0.000898202	0.0316072	3642	3.56134	0.0950413	No	1
15.8333	-0.260702	0.000845889	0.0307452	3566	3.55218	0.092791	No	1
15.85	-0.264874	0.000859423	0.0299016	3491	3.54295	0.0907808	No	1
15.8667	-0.250124	0.000811566	0.0290789	3418	3.53377	0.0879357	No	1
15.8833	-0.249565	0.000809753	0.0282642	3346	3.52453	0.0887371	No	1
15.9	-0.255568	0.000829228	0.0274476	3276	3.51534	0.0880283	No	1
15.9167	-0.246464	0.000799689	0.0266465	3206	3.50596	0.0850702	No	1
15.9333	-0.239649	0.000777577	0.0258727	3139	3.49679	0.0817687	No	1
15.95	-0.228561	0.000741602	0.0251367	3072	3.48742	0.0766111	No	1
15.9667	-0.211065	0.000684833	0.0244246	3007	3.47813	0.0762702	No	1
15.9833	-0.227596	0.00073847	0.0237021	2943	3.46879	0.0784899	No	1
16	-0.224901	0.000729725	0.0229702	2880	3.45939	0.0778917	No	1
16.0167	-0.225257	0.000730882	0.0222379	2819	3.4501	0.0782095	No	1
16.0333	-0.227903	0.000739466	0.0215096	2758	3.44059	0.0765995	No	1
16.05	-0.217121	0.000704481	0.0207932	2699	3.4312	0.0752777	No	1
16.0667	-0.221444	0.00071851	0.0200915	2641	3.42177	0.0730669	No	1
16.0833	-0.205474	0.000666692	0.0194108	2584	3.41229	0.0704178	No	1
16.1	-0.207204	0.000672305	0.0187439	2528	3.40278	0.0697233	No	1
16.1167	-0.202678	0.000657619	0.0180849	2473	3.39322	0.0683263	No	1
16.1333	-0.200288	0.000649864	0.0174378	2419	3.38364	0.0667754	No	1
16.15	-0.194846	0.000632208	0.0167956	2366	3.37401	0.0668459	No	1
16.1667	-0.202069	0.000655644	0.0161582	2314	3.36436	0.0653199	No	1
16.1833	-0.187167	0.000607292	0.0155363	2263	3.35468	0.0631845	No	1
16.2	-0.190728	0.000618846	0.0149193	2213	3.34498	0.063802	No	1
16.2167	-0.192305	0.000623964	0.0142969	2164	3.33526	0.0638243	No	1
16.2333	-0.192357	0.00062413	0.0136801	2116	3.32552	0.0621487	No	1
16.25	-0.183711	0.000596077	0.0130905	2068	3.31555	0.0577916	No	1
16.2667	-0.167435	0.000543269	0.0125327	2022	3.30578	0.0552136	No	1
16.2833	-0.16947	0.000549872	0.0119849	1976	3.29579	0.0552646	No	1
16.3	-0.169216	0.000549048	0.0114378	1931	3.28578	0.0546138	No	1
16.3167	-0.166979	0.000541789	0.0109103	1887	3.27577	0.0508279	No	1
16.3333	-0.147347	0.000478088	0.0104065	1844	3.26576	0.0494276	No	1
16.35	-0.159758	0.000518358	0.00989978	1802	3.25575	0.0509178	No	1
16.3667	-0.158131	0.000513079	0.00939203	1760	3.24551	0.0491519	No	1
16.3833	-0.150247	0.000487501	0.00890736	1719	3.23528	0.0458964	No	1
16.4	-0.13916	0.000451526	0.00844145	1679	3.22505	0.0450027	No	1
16.4167	-0.146078	0.000473972	0.00796252	1640	3.21484	0.0479434	No	1
16.4333	-0.159404	0.000517212	0.00747896	1601	3.20439	0.0454155	No	1
16.45	-0.131532	0.000426776	0.00703136	1563	3.19396	0.0405395	No	1
16.4667	-0.1296	0.000420507	0.0066045	1526	3.18355	0.0409646	No	1
16.4833	-0.135755	0.000440478	0.00616324	1489	3.17289	0.0428076	No	1
16.5	-0.143131	0.000464409	0.0057092	1453	3.16227	0.0429001	No	1
16.5167	-0.137994	0.000447743	0.00526403	1418	3.15168	0.0406474	No	1
16.5333	-0.129958	0.00042167	0.00483267	1384	3.14114	0.039819	No	1
16.55	-0.13413	0.000435204	0.00440324	1350	3.13033	0.039795	No	1
16.5667	-0.131434	0.000426459	0.00397897	1316	3.11926	0.0383793	No	1
16.5833	-0.126298	0.000409793	0.0035575	1284	3.10857	0.0387819	No	1
16.6	-0.13581	0.000440656	0.00313425	1252	3.0976	0.0382089	No	1
16.6167	-0.124112	0.0004027	0.00272667	1220	3.08636	0.0354539	No	1
16.6333	-0.11867	0.000385044	0.00234132	1189	3.07518	0.033726	No	1
16.65	-0.113839	0.000369367	0.00195766	1159	3.06408	0.0346761	No	1
16.6667	-0.12686	0.000411617	0.00155589	1129	3.05269	0.0364592	No	1
16.6833	-0.12798	0.00041525	0.00116534	1100	3.04139	0.0322291	No	1
16.7	-0.0988869	0.000320854	0.000819526	1071	3.02979	0.0281613	No	1
16.7167	-0.100769	0.000326962	0.000493094	1043	3.01828	0.0284206	No	1
16.7333	-0.102194	0.000331584	0.000164269	1016	3.00689	0.0281627	No	1
