# Supplementary material for: Descriptive study and evaluation of shrink hoods with recycled content for regulatory compliance
Source: Research Square preprint supplement (doi:10.21203/rs.3.rs-6261320/v1), 2025-06-25
Supplement: Supplementary file 7 [file c70494aaf11f8fe3abd1a594.xlsx]

## Sheet: Sample Details
Administrative Information
Export date	10 December 2024 09:43:12
Culture name	en-GB
Decimal separator	.
Workspace name	November 2024
Workspace path	C:\ProgramData\Agilent Technologies\GPC\Workspaces\2024\November 2024\
File name	ICF_04_12_2024-0010.sample
Creation date	09 December 2024 12:08:36
Created by	OBPC
Comments	Collected by Agilent GPC/SEC Software Version 2.1.9.34851
Software version	Agilent SEC Software - 2.1.9.34851
Sample Information
Sample name	G
Information
Sample type	Sample
Injection date	09 December 2024
Vial number	None
Injection number	1
Injection volume (µL)	200
Concentration (mg/mL)	1
dn/dc (mL/g)	0.1
UV extinction coefficient [(mg/mL)-¹][cm-¹]	1
Mp (g/mol)	100000
IV (dL/g)	0.5
Mark-Houwink K ((10e-5) dL/g)	14.1
Mark-Houwink Alpha	0.7
Analysed	Yes
Sample Instrument Conditions
Eluent
Eluent refractive index	1
Set flow rate (mL/min)	1
LS wavelength (nm)	650
Laser power (%)	0
Set detector temperature (°C)	0
Actual detector temperature (°C)	0
Actual flow rate (mL/min)	0
Column information
Data origin	Collected by Agilent GPC/SEC Software Version 2.1.9.34851
Instrument name	Agilent DataStream
Sample Collection Parameters
Collected by	OBPC
Number of channels	1
Run length (mins)	30.0167
Delay time (secs)	0
Sampling interval (secs)	1
Number of data points	1801
Sample DLS Parameters
Eluent refractive index	1
Eluent viscosity (P)	0.0089
DLS correlator run time (secs)	5
DLS Clip Time (µs)	100
DLS R²	0.4
Sample Channel Information
Channel ID	Detector type	Detector name	Detector units	Channel Information
1	RI	Trace0	mV

## Sheet: Raw Data
Sample Collection Parameters
Collected by	OBPC
Number of channels	1
Run length (mins)	30.0167
Delay time (secs)	0
Sampling interval (secs)	1
Number of data points	1801
Sample DLS Parameters
Eluent refractive index	1
Eluent viscosity (P)	0.0089
DLS correlator run time (secs)	5
DLS Clip Time (µs)	100
DLS R²	0.4
Sample Channel Information
Channel ID	Detector type	Detector name	Detector units	Channel Information
1	RI	Trace0	mV
Raw Data
RT (mins)	Response Trace 1
0	-2.16188
0.0166667	-2.17857
0.0333333	-2.19505
0.05	-2.19353
0.0666667	-2.17644
0.0833333	-2.18285
0.1	-2.18193
0.116667	-2.18956
0.133333	-2.16713
0.15	-2.16972
0.166667	-2.1685
0.183333	-2.16682
0.2	-2.16637
0.216667	-2.17354
0.233333	-2.1862
0.25	-2.18239
0.266667	-2.15599
0.283333	-2.17201
0.3	-2.16545
0.316667	-2.17522
0.333333	-2.19124
0.35	-2.19139
0.366667	-2.18025
0.383333	-2.19292
0.4	-2.19704
0.416667	-2.20848
0.433333	-2.1888
0.45	-2.18605
0.466667	-2.18864
0.483333	-2.18117
0.5	-2.19551
0.516667	-2.21184
0.533333	-2.22755
0.55	-2.23366
0.566667	-2.22511
0.583333	-2.20436
0.6	-2.21611
0.616667	-2.20894
0.633333	-2.22115
0.65	-2.23808
0.666667	-2.24449
0.683333	-2.2715
0.7	-2.2802
0.716667	-2.26814
0.733333	-2.26189
0.75	-2.26021
0.766667	-2.25853
0.783333	-2.24648
0.8	-2.23915
0.816667	-2.24068
0.833333	-2.25975
0.85	-2.23747
0.866667	-2.22847
0.883333	-2.23869
0.9	-2.23625
0.916667	-2.24312
0.933333	-2.23564
0.95	-2.23305
0.966667	-2.23625
0.983333	-2.24083
1	-2.24144
1.01667	-2.23274
1.03333	-2.2303
1.05	-2.21718
1.06667	-2.22328
1.08333	-2.22008
1.1	-2.2274
1.11667	-2.24037
1.13333	-2.23473
1.15	-2.22374
1.16667	-2.23305
1.18333	-2.2329
1.2	-2.23732
1.21667	-2.23366
1.23333	-2.25136
1.25	-2.24388
1.26667	-2.26082
1.28333	-2.25761
1.3	-2.27379
1.31667	-2.2628
1.33333	-2.27196
1.35	-2.27074
1.36667	-2.28035
1.38333	-2.25761
1.4	-2.2744
1.41667	-2.27531
1.43333	-2.28066
1.45	-2.27272
1.46667	-2.27287
1.48333	-2.2773
1.5	-2.26189
1.51667	-2.26707
1.53333	-2.27425
1.55	-2.2683
1.56667	-2.26021
1.58333	-2.26418
1.6	-2.27165
1.61667	-2.26646
1.63333	-2.28401
1.65	-2.28569
1.66667	-2.28111
1.68333	-2.28752
1.7	-2.28035
1.71667	-2.2831
1.73333	-2.29134
1.75	-2.28188
1.76667	-2.28874
1.78333	-2.28279
1.8	-2.29118
1.81667	-2.28737
1.83333	-2.28905
1.85	-2.30476
1.86667	-2.29424
1.88333	-2.30705
1.9	-2.28569
1.91667	-2.27943
1.93333	-2.28233
1.95	-2.30629
1.96667	-2.30659
1.98333	-2.31377
2	-2.31361
2.01667	-2.29256
2.03333	-2.28127
2.05	-2.27287
2.06667	-2.2863
2.08333	-2.28645
2.1	-2.28432
2.11667	-2.27913
2.13333	-2.27806
2.15	-2.28951
2.16667	-2.27821
2.18333	-2.28218
2.2	-2.28447
2.21667	-2.28111
2.23333	-2.29118
2.25	-2.29836
2.26667	-2.30186
2.28333	-2.29469
2.3	-2.29057
2.31667	-2.28874
2.33333	-2.29088
2.35	-2.29774
2.36667	-2.27882
2.38333	-2.2747
2.4	-2.27074
2.41667	-2.29057
2.43333	-2.28493
2.45	-2.29073
2.46667	-2.29164
2.48333	-2.28462
2.5	-2.27898
2.51667	-2.28706
2.53333	-2.28569
2.55	-2.26936
2.56667	-2.29347
2.58333	-2.29134
2.6	-2.30171
2.61667	-2.29057
2.63333	-2.286
2.65	-2.28615
2.66667	-2.26677
2.68333	-2.28172
2.7	-2.28096
2.71667	-2.30019
2.73333	-2.29988
2.75	-2.31834
2.76667	-2.30858
2.78333	-2.31255
2.8	-2.3217
2.81667	-2.30598
2.83333	-2.32216
2.85	-2.30614
2.86667	-2.29073
2.88333	-2.28416
2.9	-2.30736
2.91667	-2.30537
2.93333	-2.30522
2.95	-2.30965
2.96667	-2.31133
2.98333	-2.29942
3	-2.28432
3.01667	-2.28706
3.03333	-2.29378
3.05	-2.28218
3.06667	-2.28371
3.08333	-2.27242
3.1	-2.28691
3.11667	-2.28493
3.13333	-2.27684
3.15	-2.28447
3.16667	-2.29424
3.18333	-2.27287
3.2	-2.28554
3.21667	-2.286
3.23333	-2.28859
3.25	-2.29424
3.26667	-2.286
3.28333	-2.28828
3.3	-2.29607
3.31667	-2.29286
3.33333	-2.30217
3.35	-2.29012
3.36667	-2.28554
3.38333	-2.27837
3.4	-2.28645
3.41667	-2.29027
3.43333	-2.30019
3.45	-2.30156
3.46667	-2.29073
3.48333	-2.2863
3.5	-2.29408
3.51667	-2.29729
3.53333	-2.29515
3.55	-2.30049
3.56667	-2.31361
3.58333	-2.29805
3.6	-2.31972
3.61667	-2.31148
3.63333	-2.29439
3.65	-2.30339
3.66667	-2.30354
3.68333	-2.30492
3.7	-2.29118
3.71667	-2.28432
3.73333	-2.28554
3.75	-2.27776
3.76667	-2.28996
3.78333	-2.29103
3.8	-2.27104
3.81667	-2.2747
3.83333	-2.29103
3.85	-2.28615
3.86667	-2.27211
3.88333	-2.2805
3.9	-2.29973
3.91667	-2.29286
3.93333	-2.28279
3.95	-2.28325
3.96667	-2.27989
3.98333	-2.26646
4	-2.25212
4.01667	-2.26875
4.03333	-2.26509
4.05	-2.27745
4.06667	-2.27333
4.08333	-2.2744
4.1	-2.27821
4.11667	-2.27089
4.13333	-2.26814
4.15	-2.26555
4.16667	-2.27898
4.18333	-2.25853
4.2	-2.26891
4.21667	-2.2628
4.23333	-2.26067
4.25	-2.2567
4.26667	-2.25853
4.28333	-2.25975
4.3	-2.25731
4.31667	-2.26524
4.33333	-2.26799
4.35	-2.25639
4.36667	-2.26601
4.38333	-2.25761
4.4	-2.26372
4.41667	-2.25334
4.43333	-2.2654
4.45	-2.26906
4.46667	-2.27074
4.48333	-2.26906
4.5	-2.27974
4.51667	-2.27562
4.53333	-2.26295
4.55	-2.28386
4.56667	-2.29851
4.58333	-2.27684
4.6	-2.28371
4.61667	-2.27028
4.63333	-2.27577
4.65	-2.28569
4.66667	-2.29698
4.68333	-2.30629
4.7	-2.30629
4.71667	-2.30186
4.73333	-2.29469
4.75	-2.28279
4.76667	-2.29088
4.78333	-2.28554
4.8	-2.30721
4.81667	-2.32155
4.83333	-2.29607
4.85	-2.29301
4.86667	-2.3069
4.88333	-2.29988
4.9	-2.30324
4.91667	-2.29012
4.93333	-2.26875
4.95	-2.28111
4.96667	-2.29805
4.98333	-2.28584
5	-2.31483
5.01667	-2.28477
5.03333	-2.27303
5.05	-2.27745
5.06667	-2.2834
5.08333	-2.28523
5.1	-2.27379
5.11667	-2.2802
5.13333	-2.28874
5.15	-2.29652
5.16667	-2.29729
5.18333	-2.28951
5.2	-2.27501
5.21667	-2.27531
5.23333	-2.28493
5.25	-2.28859
5.26667	-2.27669
5.28333	-2.2831
5.3	-2.28355
5.31667	-2.295
5.33333	-2.30827
5.35	-2.30064
5.36667	-2.30339
5.38333	-2.30064
5.4	-2.29774
5.41667	-2.30034
5.43333	-2.28676
5.45	-2.30309
5.46667	-2.29546
5.48333	-2.29469
5.5	-2.30721
5.51667	-2.3008
5.53333	-2.304
5.55	-2.29988
5.56667	-2.28889
5.58333	-2.29103
5.6	-2.29469
5.61667	-2.29805
5.63333	-2.30324
5.65	-2.30858
5.66667	-2.32124
5.68333	-2.30782
5.7	-2.29225
5.71667	-2.3069
5.73333	-2.32399
5.75	-2.31239
5.76667	-2.31819
5.78333	-2.30095
5.8	-2.30843
5.81667	-2.31102
5.83333	-2.29607
5.85	-2.32079
5.86667	-2.31178
5.88333	-2.31834
5.9	-2.30705
5.91667	-2.32109
5.93333	-2.30095
5.95	-2.29301
5.96667	-2.30339
5.98333	-2.31163
6	-2.32368
6.01667	-2.30659
6.03333	-2.30278
6.05	-2.3037
6.06667	-2.31697
6.08333	-2.31728
6.1	-2.31972
6.11667	-2.32674
6.13333	-2.32262
6.15	-2.30583
6.16667	-2.30751
6.18333	-2.31209
6.2	-2.31834
6.21667	-2.31621
6.23333	-2.31834
6.25	-2.32307
6.26667	-2.31865
6.28333	-2.31804
6.3	-2.31361
6.31667	-2.32399
6.33333	-2.31865
6.35	-2.32765
6.36667	-2.32689
6.38333	-2.31606
6.4	-2.30324
6.41667	-2.30415
6.43333	-2.3307
6.45	-2.32857
6.46667	-2.30873
6.48333	-2.32765
6.5	-2.34856
6.51667	-2.33192
6.53333	-2.33421
6.55	-2.3362
6.56667	-2.34215
6.58333	-2.34383
6.6	-2.35664
6.61667	-2.35039
6.63333	-2.34444
6.65	-2.32368
6.66667	-2.34093
6.68333	-2.33894
6.7	-2.34657
6.71667	-2.33604
6.73333	-2.32521
6.75	-2.32918
6.76667	-2.33665
6.78333	-2.3243
6.8	-2.33269
6.81667	-2.34093
6.83333	-2.31911
6.85	-2.32689
6.86667	-2.32262
6.88333	-2.32475
6.9	-2.32689
6.91667	-2.32124
6.93333	-2.32567
6.95	-2.32842
6.96667	-2.34596
6.98333	-2.34962
7	-2.33269
7.01667	-2.33665
7.03333	-2.32689
7.05	-2.31819
7.06667	-2.31956
7.08333	-2.32445
7.1	-2.31453
7.11667	-2.32384
7.13333	-2.31895
7.15	-2.31636
7.16667	-2.33147
7.18333	-2.33559
7.2	-2.34337
7.21667	-2.34032
7.23333	-2.33345
7.25	-2.32643
7.26667	-2.33131
7.28333	-2.32048
7.3	-2.32262
7.31667	-2.3278
7.33333	-2.33086
7.35	-2.34001
7.36667	-2.33955
7.38333	-2.32552
7.4	-2.3278
7.41667	-2.34154
7.43333	-2.34886
7.45	-2.33879
7.46667	-2.35039
7.48333	-2.34566
7.5	-2.35771
7.51667	-2.33604
7.53333	-2.35024
7.55	-2.3568
7.56667	-2.34093
7.58333	-2.35237
7.6	-2.33101
7.61667	-2.34398
7.63333	-2.34947
7.65	-2.35466
7.66667	-2.3455
7.68333	-2.34215
7.7	-2.34703
7.71667	-2.35939
7.73333	-2.34886
7.75	-2.35481
7.76667	-2.34932
7.78333	-2.34337
7.8	-2.36321
7.81667	-2.34367
7.83333	-2.32536
7.85	-2.32368
7.86667	-2.34398
7.88333	-2.34474
7.9	-2.34642
7.91667	-2.34749
7.93333	-2.33208
7.95	-2.32567
7.96667	-2.33635
7.98333	-2.32811
8	-2.32491
8.01667	-2.31743
8.03333	-2.31209
8.05	-2.32704
8.06667	-2.31911
8.08333	-2.32842
8.1	-2.33269
8.11667	-2.30812
8.13333	-2.31346
8.15	-2.3455
8.16667	-2.34016
8.18333	-2.32735
8.2	-2.33055
8.21667	-2.32262
8.23333	-2.32155
8.25	-2.32216
8.26667	-2.31392
8.28333	-2.3275
8.3	-2.34352
8.31667	-2.32506
8.33333	-2.32094
8.35	-2.32704
8.36667	-2.33284
8.38333	-2.33482
8.4	-2.34459
8.41667	-2.33391
8.43333	-2.34337
8.45	-2.33406
8.46667	-2.34474
8.48333	-2.33208
8.5	-2.32033
8.51667	-2.31514
8.53333	-2.32796
8.55	-2.3304
8.56667	-2.33513
8.58333	-2.33299
8.6	-2.3246
8.61667	-2.34474
8.63333	-2.34367
8.65	-2.3542
8.66667	-2.33482
8.68333	-2.33635
8.7	-2.32491
8.71667	-2.34459
8.73333	-2.34688
8.75	-2.34795
8.76667	-2.35741
8.78333	-2.35344
8.8	-2.35207
8.81667	-2.3597
8.83333	-2.35512
8.85	-2.34917
8.86667	-2.35939
8.88333	-2.33727
8.9	-2.34016
8.91667	-2.32735
8.93333	-2.34566
8.95	-2.34947
8.96667	-2.33406
8.98333	-2.32689
9	-2.32979
9.01667	-2.34062
9.03333	-2.33406
9.05	-2.35603
9.06667	-2.34245
9.08333	-2.34306
9.1	-2.32582
9.11667	-2.32552
9.13333	-2.31895
9.15	-2.31789
9.16667	-2.30644
9.18333	-2.30125
9.2	-2.31224
9.21667	-2.30934
9.23333	-2.31209
9.25	-2.32002
9.26667	-2.32811
9.28333	-2.30736
9.3	-2.30248
9.31667	-2.30675
9.33333	-2.31743
9.35	-2.33986
9.36667	-2.32597
9.38333	-2.32521
9.4	-2.31621
9.41667	-2.3185
9.43333	-2.32536
9.45	-2.3275
9.46667	-2.3243
9.48333	-2.31728
9.5	-2.33574
9.51667	-2.33452
9.53333	-2.32491
9.55	-2.33376
9.56667	-2.33696
9.58333	-2.33345
9.6	-2.31926
9.61667	-2.32475
9.63333	-2.33284
9.65	-2.34566
9.66667	-2.34505
9.68333	-2.34688
9.7	-2.34215
9.71667	-2.3336
9.73333	-2.3394
9.75	-2.32567
9.76667	-2.33101
9.78333	-2.34383
9.8	-2.3362
9.81667	-2.33894
9.83333	-2.3333
9.85	-2.33849
9.86667	-2.34169
9.88333	-2.34627
9.9	-2.35085
9.91667	-2.35588
9.93333	-2.35619
9.95	-2.36259
9.96667	-2.35344
9.98333	-2.33498
10	-2.34978
10.0167	-2.34993
10.0333	-2.35558
10.05	-2.35756
10.0667	-2.35634
10.0833	-2.35786
10.1	-2.36992
10.1167	-2.3597
10.1333	-2.35802
10.15	-2.35985
10.1667	-2.35832
10.1833	-2.34383
10.2	-2.35252
10.2167	-2.35344
10.2333	-2.32857
10.25	-2.34566
10.2667	-2.3661
10.2833	-2.36137
10.3	-2.36351
10.3167	-2.37907
10.3333	-2.36122
10.35	-2.36137
10.3667	-2.36458
10.3833	-2.37007
10.4	-2.38808
10.4167	-2.38548
10.4333	-2.38304
10.45	-2.40181
10.4667	-2.38838
10.4833	-2.3925
10.5	-2.39464
10.5167	-2.41829
10.5333	-2.39998
10.55	-2.40334
10.5667	-2.38579
10.5833	-2.39876
10.6	-2.38609
10.6167	-2.40547
10.6333	-2.40669
10.65	-2.39952
10.6667	-2.38777
10.6833	-2.42073
10.7	-2.40913
10.7167	-2.39967
10.7333	-2.40425
10.75	-2.41402
10.7667	-2.42394
10.7833	-2.42424
10.8	-2.42577
10.8167	-2.43492
10.8333	-2.4305
10.85	-2.43156
10.8667	-2.44194
10.8833	-2.44499
10.9	-2.43462
10.9167	-2.45338
10.9333	-2.45827
10.95	-2.46422
10.9667	-2.45995
10.9833	-2.46117
11	-2.47063
11.0167	-2.48146
11.0333	-2.49794
11.05	-2.49596
11.0667	-2.51137
11.0833	-2.53181
11.1	-2.54448
11.1167	-2.54585
11.1333	-2.55791
11.15	-2.57973
11.1667	-2.57988
11.1833	-2.56889
11.2	-2.60323
11.2167	-2.59666
11.2333	-2.61406
11.25	-2.62978
11.2667	-2.63573
11.2833	-2.65205
11.3	-2.67448
11.3167	-2.68593
11.3333	-2.7166
11.35	-2.74239
11.3667	-2.74071
11.3833	-2.74788
11.4	-2.76482
11.4167	-2.78725
11.4333	-2.80113
11.45	-2.83592
11.4667	-2.87315
11.4833	-2.90321
11.5	-2.9406
11.5167	-2.96944
11.5333	-2.98531
11.55	-3.03597
11.5667	-3.06587
11.5833	-3.09776
11.6	-3.13744
11.6167	-3.16628
11.6333	-3.21419
11.65	-3.23967
11.6667	-3.2888
11.6833	-3.33611
11.7	-3.35777
11.7167	-3.38707
11.7333	-3.44872
11.75	-3.49022
11.7667	-3.53142
11.7833	-3.5778
11.8	-3.6187
11.8167	-3.66737
11.8333	-3.70644
11.85	-3.73802
11.8667	-3.76808
11.8833	-3.84407
11.9	-3.8784
11.9167	-3.89473
11.9333	-3.95683
11.95	-3.98766
11.9667	-4.02061
11.9833	-4.07326
12	-4.1082
12.0167	-4.14909
12.0333	-4.19411
12.05	-4.24248
12.0667	-4.27101
12.0833	-4.29878
12.1	-4.35143
12.1167	-4.39522
12.1333	-4.44634
12.15	-4.49348
12.1667	-4.52141
12.1833	-4.57237
12.2	-4.61418
12.2167	-4.66728
12.2333	-4.7184
12.25	-4.75014
12.2667	-4.78554
12.2833	-4.83681
12.3	-4.88319
12.3167	-4.94499
12.3333	-4.98665
12.35	-5.03624
12.3667	-5.0869
12.3833	-5.12627
12.4	-5.17479
12.4167	-5.2404
12.4333	-5.28511
12.45	-5.34569
12.4667	-5.37544
12.4833	-5.4084
12.5	-5.46852
12.5167	-5.50636
12.5333	-5.53825
12.55	-5.56328
12.5667	-5.61028
12.5833	-5.63942
12.6	-5.67863
12.6167	-5.71251
12.6333	-5.75172
12.65	-5.7856
12.6667	-5.83275
12.6833	-5.85243
12.7	-5.88066
12.7167	-5.90782
12.7333	-5.94185
12.75	-5.94795
12.7667	-5.96626
12.7833	-6.00548
12.8	-6.02074
12.8167	-6.05843
12.8333	-6.0778
12.85	-6.0894
12.8667	-6.08498
12.8833	-6.11183
12.9	-6.12984
12.9167	-6.12785
12.9333	-6.14952
12.95	-6.14372
12.9667	-6.13243
12.9833	-6.14616
13	-6.12892
13.0167	-6.14098
13.0333	-6.1422
13.05	-6.14388
13.0667	-6.14067
13.0833	-6.12785
13.1	-6.11946
13.1167	-6.11473
13.1333	-6.10329
13.15	-6.09306
13.1667	-6.06941
13.1833	-6.05049
13.2	-6.03142
13.2167	-6.02104
13.2333	-6.00533
13.25	-5.9742
13.2667	-5.9623
13.2833	-5.95528
13.3	-5.93361
13.3167	-5.90935
13.3333	-5.8918
13.35	-5.86159
13.3667	-5.84847
13.3833	-5.81947
13.4	-5.78102
13.4167	-5.756
13.4333	-5.7354
13.45	-5.71068
13.4667	-5.68443
13.4833	-5.6588
13.5	-5.653
13.5167	-5.62599
13.5333	-5.60707
13.55	-5.56023
13.5667	-5.532
13.5833	-5.50652
13.6	-5.48882
13.6167	-5.45113
13.6333	-5.45464
13.65	-5.42595
13.6667	-5.39619
13.6833	-5.36812
13.7	-5.34752
13.7167	-5.31273
13.7333	-5.28725
13.75	-5.243
13.7667	-5.22285
13.7833	-5.20744
13.8	-5.1812
13.8167	-5.15602
13.8333	-5.12199
13.85	-5.09239
13.8667	-5.05714
13.8833	-5.02419
13.9	-4.9839
13.9167	-4.95171
13.9333	-4.92409
13.95	-4.87709
13.9667	-4.86443
13.9833	-4.82887
14	-4.79134
14.0167	-4.74724
14.0333	-4.69231
14.05	-4.67232
14.0667	-4.6479
14.0833	-4.59953
14.1	-4.55803
14.1167	-4.54353
14.1333	-4.52034
14.15	-4.49226
14.1667	-4.44603
14.1833	-4.40544
14.2	-4.36348
14.2167	-4.34029
14.2333	-4.30687
14.25	-4.27223
14.2667	-4.25545
14.2833	-4.21516
14.3	-4.19121
14.3167	-4.17595
14.3333	-4.12331
14.35	-4.09065
14.3667	-4.0583
14.3833	-4.02428
14.4	-4.0078
14.4167	-3.97408
14.4333	-3.95332
14.45	-3.9286
14.4667	-3.89656
14.4833	-3.86879
14.5	-3.82317
14.5167	-3.77571
14.5333	-3.75511
14.55	-3.74306
14.5667	-3.72948
14.5833	-3.69499
14.6	-3.65425
14.6167	-3.64082
14.6333	-3.61198
14.65	-3.58986
14.6667	-3.55873
14.6833	-3.55186
14.7	-3.51814
14.7167	-3.49373
14.7333	-3.46382
14.75	-3.45985
14.7667	-3.44704
14.7833	-3.40752
14.8	-3.38982
14.8167	-3.36906
14.8333	-3.34999
14.85	-3.33809
14.8667	-3.34007
14.8833	-3.3239
14.9	-3.30116
14.9167	-3.26439
14.9333	-3.256
14.95	-3.23479
14.9667	-3.20534
14.9833	-3.19435
15	-3.17116
15.0167	-3.1646
15.0333	-3.13576
15.05	-3.11165
15.0667	-3.09914
15.0833	-3.10814
15.1	-3.08205
15.1167	-3.05992
15.1333	-3.03917
15.15	-3.04543
15.1667	-3.02467
15.1833	-2.99751
15.2	-2.98668
15.2167	-2.97234
15.2333	-2.95738
15.25	-2.94731
15.2667	-2.92717
15.2833	-2.91206
15.3	-2.91908
15.3167	-2.89635
15.3333	-2.8933
15.35	-2.88048
15.3667	-2.87285
15.3833	-2.86598
15.4	-2.84233
15.4167	-2.82646
15.4333	-2.83073
15.45	-2.81059
15.4667	-2.79701
15.4833	-2.78786
15.5	-2.78206
15.5167	-2.7578
15.5333	-2.74803
15.55	-2.73705
15.5667	-2.72804
15.5833	-2.71904
15.6	-2.71294
15.6167	-2.7079
15.6333	-2.70317
15.65	-2.6992
15.6667	-2.70592
15.6833	-2.70683
15.7	-2.68715
15.7167	-2.68272
15.7333	-2.68181
15.75	-2.67342
15.7667	-2.66212
15.7833	-2.66945
15.8	-2.65572
15.8167	-2.65297
15.8333	-2.64885
15.85	-2.64076
15.8667	-2.62489
15.8833	-2.62093
15.9	-2.59132
15.9167	-2.59911
15.9333	-2.61223
15.95	-2.61177
15.9667	-2.58934
15.9833	-2.58644
16	-2.59422
16.0167	-2.58125
16.0333	-2.5634
16.05	-2.57027
16.0667	-2.56966
16.0833	-2.56371
16.1	-2.56584
16.1167	-2.54692
16.1333	-2.53761
16.15	-2.51411
16.1667	-2.51946
16.1833	-2.51793
16.2	-2.51808
16.2167	-2.51717
16.2333	-2.49947
16.25	-2.51213
16.2667	-2.50023
16.2833	-2.49641
16.3	-2.50221
16.3167	-2.4984
16.3333	-2.48589
16.35	-2.48787
16.3667	-2.49458
16.3833	-2.50801
16.4	-2.49794
16.4167	-2.4929
16.4333	-2.481
16.45	-2.46819
16.4667	-2.47841
16.4833	-2.4691
16.5	-2.46117
16.5167	-2.4633
16.5333	-2.45735
16.55	-2.45186
16.5667	-2.44057
16.5833	-2.4456
16.6	-2.45888
16.6167	-2.44728
16.6333	-2.45537
16.65	-2.44133
16.6667	-2.42867
16.6833	-2.4366
16.7	-2.44087
16.7167	-2.44041
16.7333	-2.43416
16.75	-2.44637
16.7667	-2.43614
16.7833	-2.42332
16.8	-2.4279
16.8167	-2.41295
16.8333	-2.41402
16.85	-2.41508
16.8667	-2.42104
16.8833	-2.42287
16.9	-2.42439
16.9167	-2.41066
16.9333	-2.41661
16.95	-2.41707
16.9667	-2.41264
16.9833	-2.42226
17	-2.41417
17.0167	-2.416
17.0333	-2.41585
17.05	-2.41463
17.0667	-2.41142
17.0833	-2.39815
17.1	-2.40562
17.1167	-2.40334
17.1333	-2.40837
17.15	-2.41554
17.1667	-2.40089
17.1833	-2.41982
17.2	-2.4221
17.2167	-2.42424
17.2333	-2.41737
17.25	-2.41325
17.2667	-2.4102
17.2833	-2.41661
17.3	-2.42378
17.3167	-2.39922
17.3333	-2.40212
17.35	-2.42058
17.3667	-2.3925
17.3833	-2.3835
17.4	-2.38533
17.4167	-2.38533
17.4333	-2.37968
17.45	-2.37679
17.4667	-2.37434
17.4833	-2.37404
17.5	-2.3597
17.5167	-2.33589
17.5333	-2.35802
17.55	-2.35085
17.5667	-2.34749
17.5833	-2.35802
17.6	-2.33818
17.6167	-2.3455
17.6333	-2.33986
17.65	-2.33116
17.6667	-2.32903
17.6833	-2.33589
17.7	-2.33879
17.7167	-2.35512
17.7333	-2.34627
17.75	-2.34947
17.7667	-2.34215
17.7833	-2.3455
17.8	-2.35756
17.8167	-2.34962
17.8333	-2.32231
17.85	-2.3365
17.8667	-2.34978
17.8833	-2.35161
17.9	-2.3597
17.9167	-2.37755
17.9333	-2.36855
17.95	-2.38396
17.9667	-2.37495
17.9833	-2.37724
18	-2.38182
18.0167	-2.39159
18.0333	-2.4015
18.05	-2.41493
18.0667	-2.42058
18.0833	-2.42836
18.1	-2.43553
18.1167	-2.42638
18.1333	-2.42775
18.15	-2.42912
18.1667	-2.43172
18.1833	-2.43034
18.2	-2.40822
18.2167	-2.42104
18.2333	-2.44453
18.25	-2.4334
18.2667	-2.42821
18.2833	-2.42394
18.3	-2.41066
18.3167	-2.41478
18.3333	-2.41798
18.35	-2.3954
18.3667	-2.37526
18.3833	-2.39037
18.4	-2.36717
18.4167	-2.3777
18.4333	-2.38564
18.45	-2.3687
18.4667	-2.37175
18.4833	-2.35527
18.5	-2.34169
18.5167	-2.36656
18.5333	-2.35237
18.55	-2.35497
18.5667	-2.34993
18.5833	-2.36946
18.6	-2.35451
18.6167	-2.34764
18.6333	-2.33452
18.65	-2.3185
18.6667	-2.32277
18.6833	-2.32567
18.7	-2.30659
18.7167	-2.29836
18.7333	-2.30248
18.75	-2.27669
18.7667	-2.27531
18.7833	-2.26997
18.8	-2.27089
18.8167	-2.25883
18.8333	-2.24144
18.85	-2.21855
18.8667	-2.20802
18.8833	-2.20879
18.9	-2.2036
18.9167	-2.18895
18.9333	-2.16698
18.95	-2.15462
18.9667	-2.13554
18.9833	-2.12959
19	-2.13615
19.0167	-2.11235
19.0333	-2.09709
19.05	-2.08473
19.0667	-2.06657
19.0833	-2.03468
19.1	-2.03774
19.1167	-2.04231
19.1333	-2.03407
19.15	-2.03285
19.1667	-2.03545
19.1833	-2.03224
19.2	-2.03163
19.2167	-2.02141
19.2333	-2.0237
19.25	-2.02263
19.2667	-1.99883
19.2833	-1.99669
19.3	-1.98296
19.3167	-1.99211
19.3333	-1.97777
19.35	-1.96617
19.3667	-1.94939
19.3833	-1.93016
19.4	-1.90544
19.4167	-1.86638
19.4333	-1.84319
19.45	-1.80367
19.4667	-1.7907
19.4833	-1.72798
19.5	-1.66008
19.5167	-1.56868
19.5333	-1.49193
19.55	-1.4138
19.5667	-1.29601
19.5833	-1.18874
19.6	-1.05675
19.6167	-0.937576
19.6333	-0.815659
19.65	-0.697556
19.6667	-0.586777
19.6833	-0.46608
19.7	-0.360184
19.7167	-0.271683
19.7333	-0.225296
19.75	-0.16777
19.7667	-0.13237
19.7833	-0.119705
19.8	-0.138016
19.8167	-0.169296
19.8333	-0.218582
19.85	-0.267258
19.8667	-0.34584
19.8833	-0.430374
19.9	-0.534287
19.9167	-0.625382
19.9333	-0.714798
19.95	-0.83458
19.9667	-0.93956
19.9833	-1.04088
20	-1.11565
20.0167	-1.19164
20.0333	-1.28243
20.05	-1.35933
20.0667	-1.44203
20.0833	-1.51802
20.1	-1.57814
20.1167	-1.63078
20.1333	-1.68953
20.15	-1.77055
20.1667	-1.85051
20.1833	-1.93626
20.2	-2.04338
20.2167	-2.14912
20.2333	-2.2924
20.25	-2.4453
20.2667	-2.61848
20.2833	-2.80739
20.3	-3.06297
20.3167	-3.33611
20.3333	-3.64037
20.35	-3.99361
20.3667	-4.38713
20.3833	-4.84489
20.4	-5.34248
20.4167	-5.87257
20.4333	-6.45821
20.45	-7.05528
20.4667	-7.66716
20.4833	-8.28713
20.5	-8.93684
20.5167	-9.57893
20.5333	-10.1798
20.55	-10.7645
20.5667	-11.3187
20.5833	-11.8261
20.6	-12.246
20.6167	-12.5913
20.6333	-12.886
20.65	-13.1191
20.6667	-13.2874
20.6833	-13.3578
20.7	-13.3521
20.7167	-13.2862
20.7333	-13.1628
20.75	-12.9969
20.7667	-12.8097
20.7833	-12.5637
20.8	-12.2836
20.8167	-12.0083
20.8333	-11.713
20.85	-11.4201
20.8667	-11.1114
20.8833	-10.8242
20.9	-10.5637
20.9167	-10.2802
20.9333	-10.0285
20.95	-9.78142
20.9667	-9.53407
20.9833	-9.329
21	-9.10423
21.0167	-8.899
21.0333	-8.68004
21.05	-8.49587
21.0667	-8.28682
21.0833	-8.0645
21.1	-7.86842
21.1167	-7.67952
21.1333	-7.46895
21.15	-7.26234
21.1667	-7.05971
21.1833	-6.8502
21.2	-6.65123
21.2167	-6.4521
21.2333	-6.26793
21.25	-6.08742
21.2667	-5.89882
21.2833	-5.72884
21.3	-5.56419
21.3167	-5.40108
21.3333	-5.24757
21.35	-5.1046
21.3667	-4.97276
21.3833	-4.8278
21.4	-4.71306
21.4167	-4.59282
21.4333	-4.48357
21.45	-4.38423
21.4667	-4.28917
21.4833	-4.20799
21.5	-4.13277
21.5167	-4.05998
21.5333	-3.98964
21.55	-3.91624
21.5667	-3.85262
21.5833	-3.7925
21.6	-3.73711
21.6167	-3.6689
21.6333	-3.64754
21.65	-3.61137
21.6667	-3.57262
21.6833	-3.52623
21.7	-3.47572
21.7167	-3.42354
21.7333	-3.39394
21.75	-3.37532
21.7667	-3.32771
21.7833	-3.29033
21.8	-3.26729
21.8167	-3.25035
21.8333	-3.22136
21.85	-3.19817
21.8667	-3.153
21.8833	-3.13454
21.9	-3.11073
21.9167	-3.08601
21.9333	-3.06191
21.95	-3.03535
21.9667	-3.02147
21.9833	-3.01094
22	-2.98653
22.0167	-2.94548
22.0333	-2.94273
22.05	-2.93343
22.0667	-2.91878
22.0833	-2.90733
22.1	-2.89406
22.1167	-2.87682
22.1333	-2.86781
22.15	-2.8434
22.1667	-2.82509
22.1833	-2.817
22.2	-2.80922
22.2167	-2.80479
22.2333	-2.80663
22.25	-2.78847
22.2667	-2.77931
22.2833	-2.76482
22.3	-2.75414
22.3167	-2.74178
22.3333	-2.73872
22.35	-2.72423
22.3667	-2.69707
22.3833	-2.70058
22.4	-2.69951
22.4167	-2.69127
22.4333	-2.67876
22.45	-2.68394
22.4667	-2.67464
22.4833	-2.66487
22.5	-2.66426
22.5167	-2.66075
22.5333	-2.64107
22.55	-2.65114
22.5667	-2.64641
22.5833	-2.63405
22.6	-2.62627
22.6167	-2.61391
22.6333	-2.59438
22.65	-2.58629
22.6667	-2.58171
22.6833	-2.58278
22.7	-2.58293
22.7167	-2.5808
22.7333	-2.56966
22.75	-2.56401
22.7667	-2.55257
22.7833	-2.53532
22.8	-2.537
22.8167	-2.53441
22.8333	-2.53288
22.85	-2.52083
22.8667	-2.52693
22.8833	-2.52052
22.9	-2.52022
22.9167	-2.50267
22.9333	-2.49428
22.95	-2.49809
22.9667	-2.50542
22.9833	-2.50114
23	-2.49992
23.0167	-2.50359
23.0333	-2.50404
23.05	-2.50221
23.0667	-2.50175
23.0833	-2.49138
23.1	-2.49107
23.1167	-2.49855
23.1333	-2.48741
23.15	-2.49016
23.1667	-2.48024
23.1833	-2.48665
23.2	-2.49184
23.2167	-2.48177
23.2333	-2.47383
23.25	-2.46803
23.2667	-2.47505
23.2833	-2.48268
23.3	-2.4691
23.3167	-2.45735
23.3333	-2.45399
23.35	-2.47032
23.3667	-2.46529
23.3833	-2.46376
23.4	-2.48055
23.4167	-2.47032
23.4333	-2.46483
23.45	-2.47276
23.4667	-2.46513
23.4833	-2.46269
23.5	-2.45857
23.5167	-2.45735
23.5333	-2.45644
23.55	-2.45064
23.5667	-2.4633
23.5833	-2.47368
23.6	-2.47139
23.6167	-2.47353
23.6333	-2.46712
23.65	-2.48131
23.6667	-2.47002
23.6833	-2.47643
23.7	-2.48573
23.7167	-2.472
23.7333	-2.46849
23.75	-2.46117
23.7667	-2.46422
23.7833	-2.45735
23.8	-2.45262
23.8167	-2.4543
23.8333	-2.4453
23.85	-2.44804
23.8667	-2.45308
23.8833	-2.44026
23.9	-2.43904
23.9167	-2.44011
23.9333	-2.44514
23.95	-2.46346
23.9667	-2.44957
23.9833	-2.44774
24	-2.44514
24.0167	-2.425
24.0333	-2.4279
24.05	-2.4366
24.0667	-2.4128
24.0833	-2.41432
24.1	-2.42668
24.1167	-2.41097
24.1333	-2.40364
24.15	-2.40471
24.1667	-2.41402
24.1833	-2.40379
24.2	-2.41188
24.2167	-2.42394
24.2333	-2.42149
24.25	-2.41539
24.2667	-2.42363
24.2833	-2.42439
24.3	-2.41753
24.3167	-2.39738
24.3333	-2.38533
24.35	-2.40013
24.3667	-2.38625
24.3833	-2.38899
24.4	-2.38594
24.4167	-2.38731
24.4333	-2.3867
24.45	-2.38838
24.4667	-2.37755
24.4833	-2.37175
24.5	-2.37175
24.5167	-2.37236
24.5333	-2.37297
24.55	-2.39693
24.5667	-2.39326
24.5833	-2.38853
24.6	-2.39403
24.6167	-2.3954
24.6333	-2.40273
24.65	-2.39525
24.6667	-2.3719
24.6833	-2.37343
24.7	-2.39052
24.7167	-2.37801
24.7333	-2.38091
24.75	-2.37206
24.7667	-2.38197
24.7833	-2.37587
24.8	-2.36656
24.8167	-2.3719
24.8333	-2.37862
24.85	-2.3954
24.8667	-2.40181
24.8833	-2.37892
24.9	-2.38609
24.9167	-2.36885
24.9333	-2.38838
24.95	-2.38564
24.9667	-2.37083
24.9833	-2.37755
25	-2.36351
25.0167	-2.37038
25.0333	-2.38091
25.05	-2.39372
25.0667	-2.38915
25.0833	-2.3838
25.1	-2.37618
25.1167	-2.37618
25.1333	-2.37663
25.15	-2.3867
25.1667	-2.3835
25.1833	-2.3629
25.2	-2.36107
25.2167	-2.35603
25.2333	-2.36656
25.25	-2.36061
25.2667	-2.35588
25.2833	-2.36717
25.3	-2.37938
25.3167	-2.38716
25.3333	-2.38045
25.35	-2.38121
25.3667	-2.3774
25.3833	-2.37618
25.4	-2.36931
25.4167	-2.35298
25.4333	-2.36366
25.45	-2.35924
25.4667	-2.35786
25.4833	-2.36992
25.5	-2.38426
25.5167	-2.37465
25.5333	-2.36305
25.55	-2.36397
25.5667	-2.35939
25.5833	-2.36321
25.6	-2.37343
25.6167	-2.38152
25.6333	-2.39021
25.65	-2.38152
25.6667	-2.38731
25.6833	-2.37892
25.7	-2.3864
25.7167	-2.37679
25.7333	-2.36107
25.75	-2.36
25.7667	-2.37099
25.7833	-2.38213
25.8	-2.35771
25.8167	-2.351
25.8333	-2.35725
25.85	-2.3542
25.8667	-2.35008
25.8833	-2.35329
25.9	-2.34993
25.9167	-2.35497
25.9333	-2.35405
25.95	-2.33955
25.9667	-2.35695
25.9833	-2.35268
26	-2.35466
26.0167	-2.37007
26.0333	-2.3542
26.05	-2.35924
26.0667	-2.36275
26.0833	-2.3362
26.1	-2.34276
26.1167	-2.3455
26.1333	-2.34932
26.15	-2.3423
26.1667	-2.34947
26.1833	-2.35069
26.2	-2.33757
26.2167	-2.34871
26.2333	-2.34962
26.25	-2.3539
26.2667	-2.34764
26.2833	-2.34459
26.3	-2.34428
26.3167	-2.35756
26.3333	-2.33009
26.35	-2.32475
26.3667	-2.3362
26.3833	-2.33101
26.4	-2.33727
26.4167	-2.33635
26.4333	-2.3278
26.45	-2.33131
26.4667	-2.33879
26.4833	-2.3243
26.5	-2.33971
26.5167	-2.32689
26.5333	-2.32567
26.55	-2.31926
26.5667	-2.31773
26.5833	-2.32353
26.6	-2.33238
26.6167	-2.3214
26.6333	-2.32933
26.65	-2.33421
26.6667	-2.31834
26.6833	-2.32903
26.7	-2.32384
26.7167	-2.32033
26.7333	-2.3243
26.75	-2.31972
26.7667	-2.31377
26.7833	-2.30782
26.8	-2.29256
26.8167	-2.28249
26.8333	-2.28737
26.85	-2.26952
26.8667	-2.25883
26.8833	-2.2477
26.9	-2.24159
26.9167	-2.21886
26.9333	-2.20879
26.95	-2.20116
26.9667	-2.17903
26.9833	-2.15736
27	-2.12547
27.0167	-2.09328
27.0333	-2.06581
27.05	-2.02644
27.0667	-1.98235
27.0833	-1.94115
27.1	-1.87431
27.1167	-1.81984
27.1333	-1.75972
27.15	-1.68205
27.1667	-1.60866
27.1833	-1.52718
27.2	-1.46004
27.2167	-1.36665
27.2333	-1.28395
27.25	-1.1718
27.2667	-1.08086
27.2833	-0.988998
27.3	-0.869064
27.3167	-0.775986
27.3333	-0.67894
27.35	-0.550613
27.3667	-0.436173
27.3833	-0.340958
27.4	-0.216751
27.4167	-0.0965118
27.4333	0.0104523
27.45	0.128098
27.4667	0.230026
27.4833	0.324326
27.5	0.411148
27.5167	0.503311
27.5333	0.600662
27.55	0.667801
27.5667	0.729141
27.5833	0.789108
27.6	0.846787
27.6167	0.884018
27.6333	0.91301
27.65	0.942764
27.6667	0.948868
27.6833	0.966415
27.7	0.954208
27.7167	0.928574
27.7333	0.897141
27.75	0.870132
27.7667	0.841293
27.7833	0.781937
27.8	0.735092
27.8167	0.681229
27.8333	0.618515
27.85	0.54985
27.8667	0.483017
27.8833	0.429459
27.9	0.359573
27.9167	0.273514
27.9333	0.178604
27.95	0.105209
27.9667	0.0341034
27.9833	-0.0244904
28	-0.106735
28.0167	-0.189133
28.0333	-0.265121
28.05	-0.324326
28.0667	-0.398178
28.0833	-0.457535
28.1	-0.525284
28.1167	-0.600967
28.1333	-0.655136
28.15	-0.713577
28.1667	-0.779648
28.1833	-0.819931
28.2	-0.85762
28.2167	-0.898666
28.2333	-0.946884
28.25	-0.991287
28.2667	-1.02776
28.2833	-1.07658
28.3	-1.1248
28.3167	-1.15044
28.3333	-1.17683
28.35	-1.20491
28.3667	-1.26106
28.3833	-1.26549
28.4	-1.29677
28.4167	-1.33659
28.4333	-1.35841
28.45	-1.38878
28.4667	-1.40404
28.4833	-1.44783
28.5	-1.46843
28.5167	-1.47224
28.5333	-1.48155
28.55	-1.50063
28.5667	-1.51344
28.5833	-1.54198
28.6	-1.549
28.6167	-1.57967
28.6333	-1.59447
28.65	-1.6172
28.6667	-1.6143
28.6833	-1.63475
28.7	-1.64589
28.7167	-1.6497
28.7333	-1.6584
28.75	-1.6671
28.7667	-1.69258
28.7833	-1.70647
28.8	-1.71043
28.8167	-1.72966
28.8333	-1.73271
28.85	-1.73729
28.8667	-1.75819
28.8833	-1.77315
28.9	-1.77696
28.9167	-1.77162
28.9333	-1.79436
28.95	-1.80412
28.9667	-1.80656
28.9833	-1.8116
29	-1.83479
29.0167	-1.84563
29.0333	-1.8499
29.05	-1.86745
29.0667	-1.85753
29.0833	-1.86302
29.1	-1.85814
29.1167	-1.87157
29.1333	-1.90361
29.15	-1.91338
29.1667	-1.89507
29.1833	-1.89964
29.2	-1.91322
29.2167	-1.90498
29.2333	-1.92314
29.25	-1.91032
29.2667	-1.92009
29.2833	-1.93596
29.3	-1.93611
29.3167	-1.93871
29.3333	-1.94099
29.35	-1.95198
29.3667	-1.95091
29.3833	-1.95641
29.4	-1.9474
29.4167	-1.97044
29.4333	-1.98677
29.45	-1.97914
29.4667	-1.98112
29.4833	-2.00783
29.5	-2.01653
29.5167	-1.99638
29.5333	-2.00661
29.55	-2.01195
29.5667	-2.00935
29.5833	-2.02461
29.6	-2.01912
29.6167	-2.024
29.6333	-2.0327
29.65	-2.04659
29.6667	-2.0562
29.6833	-2.05757
29.7	-2.05254
29.7167	-2.05162
29.7333	-2.05009
29.75	-2.06108
29.7667	-2.06306
29.7833	-2.07985
29.8	-2.0591
29.8167	-2.06261
29.8333	-2.07039
29.85	-2.08153
29.8667	-2.0919
29.8833	-2.08519
29.9	-2.08275
29.9167	-2.09099
29.9333	-2.09587
29.95	-2.10197
29.9667	-2.09206
29.9833	-2.1035
30	-2.09496

## Sheet: MW Results
Administrative Information
File name	ICF_04_12_2024-0010.sample
Analysed by	OBPC
Date of analysis	09 December 2024 13:14:57
Analysis comments
Analysis Module	GPC Analysis
MW Averages
Peaks	Mp (g/mol)	Mn (g/mol)	Mw (g/mol)	Mz (g/mol)	Mz+1 (g/mol)	Mv (g/mol)	PD
Peak 1	185264	40479	257627	834725	1763502	729815	6.36446
Sample Parameters
Injection volume (µL)	200
Concentration options	Undefined
Concentration (mg/mL)	1
dn/dc (mL/g)	0.1
UV extinction coefficient [(mg/mL)-¹][cm-¹]	1
Mark-Houwink K ((10e-5) dL/g)	14.1
Mark-Houwink Alpha	0.7
Concentration Detector Used in Analysis	RI
Baseline regions	Start (mins)	End (mins)
Baseline region 1	5.93333	7.43333
Baseline region 2	23.4833	23.7667
Peaks	Start (mins)	End (mins)
Peak 1	10.4833	16.5833
	Trace	Peak Max RT (mins)	Peak Area (mV.s)	Peak Height (mV)
	RI	12.9333	533.017	-3.77121
Flowrate region	Start (mins)	End (mins)
IDD
Reference detector	Undefined
IDD Undefined (secs)	0
Last modified by	OBPC
Last modified date	09 December 2024 13:14:57
Comments
System Calibration
Detector Constants
Entered Parameters For Concentration
Concentration (mg/mL)	0
Injection volume (µL)	0
dn/dc (mL/g)	0
UV extinction coefficient [(mg/mL)-¹][cm-¹]	0
Eluent refractive index	0
Flow rate (mL/min)	0
Comments
Entered Parameters For LS
Mp	0
LS wavelength (nm)	0
Comments
Entered Parameters For Viscometer
Known IV (dL/g)	0
Use Constant Inlet Pressure	No
Comments
System Calibration Information
Created by	OBPC
Creation date	29 October 2024 11:18:00
Last modified by	OBPC
Last modified date	29 October 2024 11:18:00
Information
Sample file used for calibration
Concentration Regions
Baseline regions	Start (mins)	End (mins)
Peaks	Start (mins)	End (mins)
Flowrate region	Start (mins)	End (mins)
LS Regions
Baseline regions	Start (mins)	End (mins)
Peaks	Start (mins)	End (mins)
Flowrate region	Start (mins)	End (mins)
VS Regions
Baseline regions	Start (mins)	End (mins)
Peaks	Start (mins)	End (mins)
Flowrate region	Start (mins)	End (mins)
System Calibration Peak Information
Channel	Peak Max RT (mins)	Peak Height (mV)	Peak Area (mV.s)
Flowrate Information
FRM Name
FRM RT (mins)	0
FRCF	1
Column Calibration
Name	2024-10-29-001
Created By	OBPC
Creation Date	29/10/2024 16:43:21
Last Modified By	OBPC
Last Modified	29/10/2024 16:46:00
High Limit RT (mins)	10.3167
Low Limit RT (mins)	17.05
High Limit MW	6542896
Low Limit MW	585
K (Input) ((10e-5) dL/g)	14.1
Alpha (Input)	0.7
Calibration Flow Marker Name
Calibration Flow Marker RT (mins)	0
Calibration Comments	GPC Column Calibration created 29 October 2024 by OBPC GPC Column Calibration amended 29 October 2024 by OBPC GPC Column Calibration amended 29 October 2024 by OBPC
Calibration Type	GPC Narrow Standard
Curve Fit Type	Polynomial
Order Of Curve Fit	5
Number Of Points	11
Curve Fit Equation	y = - 0.0006266x^5 + 0.04142x^4 - 1.085x^3 + 14.06x^2 - 90.8x + 242.2
Coeff a	242.186
Coeff b	-90.7983
Coeff c	14.0588
Coeff d	-1.08465
Coeff e	0.0414232
Coeff f	-0.000626569
Residual Sum Of Squares	0.000581819
Corrected Sum Of Squares	18.6999
Coefficient Of Determination	0.999969
Standard Y Error Estimate	0.0107872
Linear Correlation Coefficient	-0.999868

## Sheet: Slice Table
Slice Table
RT (mins)	RI	Norm Ht	Cum Ht	Mw (g/mol)	logM	dwdlogM	Outside Calib	Peak
10.4833	-0.0347062	6.51083e-05	0.999967	5217980	6.7175	0.00691161	No	1
10.5	-0.0367028	6.8854e-05	0.999888	5102961	6.70782	0.00940285	No	1
10.5167	-0.0602144	0.000112961	0.999794	4990736	6.69816	0.00991649	No	1
10.5333	-0.0417643	7.83492e-05	0.999706	4881221	6.68853	0.00845369	No	1
10.55	-0.0449816	8.43849e-05	0.999631	4774335	6.67891	0.00705828	No	1
10.5667	-0.0272944	5.1204e-05	0.999566	4670001	6.66932	0.00659713	No	1
10.5833	-0.0401248	7.52736e-05	0.999502	4568143	6.65974	0.00661224	No	1
10.6	-0.0273205	5.12528e-05	0.999436	4468690	6.65018	0.00725621	No	1
10.6167	-0.0465596	8.73451e-05	0.999357	4371571	6.64064	0.00926791	No	1
10.6333	-0.0476407	8.93733e-05	0.999272	4276720	6.63111	0.00866907	No	1
10.65	-0.0403295	7.56575e-05	0.999198	4184073	6.6216	0.00678744	No	1
10.6667	-0.0284406	5.33542e-05	0.999124	4093567	6.6121	0.00886611	No	1
10.6833	-0.0612601	0.000114923	0.99903	4005142	6.60262	0.010965	No	1
10.7	-0.0495238	9.29059e-05	0.998936	3918740	6.59315	0.00886454	No	1
10.7167	-0.0399238	7.48964e-05	0.998855	3834305	6.58369	0.00836299	No	1
10.7333	-0.0443618	8.32222e-05	0.998769	3751785	6.57424	0.00976935	No	1
10.75	-0.0539879	0.000101281	0.998668	3671126	6.5648	0.011709	No	1
10.7667	-0.0637665	0.000119625	0.998552	3592279	6.55537	0.0127099	No	1
10.7833	-0.0639321	0.000119936	0.998432	3515195	6.54595	0.0128756	No	1
10.8	-0.0653184	0.000122536	0.998306	3439827	6.53654	0.0139229	No	1
10.8167	-0.0743341	0.00013945	0.998173	3366131	6.52713	0.0143771	No	1
10.8333	-0.0697695	0.000130887	0.998039	3294063	6.51773	0.0140234	No	1
10.85	-0.0706981	0.000132629	0.997902	3223580	6.50834	0.0151467	No	1
10.8667	-0.0809345	0.000151832	0.997754	3154641	6.49895	0.0164684	No	1
10.8833	-0.0838467	0.000157295	0.997603	3087208	6.48957	0.0157152	No	1
10.9	-0.0733311	0.000137568	0.997452	3021243	6.48019	0.0165324	No	1
10.9167	-0.0919598	0.000172515	0.997286	2956707	6.47081	0.0188756	No	1
10.9333	-0.0967031	0.000181414	0.997104	2893567	6.46143	0.019936	No	1
10.95	-0.102514	0.000192316	0.996916	2831786	6.45206	0.0200793	No	1
10.9667	-0.0981024	0.000184039	0.996729	2771333	6.44269	0.0197478	No	1
10.9833	-0.0991835	0.000186067	0.996539	2712173	6.43332	0.0207897	No	1
11	-0.108504	0.000203553	0.996335	2654277	6.42395	0.0227926	No	1
11.0167	-0.119199	0.000223615	0.996109	2597613	6.41457	0.0254965	No	1
11.0333	-0.135538	0.000254268	0.995863	2542153	6.4052	0.0269155	No	1
11.05	-0.133415	0.000250285	0.995605	2487868	6.39583	0.0282256	No	1
11.0667	-0.148687	0.000278935	0.995324	2434729	6.38645	0.0317773	No	1
11.0833	-0.168994	0.000317031	0.99501	2382711	6.37707	0.0350505	No	1
11.1	-0.18152	0.000340528	0.994675	2331787	6.36769	0.0364131	No	1
11.1167	-0.182753	0.000342842	0.994327	2281933	6.3583	0.0377117	No	1
11.1333	-0.194668	0.000365195	0.993957	2233122	6.34891	0.0410494	No	1
11.15	-0.216349	0.000405867	0.993562	2185333	6.33952	0.0431937	No	1
11.1667	-0.216362	0.000405891	0.993161	2138541	6.33012	0.0420607	No	1
11.1833	-0.205236	0.000385019	0.992755	2092725	6.32071	0.0443349	No	1
11.2	-0.239428	0.000449164	0.992325	2047862	6.3113	0.0470452	No	1
11.2167	-0.232728	0.000436594	0.991877	2003932	6.30188	0.0480634	No	1
11.2333	-0.249983	0.000468965	0.991408	1960914	6.29246	0.0512945	No	1
11.25	-0.26556	0.000498187	0.990915	1918787	6.28303	0.0533809	No	1
11.2667	-0.271371	0.000509089	0.990401	1877533	6.27359	0.0555225	No	1
11.2833	-0.287559	0.000539456	0.989858	1837132	6.26414	0.0592939	No	1
11.3	-0.30985	0.000581273	0.989282	1797566	6.25468	0.0625724	No	1
11.3167	-0.321154	0.00060248	0.988671	1758818	6.24522	0.0666589	No	1
11.3333	-0.351685	0.000659755	0.988013	1720869	6.23575	0.0721549	No	1
11.35	-0.377332	0.00070787	0.987318	1683703	6.22627	0.0744392	No	1
11.3667	-0.375514	0.00070446	0.98661	1647303	6.21677	0.0748777	No	1
11.3833	-0.382546	0.000717652	0.985887	1611653	6.20727	0.0771497	No	1
11.4	-0.399344	0.000749164	0.985136	1576738	6.19776	0.0809184	No	1
11.4167	-0.421635	0.000790981	0.984348	1542542	6.18824	0.084376	No	1
11.4333	-0.435381	0.000816768	0.983522	1509050	6.1787	0.0890389	No	1
11.45	-0.470031	0.000881772	0.982639	1476247	6.16916	0.0959818	No	1
11.4667	-0.507123	0.000951356	0.981691	1444121	6.1596	0.102442	No	1
11.4833	-0.537043	0.00100749	0.98068	1412655	6.15004	0.108898	No	1
11.5	-0.574288	0.00107736	0.979606	1381838	6.14046	0.115217	No	1
11.5167	-0.602987	0.0011312	0.978481	1351656	6.13087	0.119415	No	1
11.5333	-0.618717	0.0011607	0.977304	1322097	6.12126	0.125729	No	1
11.55	-0.669237	0.00125548	0.976058	1293146	6.11165	0.133393	No	1
11.5667	-0.699004	0.00131132	0.974746	1264793	6.10202	0.139208	No	1
11.5833	-0.730756	0.00137089	0.973371	1237025	6.09238	0.145953	No	1
11.6	-0.770289	0.00144505	0.971931	1209831	6.08272	0.152382	No	1
11.6167	-0.798988	0.00149889	0.970423	1183199	6.07306	0.15959	No	1
11.6333	-0.846761	0.00158851	0.968845	1157118	6.06338	0.16645	No	1
11.65	-0.872104	0.00163605	0.967198	1131576	6.05368	0.173408	No	1
11.6667	-0.921098	0.00172797	0.965471	1106564	6.04398	0.18245	No	1
11.6833	-0.96826	0.00181644	0.963666	1082071	6.03426	0.188817	No	1
11.7	-0.989788	0.00185683	0.961806	1058087	6.02452	0.193429	No	1
11.7167	-1.01895	0.00191153	0.959879	1034600	6.01477	0.20187	No	1
11.7333	-1.08045	0.00202691	0.957861	1011603	6.00501	0.211457	No	1
11.75	-1.12182	0.00210451	0.955757	989085	5.99523	0.219055	No	1
11.7667	-1.16288	0.00218154	0.953573	967036	5.98544	0.227096	No	1
11.7833	-1.20912	0.0022683	0.951307	945448	5.97564	0.235083	No	1
11.8	-1.24988	0.00234475	0.948958	924311	5.96582	0.243263	No	1
11.8167	-1.29841	0.0024358	0.946527	903617	5.95598	0.251244	No	1
11.8333	-1.33734	0.00250882	0.944021	883357	5.94614	0.257574	No	1
11.85	-1.36878	0.00256781	0.941454	863523	5.93627	0.263029	No	1
11.8667	-1.3987	0.00262394	0.938808	844105	5.9264	0.27268	No	1
11.8833	-1.47455	0.00276624	0.936061	825097	5.91651	0.282708	No	1
11.9	-1.50874	0.00283038	0.933239	806490	5.9066	0.287061	No	1
11.9167	-1.52493	0.00286075	0.930357	788276	5.89668	0.294025	No	1
11.9333	-1.58689	0.00297699	0.927394	770447	5.88674	0.302336	No	1
11.95	-1.61758	0.00303455	0.924359	752997	5.87679	0.307877	No	1
11.9667	-1.6504	0.00309612	0.921253	735917	5.86683	0.315455	No	1
11.9833	-1.7029	0.00319462	0.918067	719201	5.85685	0.323199	No	1
12	-1.7377	0.00325991	0.914804	702841	5.84686	0.329819	No	1
12.0167	-1.77846	0.00333636	0.911465	686830	5.83685	0.337365	No	1
12.0333	-1.82333	0.00342054	0.908043	671161	5.82683	0.345589	No	1
12.05	-1.87156	0.00351102	0.904541	655829	5.81679	0.352253	No	1
12.0667	-1.89996	0.00356429	0.900977	640825	5.80674	0.356979	No	1
12.0833	-1.92759	0.00361613	0.897349	626145	5.79667	0.363939	No	1
12.1	-1.98009	0.00371462	0.893638	611781	5.7866	0.372373	No	1
12.1167	-2.02374	0.00379652	0.889838	597726	5.7765	0.380644	No	1
12.1333	-2.07472	0.00389215	0.885947	583976	5.76639	0.389207	No	1
12.15	-2.12173	0.00398034	0.881976	570524	5.75627	0.395602	No	1
12.1667	-2.14952	0.00403246	0.877932	557364	5.74614	0.402336	No	1
12.1833	-2.20034	0.00412781	0.873808	544491	5.73599	0.410338	No	1
12.2	-2.24201	0.00420598	0.869597	531898	5.72583	0.418521	No	1
12.2167	-2.29497	0.00430533	0.865292	519580	5.71565	0.427544	No	1
12.2333	-2.34595	0.00440097	0.8609	507532	5.70546	0.434584	No	1
12.25	-2.37755	0.00446024	0.856438	495748	5.69526	0.440166	No	1
12.2667	-2.41281	0.00452639	0.851903	484223	5.68505	0.447533	No	1
12.2833	-2.46394	0.00462231	0.847283	472952	5.67482	0.455893	No	1
12.3	-2.51018	0.00470907	0.842566	461930	5.66458	0.465203	No	1
12.3167	-2.57184	0.00482474	0.837751	451151	5.65432	0.474065	No	1
12.3333	-2.61336	0.00490263	0.832844	440611	5.64406	0.481797	No	1
12.35	-2.66281	0.0049954	0.827848	430305	5.63378	0.490339	No	1
12.3667	-2.71333	0.00509017	0.822763	420229	5.62349	0.497938	No	1
12.3833	-2.75256	0.00516376	0.817594	410377	5.61318	0.505333	No	1
12.4	-2.80094	0.00525453	0.812331	400745	5.60287	0.515105	No	1
12.4167	-2.86642	0.00537736	0.806963	391328	5.59254	0.524518	No	1
12.4333	-2.91098	0.00546097	0.801495	382123	5.5822	0.533462	No	1
12.45	-2.97142	0.00557435	0.795934	373124	5.57185	0.541042	No	1
12.4667	-3.00104	0.0056299	0.790303	364328	5.56149	0.546117	No	1
12.4833	-3.03386	0.00569147	0.784598	355731	5.55112	0.553936	No	1
12.5	-3.09384	0.00580399	0.778804	347328	5.54074	0.562192	No	1
12.5167	-3.13154	0.00587472	0.772932	339115	5.53035	0.567895	No	1
12.5333	-3.16329	0.00593429	0.767	331088	5.51994	0.572443	No	1
12.55	-3.18818	0.00598097	0.761009	323244	5.50953	0.578354	No	1
12.5667	-3.23503	0.00606888	0.754948	315579	5.49911	0.584637	No	1
12.5833	-3.26404	0.00612329	0.748819	308088	5.48867	0.590222	No	1
12.6	-3.30311	0.00619659	0.742625	300769	5.47823	0.596234	No	1
12.6167	-3.33685	0.00625988	0.736362	293617	5.46778	0.602249	No	1
12.6333	-3.37592	0.00633318	0.730031	286630	5.45732	0.608267	No	1
12.65	-3.40966	0.00639647	0.723628	279803	5.44685	0.615	No	1
12.6667	-3.45667	0.00648466	0.717156	273134	5.43638	0.620466	No	1
12.6833	-3.47621	0.00652133	0.71063	266618	5.42589	0.624245	No	1
12.7	-3.5043	0.00657402	0.704056	260253	5.4154	0.628702	No	1
12.7167	-3.53132	0.00662471	0.697427	254036	5.4049	0.633686	No	1
12.7333	-3.56521	0.00668828	0.690752	247963	5.39439	0.636798	No	1
12.75	-3.57117	0.00669947	0.684046	242030	5.38387	0.63852	No	1
12.7667	-3.58935	0.00673356	0.677302	236237	5.37335	0.643207	No	1
12.7833	-3.62842	0.00680687	0.670506	230578	5.36282	0.647632	No	1
12.8	-3.64354	0.00683523	0.66366	225051	5.35228	0.651931	No	1
12.8167	-3.68109	0.00690567	0.656763	219654	5.34174	0.656609	No	1
12.8333	-3.70033	0.00694176	0.649824	214383	5.33119	0.658979	No	1
12.85	-3.71179	0.00696326	0.642868	209236	5.32064	0.659248	No	1
12.8667	-3.70722	0.0069547	0.635898	204210	5.31008	0.660889	No	1
12.8833	-3.73394	0.00700481	0.628897	199303	5.29951	0.664537	No	1
12.9	-3.7518	0.00703833	0.621867	194511	5.28894	0.665641	No	1
12.9167	-3.74968	0.00703435	0.614821	189832	5.27837	0.667085	No	1
12.9333	-3.77121	0.00707473	0.607759	185264	5.26779	0.668209	No	1
12.95	-3.76527	0.00706359	0.600698	180805	5.25721	0.666428	No	1
12.9667	-3.75384	0.00704215	0.593643	176451	5.24662	0.666397	No	1
12.9833	-3.76743	0.00706765	0.58659	172201	5.23604	0.665857	No	1
13	-3.75005	0.00703504	0.57954	168052	5.22544	0.665187	No	1
13.0167	-3.76197	0.00705739	0.572488	164002	5.21485	0.66617	No	1
13.0333	-3.76305	0.00705942	0.565428	160048	5.20425	0.666252	No	1
13.05	-3.76459	0.00706231	0.558367	156189	5.19365	0.665961	No	1
13.0667	-3.76124	0.00705604	0.551315	152423	5.18305	0.664407	No	1
13.0833	-3.74828	0.00703173	0.544281	148746	5.17245	0.662412	No	1
13.1	-3.73975	0.00701572	0.537263	145158	5.16184	0.661151	No	1
13.1167	-3.73488	0.00700659	0.530259	141656	5.15123	0.65964	No	1
13.1333	-3.7233	0.00698486	0.523273	138239	5.14063	0.657661	No	1
13.15	-3.71294	0.00696542	0.516313	134903	5.13002	0.654621	No	1
13.1667	-3.68915	0.00692078	0.50939	131649	5.11942	0.650831	No	1
13.1833	-3.67009	0.00688503	0.502505	128472	5.10881	0.647464	No	1
13.2	-3.65087	0.00684898	0.495651	125373	5.0982	0.64487	No	1
13.2167	-3.64036	0.00682926	0.488824	122348	5.0876	0.642591	No	1
13.2333	-3.6245	0.00679951	0.482031	119397	5.07699	0.638494	No	1
13.25	-3.59323	0.00674085	0.475281	116517	5.06639	0.634752	No	1
13.2667	-3.58119	0.00671826	0.46856	113707	5.05579	0.63316	No	1
13.2833	-3.57403	0.00670483	0.461861	110965	5.04519	0.63072	No	1
13.3	-3.55223	0.00666392	0.455198	108290	5.03459	0.626771	No	1
13.3167	-3.52782	0.00661815	0.448576	105681	5.024	0.623203	No	1
13.3333	-3.51014	0.00658497	0.441997	103134	5.0134	0.619123	No	1
13.35	-3.47979	0.00652803	0.435461	100650	5.00281	0.61545	No	1
13.3667	-3.46652	0.00650315	0.428964	98226	4.99223	0.6119	No	1
13.3833	-3.43739	0.0064485	0.42252	95862	4.98165	0.606119	No	1
13.4	-3.3988	0.0063761	0.416137	93555	4.97107	0.600702	No	1
13.4167	-3.37364	0.00632889	0.409806	91305	4.96049	0.596882	No	1
13.4333	-3.3529	0.00628999	0.403517	89110	4.94993	0.593102	No	1
13.45	-3.32804	0.00624335	0.397274	86968	4.93936	0.588833	No	1
13.4667	-3.30165	0.00619386	0.39108	84879	4.9288	0.584495	No	1
13.4833	-3.27588	0.0061455	0.384924	82842	4.91825	0.581987	No	1
13.5	-3.26994	0.00613436	0.3788	80854	4.9077	0.579369	No	1
13.5167	-3.24279	0.00608344	0.372712	78915	4.89716	0.575596	No	1
13.5333	-3.22373	0.00604768	0.366677	77024	4.88663	0.570067	No	1
13.55	-3.17675	0.00595954	0.360708	75179	4.8761	0.563717	No	1
13.5667	-3.14838	0.00590632	0.3548	73379	4.86557	0.559279	No	1
13.5833	-3.12276	0.00585825	0.348938	71624	4.85506	0.555789	No	1
13.6	-3.10492	0.00582478	0.343122	69912	4.84455	0.551219	No	1
13.6167	-3.06709	0.00575382	0.337349	68242	4.83405	0.548552	No	1
13.6333	-3.07046	0.00576014	0.331603	66613	4.82356	0.546701	No	1
13.65	-3.04163	0.00570606	0.325897	65025	4.81308	0.541882	No	1
13.6667	-3.01174	0.00564998	0.320246	63475	4.8026	0.537125	No	1
13.6833	-2.98352	0.00559705	0.314645	61964	4.79214	0.533194	No	1
13.7	-2.96279	0.00555814	0.309093	60489	4.78168	0.528667	No	1
13.7167	-2.92786	0.00549262	0.303596	59052	4.77123	0.523707	No	1
13.7333	-2.90223	0.00544455	0.29816	57649	4.76079	0.517899	No	1
13.75	-2.85784	0.00536128	0.292787	56282	4.75037	0.512574	No	1
13.7667	-2.83756	0.00532323	0.287461	54948	4.73995	0.509849	No	1
13.7833	-2.82201	0.00529405	0.282172	53646	4.72954	0.50658	No	1
13.8	-2.79563	0.00524456	0.276926	52377	4.71914	0.502435	No	1
13.8167	-2.77031	0.00519706	0.271733	51140	4.70876	0.49759	No	1
13.8333	-2.73614	0.00513297	0.266598	49932	4.69838	0.492345	No	1
13.85	-2.7064	0.00507717	0.261523	48755	4.68802	0.48699	No	1
13.8667	-2.67102	0.00501079	0.256511	47606	4.67766	0.481329	No	1
13.8833	-2.63792	0.00494869	0.251565	46486	4.66732	0.475209	No	1
13.9	-2.59749	0.00487286	0.246688	45394	4.657	0.469154	No	1
13.9167	-2.56516	0.0048122	0.241873	44328	4.64668	0.464247	No	1
13.9333	-2.5374	0.00476013	0.237122	43289	4.63638	0.45799	No	1
13.95	-2.49026	0.0046717	0.232434	42275	4.62608	0.45309	No	1
13.9667	-2.47746	0.00464768	0.227797	41286	4.6158	0.449233	No	1
13.9833	-2.44177	0.00458072	0.223217	40322	4.60554	0.4431	No	1
14	-2.40409	0.00451004	0.218709	39381	4.59529	0.436178	No	1
14.0167	-2.35985	0.00442705	0.214287	38464	4.58505	0.427651	No	1
14.0333	-2.30478	0.00432374	0.209947	37569	4.57483	0.421322	No	1
14.05	-2.28465	0.00428598	0.205662	36696	4.56462	0.417789	No	1
14.0667	-2.2601	0.00423991	0.201433	35844	4.55442	0.411642	No	1
14.0833	-2.21159	0.00414891	0.197281	35013	4.54423	0.403908	No	1
14.1	-2.16995	0.00407079	0.193197	34203	4.53406	0.399287	No	1
14.1167	-2.15531	0.00404333	0.189158	33413	4.52392	0.396352	No	1
14.1333	-2.13198	0.00399956	0.18516	32642	4.51378	0.392157	No	1
14.15	-2.10376	0.00394663	0.181222	31889	4.50364	0.38582	No	1
14.1667	-2.05739	0.00385963	0.177359	31156	4.49354	0.378308	No	1
14.1833	-2.01666	0.00378323	0.173577	30440	4.48344	0.371175	No	1
14.2	-1.97456	0.00370424	0.169863	29742	4.47337	0.365647	No	1
14.2167	-1.95123	0.00366047	0.166207	29060	4.4633	0.360903	No	1
14.2333	-1.91767	0.00359752	0.16261	28396	4.45326	0.35508	No	1
14.25	-1.88289	0.00353228	0.159069	27747	4.44322	0.3508	No	1
14.2667	-1.86597	0.00350053	0.15558	27115	4.43321	0.34598	No	1
14.2833	-1.82555	0.0034247	0.152147	26497	4.4232	0.340477	No	1
14.3	-1.80145	0.00337949	0.148763	25895	4.41322	0.337311	No	1
14.3167	-1.78605	0.00335061	0.14543	25307	4.40324	0.331438	No	1
14.3333	-1.73327	0.00325159	0.142169	24734	4.39329	0.323907	No	1
14.35	-1.70048	0.00319007	0.138978	24175	4.38337	0.318272	No	1
14.3667	-1.66799	0.00312912	0.13585	23629	4.37345	0.31249	No	1
14.3833	-1.63382	0.00306502	0.132776	23096	4.36354	0.308196	No	1
14.4	-1.6172	0.00303385	0.12975	22576	4.35365	0.303919	No	1
14.4167	-1.58334	0.00297032	0.126774	22069	4.34378	0.299223	No	1
14.4333	-1.56245	0.00293113	0.123844	21574	4.33393	0.29537	No	1
14.45	-1.53759	0.0028845	0.120963	21091	4.3241	0.290428	No	1
14.4667	-1.50541	0.00282412	0.118137	20619	4.31427	0.285178	No	1
14.4833	-1.4775	0.00277176	0.115373	20159	4.30447	0.278611	No	1
14.5	-1.43173	0.00268591	0.112688	19710	4.29469	0.270133	No	1
14.5167	-1.38414	0.00259662	0.110078	19271	4.2849	0.264031	No	1
14.5333	-1.3634	0.00255772	0.107517	18843	4.27515	0.261316	No	1
14.55	-1.35121	0.00253484	0.104982	18425	4.26541	0.259269	No	1
14.5667	-1.33749	0.0025091	0.102483	18018	4.25571	0.255048	No	1
14.5833	-1.30286	0.00244415	0.100041	17620	4.24601	0.248183	No	1
14.6	-1.26198	0.00236746	0.0976609	17231	4.23631	0.243336	No	1
14.6167	-1.24841	0.00234201	0.095326	16852	4.22665	0.239626	No	1
14.6333	-1.21943	0.00228764	0.0930351	16481	4.21698	0.235056	No	1
14.65	-1.19717	0.00224587	0.0907933	16120	4.20737	0.230247	No	1
14.6667	-1.1659	0.00218722	0.0885945	15766	4.19772	0.226909	No	1
14.6833	-1.1589	0.00217407	0.0864329	15422	4.18814	0.223304	No	1
14.7	-1.12504	0.00211055	0.0843178	15085	4.17855	0.217966	No	1
14.7167	-1.10048	0.00206449	0.0822558	14756	4.16897	0.212983	No	1
14.7333	-1.07043	0.00200812	0.0802354	14435	4.15942	0.20999	No	1
14.75	-1.06633	0.00200042	0.078239	14122	4.1499	0.208667	No	1
14.7667	-1.05337	0.00197611	0.0762752	13815	4.14035	0.203831	No	1
14.7833	-1.01371	0.00190171	0.0743632	13516	4.13085	0.198494	No	1
14.8	-0.995871	0.00186824	0.0724962	13224	4.12136	0.194993	No	1
14.8167	-0.97498	0.00182905	0.0706663	12939	4.1119	0.191342	No	1
14.8333	-0.955767	0.001793	0.0688698	12660	4.10243	0.188555	No	1
14.85	-0.943725	0.00177041	0.0670928	12388	4.093	0.187849	No	1
14.8667	-0.945569	0.00177387	0.0653273	12122	4.08357	0.186712	No	1
14.8833	-0.929255	0.00174327	0.063587	11862	4.07416	0.183102	No	1
14.9	-0.90638	0.00170036	0.0618931	11608	4.06476	0.177419	No	1
14.9167	-0.869467	0.00163111	0.0602486	11360	4.05538	0.17315	No	1
14.9333	-0.860935	0.0016151	0.0586394	11118	4.04603	0.170424	No	1
14.95	-0.839586	0.00157505	0.0570681	10881	4.03667	0.165571	No	1
14.9667	-0.809997	0.00151954	0.0555398	10649	4.02731	0.161728	No	1
14.9833	-0.798871	0.00149867	0.0540467	10423	4.01799	0.158499	No	1
15	-0.775538	0.0014549	0.0525839	10202	4.00869	0.155703	No	1
15.0167	-0.768837	0.00144233	0.0511519	9986	3.99939	0.152324	No	1
15.0333	-0.739858	0.00138796	0.0497617	9775	3.99012	0.147157	No	1
15.05	-0.71561	0.00134247	0.0484137	9568	3.98082	0.143625	No	1
15.0667	-0.702958	0.00131874	0.0470847	9366	3.97155	0.143435	No	1
15.0833	-0.711821	0.00133537	0.0457657	9169	3.96232	0.141862	No	1
15.1	-0.685589	0.00128616	0.0444776	8976	3.95308	0.137116	No	1
15.1167	-0.663324	0.00124439	0.0432325	8788	3.94389	0.132896	No	1
15.1333	-0.642433	0.00120519	0.0420146	8603	3.93465	0.131554	No	1
15.15	-0.648549	0.00121667	0.0408105	8423	3.92547	0.130203	No	1
15.1667	-0.627658	0.00117748	0.039636	8246	3.91624	0.125431	No	1
15.1833	-0.600358	0.00112626	0.038502	8074	3.90709	0.121658	No	1
15.2	-0.589384	0.00110568	0.0373979	7905	3.8979	0.119183	No	1
15.2167	-0.574901	0.00107851	0.0363196	7740	3.88874	0.116276	No	1
15.2333	-0.559808	0.00105019	0.035267	7579	3.87961	0.113796	No	1
15.25	-0.549598	0.00103104	0.0342406	7421	3.87046	0.110774	No	1
15.2667	-0.529317	0.00099299	0.0332452	7267	3.86136	0.107223	No	1
15.2833	-0.514071	0.00096439	0.0322704	7116	3.85224	0.106455	No	1
15.3	-0.52095	0.000977295	0.031307	6968	3.84311	0.104895	No	1
15.3167	-0.498075	0.000934382	0.0303633	6823	3.83398	0.10229	No	1
15.3333	-0.494884	0.000928395	0.0294394	6682	3.82491	0.100698	No	1
15.35	-0.481927	0.000904088	0.0285328	6543	3.81578	0.0986271	No	1
15.3667	-0.474158	0.000889513	0.0276429	6408	3.80672	0.0971621	No	1
15.3833	-0.467152	0.00087637	0.0267743	6275	3.79761	0.0940353	No	1
15.4	-0.443361	0.000831739	0.0259389	6145	3.78852	0.0899696	No	1
15.4167	-0.427352	0.000801707	0.0251277	6018	3.77945	0.0887815	No	1
15.4333	-0.431485	0.00080946	0.0243296	5894	3.77041	0.0871453	No	1
15.45	-0.411204	0.000771413	0.0235551	5772	3.76133	0.0836559	No	1
15.4667	-0.397484	0.000745675	0.0228073	5653	3.75228	0.081296	No	1
15.4833	-0.388189	0.000728238	0.0220774	5536	3.7432	0.0797353	No	1
15.5	-0.382252	0.000717098	0.0213689	5422	3.73416	0.0766053	No	1
15.5167	-0.35785	0.000671322	0.0206908	5310	3.72509	0.0730589	No	1
15.5333	-0.347945	0.00065274	0.0200386	5200	3.716	0.0708814	No	1
15.55	-0.336819	0.000631868	0.0194057	5093	3.70697	0.0687782	No	1
15.5667	-0.327677	0.000614718	0.018791	4987	3.69784	0.0668759	No	1
15.5833	-0.318535	0.000597567	0.018192	4884	3.68878	0.0652694	No	1
15.6	-0.312292	0.000585855	0.0176056	4783	3.6797	0.0640692	No	1
15.6167	-0.307117	0.000576147	0.0170293	4685	3.67071	0.0630069	No	1
15.6333	-0.302247	0.000567011	0.0164619	4588	3.66162	0.0620511	No	1
15.65	-0.29814	0.000559307	0.0158975	4493	3.65254	0.0622735	No	1
15.6667	-0.304714	0.00057164	0.0153286	4400	3.64345	0.0629947	No	1
15.6833	-0.30549	0.000573096	0.0147651	4309	3.63438	0.0609866	No	1
15.7	-0.285667	0.000535907	0.014222	4219	3.62521	0.0584257	No	1
15.7167	-0.281102	0.000527344	0.013693	4132	3.61616	0.0577972	No	1
15.7333	-0.280047	0.000525365	0.0131711	4046	3.60703	0.0567566	No	1
15.75	-0.271515	0.000509359	0.012663	3962	3.59791	0.0546464	No	1
15.7667	-0.260084	0.000487914	0.0121664	3880	3.58883	0.0541497	No	1
15.7833	-0.267269	0.000501393	0.0116748	3799	3.57967	0.0533989	No	1
15.8	-0.253396	0.000475368	0.0111943	3719	3.57043	0.0516135	No	1
15.8167	-0.25051	0.000469954	0.0107249	3642	3.56134	0.0508112	No	1
15.8333	-0.246251	0.000461963	0.0102648	3566	3.55218	0.049461	No	1
15.85	-0.238024	0.00044653	0.00982187	3491	3.54295	0.0469121	No	1
15.8667	-0.222015	0.000416498	0.00939976	3418	3.53377	0.0447861	No	1
15.8833	-0.217909	0.000408793	0.00900296	3346	3.52453	0.0412674	No	1
15.9	-0.188167	0.000352998	0.00863241	3276	3.51534	0.0389491	No	1
15.9167	-0.195809	0.000367335	0.00826254	3206	3.50596	0.0409609	No	1
15.9333	-0.208792	0.000391691	0.00787719	3139	3.49679	0.042128	No	1
15.95	-0.208195	0.000390571	0.0074969	3072	3.48742	0.0397015	No	1
15.9667	-0.185625	0.00034823	0.00713949	3007	3.47813	0.037036	No	1
15.9833	-0.182586	0.000342529	0.00679193	2943	3.46879	0.0374104	No	1
16	-0.190229	0.000356866	0.00644477	2880	3.45939	0.0367709	No	1
16.0167	-0.177119	0.000332273	0.00611476	2819	3.4501	0.0335711	No	1
16.0333	-0.159127	0.000298519	0.00580463	2758	3.44059	0.0323595	No	1
16.05	-0.165854	0.000311139	0.00549698	2699	3.4312	0.0328629	No	1
16.0667	-0.165104	0.000309732	0.00518973	2641	3.42177	0.0320906	No	1
16.0833	-0.159013	0.000298306	0.00488761	2584	3.41229	0.0315903	No	1
16.1	-0.16101	0.000302052	0.00459541	2528	3.40278	0.0298129	No	1
16.1167	-0.141949	0.000266295	0.00432459	2473	3.39322	0.0269207	No	1
16.1333	-0.132502	0.000248572	0.00408266	2419	3.38364	0.0235966	No	1
16.15	-0.108864	0.000204227	0.00386489	2366	3.37401	0.0217192	No	1
16.1667	-0.114065	0.000213984	0.00365412	2314	3.36436	0.0219853	No	1
16.1833	-0.112399	0.00021086	0.00344245	2263	3.35468	0.021745	No	1
16.2	-0.112412	0.000210884	0.00323206	2213	3.34498	0.0215626	No	1
16.2167	-0.111357	0.000208905	0.00303101	2164	3.33526	0.0196651	No	1
16.2333	-0.0935175	0.000175437	0.00284132	2116	3.32552	0.0190784	No	1
16.25	-0.106043	0.000198935	0.00265389	2068	3.31555	0.019046	No	1
16.2667	-0.0940013	0.000176345	0.00247374	2022	3.30578	0.017449	No	1
16.2833	-0.090047	0.000168927	0.0023003	1976	3.29579	0.0175342	No	1
16.3	-0.0957058	0.000179543	0.00212525	1931	3.28578	0.0176163	No	1
16.3167	-0.0917515	0.000172125	0.00195719	1887	3.27577	0.0159824	No	1
16.3333	-0.0790997	0.00014839	0.001802	1844	3.26576	0.0149013	No	1
16.35	-0.0809438	0.000151849	0.00164792	1802	3.25575	0.0156098	No	1
16.3667	-0.0875181	0.000164183	0.00148057	1760	3.24551	0.0173646	No	1
16.3833	-0.100806	0.000189111	0.00130247	1719	3.23528	0.0175597	No	1
16.4	-0.0905959	0.000169957	0.00113014	1679	3.22505	0.0160652	No	1
16.4167	-0.0854209	0.000160248	0.000973104	1640	3.21484	0.0144177	No	1
16.4333	-0.0733795	0.000137659	0.000835866	1601	3.20439	0.0120828	No	1
16.45	-0.0604225	0.000113352	0.000711699	1563	3.19396	0.0117586	No	1
16.4667	-0.0705063	0.000132269	0.000588582	1526	3.18355	0.0117496	No	1
16.4833	-0.0610589	0.000114546	0.000473385	1489	3.17289	0.0101267	No	1
16.5	-0.0529848	9.93987e-05	0.000369256	1453	3.16227	0.00953122	No	1
16.5167	-0.0549814	0.000103144	0.000269898	1418	3.15168	0.0091154	No	1
16.5333	-0.0488909	9.17187e-05	0.000177958	1384	3.14114	0.00803773	No	1
16.55	-0.0432582	8.11517e-05	9.95209e-05	1350	3.13033	0.00650901	No	1
16.5667	-0.0318271	5.97072e-05	3.21519e-05	1316	3.11926	0.00590523	No	1
