# Supplementary material for: Descriptive study and evaluation of shrink hoods with recycled content for regulatory compliance
Source: Research Square preprint supplement (doi:10.21203/rs.3.rs-6261320/v1), 2025-06-25
Supplement: Supplementary file 8 [file d29ec1bab66a84908bb0c8ad.docx]

# DSC-plots

## Cooling + second heating

### F-35PCR_A

### PCR A (dark)

### PCR A (light)

### PCR A: dark vs light

### PCR A (dark/light) vs. F-35PCR_A

### F-35PCR_A vs. PCR A

### F-30PCR_C

### PCR C

### F-30PCR_C vs. PCR C

### PCR A vs. PCR C

### F-30PCR_D

### F-30PCR

### F_35PCR_B

### F_35PCR

### All films

## Relevant zoomed-in comparisons of second heating cycles (names: Film 1 = F-35PCR_A; Film 2 = F-35PCR_B; Film 3 = F-30PCR_C; Film 4 = F-30PCR_D).

## Relevant comparison of (mainly) first heating cycles, zoomed in

First heating cycles
